# Supplementary material for: DFT insight into asymmetric alkyl–alkyl bond formation via nickel-catalysed enantioconvergent reductive coupling of racemic electrophiles with olefins
Source: Royal Society of Chemistry journal article supplement (doi:10.1039/d1sc05605k), 2022-01-01
Supplement: d1sc05605k1.pdf [file d1sc05605k1.pdf]

## Supplementary Information

### DFT Insight into Asymmetric Alkyl-Alkyl Bond Formation via Nickel-Catalysed Enantioconvergent Reductive Coupling of Racemic Electrophiles with Olefins

Chao-Shen Zhang,<sup>a</sup> Bei-Bei Zhang,<sup>a</sup> Liang Zhong,<sup>a</sup> Xiang-Yu Chen<sup>\*,a</sup> Zhi-Xiang Wang<sup>\*,a</sup>

<sup>a</sup> School of Chemical Sciences, University of the Chinese Academy of Sciences, Beijing 100049, China

E-mail: chenxiangyu20@ucas.ac.cn;  
zxwang@ucas.ac.cn.

#### Table of Contents

|                                                                                                        |    |
|--------------------------------------------------------------------------------------------------------|----|
| SI1. Results related to spin contaminations .....                                                      | 2  |
| SI2. Results for calculation method validation .....                                                   | 4  |
| SI3. Energetics for ligand exchange process .....                                                      | 7  |
| SI4. Binding energies of K <sub>3</sub> PO <sub>4</sub> with [Si]H, solvent and substrates .....       | 8  |
| SI5. Experimentally reported reductive hydrofunctionalizations of alkenes and proposed mechanism ..... | 9  |
| SI6. IRC results to verify the correctness of important transition states .....                        | 11 |
| SI7. Additional results for leading <sup>1</sup> IM6 to the product 3 .....                            | 14 |
| SI8. Results to consider the effect of K <sub>3</sub> PO <sub>4</sub> on <sup>2</sup> TS13-Br .....    | 16 |
| SI9. Results for potential energy surface (PES) scan .....                                             | 17 |
| SI10. The radical-chain mechanism in the absence of [Si]H and K <sub>3</sub> PO <sub>4</sub> .....     | 18 |
| SI11. Energetic results of the key processes with a secondary alkyl bromide as the electrophile .....  | 20 |
| SI12. References .....                                                                                 | 23 |
| SI13. Cartesian coordinates in Å, SCF energies and free energies (in a.u.) .....                       | 24 |

## SI1. Results related to spin contaminations

Attentions were paid to the spin contaminations of open shell species. **Table S1** lists the  $\langle S^2 \rangle$  values of the species. As compared,  $\langle S^2 \rangle$  values after annihilation are generally close to the standard values, except for those (highlighted in blue) involved in the rebound processes, are somewhat large. To estimate the energetic influences of the spin contaminations, we used the following formula<sup>1</sup> to correct the energies of the open shell singlet, where  $S_0$  and  $S_1$  are the annihilated spin contamination values of the open-shell singlet and triplet states, respectively.  $E_0$  and  $E_1$  are the energies of calculated open-shell singlet and triplet at the same geometry.

$$E \approx \frac{S_1^2 E_0 - S_0^2 E_1}{S_1^2 - S_0^2}$$

**Table S2** shows the energy corrections ( $\Delta E$ ) due to spin contaminations for these species (e.g. <sup>1</sup>TS11-R, <sup>1</sup>TS11-S, <sup>1</sup>TS12-R and <sup>1</sup>TS12-S) with relatively large spin contaminations. It can be found that the energy corrections are small. Thus, the spin contaminations would not affect our proposed mechanism. In the main text, we used the energies without spin contamination corrections.

**Table S1.**  $\langle S^2 \rangle$  values of the structures in the main text.

|                                                 | Spin contaminant [ $S^*(S+1)$ ] |                    | Spin state |
|-------------------------------------------------|---------------------------------|--------------------|------------|
|                                                 | Before annihilation             | After annihilation |            |
| <sup>1</sup> NiBr <sub>2</sub> ·glyme           | 0.9814                          | 0.0269             | OS         |
| <sup>3</sup> NiBr <sub>2</sub> ·glyme           | 2.0089                          | 2.0000             | Triplet    |
| <sup>1</sup> [Ni <sup>II</sup> ]Br <sub>2</sub> | 0.7054                          | 0.0161             | OS         |
| <sup>3</sup> [Ni <sup>II</sup> ]Br <sub>2</sub> | 2.0104                          | 2.0001             | Triplet    |
| <sup>1</sup> TS1                                | 1.0010                          | 0.0497             | OS         |
| <sup>3</sup> TS1                                | 2.0085                          | 2.0000             | Triplet    |
| <sup>1</sup> TS2                                | 0.6266                          | 0.0087             | OS         |
| <sup>3</sup> TS2                                | 2.0077                          | 2.0000             | Triplet    |
| <sup>1</sup> TS3                                | 0.9954                          | 0.0214             | OS         |
| <sup>3</sup> TS3                                | 2.0067                          | 2.0000             | Triplet    |
| <sup>1</sup> [Ni <sup>II</sup> ]BrH             | 0.0000                          | 0.0000             | CS         |
| <sup>3</sup> [Ni <sup>II</sup> ]BrH             | 2.0111                          | 2.0001             | Triplet    |
| <sup>1</sup> TS4                                | 0.6985                          | 0.0182             | OS         |
| <sup>3</sup> TS4                                | 2.0124                          | 2.0001             | Triplet    |
| <sup>1</sup> [Ni <sup>II</sup> ]H <sub>2</sub>  | 0.0000                          | 0.0000             | CS         |
| <sup>3</sup> [Ni <sup>II</sup> ]H <sub>2</sub>  | 2.0137                          | 2.0001             | Triplet    |
| <sup>1</sup> TS5                                | 0.0000                          | 0.0000             | CS         |
| <sup>3</sup> TS5                                | 2.0163                          | 2.0002             | Triplet    |
| <sup>1</sup> IM1                                | 0.0000                          | 0.0000             | CS         |
| <sup>3</sup> IM1                                | 2.0153                          | 2.0001             | Triplet    |
| <sup>1</sup> TS6                                | 0.2556                          | 0.0112             | OS         |
| <sup>3</sup> TS6                                | 0.0135                          | 0.0001             | Triplet    |
| <sup>1</sup> [Ni <sup>0</sup> ]                 | 0.0000                          | 0.0000             | CS         |

|                                         |        |        |         |
|-----------------------------------------|--------|--------|---------|
| <sup>3</sup> [Ni <sup>0</sup> ]         | 2.0145 | 2.0001 | Triplet |
| <sup>1</sup> IM2- <i>R</i>              | 0.0000 | 0.0000 | CS      |
| <sup>1</sup> IM2- <i>S</i>              | 0.0000 | 0.0000 | CS      |
| <sup>1</sup> TS7- <i>R</i>              | 0.5535 | 0.0305 | OS      |
| <sup>1</sup> TS7- <i>S</i>              | 0.5418 | 0.0291 | OS      |
| <sup>1</sup> IM3- <i>R</i> <sup>+</sup> | 0.1256 | 0.0005 | OS      |
| <sup>1</sup> IM3- <i>S</i> <sup>+</sup> | 0.0928 | 0.0003 | OS      |
| <sup>1</sup> IM4- <i>R</i>              | 0.9519 | 0.0465 | OS      |
| <sup>1</sup> IM4- <i>S</i>              | 0.4912 | 0.0090 | OS      |
| <sup>1</sup> TS8- <i>R</i>              | 0.7837 | 0.0176 | OS      |
| <sup>1</sup> TS8- <i>S</i>              | 0.7589 | 0.0246 | OS      |
| <sup>1</sup> IM5- <i>R</i>              | 0.0000 | 0.0000 | CS      |
| <sup>1</sup> IM5- <i>S</i>              | 0.0000 | 0.0000 | CS      |
| <sup>1</sup> TS9- <i>R</i>              | 0.0000 | 0.0000 | CS      |
| <sup>1</sup> TS9- <i>S</i>              | 0.0000 | 0.0000 | CS      |
| <sup>1</sup> IM6- <i>R</i>              | 0.0000 | 0.0000 | CS      |
| <sup>1</sup> IM6- <i>S</i>              | 0.0000 | 0.0000 | CS      |
| <sup>1</sup> TS10- <i>R</i>             | 0.0000 | 0.0000 | CS      |
| <sup>1</sup> TS10- <i>S</i>             | 0.0000 | 0.0000 | CS      |
| <sup>1</sup> TS11- <i>R</i>             | 0.9712 | 0.1340 | OS      |
| <sup>1</sup> TS11- <i>S</i>             | 1.0055 | 0.1437 | OS      |
| <sup>2</sup> [Ni <sup>1</sup> ]Br       | 0.7643 | 0.7502 | doublet |
| <sup>1</sup> TS12- <i>R</i>             | 1.0141 | 0.2209 | OS      |
| <sup>1</sup> TS12- <i>S</i>             | 1.0206 | 0.2145 | OS      |
| <sup>2</sup> IM7                        | 0.7672 | 0.7502 | doublet |

**Table S2.** Spin contamination-corrected energies of the transition states involved in the rebound process.

| TS <sub>s</sub>             | E <sub>0</sub> (a.u.) | S <sub>0</sub> | E <sub>1</sub> (a.u.) | S <sub>1</sub> | E(a.u.)      | ΔE=E-E <sub>0</sub><br>(kcal/mol) |
|-----------------------------|-----------------------|----------------|-----------------------|----------------|--------------|-----------------------------------|
| <sup>1</sup> TS11- <i>R</i> | -2697.89707849        | 0.1340         | -2697.901572          | 2.0005         | -2697.897058 | 0.01                              |
| <sup>1</sup> TS11- <i>S</i> | -2697.89940638        | 0.1437         | -2697.896423          | 2.0005         | -2697.899422 | -0.01                             |
| <sup>1</sup> TS12- <i>R</i> | -2920.79059200        | 0.2209         | -2920.790980          | 2.0009         | -2920.790587 | 0.00                              |
| <sup>1</sup> TS12- <i>S</i> | -2920.78895000        | 0.2145         | -2920.790517          | 2.0009         | -2920.788932 | 0.01                              |

## SI2. Results for calculation method validation

The species involved in our study are quite large, containing up to 145 atoms. To reduce the computation cost, we computed the reaction pathways at M06(SMD, THF)/BSII//UB3LYP(gas)/BSI level. To validate the reliability of the protocol, we performed the following calibration calculations.

(A) We compared the results of the precatalyst ( $^1\text{Ni}^{\text{II}}\text{Br}_2$ ) calculated at M06(SMD, THF)/BSII//UB3LYP(gas)/BSI and M06(SMD, THF)/BSII//UB3LYP-D3BJ(SMD, THF)/BSI levels, respectively. As compared in Fig. S1, the results at the two levels of calculations agree with each other well.

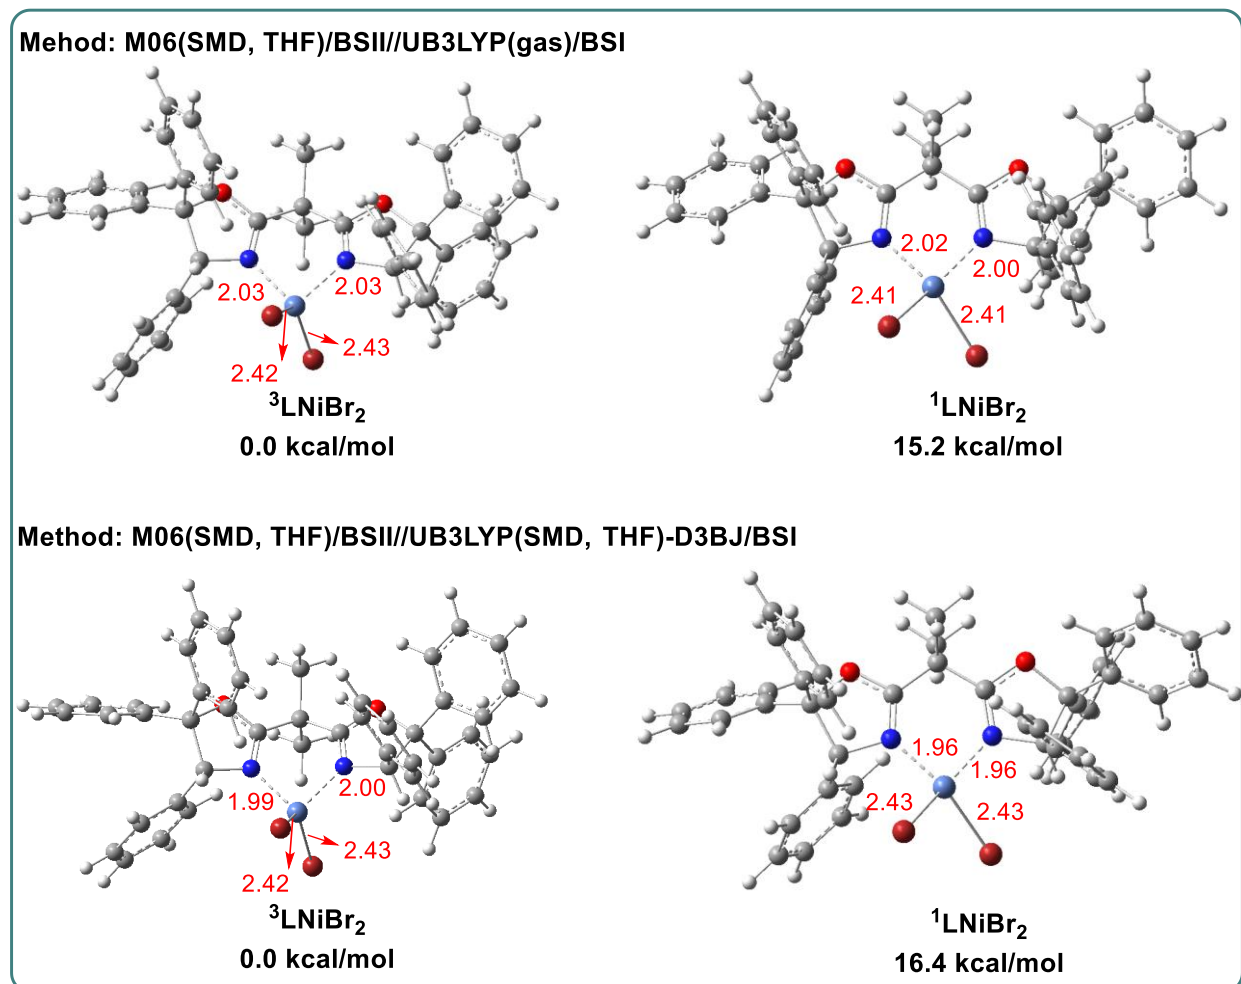

**Fig. S1.** Comparing the results of precatalyst ( $^1\text{Ni}^{\text{II}}\text{Br}_2$ ) calculated at the two levels of calculations. The key bond lengths are given in angstroms.

(B)  $^1\text{TS10-R}/^1\text{TS10-S}$  and  $^1\text{TS12-R}/^1\text{TS12-S}$  are key transition states involved in our proposed mechanism (Fig. 2 in the main text). Using the transition states, we calculated their relative energies at other two levels (M06(SMD, THF)/BSII//UB3LYP-D3BJ(SMD, THF)/BSI (Level 2) and UB3LYP-D3BJ(SMD, THF)/BSII//UB3LYP-D3BJ(SMD, THF)/BSI (Level 3)). Comparing the results in Fig. S2, we have the following observations: (i) The optimized structures at UB3LYP-D3BJ(SMD, THF)/BSI level are in good

agreement with those at B3LYP (gas)/BSI level. (ii) Like level 1 used in the main text, Levels 2 and 3 also predicted  ${}^1\text{TS10-S}$  to be lower than  ${}^1\text{TS10-R}$ , which is in agreement with the experimentally observed enantioselectivity. (iii) Comparing to level 1, levels 2 and 3 predicted  ${}^1\text{TS12-R}/{}^1\text{TS12-S}$  to be more significantly lower than  ${}^1\text{TS10-R}/{}^1\text{TS10-S}$ . This indicates that the Ni-C bond cleavage can take place kinetically more favorable, which favors our proposed mechanism.

|                     | M06(SMD, THF)/BSII//<br>B3LYP (gas)/BSI<br>(Level 1) | M06(SMD, THF)/ BSII//B3LYP-<br>D3BJ(SMD, THF)/BSI<br>(Level 2) | B3LYP-D3BJ(SMD, THF)/BSII<br>//B3LYP-D3BJ(SMD, THF)/BSI<br>(Level 3) |
|---------------------|------------------------------------------------------|----------------------------------------------------------------|----------------------------------------------------------------------|
| ${}^1\text{TS10-S}$ | 0.0                                                  | 0.0                                                            | 0.0                                                                  |
| ${}^1\text{TS10-R}$ | 2.6                                                  | 2.6                                                            | 3.4                                                                  |
| ${}^1\text{TS12-R}$ | -1.0                                                 | -3.0                                                           | -8.9                                                                 |
| ${}^1\text{TS12-S}$ | -2.3                                                 | -3.5                                                           | -7.8                                                                 |

  

**Optimized structures at UB3LYP(gas)/BSI**

**Optimized structures at UB3LYP-D3BJ(SMD, THF)/BSI**

**Fig. S2.** Comparing the results of  ${}^1\text{TS10-R}/{}^1\text{TS10-S}$  and  ${}^1\text{TS12-R}/{}^1\text{TS12-S}$  at three levels of calculations.

**(C)** Using  ${}^1\text{TS10-R}/{}^1\text{TS10-S}$  and  ${}^1\text{TS12-R}/{}^1\text{TS12-S}$ , we further calculated the relative energies of the transition states calculated with DFT functionals having different percentage of Hartree-Fock exchange. Compared to B3LYP with 20% HF exchange, the examined wB97XD and M11 functionals have 25%, and 43% HF exchange, respectively. Comparing the results in **Fig. S3**, we have the following observations: (i) Like M06(SMD, THF)/BSII// B3LYP (gas)/BSI used in the main text, wB97XD(SMD, THF)/BSII//wB97XD (gas)/BSI and M11(SMD, THF)/BSII//M11(gas)/BSI also predicted  ${}^1\text{TS10-S}$  to be lower than  ${}^1\text{TS10-R}$ , which is in agreement with the experimentally observed enantioselectivity. (ii) Comparing to M06(SMD, THF)/BSII//B3LYP(gas)/BSI level, wB97XD(SMD, THF)/BSII//wB97XD (gas)/BSI and M11(SMD, THF)/BSII//M11(gas)/BSI predicted  ${}^1\text{TS12-R}/{}^1\text{TS12-S}$  to be more significantly lower than  ${}^1\text{TS10-R}/{}^1\text{TS10-S}$ . This indicates that the Ni-C bond cleavage can take place more kinetically favorable, which favors our proposed mechanism.

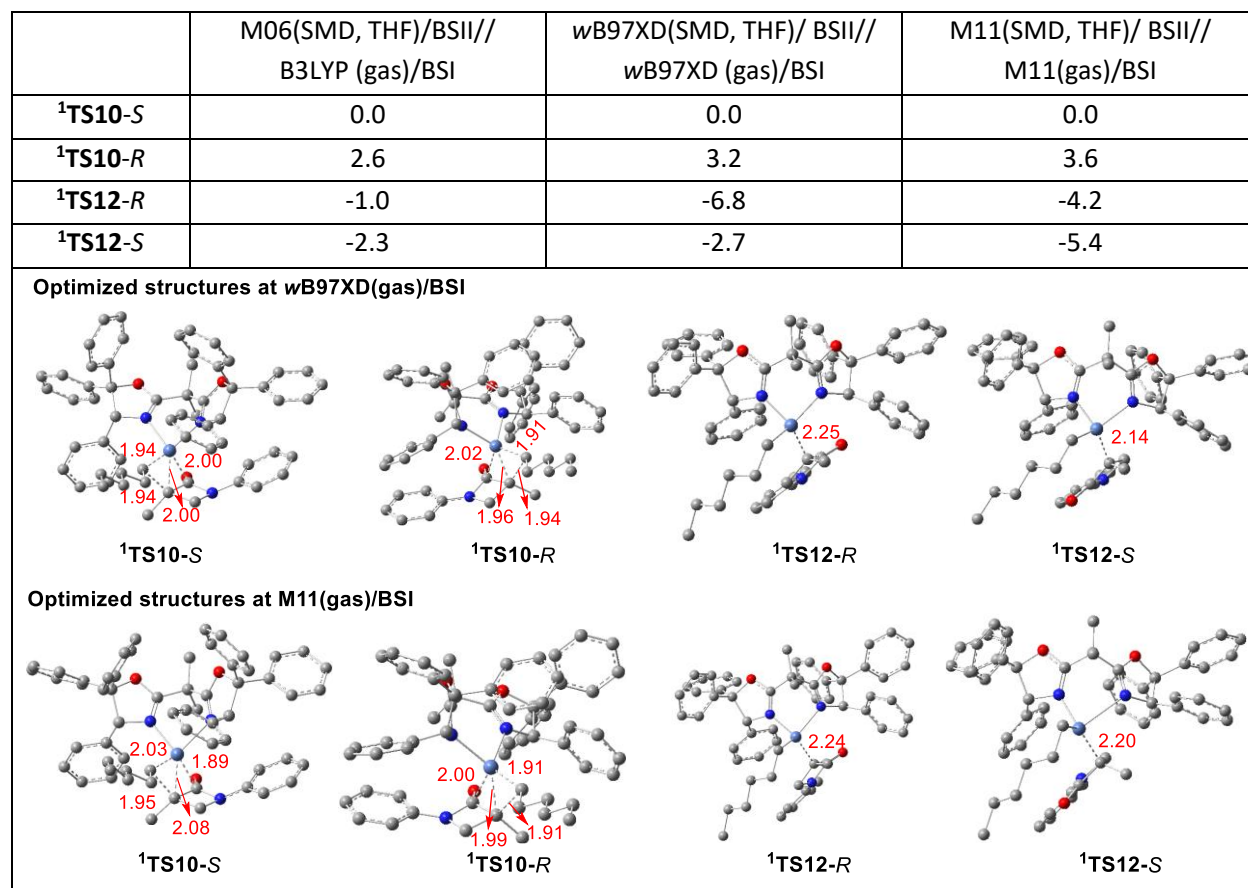

**Fig. S3.** Comparing the results of <sup>1</sup>TS10-R/<sup>1</sup>TS10-S and <sup>1</sup>TS12-R/<sup>1</sup>TS12-S with DFT functionals having different percentage of Hartree-Fock exchange.

### SI3. Energetics for ligand exchange process

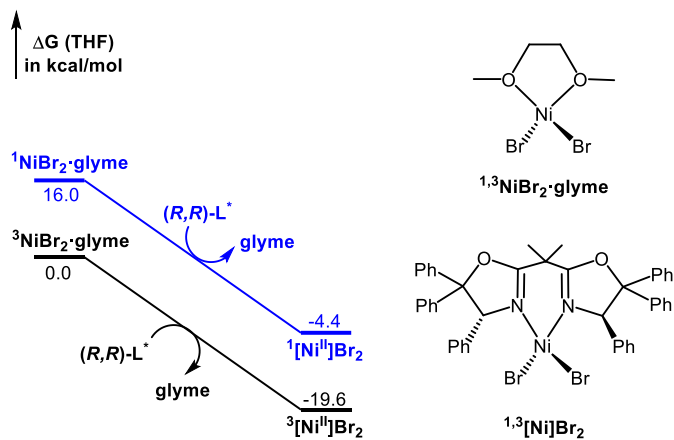

Fig. S4. Energetic results for ligand  $(R,R)\text{-L}^*$  exchange with  $\text{NiBr}_2\cdot\text{glyme}$  precursor.

### SI4. Binding energies of $K_3PO_4$ with $[Si]H$ , solvent and substrates

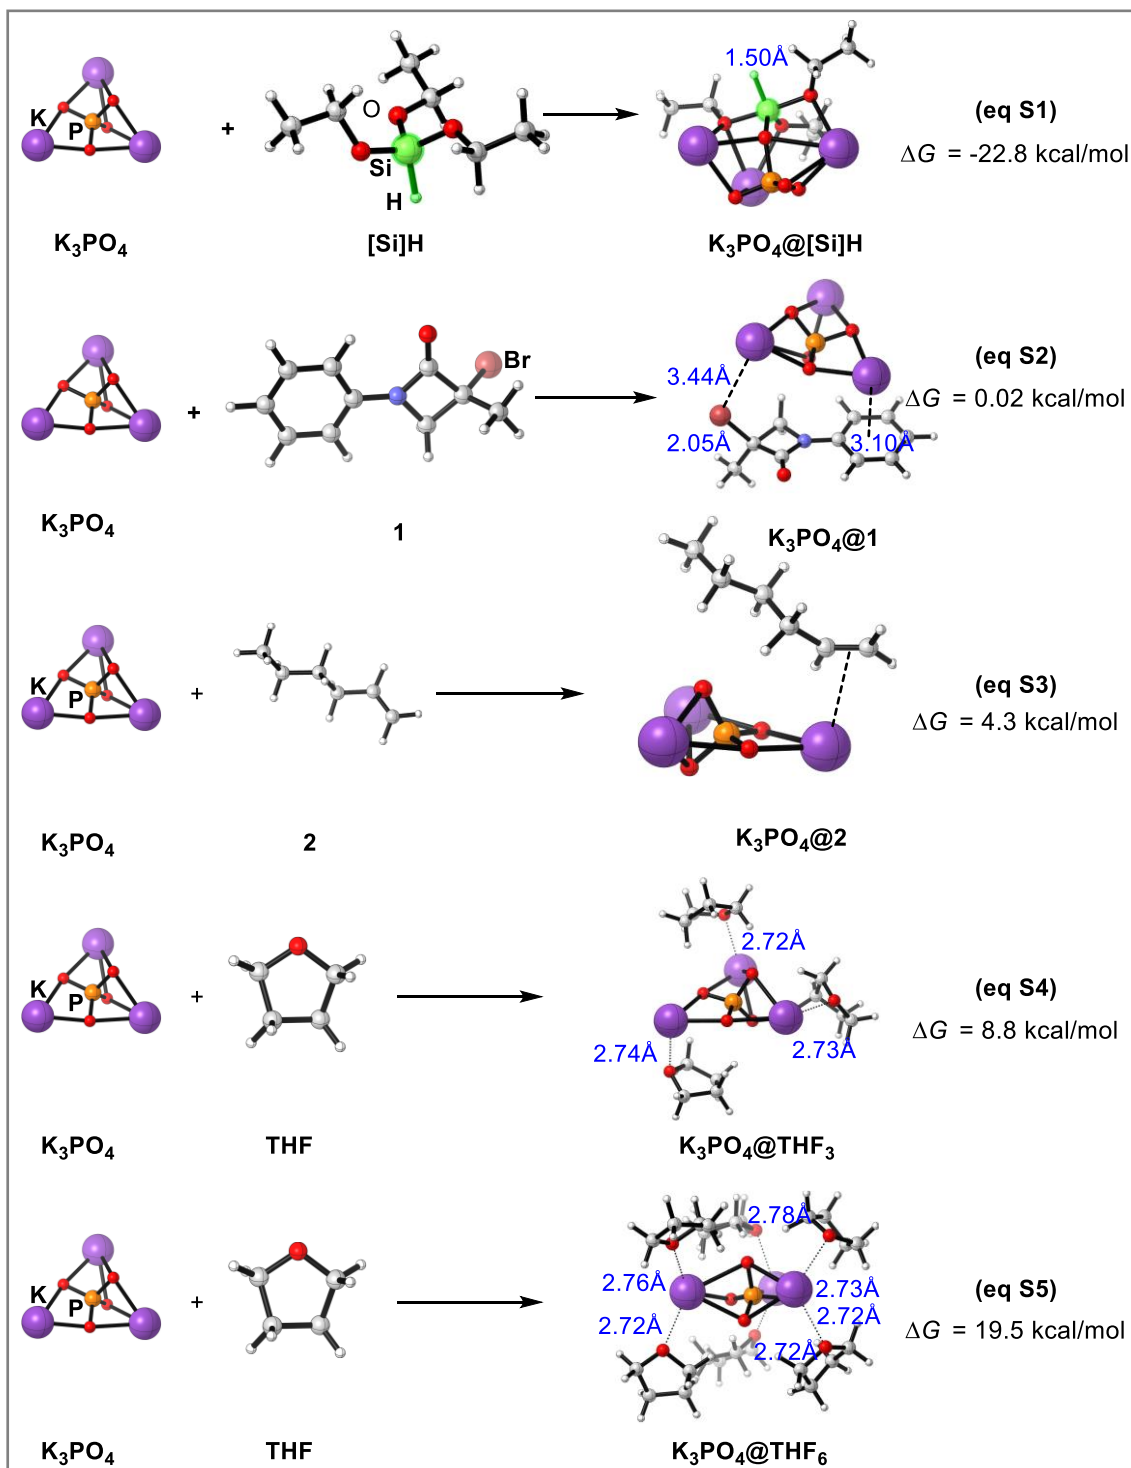

**Fig. S5.** Binding energies of the complexes between  $K_3PO_4$  with **1** or **2**, or  $H[Si]$  or THF. Key bond lengths in the structures are given in angstroms.



## S15. Experimentally reported reductive hydrofunctionalizations of alkenes and proposed mechanism

Over the past several years, several multicomponent catalytic systems involving nickel (II) precursors such as NiBr<sub>2</sub>·glyme, hydrosilane, and bases such as K<sub>3</sub>PO<sub>4</sub> or LiF have been developed to perform reductive hydrofunctionalization of alkenes.<sup>2-5</sup> In those experimental studies, nickel hydrides were postulated to be the active catalysts (see **Fig. S6**). However, these proposals have not been verified experimentally or computationally. To examine whether our proposed precatalyst initiation mechanism applies for those reactions, we calculated the initiation mechanism of eq S9. The energetic results in **Fig. S7** indicates that the nickel (II) precatalyst (<sup>3</sup>LNiCl<sub>2</sub>) can also be converted to nickel (0) species.

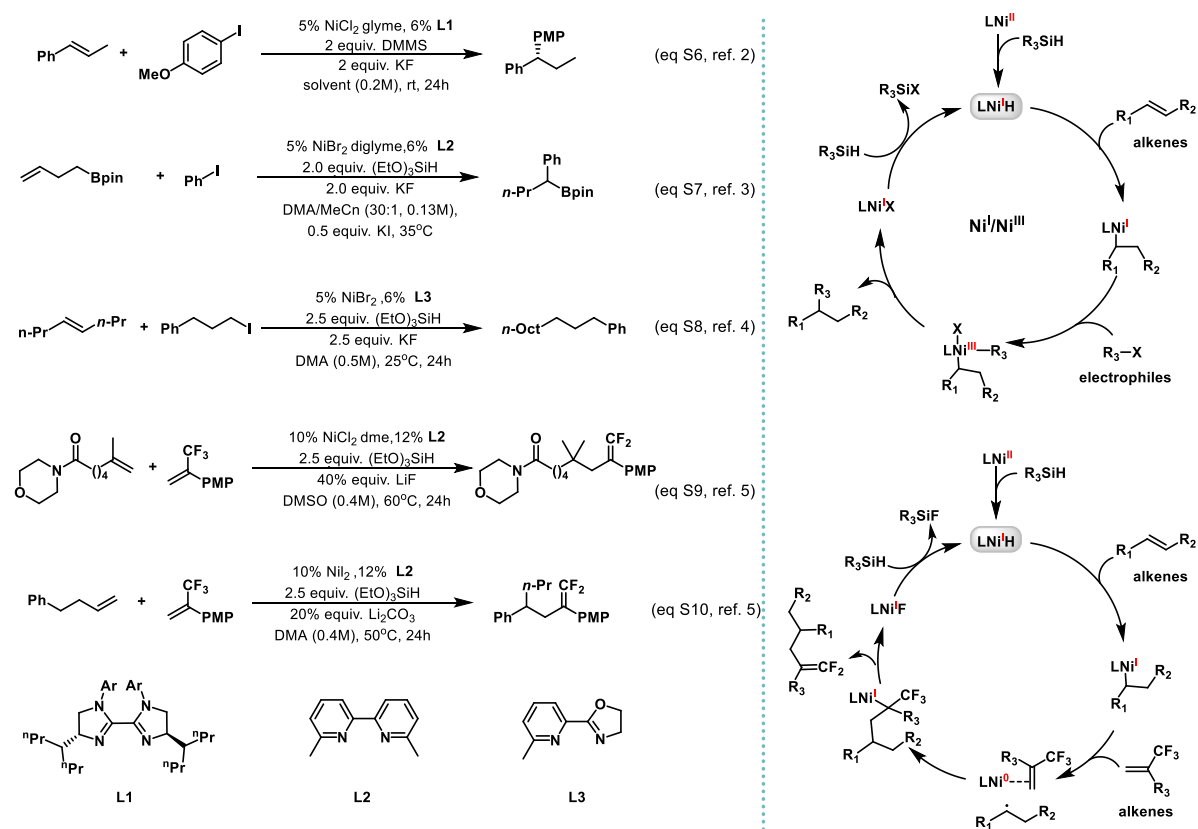

**Fig. S6.** Reductive hydrofunctionalizations of alkenes and the proposed catalytic cycles with nickel (I) hydrides as the active catalysts.

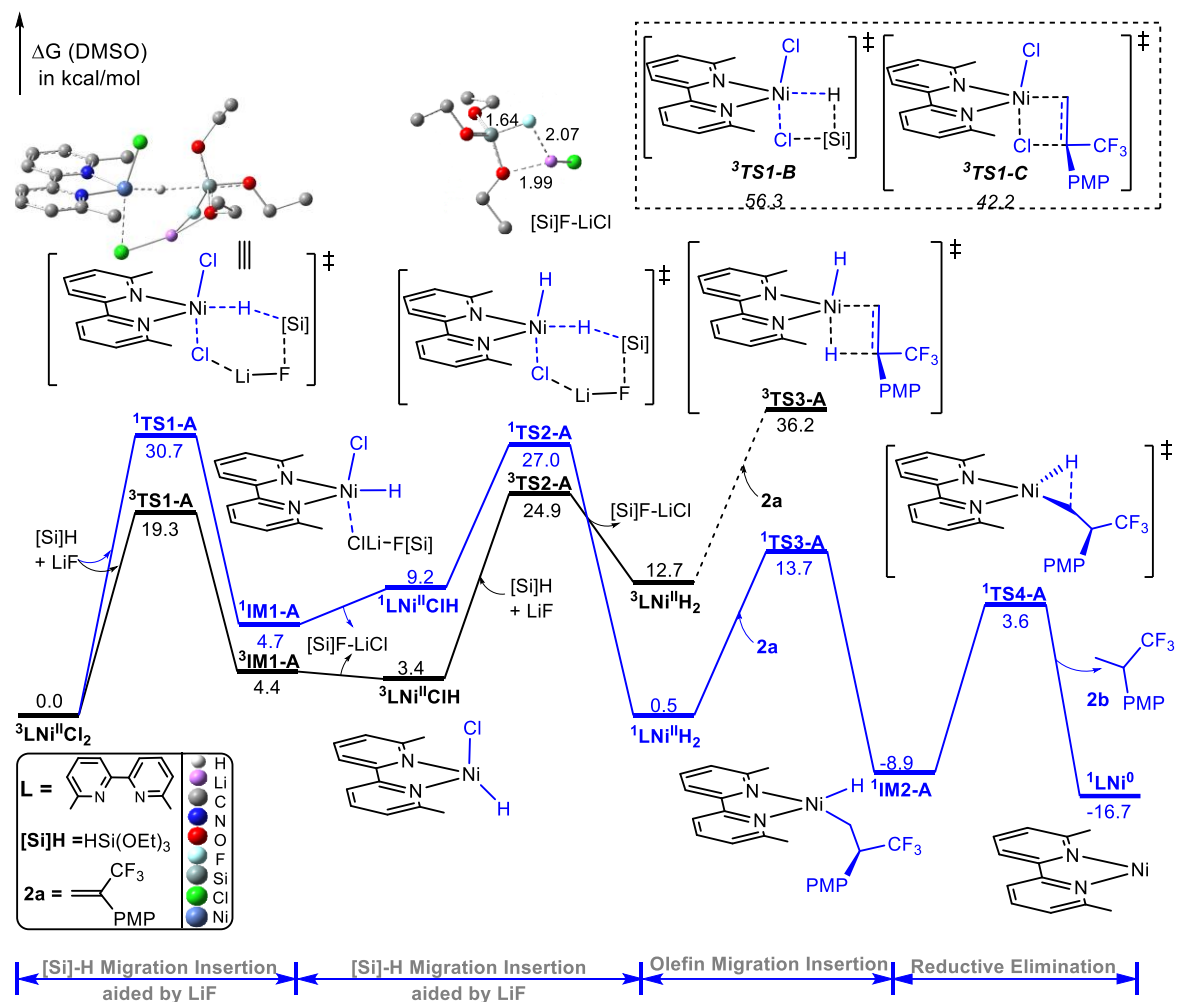

**Fig. S7.** Free energy profile for precatalyst initiation to give nickel (0) species, using eq S9 in **Fig. S6** as an example.

## SI6. IRC results to verify the correctness of important transition states

To verify a transition state correctly connecting to the desired forward and backward intermediates, we performed IRC (intrinsic reaction coordinate) calculations for the important transition states ( ${}^1\text{TS7-R}/{}^1\text{TS7-S}$ , and  ${}^1\text{TS12-S}$ ). The IRC results in Fig. S8-S11 indicate that these transition states correctly connect to their forward and backward intermediates.

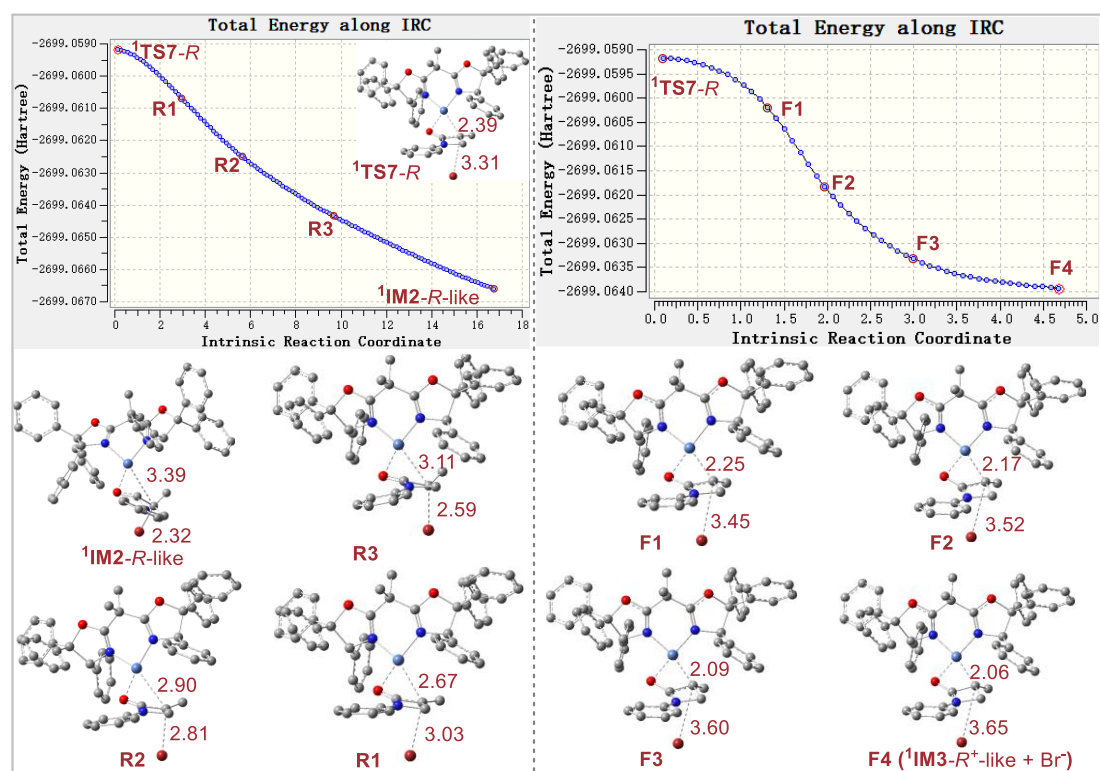

**Fig. S8.** IRC results showing that  ${}^1\text{TS7-R}$  connects to  ${}^1\text{IM3-R}^+$  in the forward direction and  ${}^1\text{IM2-R}$  in the backward direction. Note that the geometric optimization starting at  ${}^1\text{IM2-R-like}$  structure, obtained after 120 IRC step, converged to  ${}^1\text{IM2-R}$ .

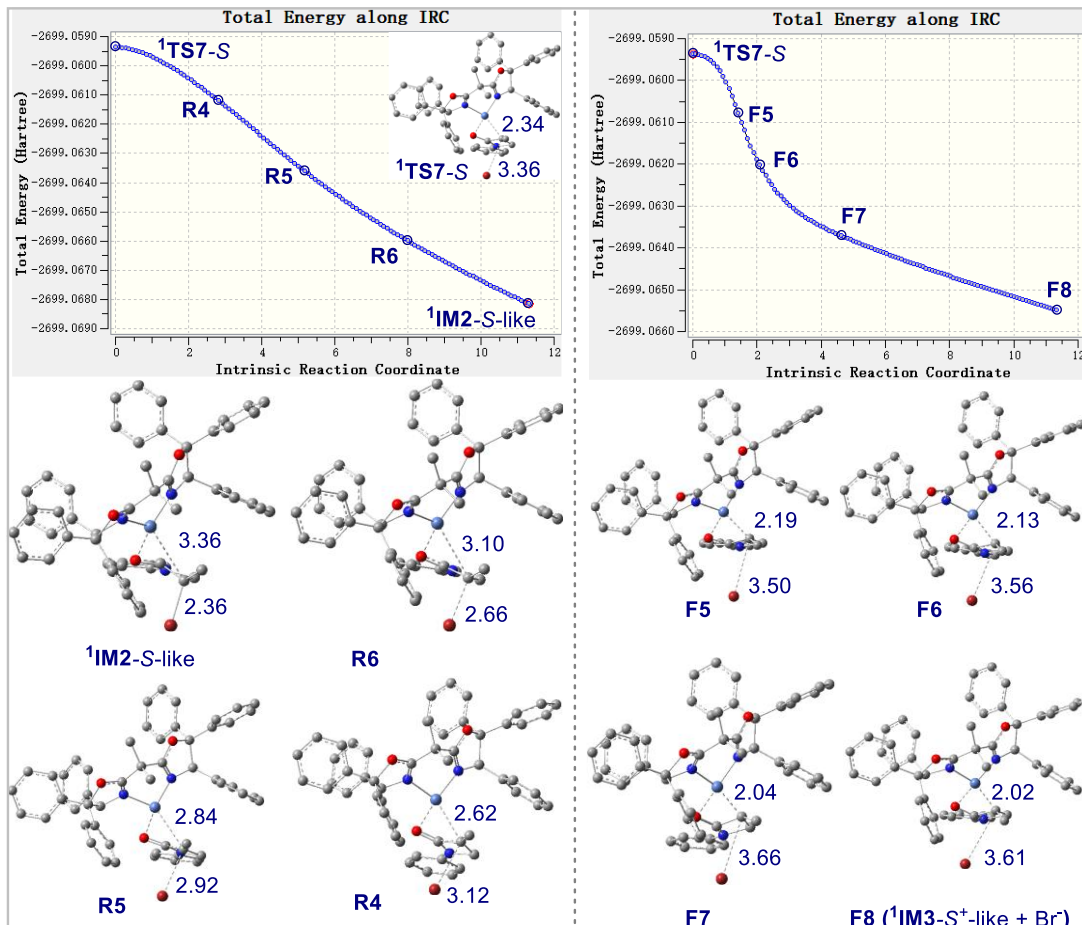

**Fig. S9.** IRC results showing that  $^1\text{TS7-S}$  connect to  $^1\text{IM3-S}^+$  in the forward direction and  $^1\text{IM2-S}$  in the backward direction. Note that the geometric optimization starting at  $^1\text{IM2-S-like}$  structure, obtained after 120 IRC step, converged to  $^1\text{IM2-S}$ .

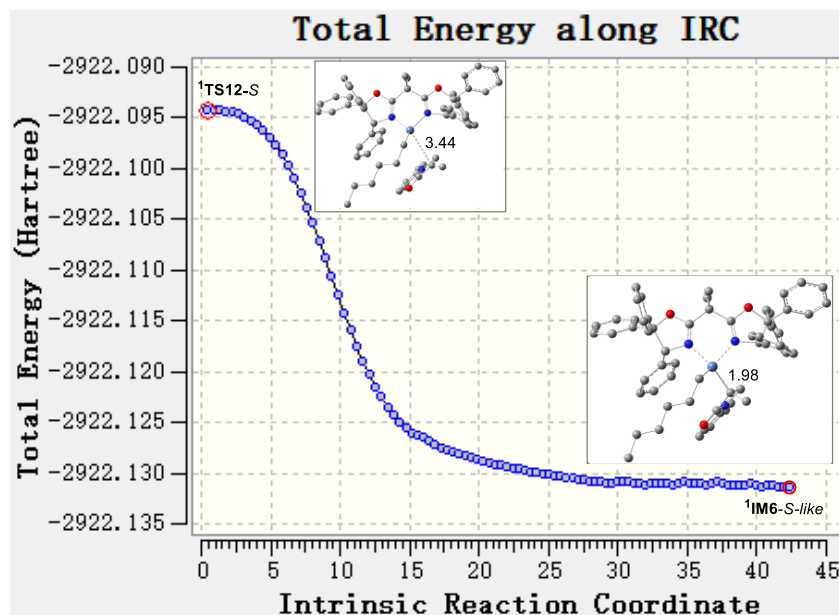

**Fig. S10.** IRC results showing that  $^1\text{TS12-S}$  connects to  $^1\text{IM6-S}$  in the forward direction. Note that the geometric optimization starting at  $^1\text{IM6-S-like}$  structure, obtained after 100 IRC steps, converged to  $^1\text{IM6-S}$ .

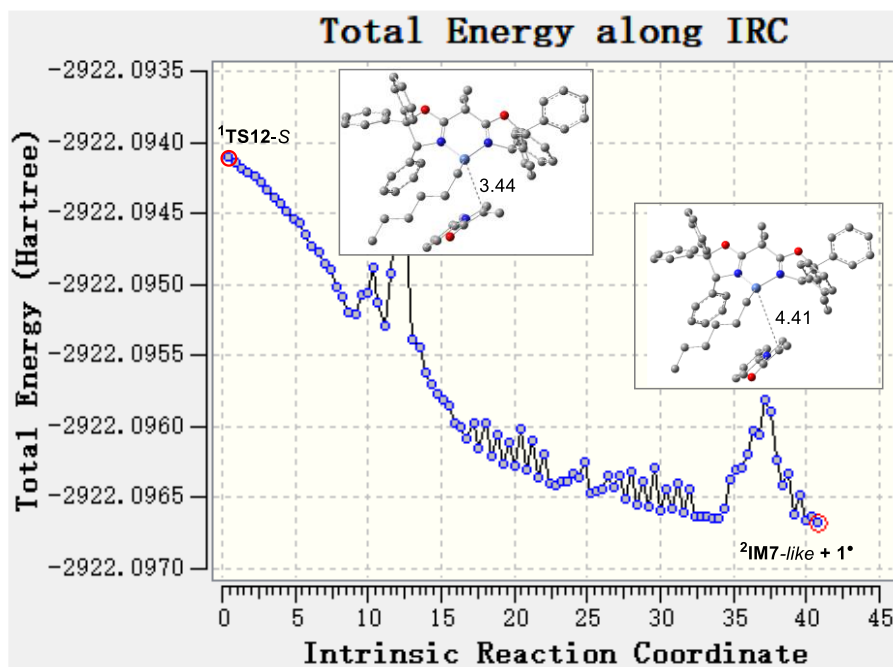

**Fig. S11.** IRC results showing that  $^1\text{TS12-S}$  connects to  $^2\text{IM7} + 1^*$  in the backward direction. Note that the geometric optimization starting at  $^2\text{IM7-like}$  structure, obtained after 100 IRC steps, converged to  $^2\text{IM7}$ .

## S17. Additional results for leading <sup>1</sup>IM6 to the product 3

In addition to the results for leading <sup>1</sup>IM6 to **3**, reported in the main text, we computed the triplet <sup>3</sup>TS10-S and <sup>3</sup>TS10-R and the transition states (<sup>3</sup>TS10-S' and <sup>3</sup>TS10-R') for S<sub>N</sub>2-like outer-sphere mechanism to form alkyl-alkyl bond. As shown in Fig. S12, these transition states are much higher than their counterparts (<sup>1</sup>TS10-S and <sup>1</sup>TS10-R), excluding these possibilities.

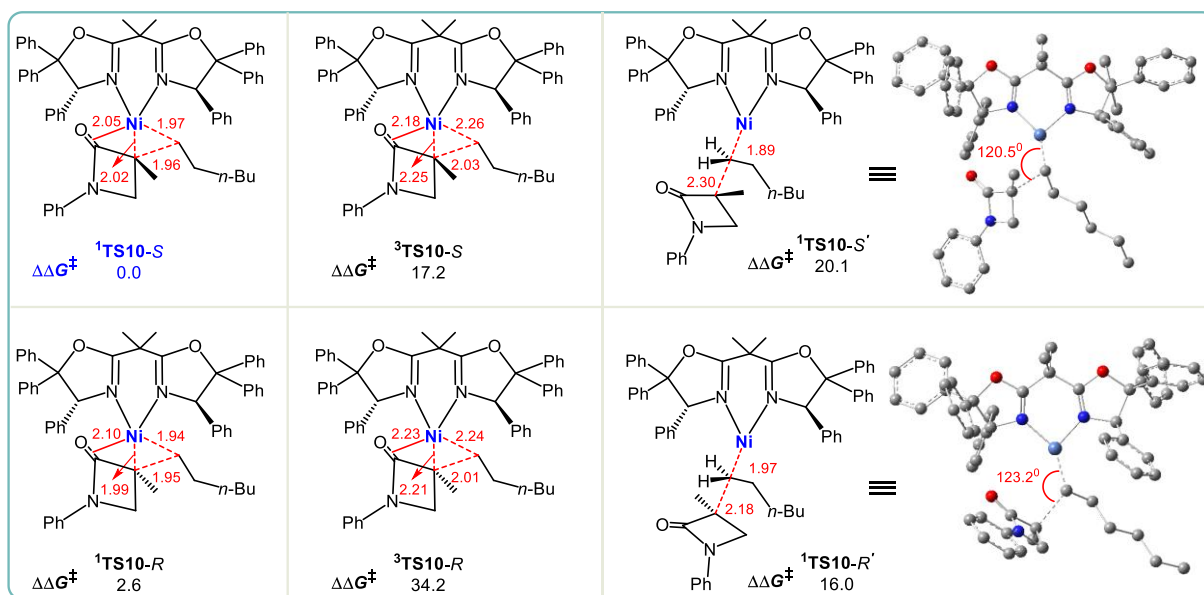

**Fig. S12.** Transition states alternative to <sup>1</sup>TS10-S and <sup>1</sup>TS10-R. Key bond lengths in red are given in angstroms.

We also considered some conformations of <sup>1</sup>IM6 manually. Examining the structure of <sup>1</sup>IM6-S, the LNi moiety is rigid without freedoms. Referring to <sup>1</sup>IM6-S, however, the Ph group of the substrate **1** may point out of the paper. We considered this scenario and obtained <sup>1</sup>IM6A-S and <sup>1</sup>IM6B-S which are higher than <sup>1</sup>IM6-S. Examining <sup>1</sup>TS10-R/<sup>1</sup>TS10-S, the transition states feature coordination between nickel and carbonyl group, which restricts the conformation of the transition states. We tried to examine other conformations of <sup>1</sup>TS10 manually by removing the coordination, however such transition states could not be located, indicating the importance of coordination of the carbonyl group.

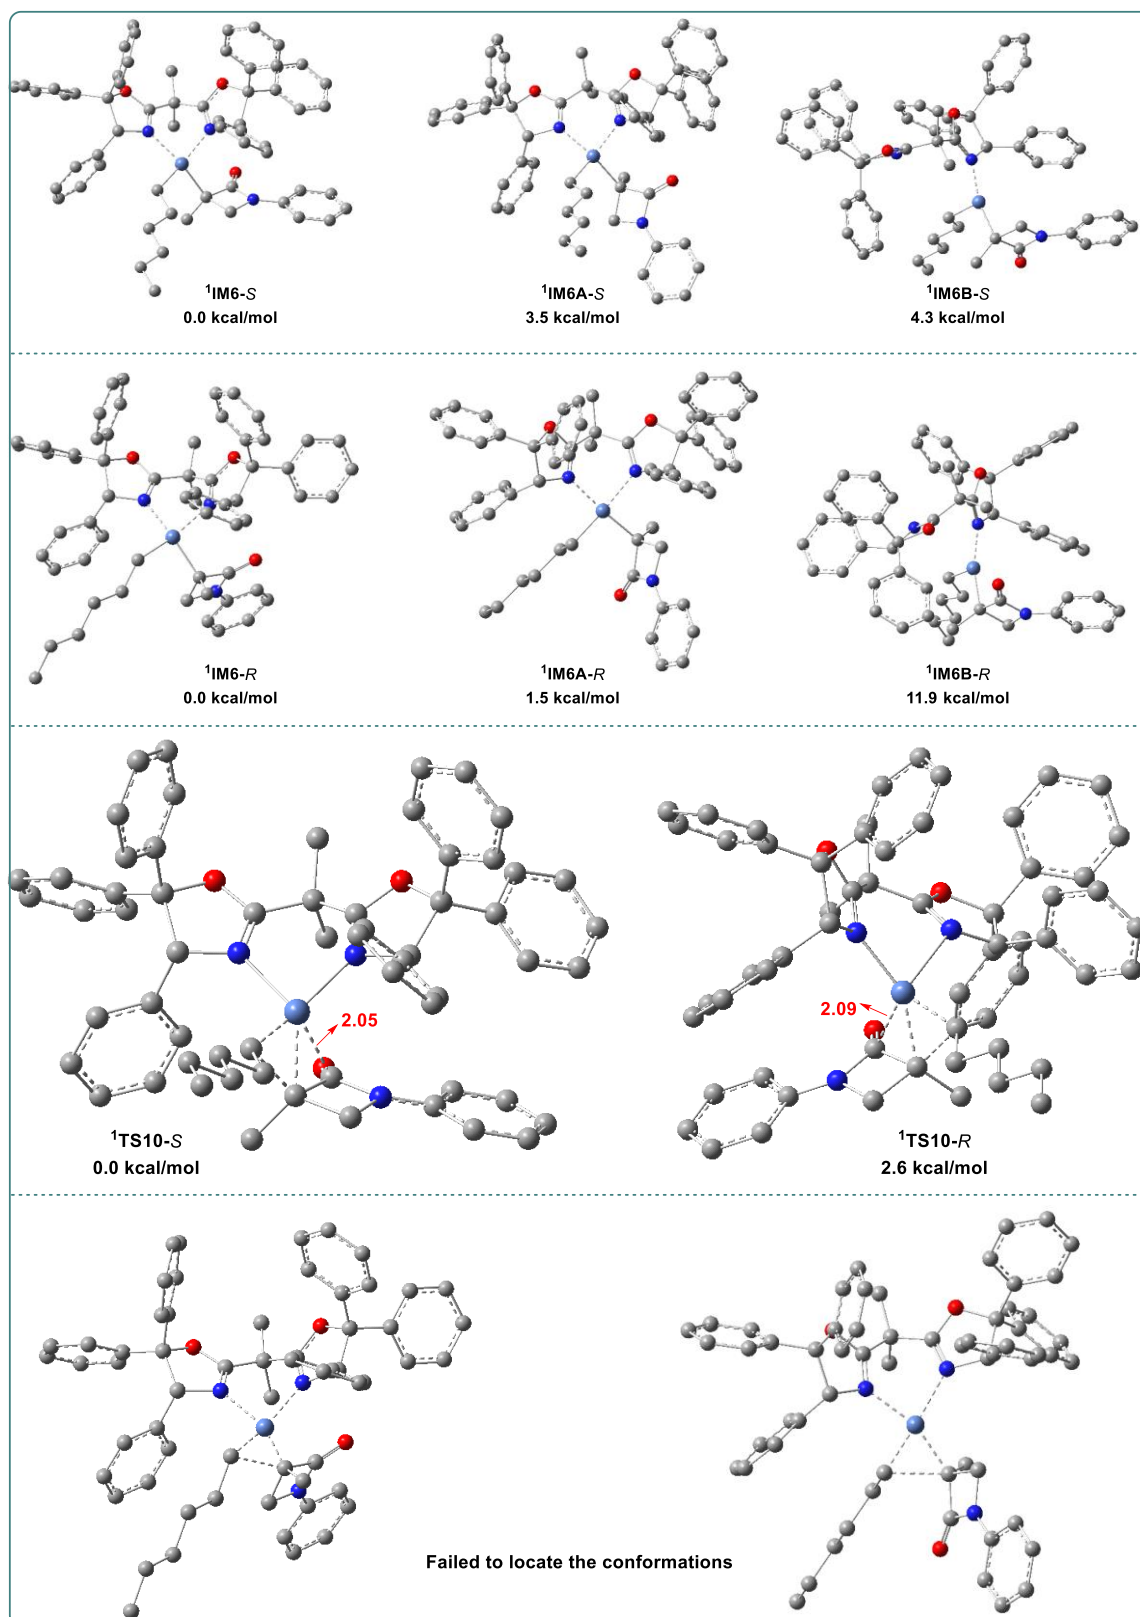

**Fig. S13.** Other conformations of  $^1\text{IM6-S}/^1\text{IM6-R}$  intermediates. The initial structures for optimizing the structures of  $^1\text{TS10-S}/^1\text{TS10-R}$ .

## SI8. Results to consider the effect of $K_3PO_4$ on ${}^2TS13-Br$

We considered whether the additive  $K_3PO_4$  could lower the barrier of  ${}^2TS13-Br$  and located a Br-transfer transition state (i.e.  $K-{}^2TS13-Br$ ) involving  $K_3PO_4$  as a mediator. Relative to separate  ${}^2[Ni^I]Br$  and  $K_3PO_4$ ,  $K-{}^2TS13-Br$  has a free energy of 13.1 kcal/mol, which is lower than  ${}^2TS13-Br$  ( $\Delta G^\ddagger = 24.2$  kcal/mol) but still higher than  ${}^2TS13$  ( $\Delta G^\ddagger = 8.6$  kcal/mol). Note that  $K_3PO_4$  is highly stabilized by  $[Si]H$  by 22.8 kcal/mol (eq S1). If taking the stabilization energy into account and using  ${}^2[Ni^I]Br + K_3PO_4@[Si]H$  complex as energy reference,  $K-{}^2TS13-Br$  has a relative energy of 35.9 kcal/mol (13.1 + 22.8), which is much higher than  ${}^2TS13$ . Thus,  $K_3PO_4$  cannot actually facilitate the Br-transfer process.

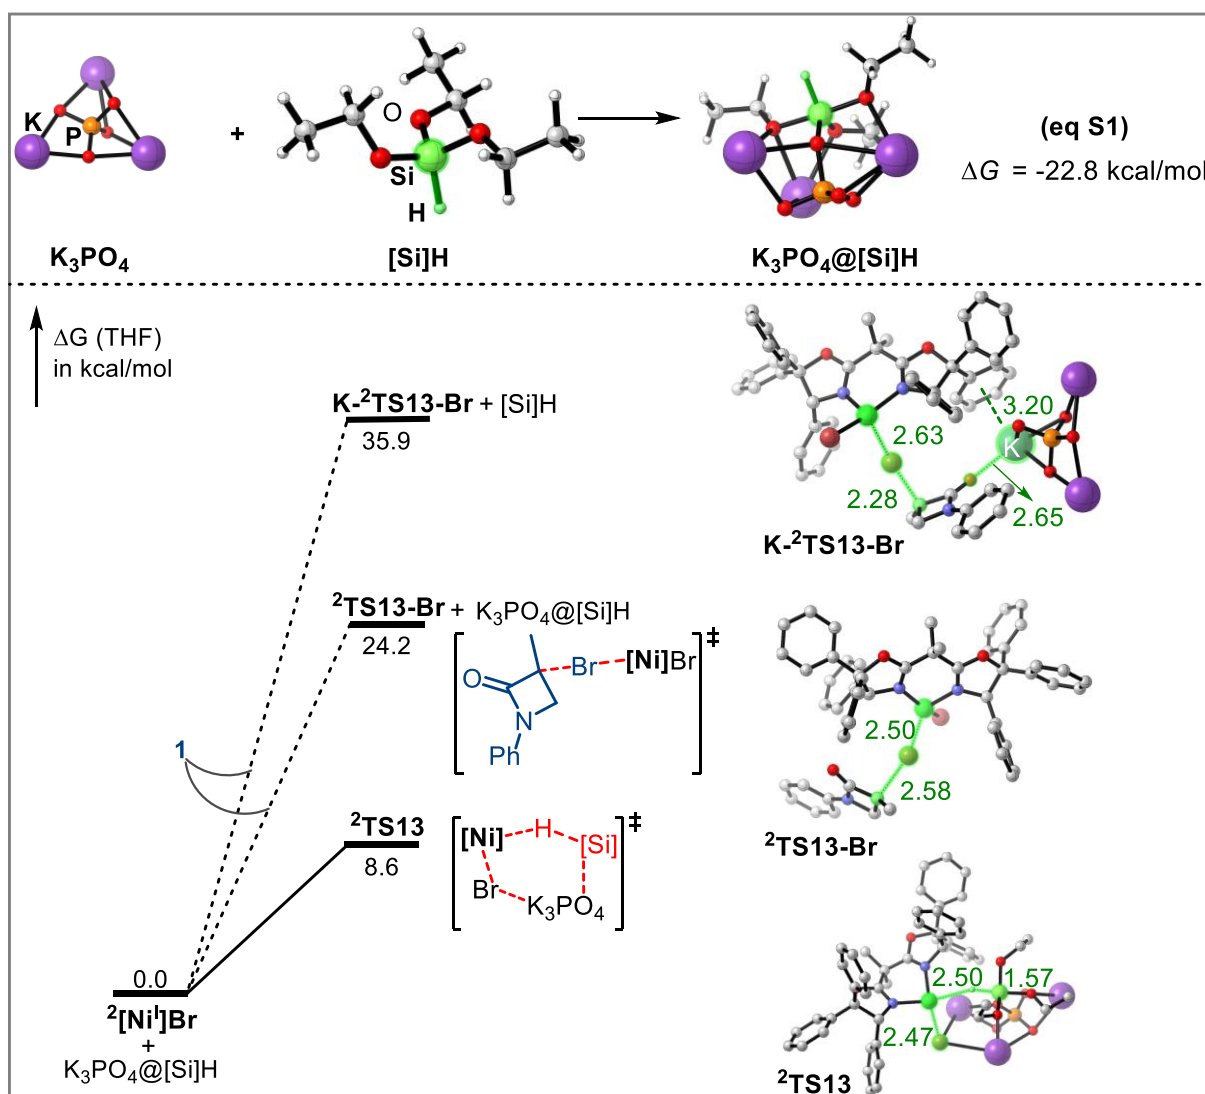

Fig. S14. Comparing the energetics for the effect of  $K_3PO_4$  to  ${}^2TS13-Br$ .



## S19. Results for potential energy surface (PES) scan

We were not able to locate the transition states for transferring the Br atom of electrophile **1** to  $^2\text{IM7}$ , thus we scanned the potential energy surface (PES) of the process ( $^2\text{IM7} + \mathbf{1}$  to  $^1\text{IM9} + \mathbf{1}$ ). As illustrated in **Fig. S15**, the PES scan started from  $^2\text{IM7} + \mathbf{1}$  (namely **P1**) and the Ni...Br bond as the reaction coordinate with an interval of 0.05 angstroms. The energy change from **P2** to **P3** indicate that, as Br gets closer to Ni center of  $^2\text{IM7}$ , the Ni–Br bond forms and C(sp<sup>3</sup>)–Br bond breaks without crossing a barrier. In addition, the geometric optimization starting at the point (**P4**) led to separate  $^1\text{IM9}$  and  $\mathbf{1}$ . These results indicate that the Br atom of **1** can easily transfer to Ni center of  $^2\text{IM7}$  without a barrier, giving  $^1\text{IM9} + \mathbf{1}$  and explain why the Br-transfer transition state could not be located.

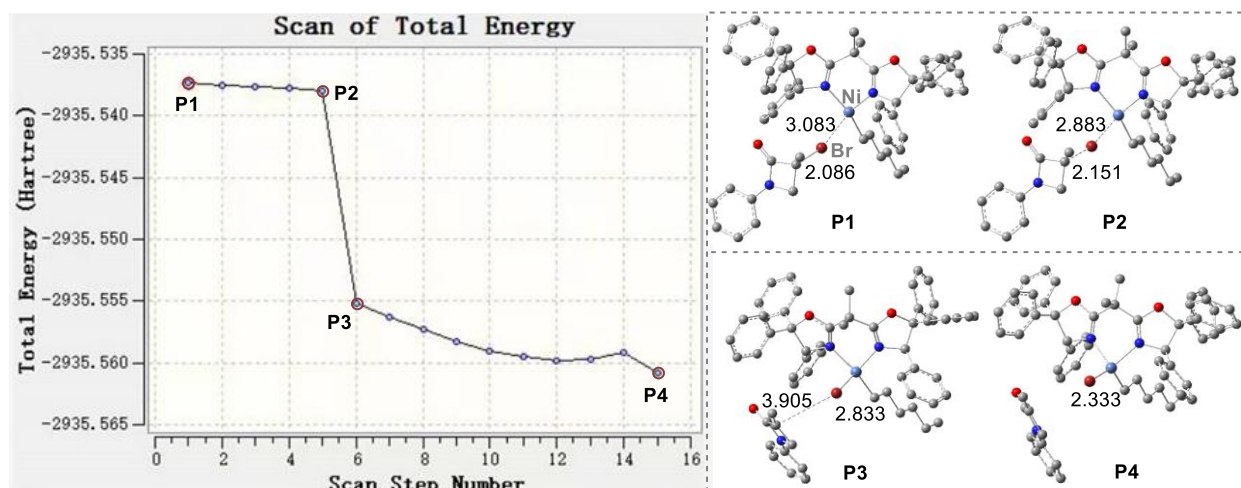

**Fig. S15.** Results for potential energy surface (PES) scan from  $^2\text{IM7} + \mathbf{1}$  to  $^1\text{IM9} + \mathbf{1}$ . Values are key bond lengths in angstroms. Trivial H atoms are omitted for clarity.

## SI10. The radical-chain mechanism in the absence of [Si]H and K<sub>3</sub>PO<sub>4</sub>

To see if our proposed cage-escape enabled mechanism to generate nickel (I) is viable, we studied the stoichiometric reaction (eq S11) reported in reference,<sup>6</sup> using the truncated **B** to model the nickel (II) species **A** for saving computational cost.

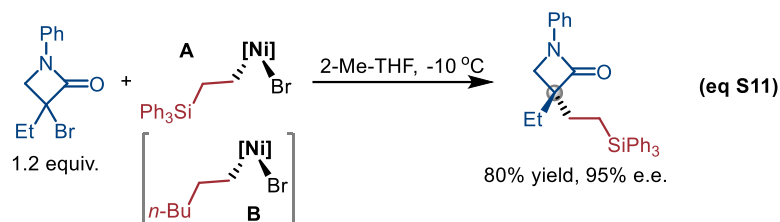

Experimentally, it was proposed that the reaction takes place catalytically, using an *in-situ* generated nickel (I) species ( $^2[\text{Ni}^{\text{I}}]\text{Br}$ ) as the active catalyst.  $^2[\text{Ni}^{\text{I}}]\text{Br}$  species is generated by comproportionation between the nickel (II) species **A** and the nickel (0) species generated from reductive elimination of **A**. On the basis of the mechanism, we computed the thermodynamics of the reductive elimination of **B**. The reductive elimination was predicted to be highly endergonic by 59.0 kcal/mol, safely ruling out the comproportionation mechanism (**Fig. S16(A)**). In the following, we proposed two alternatives to generate  $^2[\text{Ni}^{\text{I}}]\text{Br}$  (I) as described by **Fig. S16(A)**, species **B** first undergoes homolytic Ni-C bond cleavage with a barrier of 12.8 kcal/mol, giving  $^2[\text{Ni}^{\text{I}}]\text{Br}$  and alkyl radical. Then the cage-escaped alkyl radical couples with another cage-escaped alkyl radical generated from the homolytic Ni-C bond cleavage of **B**, giving the homo-coupling product **5**. The homo-coupling ( $2^*\text{B} \rightarrow 2^*\text{Ni}(\text{I})\text{-Br} + 2^*\text{}^n\text{BuCH}_2\text{CH}_2\cdot \rightarrow 2^*[\text{Ni}^{\text{I}}]\text{Br} + \text{}^n\text{BuCH}_2\text{CH}_2\text{-CH}_2\text{CH}_2\text{}^n\text{Bu}(\mathbf{5})$ ) is exergonic by 28.6 kcal/mol. The energetics indicates that, as far as the alkyl radical  $^n\text{BuCH}_2\text{CH}_2\cdot$  is able to escape the solvent cage, the mechanism could take place, giving  $^2[\text{Ni}^{\text{I}}]\text{Br}$  species as a persistently existing active catalyst. (II) As described by **Fig. S16(B)**, species **B** first undergoes homolytic Ni-C bond cleavage with a barrier of 12.8 kcal/mol, giving  $^2[\text{Ni}^{\text{I}}]\text{Br}$  and alkyl radical. Then the alkyl radical escapes from the solvent cage to associate with another **B** by crossing a barrier of 25.0 kcal/mol ( $^2\text{TS19}$ ), followed by reductive elimination via  $^2\text{TS20}$  to afford the homo-coupling product **5** and  $^2[\text{Ni}^{\text{I}}]\text{Br}$ . Although the barrier is somewhat high, we considered it to a viable pathway to generate  $^2[\text{Ni}^{\text{I}}]\text{Br}$  species. Because the comproportionation mechanism is highly unlikely, we proposed the two alternatives to be viable mechanisms for the generation of  $^2[\text{Ni}^{\text{I}}]\text{Br}$  species.

Using  $^2[\text{Ni}^{\text{I}}]\text{Br}$  as the active species, **Fig. S16(C)** shows the energy profile for the reaction of **1** and **B**. First, **1** transfers its Br atom to  $^2[\text{Ni}^{\text{I}}]\text{Br}$  via a barrier of 24.2 kcal/mol ( $^2\text{TS13-Br}$ ), giving radical

**1** and  $^3[\text{Ni}^{\text{II}}]\text{Br}_2$ . The radical **1** then associates with **B** by crossing the transition states  $^2\text{TS16}$ , followed by reductive elimination via  $^2\text{TS17}$  to afford **3**. The radical association with **B** is the enantioselectivity-determining step and the energy difference (4.3 kcal/mol) between  $\text{TS16-R}$  than  $\text{TS16-S}$  are in reasonable agreement with the experimentally observed enantioselectivity.

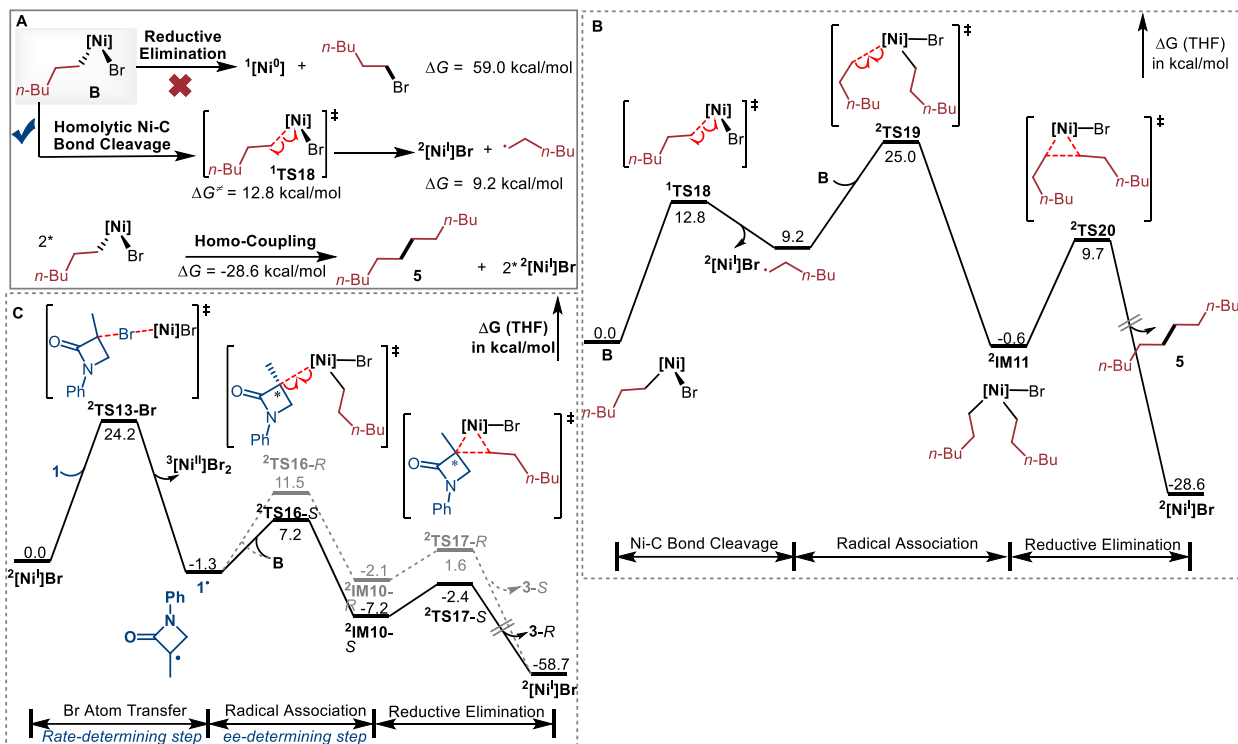

**Fig. S16.** Energetic results (in kcal/mol) for the two viable mechanisms to generate nickel (I) species  $^2[\text{Ni}^{\text{I}}]\text{Br}$  (A and B). (C) Energy profiles for the coupling reaction of eq S11 with  $^2[\text{Ni}^{\text{I}}]\text{Br}$  as the active catalyst.

## SI11. Energetic results of the key processes with a secondary alkyl bromide as the electrophile

In our computed model reaction eq 6 in the main text, the electrophile is a tertiary alkyl bromide **1**. Experimentally, secondary alkyl bromides bearing a carbonyl group were also found to be a class of eligible electrophiles.<sup>6</sup> On the basis of our proposed mechanism, we examined the energetics of the key processes related to **1IM4** and **1IM6** in Ni(0)/Ni(II) cycle and **2IM7** in Ni(I)/Ni(II)/Ni(III) cycle, using a secondary alkyl bromide **1c** in eq S12.

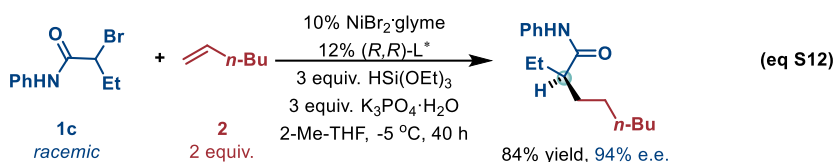

Because **1IM4** is a key intermediate for generating Ni(I)-Br species via cage effect, we calculated the energetics of the processes starting from **1IM4**<sup>1c</sup> (Fig. S17). As compared, the energy difference (14.2 kcal/mol) between **1IM4**<sup>1c</sup> and **1TS8**<sup>1c</sup> is comparable with that (14.8 kcal/mol) between **1IM4** and **1TS8**. Thus, **1IM4**<sup>1c</sup> and **1IM4** should behave similarly in terms of the competition between giving Ni(I)-Br via cage effect and undergoing hydride transfer.

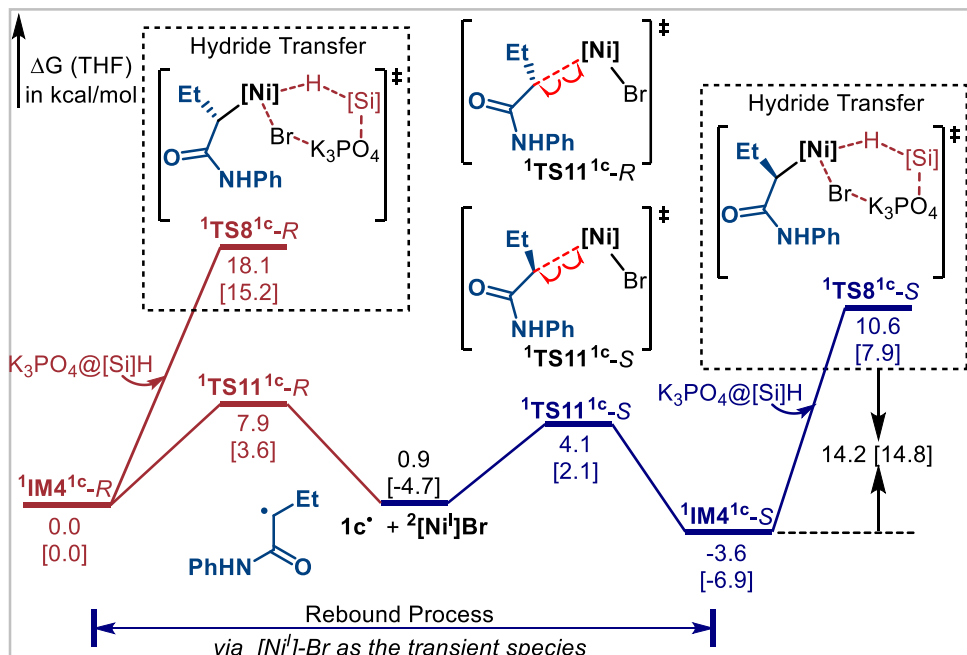

**Fig. S17.** Comparing the energetic results (in kcal/mol) of the processes of **1IM4**<sup>1c</sup> and **1IM4**. The values in the square brackets are the corresponding values of the tertiary alkyl bromide (**1**).

We next considered the processes related to the reductive elimination intermediates (e.g.  $^1\text{IM6}$ ). The results in Fig. S18 indicate that  $^1\text{IM6}^{1c}$  is more difficult than  $^1\text{IM6}$  to undergo reductive elimination, because the barrier (28.5 kcal/mol) of the former is higher than that (26.6 kcal/mol) of the latter. According to the results, we reason that the Ni(I) cycle is more preferable for secondary alkyl bromide **1c** than for tertiary alkyl bromide **1**.

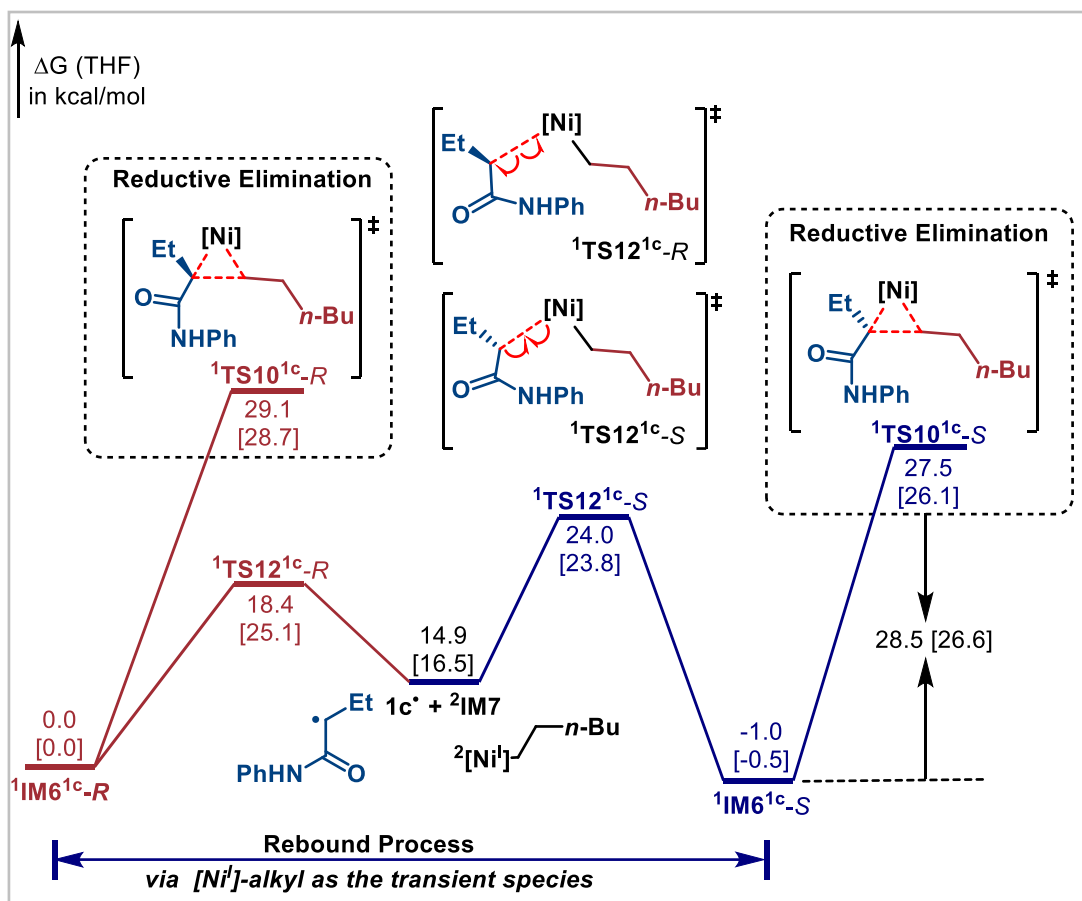

**Fig. S18.** Comparing the energetic results (in kcal/mol) of the processes of  $^1\text{IM6}^{1c}$  and  $^1\text{IM6}$ . The values in the square brackets are the corresponding values of the tertiary alkyl bromide (**1**).

Examining the pathway of the Ni(I) cycle in Figure 4 in the main text, the processes from  $^2[\text{Ni}^{\text{I}}]\text{Br}$  to  $^2\text{IM7}$  are not related to alkyl bromide substrate. The radical addition barriers from  $\mathbf{1}^\bullet + ^1\text{IM9}$  to  $^2\text{TS16}$  is significantly higher than the reductive elimination barriers of the Ni(III) intermediates  $^2\text{IM10}$  via  $^2\text{TS17}$ . Therefore, we calculated the radical addition barriers of the secondary alkyl bromide **1c**. The radical addition barrier (9.3 kcal/mol from  $\mathbf{1c}^\bullet + ^1\text{IM9}$  to  $^2\text{TS16}^{1c-S}$ ) is comparable to that of tertiary alkyl bromide **1** (8.5 kcal/mol from  $\mathbf{1}^\bullet + ^1\text{IM9}$  to  $^2\text{TS16-S}$ ) (see Fig. S19). Thus, in the case of **1c**, the radical addition also take place easily. In addition, the barrier difference (1.9 kcal/mol) between  $^2\text{TS16}^{1c-R}$  and  $^2\text{TS16}^{1c-S}$  also

agrees with the high enantioselectivity of the substrate. The predicted *ee* value 96:4 is in good agreement with the experimental value of 97:3.

The detailed results presented above explain why the secondary alkyl bromides are also eligible electrophiles for the coupling reactions.

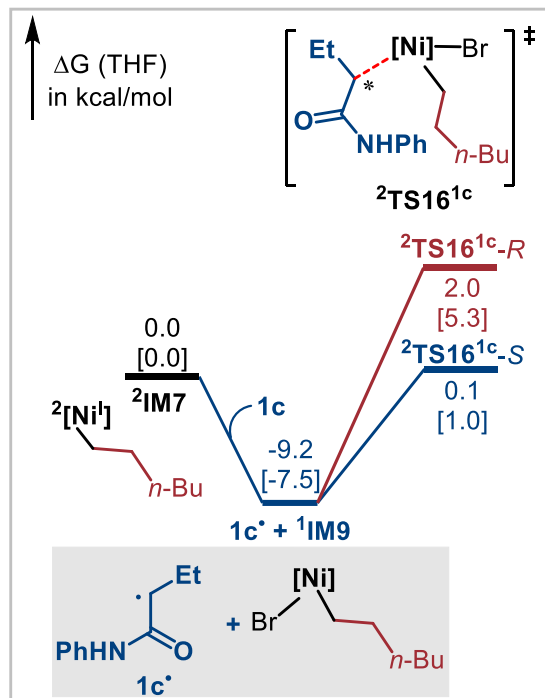

**Fig. S19.** Comparing the energetic results (in kcal/mol) of the processes starting from  ${}^2\text{IM7}$ . The values in the square brackets are the corresponding values of the tertiary alkyl bromide (**1**).

## SI12. References

- [1] (a) K. S. Chan, X. Z. Li, W. I. Dzik, B. de Bruin, *J. Am. Chem. Soc.* 2008, **130**, 2051; (b) Q. Knijnenburg, D. Hetterscheid, T. M. Kooistra, P. H. M. Budzelaar, *Eur. J. Inorg. Chem.* 2004, **2004**, 1204; (c) X. Zhang, Z. Ke, N. J. DeYonker, H. Xu, Z. F. Li, X. Xu, X. Zhang, C. Y. Su, D. L. Phillips, C. Zhao, *J. Org. Chem.* 2013, **78**, 12460.
- [2] Y. He, C. Liu, L. Yu, S. Zhu, *Angew. Chem. Int. Ed.* 2020, **59**, 21530.
- [3] Y. Zhang, B. Han, S. Zhu, *Angew. Chem., Int. Ed.* 2019, **58**, 13860.
- [4] F. Zhou, J. Zhu, Y. Zhang, S. Zhu, *Angew. Chem., Int. Ed.* 2018, **57**, 4058.
- [5] F. Chen, X. Xu, Y. He, G. Huang, S. Zhu, *Angew. Chem., Int. Ed.* 2020, **59**, 5398.
- [6] Z. Wang, H. Yin, G. C. Fu, *Nature*. 2018, **563**, 379.

**SI13. Cartesian coordinates in Å, SCF energies and free energies (in a.u.) at 298.15 K and 1 atm for the optimized structures [BSI= 6-31G(d,p), BSII=6-311++G(d,p)]**

**<sup>1</sup>NiBr<sub>2</sub>·glyme**

|                                                   |    |           |           |           |
|---------------------------------------------------|----|-----------|-----------|-----------|
| B3LYP/BSI SCF energy: -506.697496a.u.             | C  | 1.224221  | 1.095228  | 2.425982  |
| M06/BSII SCF energy in solution: -506.539596a.u.  | H  | 0.923102  | 0.176982  | 2.929244  |
| M06/BSII free energy in solution: -506.435723a.u. | H  | 1.126754  | 1.943589  | 3.111347  |
|                                                   | H  | 2.252027  | 1.001759  | 2.063378  |
| C                                                 | O  | 0.313833  | 1.275062  | 1.323939  |
| H                                                 | C  | 0.542494  | 2.472621  | 0.565452  |
| H                                                 | H  | 0.415893  | 3.346704  | 1.215836  |
| H                                                 | H  | 1.560062  | 2.461730  | 0.154916  |
| O                                                 | C  | -0.487821 | 2.492974  | -0.544534 |
| C                                                 | H  | -0.332825 | 3.366684  | -1.189253 |
| H                                                 | H  | -1.505227 | 2.513571  | -0.133811 |
| H                                                 | O  | -0.298638 | 1.293676  | -1.310965 |
| C                                                 | C  | -1.222082 | 1.145144  | -2.406558 |
| H                                                 | H  | -1.108646 | 1.995641  | -3.086793 |
| H                                                 | H  | -0.948776 | 0.223112  | -2.918659 |
| O                                                 | H  | -2.248994 | 1.075243  | -2.036177 |
| C                                                 | Ni | -0.004078 | -0.301521 | -0.001734 |
| H                                                 | Br | -2.221150 | -1.041871 | 0.435028  |
| H                                                 | Br | 2.207390  | -1.056647 | -0.446666 |
| H                                                 |    |           |           |           |
| Ni                                                |    |           |           |           |
| Br                                                |    |           |           |           |
| Br                                                |    |           |           |           |

**glyme**

B3LYP/BSI SCF energy: -308.86377a.u.  
M06/BSII SCF energy in solution: -308.750078a.u.  
M06/BSII free energy in solution: -308.640059a.u.

**<sup>3</sup>NiBr<sub>2</sub>·glyme**

|                                                   |   |           |           |          |
|---------------------------------------------------|---|-----------|-----------|----------|
| B3LYP/BSI SCF energy: -506.722892a.u.             | C | -1.233960 | -2.715758 | 0.000000 |
| M06/BSII SCF energy in solution: -506.564481a.u.  | H | -2.276964 | -3.041925 | 0.000000 |
| M06/BSII free energy in solution: -506.461159a.u. | H | -0.733323 | -3.125576 | 0.891798 |



H -0.733323 -3.125576 -0.891798  
 O -1.233960 -1.305091 0.000000  
 C 0.068864 -0.757412 0.000000  
 H 0.637666 -1.077575 0.888375  
 H 0.637666 -1.077575 -0.888375  
 C -0.068864 0.757412 0.000000  
 H -0.637666 1.077575 0.888375  
 H -0.637666 1.077575 -0.888375  
 O 1.233960 1.305091 0.000000  
 C 1.233960 2.715758 0.000000  
 H 0.733323 3.125576 0.891798  
 H 2.276964 3.041925 0.000000  
 H 0.733323 3.125576 -0.891798

**(R,R)-L\***

B3LYP/BSI SCF energy: -1997.628056a.u.

M06/BSII SCF energy in solution: -1996.663378a.u.

M06/BSII free energy in solution: -1996.028855a.u.

C 1.255352 -1.143031 -0.110156  
 N 1.306324 -0.471289 0.966668  
 O 2.395712 -1.284708 -0.844098  
 C 3.492512 -0.707449 -0.064424  
 C 2.685031 -0.008247 1.141346  
 H 3.055076 -0.431663 2.079323  
 C 2.774725 1.505776 1.262079  
 C 3.926596 2.097217 1.798535  
 C 1.709913 2.330208 0.884014  
 C 4.021695 3.480893 1.937918  
 H 4.760696 1.473026 2.110070  
 C 1.800052 3.715979 1.029973  
 H 0.800345 1.880535 0.501002

C 2.955636 4.296744 1.552431  
 H 4.923994 3.920812 2.353662  
 H 0.956013 4.336829 0.743893  
 H 3.024161 5.375022 1.666839  
 C -1.207399 -1.225782 -0.109421  
 N -1.944316 -1.666866 0.824847  
 O -1.557760 -0.049937 -0.712862  
 C -2.842493 0.365126 -0.148089  
 C -2.985728 -0.661826 1.074110  
 H -2.695589 -0.129150 1.986967  
 C -4.340503 -1.300418 1.318502  
 C -5.141692 -0.876995 2.384949  
 C -4.799353 -2.351758 0.513539  
 C -6.385732 -1.464318 2.627081  
 H -4.783824 -0.094255 3.049796  
 C -6.037962 -2.943085 0.753372  
 H -4.175238 -2.710698 -0.297959  
 C -6.839380 -2.497441 1.807758  
 H -6.991169 -1.121837 3.461629  
 H -6.377814 -3.756722 0.118664  
 H -7.804338 -2.960158 1.994566  
 C 0.045397 -1.892979 -0.646451  
 C 0.128557 -3.344145 -0.117715  
 H 1.069718 -3.799812 -0.437338  
 H 0.070336 -3.359063 0.971102  
 H -0.702637 -3.934601 -0.512096  
 C 0.037769 -1.887431 -2.191487  
 H -0.827038 -2.449212 -2.557075  
 H -0.015641 -0.871661 -2.588994  
 H 0.942946 -2.362332 -2.573674  
 C -2.709234 1.832119 0.260908  
 C -1.981347 2.703992 -0.562979

C -3.350594 2.358005 1.387645  
C -1.889608 4.061370 -0.259308  
H -1.486908 2.311106 -1.444662  
C -3.262733 3.719450 1.690738  
H -3.932762 1.712562 2.036010  
C -2.530828 4.576004 0.870719  
H -1.322559 4.719694 -0.911707  
H -3.767549 4.105383 2.571747  
H -2.461930 5.634037 1.106161  
C -3.914769 0.224529 -1.238024  
C -5.194620 0.763767 -1.039470  
C -3.649081 -0.435938 -2.442712  
C -6.183277 0.632560 -2.011849  
H -5.421826 1.291064 -0.119253  
C -4.639507 -0.563446 -3.420390  
H -2.660811 -0.838254 -2.625168  
C -5.910557 -0.032637 -3.209406  
H -7.168112 1.055232 -1.834405  
H -4.409674 -1.076344 -4.350367  
H -6.680150 -0.130612 -3.969688  
C 4.252169 0.243077 -0.991513  
C 5.635868 0.429087 -0.884257  
C 3.552937 0.973932 -1.963099  
C 6.302308 1.328548 -1.718750  
H 6.203780 -0.136236 -0.153879  
C 4.219058 1.867465 -2.799842  
H 2.483662 0.834341 -2.071521  
C 5.597822 2.051162 -2.680386  
H 7.376656 1.455225 -1.618709  
H 3.658111 2.420580 -3.547973  
H 6.116717 2.747275 -3.333145  
C 4.364009 -1.873874 0.415965

C 4.457378 -3.035620 -0.364154  
C 5.120544 -1.801727 1.593139  
C 5.268029 -4.099066 0.031098  
H 3.884694 -3.102999 -1.282033  
C 5.939928 -2.862735 1.985887  
H 5.081391 -0.914352 2.217408  
C 6.013350 -4.018013 1.208797  
H 5.318373 -4.992622 -0.584790  
H 6.515270 -2.783786 2.903887  
H 6.644535 -4.846388 1.517054

### 1 (racemic)

B3LYP/BSI SCF energy: -530.441115a.u.

M06/BSII SCF energy in solution: -530.189813a.u.

M06/BSII free energy in solution: -530.049393a.u.

C 0.429134 0.957885 0.278642  
C 0.426499 -1.124757 0.651975  
H 0.203750 -1.584303 1.622219  
H 0.554991 -1.896281 -0.110840  
N -0.513379 -0.056255 0.275584  
O 0.363762 2.147694 0.077961  
C -1.899295 -0.083545 0.069056  
C -2.590807 -1.298963 0.168746  
C -2.590828 1.100468 -0.238388  
C -3.969452 -1.328407 -0.038330  
H -2.054626 -2.213682 0.402399  
C -3.967241 1.050016 -0.442119  
H -2.042512 2.031921 -0.312683  
C -4.664275 -0.157628 -0.343969  
H -4.499161 -2.273400 0.039142  
H -4.499703 1.966231 -0.680328

H -5.737464 -0.184860 -0.505172  
C 2.232878 0.234503 2.014907  
H 2.805744 1.162420 1.957156  
H 2.906314 -0.583522 2.282857  
H 1.481321 0.343107 2.806474  
C 1.533628 -0.035874 0.700514  
Br 2.912099 -0.269645 -0.770863

## 2

B3LYP/BSI SCF energy: -235.861282a.u.  
M06/BSII SCF energy in solution: -235.711483a.u.  
M06/BSII free energy in solution: -235.577941a.u.

C 3.090082 -0.171647 -0.439429  
H 3.976968 -0.775157 -0.269103  
H 3.097908 0.468005 -1.319380  
C 2.045307 -0.207728 0.388216  
H 2.082860 -0.867419 1.257073  
C 0.777284 0.584811 0.224896  
H 0.863494 1.243062 -0.649045  
H 0.644430 1.241259 1.098343  
C -0.474686 -0.301846 0.086018  
H -0.360092 -0.947735 -0.794707  
H -0.539236 -0.976516 0.951535  
C -1.776312 0.501067 -0.029453  
H -1.709243 1.176549 -0.893188  
H -1.881659 1.147353 0.852789  
C -3.020046 -0.382626 -0.167607  
H -2.958870 -1.016547 -1.059580  
H -3.931406 0.218782 -0.249545  
H -3.134934 -1.043826 0.698957

## H[Si]

B3LYP/BSI SCF energy: -753.572857a.u.  
M06/BSII SCF energy in solution: -753.394784a.u.  
M06/BSII free energy in solution: -753.217302a.u.

Si -0.016028 -0.035900 -0.782168  
O -1.548380 -0.596412 -0.570616  
O 0.017197 1.541798 -0.310812  
C -2.314172 -0.429536 0.628636  
H -2.327471 0.630411 0.910365  
H -1.839982 -0.986019 1.448844  
C -3.725359 -0.939795 0.388292  
H -4.331021 -0.827174 1.293816  
H -4.202811 -0.379593 -0.420963  
H -3.710738 -1.997778 0.109859  
C 1.199914 2.303704 -0.054453  
H 1.868482 1.740131 0.607725  
H 1.736788 2.480388 -0.997653  
C 0.806374 3.628507 0.578916  
H 0.281804 3.460745 1.524311  
H 1.695932 4.235476 0.778111  
H 0.143751 4.191005 -0.085429  
O 1.123105 -0.815020 0.134184  
C 1.520971 -2.169556 -0.084839  
H 0.747737 -2.846057 0.303984  
H 1.619198 -2.370083 -1.162105  
C 2.845360 -2.422061 0.618084  
H 2.752262 -2.226763 1.690495  
H 3.160091 -3.461885 0.480335  
H 3.624857 -1.767179 0.217336  
H 0.271622 -0.243530 -2.218556

**K<sub>3</sub>PO<sub>4</sub>**

B3LYP/BSI SCF energy: -2442.201991a.u.

M06/BSII SCF energy in solution: -2442.261433a.u.

M06/BSII free energy in solution: -2442.281698a.u.

O 0.925403 -0.000109 1.253608  
P -0.033792 0.000019 0.000772  
O -0.931601 1.298812 0.001451  
O -0.931675 -1.298726 0.001282  
O 0.923337 0.000057 -1.253716  
K -3.047048 0.000091 -0.000585  
K 1.539819 -2.284845 -0.000564  
K 1.540027 2.284725 -0.000566

**THF**

B3LYP/BSI SCF energy: -232.456281 a.u.

M06/BSII SCF energy in solution: -232.3549a.u.

M06/BSII free energy in solution: -232.266509 a.u.

C 0.733046 0.996862 0.227024  
C 1.165695 -0.430366 -0.131454  
C -1.165132 -0.431138 0.132539  
C -0.734007 0.996026 -0.227512  
H 0.795336 1.155249 1.309712  
H 1.342957 1.761316 -0.262625  
H 1.949926 -0.821002 0.527375  
H 1.537363 -0.481135 -1.166625  
H -1.950588 -0.822730 -0.524210  
H -1.534358 -0.481454 1.168653  
H -0.796527 1.153084 -1.310381  
H -1.344536 1.760475 0.261381  
O 0.000352 -1.251514 -0.000857

**<sup>1</sup>[Ni<sup>II</sup>]Br<sub>2</sub>**

B3LYP/BSI SCF energy: -2195.489146a.u.

M06/BSII SCF energy in solution: -2194.48696825a.u.

M06/BSII free energy in solution: -2193.856965a.u.

C 1.260515 -0.087939 -1.225850  
N 1.399783 -0.090208 0.051560  
O 2.384416 -0.164194 -1.954536  
C 3.483478 -0.528282 -1.012102  
C 2.858468 -0.065822 0.353946  
H 3.052142 -0.804133 1.129295  
C 3.258863 1.294601 0.899191  
C 3.871261 1.366294 2.155554  
C 3.006920 2.483181 0.199649  
C 4.237923 2.598972 2.698430  
H 4.038966 0.454642 2.721452  
C 3.372110 3.714484 0.740349  
H 2.529164 2.451680 -0.775101  
C 3.990708 3.775239 1.991634  
H 4.703389 2.637448 3.678706  
H 3.172455 4.627144 0.186219  
H 4.269497 4.735754 2.415081  
C -1.262284 0.088012 -1.231928  
N -1.400883 0.063461 0.045312  
O -2.383327 0.198649 -1.959176  
C -3.475760 0.561150 -1.006482  
C -2.859497 0.052001 0.346571  
H -3.044971 0.770270 1.142597  
C -3.283022 -1.317034 0.850923  
C -3.904029 -1.414841 2.101152  
C -3.046079 -2.488915 0.118988

|    |           |           |           |    |           |           |           |
|----|-----------|-----------|-----------|----|-----------|-----------|-----------|
| C  | -4.294692 | -2.656279 | 2.605854  | C  | -4.357308 | 4.030343  | -2.349828 |
| H  | -4.059727 | -0.517426 | 2.692589  | H  | -4.780520 | 1.997114  | -2.893395 |
| C  | -3.434945 | -3.729061 | 0.621583  | C  | -3.036802 | 4.337973  | -0.356992 |
| H  | -2.560599 | -2.437541 | -0.851046 | H  | -2.406386 | 2.574618  | 0.667167  |
| C  | -4.062539 | -3.815633 | 1.866800  | C  | -3.733581 | 4.881645  | -1.434681 |
| H  | -4.766734 | -2.715219 | 3.581972  | H  | -4.904855 | 4.440899  | -3.193405 |
| H  | -3.246257 | -4.628590 | 0.042681  | H  | -2.548128 | 4.986417  | 0.364168  |
| H  | -4.359768 | -4.783212 | 2.260614  | H  | -3.794099 | 5.958886  | -1.560412 |
| C  | 0.000320  | -0.004262 | -2.060925 | C  | 4.746574  | 0.208549  | -1.420876 |
| C  | -0.087730 | -1.281343 | -2.944712 | C  | 5.917732  | -0.011710 | -0.681279 |
| H  | 0.811271  | -1.362616 | -3.557686 | C  | 4.784811  | 1.088085  | -2.506660 |
| H  | -0.167197 | -2.180855 | -2.327733 | C  | 7.098491  | 0.647959  | -1.013533 |
| H  | -0.961693 | -1.219637 | -3.595774 | H  | 5.905731  | -0.705119 | 0.154598  |
| C  | 0.091814  | 1.257956  | -2.964286 | C  | 5.972495  | 1.743515  | -2.842930 |
| H  | -0.804510 | 1.329402  | -3.582164 | H  | 3.888672  | 1.259153  | -3.091416 |
| H  | 0.168191  | 2.167633  | -2.361827 | C  | 7.130356  | 1.529225  | -2.097388 |
| H  | 0.968611  | 1.186656  | -3.610182 | H  | 7.995265  | 0.471098  | -0.427140 |
| Ni | 0.014750  | 0.003680  | 1.489837  | H  | 5.987506  | 2.422163  | -3.690994 |
| C  | -4.753762 | -0.137956 | -1.434399 | H  | 8.052064  | 2.040834  | -2.358348 |
| C  | -5.920138 | 0.087167  | -0.688720 | C  | 3.630850  | -2.051701 | -1.139681 |
| C  | -4.810319 | -0.987143 | -2.543297 | C  | 4.344457  | -2.570045 | -2.233012 |
| C  | -7.114559 | -0.537981 | -1.038315 | C  | 3.006711  | -2.948291 | -0.258772 |
| H  | -5.893789 | 0.757478  | 0.165455  | C  | 4.440726  | -3.944620 | -2.437307 |
| C  | -6.011656 | -1.607650 | -2.896883 | H  | 4.832566  | -1.890734 | -2.924135 |
| H  | -3.917778 | -1.161671 | -3.132529 | C  | 3.108594  | -4.327112 | -0.465119 |
| C  | -7.164927 | -1.388710 | -2.145610 | H  | 2.437990  | -2.601863 | 0.598641  |
| H  | -8.007500 | -0.358013 | -0.447030 | C  | 3.824039  | -4.830170 | -1.550313 |
| H  | -6.040808 | -2.262961 | -3.762735 | H  | 5.002370  | -4.323458 | -3.286452 |
| H  | -8.097290 | -1.873272 | -2.419987 | H  | 2.624689  | -5.002623 | 0.234086  |
| C  | -3.591760 | 2.090029  | -1.095612 | H  | 3.904216  | -5.902536 | -1.703798 |
| C  | -4.286608 | 2.649526  | -2.180767 | Br | -1.141534 | 1.364467  | 3.103739  |
| C  | -2.960519 | 2.952566  | -0.186277 | Br | 1.132667  | -1.506327 | 3.004764  |

<sup>3</sup>[Ni<sup>II</sup>]Br<sub>2</sub>

B3LYP/BSI SCF energy: -2195.517076a.u.

M06/BSII SCF energy in solution: -2194.509113a.u.

M06/BSII free energy in solution: -2193.881203a.u.

C 1.270381 -0.100976 -1.153597

N 1.420178 -0.111460 0.119983

O 2.386136 -0.153906 -1.894681

C 3.524508 -0.456689 -0.985584

C 2.866188 -0.178065 0.435619

H 3.020950 -1.047721 1.075859

C 3.325493 1.044422 1.207740

C 4.076690 0.866054 2.374747

C 3.007944 2.344831 0.797110

C 4.516222 1.965721 3.113145

H 4.310169 -0.140063 2.714138

C 3.443936 3.444056 1.533599

H 2.409148 2.501907 -0.094700

C 4.201681 3.257585 2.692241

H 5.092355 1.810825 4.020564

H 3.185777 4.447284 1.207655

H 4.535232 4.115624 3.268493

C -1.268265 0.082608 -1.161043

N -1.440194 -0.048861 0.103058

O -2.355875 0.370793 -1.890380

C -3.449266 0.723958 -0.942786

C -2.878647 0.135565 0.413835

H -2.953612 0.889610 1.197797

C -3.490113 -1.145687 0.950129

C -4.199091 -1.106213 2.155972

C -3.348653 -2.370674 0.286003

C -4.769173 -2.265599 2.684280

H -4.294782 -0.165039 2.691260

C -3.914809 -3.529327 0.812587

H -2.786998 -2.425290 -0.641438

C -4.628918 -3.479459 2.012295

H -5.310392 -2.219888 3.624660

H -3.792023 -4.473852 0.290944

H -5.063887 -4.385151 2.424701

C -0.002717 -0.089272 -1.981247

C -0.100967 -1.463289 -2.709442

H 0.783132 -1.613135 -3.331818

H -0.164349 -2.281949 -1.987445

H -0.989682 -1.477779 -3.344537

C 0.091843 1.057555 -3.022176

H -0.792630 1.051536 -3.659631

H 0.152326 2.032685 -2.530110

H 0.979998 0.918594 -3.640120

Ni -0.026499 -0.280359 1.535185

C -4.736383 0.075551 -1.425000

C -5.917748 0.304092 -0.703900

C -4.784465 -0.733398 -2.563908

C -7.117382 -0.276675 -1.107694

H -5.898684 0.941573 0.174955

C -5.990347 -1.310667 -2.971428

H -3.881333 -0.908932 -3.136236

C -7.158400 -1.087657 -2.244877

H -8.021589 -0.094037 -0.534594

H -6.011178 -1.935073 -3.860064

H -8.094564 -1.538382 -2.560895

C -3.516443 2.258375 -0.968709

C -4.293637 2.896953 -1.948412

C -2.741270 3.050595 -0.107338

C -4.310941 4.286603 -2.054171  
 H -4.892373 2.302798 -2.630053  
 C -2.762150 4.443248 -0.214586  
 H -2.110111 2.610221 0.657998  
 C -3.547241 5.066510 -1.183713  
 H -4.925031 4.758797 -2.815705  
 H -2.160789 5.034554 0.469625  
 H -3.565400 6.149905 -1.260597  
 C 4.679972 0.467935 -1.334765  
 C 5.894683 0.320127 -0.648587  
 C 4.573500 1.459789 -2.313945  
 C 6.973891 1.154257 -0.929523  
 H 5.996765 -0.453665 0.106092  
 C 5.659050 2.292902 -2.598661  
 H 3.644351 1.580655 -2.857994  
 C 6.860167 2.145625 -1.907643  
 H 7.905008 1.028670 -0.384883  
 H 5.560292 3.056964 -3.364482  
 H 7.702437 2.794668 -2.128451  
 C 3.850157 -1.936587 -1.234652  
 C 4.769632 -2.287457 -2.236157  
 C 3.172162 -2.963729 -0.559119  
 C 5.021916 -3.624729 -2.538925  
 H 5.295727 -1.510341 -2.779233  
 C 3.427689 -4.302409 -0.863948  
 H 2.432081 -2.751940 0.206728  
 C 4.354706 -4.638866 -1.849783  
 H 5.742956 -3.872068 -3.312827  
 H 2.895633 -5.078152 -0.321263  
 H 4.555399 -5.681218 -2.080456  
 Br -0.464122 1.685427 2.877072  
 Br 0.359475 -2.586026 2.175390

<sup>1</sup>[Ni<sup>II</sup>]Br<sub>2</sub>

B3LYP-D3BJ/BSI SCF energy in solution:

-2195.821062a.u.

M06/BSII SCF energy in solution: -2194.483533a.u.

M06/BSII free energy in solution: -2193.855275a.u.

C 1.253309 -0.062664 -1.245607  
 N 1.366432 -0.238326 0.024910  
 O 2.391380 -0.023076 -1.941586  
 C 3.466471 -0.509952 -1.024141  
 C 2.806300 -0.209693 0.363343  
 H 3.030624 -1.006865 1.067057  
 C 3.176618 1.112670 1.000650  
 C 4.233295 1.146494 1.916867  
 C 2.519344 2.302964 0.671850  
 C 4.635654 2.352763 2.487756  
 H 4.743360 0.224197 2.178422  
 C 2.916222 3.510196 1.248488  
 H 1.690355 2.295584 -0.027513  
 C 3.976943 3.538685 2.154767  
 H 5.457578 2.365731 3.197249  
 H 2.395342 4.426990 0.988570  
 H 4.285533 4.478062 2.603605  
 C -1.238144 0.164240 -1.241082  
 N -1.359461 0.191064 0.040958  
 O -2.370227 0.243325 -1.944509  
 C -3.434451 0.665044 -0.983475  
 C -2.803360 0.177380 0.362556  
 H -3.004670 0.893074 1.154767  
 C -3.237512 -1.192689 0.835775  
 C -4.311256 -1.283926 1.727913

|    |           |           |           |    |           |           |           |
|----|-----------|-----------|-----------|----|-----------|-----------|-----------|
| C  | -2.626558 | -2.365330 | 0.379948  | C  | -2.829665 | 3.041766  | -0.230426 |
| C  | -4.779626 | -2.528231 | 2.145907  | C  | -4.111749 | 4.102164  | -2.471734 |
| H  | -4.783263 | -0.375493 | 2.090320  | H  | -4.624739 | 2.071114  | -2.948293 |
| C  | -3.090926 | -3.611960 | 0.802528  | C  | -2.821665 | 4.420268  | -0.458022 |
| H  | -1.782938 | -2.316360 | -0.300034 | H  | -2.315959 | 2.660641  | 0.645271  |
| C  | -4.170382 | -3.696822 | 1.682639  | C  | -3.461899 | 4.954562  | -1.575303 |
| H  | -5.614667 | -2.585366 | 2.837641  | H  | -4.611621 | 4.507574  | -3.346294 |
| H  | -2.607471 | -4.515423 | 0.442945  | H  | -2.312496 | 5.072623  | 0.245078  |
| H  | -4.530668 | -4.666848 | 2.011799  | H  | -3.456096 | 6.026595  | -1.748036 |
| C  | 0.009348  | 0.084482  | -2.078704 | C  | 4.726692  | 0.279612  | -1.275456 |
| C  | -0.092580 | -1.145618 | -3.019416 | C  | 5.938270  | -0.204681 | -0.766979 |
| H  | 0.806143  | -1.204672 | -3.635438 | C  | 4.695883  | 1.524177  | -1.910372 |
| H  | -0.184796 | -2.071318 | -2.444915 | C  | 7.104155  | 0.548983  | -0.890839 |
| H  | -0.962353 | -1.040504 | -3.669650 | H  | 5.966908  | -1.169700 | -0.271507 |
| C  | 0.115466  | 1.391625  | -2.908379 | C  | 5.866095  | 2.273415  | -2.039984 |
| H  | -0.781634 | 1.506746  | -3.518342 | H  | 3.760512  | 1.907524  | -2.299707 |
| H  | 0.208190  | 2.263086  | -2.254370 | C  | 7.071466  | 1.790691  | -1.529208 |
| H  | 0.986791  | 1.342766  | -3.562974 | H  | 8.037210  | 0.164749  | -0.490057 |
| Ni | -0.005651 | -0.136945 | 1.419615  | H  | 5.832454  | 3.237161  | -2.539153 |
| C  | -4.724067 | -0.035101 | -1.332715 | H  | 7.980149  | 2.376678  | -1.628852 |
| C  | -5.923184 | 0.452487  | -0.799232 | C  | 3.585212  | -1.997615 | -1.333157 |
| C  | -4.733641 | -1.217094 | -2.078530 | C  | 4.296749  | -2.392620 | -2.475584 |
| C  | -7.117066 | -0.235801 | -1.008743 | C  | 2.910169  | -2.971131 | -0.584157 |
| H  | -5.920671 | 1.367169  | -0.215660 | C  | 4.346813  | -3.732669 | -2.852928 |
| C  | -5.931058 | -1.900407 | -2.293138 | H  | 4.813560  | -1.646272 | -3.069395 |
| H  | -3.807628 | -1.604074 | -2.486087 | C  | 2.962005  | -4.314161 | -0.964522 |
| C  | -7.124474 | -1.414617 | -1.757186 | H  | 2.337316  | -2.704914 | 0.297253  |
| H  | -8.040323 | 0.150007  | -0.587254 | C  | 3.680197  | -4.699460 | -2.096035 |
| H  | -5.928184 | -2.816098 | -2.876754 | H  | 4.907155  | -4.021545 | -3.737033 |
| H  | -8.054501 | -1.950382 | -1.921817 | H  | 2.438356  | -5.056549 | -0.369584 |
| C  | -3.486519 | 2.182121  | -1.120642 | H  | 3.721665  | -5.744832 | -2.387045 |
| C  | -4.121644 | 2.727840  | -2.246417 | Br | -1.064512 | 1.268546  | 3.097658  |



Br 1.039889 -1.799171 2.854370

**<sup>3</sup>[Ni<sup>II</sup>]Br<sub>2</sub>**

B3LYP-D3BJ/BSI SCF energy in solution:

-2195.844883a.u.

M06/BSII SCF energy in solution: -2194.513428a.u.

M06/BSII free energy in solution: -2193.881352a.u.

C 1.263385 -0.328265 -1.126405

N 1.359201 -0.465921 0.148411

O 2.397146 -0.095812 -1.787788

C 3.519955 -0.304301 -0.826968

C 2.755450 -0.202159 0.549758

H 3.098942 -0.990207 1.219892

C 2.861748 1.128379 1.260717

C 3.644166 1.230660 2.413149

C 2.220148 2.268285 0.763884

C 3.794340 2.458412 3.059659

H 4.137620 0.345190 2.804429

C 2.372819 3.496222 1.404283

H 1.597090 2.202936 -0.122137

C 3.161090 3.594866 2.553816

H 4.402969 2.525679 3.956405

H 1.875394 4.375053 1.005988

H 3.277908 4.551698 3.053964

C -1.212195 -0.094417 -1.189788

N -1.441991 -0.346444 0.051053

O -2.178458 0.545023 -1.850924

C -3.112572 1.079037 -0.810802

C -2.813898 0.089447 0.371255

H -2.815330 0.629991 1.315794

C -3.755333 -1.088756 0.490908

C -4.853856 -0.988006 1.351368

C -3.586200 -2.250441 -0.268737

C -5.779695 -2.026685 1.441329

H -4.987322 -0.088407 1.945231

C -4.508976 -3.292655 -0.175527

H -2.730529 -2.353065 -0.925736

C -5.609048 -3.182733 0.676712

H -6.629219 -1.935190 2.111445

H -4.365286 -4.191615 -0.767730

H -6.326681 -3.994630 0.748331

C 0.021475 -0.476099 -1.981924

C -0.092270 -1.977589 -2.375676

H 0.803291 -2.275831 -2.926226

H -0.191528 -2.609468 -1.490915

H -0.962312 -2.116134 -3.022454

C 0.138678 0.398207 -3.244894

H -0.742918 0.253990 -3.870372

H 0.214480 1.458869 -2.992486

H 1.022165 0.107104 -3.813410

Ni -0.118437 -1.011772 1.378084

C -4.527119 0.998233 -1.326616

C -5.526748 1.722771 -0.665854

C -4.876277 0.144013 -2.375790

C -6.860412 1.589227 -1.047901

H -5.260662 2.386652 0.150344

C -6.211445 0.018442 -2.762099

H -4.107353 -0.421786 -2.887937

C -7.206790 0.736207 -2.098030

H -7.627899 2.152348 -0.525578

H -6.471826 -0.644787 -3.581524

H -8.245541 0.633804 -2.397314

C -2.616845 2.499709 -0.562332

C -2.924644 3.488354 -1.509171  
C -1.770325 2.824703 0.505248  
C -2.410250 4.776683 -1.383923  
H -3.569303 3.244356 -2.346919  
C -1.258457 4.118770 0.631346  
H -1.491609 2.090230 1.251597  
C -1.576132 5.097504 -0.309356  
H -2.662207 5.530443 -2.123784  
H -0.608085 4.351035 1.468586  
H -1.178621 6.102994 -0.207999  
C 4.542093 0.789005 -1.032063  
C 5.728831 0.741166 -0.288772  
C 4.316101 1.862411 -1.895549  
C 6.672678 1.758559 -0.405098  
H 5.912634 -0.093174 0.380919  
C 5.267019 2.878867 -2.015169  
H 3.399909 1.907308 -2.471452  
C 6.444481 2.832225 -1.270136  
H 7.586741 1.712900 0.179141  
H 5.081297 3.708127 -2.691233  
H 7.181257 3.624653 -1.361445  
C 4.042005 -1.702962 -1.134574  
C 5.048050 -1.872455 -2.096076  
C 3.456459 -2.840392 -0.560411  
C 5.472790 -3.148758 -2.462699  
H 5.501579 -1.003816 -2.559976  
C 3.881585 -4.116821 -0.930128  
H 2.656129 -2.757434 0.165648  
C 4.892613 -4.276210 -1.878443  
H 6.257125 -3.260165 -3.205401  
H 3.418046 -4.985550 -0.472121  
H 5.224587 -5.270659 -2.161564

Br -0.468057 0.373488 3.330791  
Br 0.065214 -3.435914 1.341207

**K<sub>3</sub>PO<sub>4</sub>@[Si]H**

B3LYP/BSI SCF energy: -3195.848757a.u.

M06/BSII SCF energy in solution: -3195.719331a.u.

M06/BSII free energy in solution: -3195.535384a.u.

Si 0.207563 0.807336 0.741564  
H 0.163524 1.453767 2.098988  
O 0.203610 1.711472 -0.713158  
O 2.010346 0.766770 0.811548  
C 1.329399 2.092935 -1.493343  
H 1.721012 1.213680 -2.024573  
H 2.127833 2.478043 -0.852343  
C 0.900794 3.156503 -2.499240  
H 1.754847 3.482552 -3.103581  
H 0.136180 2.775770 -3.189230  
H 0.485712 4.029963 -1.985977  
C 2.681276 0.695407 2.041339  
H 2.080247 1.148316 2.847160  
H 2.843722 -0.359374 2.350192  
C 4.034703 1.401959 1.967330  
H 3.898411 2.458933 1.717862  
H 4.565757 1.334642 2.924125  
H 4.673583 0.958635 1.193130  
O -1.650214 0.962458 0.710428  
C -2.198015 2.231982 0.964127  
H -1.595607 2.777173 1.712439  
H -2.188994 2.857783 0.053553  
C -3.634581 2.116683 1.475995  
H -3.666018 1.582238 2.434554

H -4.082532 3.104609 1.633680  
H -4.263718 1.571662 0.760692  
O 0.525815 -3.216469 -0.132085  
P -0.221057 -1.990091 -0.631030  
O 0.438198 -1.257453 -1.824171  
O -1.763024 -2.039901 -0.727891  
O 0.047872 -0.873015 0.679217  
K -2.324485 -1.435512 1.662910  
K -1.676070 0.266485 -2.078822  
K 2.662330 -1.616418 -0.355429

**K<sub>3</sub>PO<sub>4</sub>@1**

B3LYP/BSI SCF energy: -2972.678761a.u.

M06/BSII SCF energy in solution: -2972.472436a.u.

M06/BSII free energy in solution: -2972.331062a.u.

Br -3.311682 -1.256294 -0.131350  
C -2.325303 1.574330 -0.062236  
C -3.946764 0.783864 1.812375  
H -3.696681 1.698468 2.363825  
H -4.864497 0.962415 1.247344  
H -4.119907 -0.018269 2.534602  
C -2.796649 0.449634 0.886320  
C 0.025112 2.415221 0.419046  
C 1.199109 2.083963 1.119870  
C -0.008742 3.539095 -0.428469  
C 2.320163 2.905413 0.987624  
H 1.257892 1.130502 1.649841  
C 1.131115 4.334994 -0.556286  
H -0.919131 3.768582 -0.970039  
C 2.298183 4.033124 0.156945  
H 3.228739 2.641279 1.521921

H 1.099047 5.206429 -1.205055  
H 3.174462 4.669449 0.068511  
N -1.107573 1.616762 0.573116  
C -1.359838 0.456102 1.461518  
H -1.321249 0.723141 2.524690  
H -0.676783 -0.379843 1.262933  
O -2.819483 2.217790 -0.964209  
O 0.608046 -0.578403 -1.066151  
P 1.615785 -1.301889 -0.084665  
O 3.084157 -0.791681 -0.356719  
O 1.553121 -2.863460 -0.320626  
O 1.268037 -1.023424 1.423034  
K 3.396511 -2.626085 1.595667  
K -0.582113 -2.727619 -1.625076  
K 2.316858 1.176763 -1.741436

**K<sub>3</sub>PO<sub>4</sub>@2**

B3LYP/BSI SCF energy: -2678.081844a.u.

M06/BSII SCF energy in solution: -2677.983231a.u.

M06/BSII free energy in solution: -2677.852702a.u.

O -2.601115 0.660047 -0.801511  
P -1.350751 -0.086040 -0.205892  
O -0.561626 -0.853822 -1.334299  
O -1.780554 -1.062073 0.952427  
O -0.428517 1.061989 0.387633  
K -0.594621 -3.030708 -0.044092  
K -2.737455 1.258636 1.802612  
K -0.604006 1.653560 -2.253277  
C 2.784808 -3.050316 0.105841  
H 2.785080 -3.846960 -0.635951  
H 3.175716 -3.302997 1.090031

C 2.373138 -1.809276 -0.191386  
 H 1.973596 -1.603097 -1.185551  
 C 2.347816 -0.631659 0.735470  
 H 2.737259 -0.912950 1.723721  
 H 1.306365 -0.289689 0.847298  
 C 3.128600 0.576690 0.182643  
 H 4.203197 0.349651 0.124453  
 H 2.795553 0.761837 -0.849431  
 C 2.886636 1.843439 1.012257  
 H 3.227103 1.671392 2.043450  
 H 1.802550 2.003329 1.054821  
 C 3.593116 3.080035 0.447564  
 H 4.679967 2.939556 0.400074  
 H 3.400804 3.968761 1.059045  
 H 3.249468 3.300882 -0.571530

**K<sub>3</sub>PO<sub>4</sub>@THF<sub>3</sub>**

B3LYP/BSI SCF energy: -3139.644008a.u.

M06/BSII SCF energy in solution: -3139.371103a.u.

M06/BSII free energy in solution: -3139.067191a.u.

O -1.053852 0.537306 -0.965300  
 P 0.356757 0.110774 -0.403105  
 O 1.035057 1.323010 0.357740  
 O 1.289160 -0.380019 -1.577570  
 O 0.080956 -1.067067 0.608445  
 K 3.156761 1.246822 -1.044011  
 K -0.773373 -1.962170 -1.999411  
 K -1.195959 1.100509 1.779167  
 C -3.490702 -1.635137 -0.110799  
 O -3.147128 -2.774007 -0.932065  
 C -3.308539 -3.972839 -0.150527

C -3.436436 -3.539140 1.328022  
 C -3.045277 -2.049626 1.289985  
 H -2.939313 -0.769239 -0.496368  
 H -4.576032 -1.454471 -0.165298  
 H -4.194665 -4.522758 -0.494222  
 H -2.429065 -4.604807 -0.325390  
 H -4.468664 -3.663010 1.672791  
 H -2.792877 -4.128561 1.986793  
 H -3.537770 -1.471327 2.081393  
 H -1.957108 -1.916403 1.351179  
 C 3.545308 -0.649181 1.728162  
 O 4.487908 -0.424002 0.636623  
 C 4.791476 -1.697370 0.048708  
 C 3.492034 -2.489446 0.161398  
 C 2.981817 -2.075566 1.555744  
 H 4.075987 -0.518275 2.680623  
 H 2.756022 0.103954 1.634376  
 H 5.125995 -1.518699 -0.980465  
 H 5.615517 -2.183915 0.596072  
 H 2.780337 -2.138118 -0.594475  
 H 3.641690 -3.569356 0.057394  
 H 1.887930 -2.051365 1.572881  
 H 3.368756 -2.746155 2.332044  
 C -2.528903 3.325040 -0.480036  
 O -2.149088 3.521856 0.917199  
 C -1.084993 4.485643 0.974071  
 C -0.361696 4.350128 -0.363260  
 C -1.545302 4.151718 -1.324610  
 H -2.411588 2.260897 -0.709061  
 H -3.570622 3.645405 -0.604620  
 H -1.497958 5.497465 1.117125  
 H -0.456517 4.248218 1.840878

|   |           |          |           |   |           |           |           |
|---|-----------|----------|-----------|---|-----------|-----------|-----------|
| H | 0.251660  | 5.225103 | -0.604419 | O | 2.187587  | 3.688220  | -1.843615 |
| H | 0.258829  | 3.445674 | -0.340119 | C | 2.851762  | 4.954756  | -1.704679 |
| H | -1.979835 | 5.116561 | -1.612788 | C | 4.311741  | 4.656022  | -1.287395 |
| H | -1.260045 | 3.611562 | -2.230632 | C | 4.285289  | 3.149850  | -0.963047 |
|   |           |          |           | H | 2.699418  | 1.712251  | -1.558868 |
|   |           |          |           | H | 3.557724  | 2.530910  | -2.918966 |
|   |           |          |           | H | 2.807199  | 5.507303  | -2.653306 |
|   |           |          |           | H | 2.308703  | 5.534634  | -0.948906 |
|   |           |          |           | H | 4.994398  | 4.853597  | -2.120407 |
|   |           |          |           | H | 4.635868  | 5.270465  | -0.442834 |
|   |           |          |           | H | 5.248164  | 2.659535  | -1.134317 |
|   |           |          |           | H | 3.995413  | 2.982506  | 0.080857  |
|   |           |          |           | C | -4.006294 | -0.930191 | 0.254987  |
|   |           |          |           | O | -3.923878 | -2.233304 | -0.363565 |
|   |           |          |           | C | -5.267849 | -2.697701 | -0.500506 |
|   |           |          |           | C | -6.135367 | -1.445322 | -0.782922 |
|   |           |          |           | C | -5.183957 | -0.261774 | -0.462607 |
|   |           |          |           | H | -4.218179 | -1.054611 | 1.329471  |
|   |           |          |           | H | -3.037153 | -0.432946 | 0.116427  |
|   |           |          |           | H | -5.287804 | -3.438045 | -1.306026 |
|   |           |          |           | H | -5.588416 | -3.191443 | 0.430040  |
|   |           |          |           | H | -6.474778 | -1.415593 | -1.822081 |
|   |           |          |           | H | -7.026169 | -1.439135 | -0.147901 |
|   |           |          |           | H | -4.832442 | 0.212089  | -1.384232 |
|   |           |          |           | H | -5.660839 | 0.508913  | 0.149963  |
|   |           |          |           | C | -0.937013 | -2.524356 | -4.591606 |
|   |           |          |           | O | -0.133397 | -2.385017 | -3.416806 |
|   |           |          |           | C | 0.532338  | -1.107442 | -3.551265 |
|   |           |          |           | C | -0.570726 | -0.176263 | -4.064713 |
|   |           |          |           | C | -1.466458 | -1.107469 | -4.925495 |
|   |           |          |           | H | -0.323755 | -2.917227 | -5.417403 |
|   |           |          |           | H | -1.725464 | -3.254185 | -4.378346 |

**K<sub>3</sub>PO<sub>4</sub>@THF<sub>6</sub>**

B3LYP/BSI SCF energy: -3837.070032a.u.

M06/BSII SCF energy in solution: -3836.470866a.u.

M06/BSII free energy in solution: -3835.849721a.u.

|   |           |           |           |
|---|-----------|-----------|-----------|
| O | 1.491690  | 0.212673  | -0.685019 |
| P | 0.228824  | -0.113439 | 0.214450  |
| O | 0.365099  | -1.574174 | 0.787450  |
| O | -1.075542 | 0.028714  | -0.661363 |
| O | 0.237010  | 0.950975  | 1.376102  |
| K | -1.284975 | -2.561677 | -0.914750 |
| K | -0.087413 | 2.588048  | -0.801627 |
| K | 2.620806  | -0.345489 | 1.847053  |
| C | -1.858512 | 3.269981  | 2.030723  |
| O | -1.733548 | 4.038906  | 0.813862  |
| C | -2.830973 | 4.954387  | 0.795308  |
| C | -4.008968 | 4.246832  | 1.514642  |
| C | -3.357739 | 2.974642  | 2.115362  |
| H | -1.215965 | 2.384422  | 1.937307  |
| H | -1.528528 | 3.887206  | 2.883042  |
| H | -2.553337 | 5.881033  | 1.320874  |
| H | -3.041460 | 5.204780  | -0.249277 |
| H | -4.430472 | 4.892504  | 2.290957  |
| H | -4.817749 | 3.998158  | 0.821696  |
| H | -3.688653 | 2.771919  | 3.138075  |
| H | -3.587826 | 2.096451  | 1.504634  |
| C | 3.183216  | 2.640372  | -1.888081 |

H 0.930805 -0.805488 -2.575754  
 H 1.350562 -1.210942 -4.282877  
 H -1.113673 0.202488 -3.193645  
 H -0.171749 0.669392 -4.634008  
 H -2.522725 -1.001455 -4.659778  
 H -1.376266 -0.901216 -5.996392  
 C 3.796277 -2.116061 -0.878204  
 O 4.186281 -2.219460 0.525667  
 C 3.894000 -3.543662 0.989875  
 C 2.713745 -4.005009 0.137134  
 C 3.111779 -3.446938 -1.240118  
 H 3.103009 -1.270582 -0.966999  
 H 4.698574 -1.934500 -1.475812  
 H 4.770146 -4.199376 0.856047  
 H 3.675140 -3.485893 2.062651  
 H 2.578815 -5.091718 0.145771  
 H 1.801200 -3.506193 0.483411  
 H 3.810040 -4.127520 -1.742393  
 H 2.253583 -3.292414 -1.900155  
 C 1.207231 -2.390889 4.364834  
 O 1.604299 -1.009387 4.334039  
 C 0.418515 -0.167326 4.466704  
 C -0.766960 -1.121964 4.660115  
 C -0.266429 -2.397546 3.965093  
 H 1.846138 -2.947095 3.668823  
 H 1.361951 -2.800966 5.376002  
 H 0.571519 0.504521 5.320078  
 H 0.303812 0.407283 3.538891  
 H -0.960686 -1.306901 5.724205  
 H -1.679990 -0.724085 4.208570  
 H -0.789195 -3.304253 4.287801  
 H -0.337904 -2.280487 2.876653

**<sup>1</sup>TS1**

B3LYP/BSI SCF energy: -2431.309408a.u.  
 M06/BSII SCF energy in solution: -2430.165294a.u.  
 M06/BSII free energy in solution: -2429.379947a.u.

C -1.430286 -1.027830 1.164312  
 N -1.563125 -0.299103 0.117871  
 O -2.527856 -1.672653 1.599289  
 C -3.537859 -1.569684 0.507243  
 C -2.996706 -0.315367 -0.272939  
 C 1.096191 -0.976676 1.270804  
 N 1.291793 -0.383544 0.149383  
 O 2.186348 -1.445077 1.905798  
 C 3.365512 -0.860387 1.217869  
 C 2.735223 -0.510932 -0.180383  
 Ni -0.096207 0.600629 -1.033682  
 C -0.198004 -1.202379 2.034610  
 C -0.264236 -0.140645 3.173510  
 H -1.156881 -0.310696 3.781459  
 H -0.300019 0.871171 2.762789  
 H 0.618176 -0.231486 3.811278  
 C -0.186068 -2.624709 2.648403  
 H 0.686128 -2.741650 3.291956  
 H -0.155669 -3.393659 1.871303  
 H -1.090079 -2.777752 3.238320  
 C 4.479456 -1.895302 1.188549  
 C 5.757304 -1.497822 0.770351  
 C 4.269250 -3.228806 1.553280  
 C 6.799819 -2.419837 0.706905  
 H 5.939179 -0.461163 0.502402  
 C 5.318751 -4.149218 1.499816

|   |           |           |           |   |           |           |           |
|---|-----------|-----------|-----------|---|-----------|-----------|-----------|
| H | 3.287525  | -3.547133 | 1.883428  | C | -7.304853 | -1.137175 | 0.791306  |
| C | 6.584673  | -3.750361 | 1.073699  | H | -5.881262 | -1.345467 | -0.804847 |
| H | 7.782561  | -2.096495 | 0.376496  | C | -7.501817 | -1.091447 | 2.173955  |
| H | 5.141297  | -5.180370 | 1.791855  | H | -6.548538 | -1.179239 | 4.104396  |
| H | 7.399002  | -4.467640 | 1.030340  | H | -8.151240 | -1.051629 | 0.116211  |
| C | 3.760863  | 0.357694  | 2.067392  | H | -8.501957 | -0.970418 | 2.579555  |
| C | 3.737457  | 1.679102  | 1.607083  | C | -0.169619 | 2.547782  | -0.411868 |
| C | 4.143183  | 0.115005  | 3.398773  | H | 0.100833  | 2.634377  | 0.646761  |
| C | 4.094881  | 2.730693  | 2.459374  | H | -1.251812 | 2.664427  | -0.546868 |
| H | 3.444844  | 1.923768  | 0.592047  | C | 0.521380  | 3.526896  | -1.247216 |
| C | 4.488806  | 1.162792  | 4.246602  | H | 0.065219  | 3.671434  | -2.225560 |
| H | 4.174058  | -0.906681 | 3.764982  | C | 1.040718  | 4.811533  | -0.628973 |
| C | 4.468313  | 2.479719  | 3.776870  | H | 1.680609  | 5.345833  | -1.338027 |
| H | 4.077060  | 3.747938  | 2.079273  | H | 1.652325  | 4.572645  | 0.249612  |
| H | 4.782289  | 0.952315  | 5.271120  | C | -0.129053 | 5.725326  | -0.207153 |
| H | 4.745042  | 3.299225  | 4.433894  | H | -0.766621 | 5.926354  | -1.079624 |
| C | -3.416444 | -2.885504 | -0.277620 | H | -0.760776 | 5.201002  | 0.520486  |
| C | -2.684990 | -2.997031 | -1.469418 | C | 0.348183  | 7.056791  | 0.388327  |
| C | -3.994880 | -4.044643 | 0.266245  | H | 0.978017  | 7.577667  | -0.345071 |
| C | -2.549529 | -4.236343 | -2.102727 | H | 0.993477  | 6.855001  | 1.254358  |
| H | -2.211382 | -2.137193 | -1.931676 | C | -0.805766 | 7.970676  | 0.813182  |
| C | -3.854221 | -5.278334 | -0.364497 | H | -1.449101 | 8.218329  | -0.038847 |
| H | -4.563711 | -3.976592 | 1.187852  | H | -0.436808 | 8.911311  | 1.235447  |
| C | -3.131594 | -5.378306 | -1.555944 | H | -1.433874 | 7.488873  | 1.571315  |
| H | -1.985904 | -4.295789 | -3.029046 | C | 2.946126  | -1.513047 | -1.304880 |
| H | -4.314249 | -6.160442 | 0.071784  | C | 2.321307  | -2.766979 | -1.315122 |
| H | -3.027524 | -6.338246 | -2.053675 | C | 3.786751  | -1.169141 | -2.369749 |
| C | -4.915266 | -1.402048 | 1.124730  | C | 2.542130  | -3.661142 | -2.361565 |
| C | -5.118311 | -1.360398 | 2.507207  | H | 1.652013  | -3.050592 | -0.508544 |
| C | -6.022935 | -1.297048 | 0.270964  | C | 4.010092  | -2.063136 | -3.417698 |
| C | -6.406361 | -1.206927 | 3.027763  | H | 4.253539  | -0.188613 | -2.388235 |
| H | -4.270988 | -1.451345 | 3.176743  | C | 3.389312  | -3.312103 | -3.415433 |

|    |           |           |           |    |           |           |           |
|----|-----------|-----------|-----------|----|-----------|-----------|-----------|
| H  | 2.048441  | -4.628714 | -2.356093 | C  | 3.365512  | -0.860387 | 1.217869  |
| H  | 4.658064  | -1.775986 | -4.240443 | C  | 2.735223  | -0.510932 | -0.180383 |
| H  | 3.555687  | -4.006285 | -4.234060 | Ni | -0.096207 | 0.600629  | -1.033682 |
| C  | -3.642520 | 1.030216  | 0.015600  | C  | -0.198004 | -1.202379 | 2.034610  |
| C  | -4.226987 | 1.741002  | -1.039167 | C  | -0.264236 | -0.140645 | 3.173510  |
| C  | -3.644650 | 1.598523  | 1.297097  | H  | -1.156881 | -0.310696 | 3.781459  |
| C  | -4.813799 | 2.988928  | -0.818003 | H  | -0.300019 | 0.871171  | 2.762789  |
| H  | -4.201678 | 1.324200  | -2.041963 | H  | 0.618176  | -0.231486 | 3.811278  |
| C  | -4.229529 | 2.843836  | 1.519788  | C  | -0.186068 | -2.624709 | 2.648403  |
| H  | -3.193647 | 1.066208  | 2.128822  | H  | 0.686128  | -2.741650 | 3.291956  |
| C  | -4.817979 | 3.542312  | 0.462133  | H  | -0.155669 | -3.393659 | 1.871303  |
| H  | -5.258628 | 3.528750  | -1.648824 | H  | -1.090079 | -2.777752 | 3.238320  |
| H  | -4.227407 | 3.269543  | 2.519228  | C  | 4.479456  | -1.895302 | 1.188549  |
| H  | -5.271770 | 4.513708  | 0.636285  | C  | 5.757304  | -1.497822 | 0.770351  |
| H  | -3.052155 | -0.479962 | -1.347569 | C  | 4.269250  | -3.228806 | 1.553280  |
| H  | 3.089424  | 0.454052  | -0.535358 | C  | 6.799819  | -2.419837 | 0.706905  |
| Br | -1.024212 | 0.292160  | -3.275997 | H  | 5.939179  | -0.461163 | 0.502402  |
| Br | 2.450369  | 2.633759  | -2.105036 | C  | 5.318751  | -4.149218 | 1.499816  |

### <sup>3</sup>TS1

B3LYP/BSI SCF energy: -2431.329907a.u.

M06/BSII SCF energy in solution: -2430.184543a.u.

M06/BSII free energy in solution: -2429.400003a.u.

|   |           |           |           |   |          |           |          |
|---|-----------|-----------|-----------|---|----------|-----------|----------|
| C | -1.430286 | -1.027830 | 1.164312  | C | 3.760863 | 0.357694  | 2.067392 |
| N | -1.563125 | -0.299103 | 0.117871  | C | 3.737457 | 1.679102  | 1.607083 |
| O | -2.527856 | -1.672653 | 1.599289  | C | 4.143183 | 0.115005  | 3.398773 |
| C | -3.537859 | -1.569684 | 0.507243  | C | 4.094881 | 2.730693  | 2.459374 |
| C | -2.996706 | -0.315367 | -0.272939 | H | 3.444844 | 1.923768  | 0.592047 |
| C | 1.096191  | -0.976676 | 1.270804  | C | 4.488806 | 1.162792  | 4.246602 |
| N | 1.291793  | -0.383544 | 0.149383  | H | 4.174058 | -0.906681 | 3.764982 |
| O | 2.186348  | -1.445077 | 1.905798  | C | 4.468313 | 2.479719  | 3.776870 |
|   |           |           |           | H | 4.077060 | 3.747938  | 2.079273 |



|   |           |           |           |   |           |           |           |
|---|-----------|-----------|-----------|---|-----------|-----------|-----------|
| H | 4.782289  | 0.952315  | 5.271120  | C | -0.129053 | 5.725326  | -0.207153 |
| H | 4.745042  | 3.299225  | 4.433894  | H | -0.766621 | 5.926354  | -1.079624 |
| C | -3.416444 | -2.885504 | -0.277620 | H | -0.760776 | 5.201002  | 0.520486  |
| C | -2.684990 | -2.997031 | -1.469418 | C | 0.348183  | 7.056791  | 0.388327  |
| C | -3.994880 | -4.044643 | 0.266245  | H | 0.978017  | 7.577667  | -0.345071 |
| C | -2.549529 | -4.236343 | -2.102727 | H | 0.993477  | 6.855001  | 1.254358  |
| H | -2.211382 | -2.137193 | -1.931676 | C | -0.805766 | 7.970676  | 0.813182  |
| C | -3.854221 | -5.278334 | -0.364497 | H | -1.449101 | 8.218329  | -0.038847 |
| H | -4.563711 | -3.976592 | 1.187852  | H | -0.436808 | 8.911311  | 1.235447  |
| C | -3.131594 | -5.378306 | -1.555944 | H | -1.433874 | 7.488873  | 1.571315  |
| H | -1.985904 | -4.295789 | -3.029046 | C | 2.946126  | -1.513047 | -1.304880 |
| H | -4.314249 | -6.160442 | 0.071784  | C | 2.321307  | -2.766979 | -1.315122 |
| H | -3.027524 | -6.338246 | -2.053675 | C | 3.786751  | -1.169141 | -2.369749 |
| C | -4.915266 | -1.402048 | 1.124730  | C | 2.542130  | -3.661142 | -2.361565 |
| C | -5.118311 | -1.360398 | 2.507207  | H | 1.652013  | -3.050592 | -0.508544 |
| C | -6.022935 | -1.297048 | 0.270964  | C | 4.010092  | -2.063136 | -3.417698 |
| C | -6.406361 | -1.206927 | 3.027763  | H | 4.253539  | -0.188613 | -2.388235 |
| H | -4.270988 | -1.451345 | 3.176743  | C | 3.389312  | -3.312103 | -3.415433 |
| C | -7.304853 | -1.137175 | 0.791306  | H | 2.048441  | -4.628714 | -2.356093 |
| H | -5.881262 | -1.345467 | -0.804847 | H | 4.658064  | -1.775986 | -4.240443 |
| C | -7.501817 | -1.091447 | 2.173955  | H | 3.555687  | -4.006285 | -4.234060 |
| H | -6.548538 | -1.179239 | 4.104396  | C | -3.642520 | 1.030216  | 0.015600  |
| H | -8.151240 | -1.051629 | 0.116211  | C | -4.226987 | 1.741002  | -1.039167 |
| H | -8.501957 | -0.970418 | 2.579555  | C | -3.644650 | 1.598523  | 1.297097  |
| C | -0.169619 | 2.547782  | -0.411868 | C | -4.813799 | 2.988928  | -0.818003 |
| H | 0.100833  | 2.634377  | 0.646761  | H | -4.201678 | 1.324200  | -2.041963 |
| H | -1.251812 | 2.664427  | -0.546868 | C | -4.229529 | 2.843836  | 1.519788  |
| C | 0.521380  | 3.526896  | -1.247216 | H | -3.193647 | 1.066208  | 2.128822  |
| H | 0.065219  | 3.671434  | -2.225560 | C | -4.817979 | 3.542312  | 0.462133  |
| C | 1.040718  | 4.811533  | -0.628973 | H | -5.258628 | 3.528750  | -1.648824 |
| H | 1.680609  | 5.345833  | -1.338027 | H | -4.227407 | 3.269543  | 2.519228  |
| H | 1.652325  | 4.572645  | 0.249612  | H | -5.271770 | 4.513708  | 0.636285  |

H -3.052155 -0.479962 -1.347569  
H 3.089424 0.454052 -0.535358  
Br -1.024212 0.292160 -3.275997  
Br 2.450369 2.633759 -2.105036

**<sup>1</sup>TS2**

B3LYP/BSI SCF energy: -2949.028683a.u.

M06/BSII SCF energy in solution: -2947.863568a.u.

M06/BSII free energy in solution: -2947.028855a.u.

C -0.544685 -1.919928 -0.903574  
N -0.954492 -0.926947 -0.199140  
O -1.482466 -2.776197 -1.346533  
C -2.795590 -2.110435 -1.136520  
C -2.418998 -1.093458 0.004536  
H -2.901677 -0.131481 -0.158391  
C -2.717665 -1.523868 1.432927  
C -3.742360 -0.878185 2.134920  
C -2.000367 -2.541118 2.075321  
C -4.054491 -1.247913 3.443858  
H -4.284380 -0.068194 1.657135  
C -2.307052 -2.909806 3.384670  
H -1.191556 -3.048876 1.558902  
C -3.337105 -2.265588 4.072862  
H -4.850403 -0.732753 3.973978  
H -1.738033 -3.698254 3.868799  
H -3.572421 -2.550222 5.094267  
C 1.922859 -1.415481 -0.720155  
N 1.805177 -0.355989 -0.004723  
O 3.172093 -1.836919 -0.987794  
C 4.072232 -1.092816 -0.065148  
C 3.183116 0.164533 0.244988

H 3.249740 0.435434 1.296049  
C 3.455214 1.416336 -0.571988  
C 3.854312 2.581134 0.092381  
C 3.317505 1.446586 -1.966134  
C 4.125584 3.750203 -0.620724  
H 3.929369 2.577829 1.175772  
C 3.586591 2.612651 -2.680358  
H 3.002813 0.556804 -2.502686  
C 3.994101 3.768534 -2.008967  
H 4.429143 4.646906 -0.088409  
H 3.479078 2.619894 -3.761298  
H 4.201970 4.677419 -2.566291  
C 0.853219 -2.278547 -1.352039  
C 0.925582 -2.084767 -2.895622  
H 0.166939 -2.704279 -3.377766  
H 0.747172 -1.040781 -3.167217  
H 1.912308 -2.382332 -3.256955  
C 1.126054 -3.765195 -0.994556  
H 2.119718 -4.049051 -1.342093  
H 1.084911 -3.923948 0.087101  
H 0.381018 -4.402114 -1.473386  
Ni 0.103252 0.492958 0.742358  
Br -0.121157 2.771653 -0.977507  
Si -1.953017 2.981040 0.521671  
H -1.200212 1.280708 1.115711  
O -2.471702 4.437479 -0.121799  
O -1.760853 3.428355 2.092103  
C -1.878015 5.702769 0.153046  
H -0.846365 5.721486 -0.227522  
H -1.835073 5.865566 1.237266  
C -2.698627 6.793025 -0.520727  
H -2.260363 7.777546 -0.323820

|   |           |           |           |    |           |           |           |
|---|-----------|-----------|-----------|----|-----------|-----------|-----------|
| H | -2.729919 | 6.639466  | -1.604024 | H  | 5.736288  | -3.219879 | 0.086945  |
| H | -3.726726 | 6.791788  | -0.144741 | C  | 3.719314  | -2.829781 | 3.362538  |
| C | -1.898425 | 2.702763  | 3.315955  | H  | 2.842559  | -1.092107 | 2.481523  |
| H | -1.795545 | 1.628704  | 3.136833  | C  | 4.608411  | -3.893440 | 3.220519  |
| H | -1.067839 | 3.001065  | 3.960376  | H  | 6.027405  | -4.855597 | 1.908662  |
| C | -3.237716 | 3.027086  | 3.966717  | H  | 3.152035  | -2.707078 | 4.280556  |
| H | -4.072424 | 2.696482  | 3.339272  | H  | 4.741689  | -4.608036 | 4.027852  |
| H | -3.315960 | 2.519173  | 4.934662  | C  | -3.825291 | -3.156015 | -0.746654 |
| H | -3.341290 | 4.103830  | 4.133554  | C  | -5.167475 | -2.766153 | -0.631276 |
| O | -3.240219 | 1.997597  | 0.110651  | C  | -3.481730 | -4.486684 | -0.491083 |
| C | -4.580939 | 2.512839  | -0.026084 | C  | -6.142956 | -3.687069 | -0.255909 |
| H | -5.246407 | 1.724833  | 0.349481  | H  | -5.449860 | -1.739167 | -0.844487 |
| H | -4.711632 | 3.392803  | 0.611296  | C  | -4.462798 | -5.411324 | -0.123604 |
| C | -4.927011 | 2.855817  | -1.467234 | H  | -2.448866 | -4.801273 | -0.582277 |
| H | -4.807703 | 1.985256  | -2.118412 | C  | -5.793824 | -5.015756 | -0.001768 |
| H | -5.969655 | 3.189375  | -1.528879 | H  | -7.177275 | -3.367779 | -0.167373 |
| H | -4.282095 | 3.660858  | -1.825605 | H  | -4.180795 | -6.442809 | 0.067451  |
| C | 5.380703  | -0.801162 | -0.778767 | H  | -6.554863 | -5.735235 | 0.285668  |
| C | 6.390475  | -0.126984 | -0.076906 | C  | -3.114638 | -1.456665 | -2.488959 |
| C | 5.619539  | -1.194606 | -2.098577 | C  | -3.572855 | -2.276720 | -3.534191 |
| C | 7.607016  | 0.161628  | -0.690378 | C  | -2.863628 | -0.104477 | -2.759734 |
| H | 6.225103  | 0.168319  | 0.955183  | C  | -3.781193 | -1.760101 | -4.810698 |
| C | 6.844031  | -0.911462 | -2.710092 | H  | -3.769528 | -3.326608 | -3.342640 |
| H | 4.850615  | -1.725065 | -2.647813 | C  | -3.074800 | 0.412478  | -4.042216 |
| C | 7.839195  | -0.230565 | -2.011278 | H  | -2.512301 | 0.569228  | -1.987865 |
| H | 8.375989  | 0.690284  | -0.134743 | C  | -3.533010 | -0.409817 | -5.069848 |
| H | 7.015350  | -1.226176 | -3.735640 | H  | -4.140073 | -2.411790 | -5.602257 |
| H | 8.789486  | -0.008772 | -2.487994 | H  | -2.877832 | 1.464330  | -4.226468 |
| C | 4.275524  | -2.029033 | 1.136908  | H  | -3.698062 | -0.003866 | -6.063760 |
| C | 5.165313  | -3.108044 | 1.002953  | Br | 1.210177  | 1.225928  | 2.808997  |
| C | 3.547394  | -1.903266 | 2.329117  |    |           |           |           |
| C | 5.330346  | -4.031578 | 2.032378  |    |           |           |           |

<sup>3</sup>TS2

|                                                    |    |           |           |           |
|----------------------------------------------------|----|-----------|-----------|-----------|
| B3LYP/BSI SCF energy: -2949.037895a.u.             | C  | 3.649079  | 3.466605  | -1.476613 |
| M06/BSII SCF energy in solution: -2947.865192a.u.  | H  | 3.125675  | 1.475916  | -2.084614 |
| M06/BSII free energy in solution: -2947.034301a.u. | C  | 3.998591  | 4.303451  | -0.413121 |
|                                                    | H  | 4.353118  | 4.424964  | 1.710555  |
| C                                                  | H  | 3.571279  | 3.868119  | -2.482757 |
| N                                                  | H  | 4.192591  | 5.357308  | -0.590775 |
| O                                                  | C  | 0.807140  | -1.755965 | -1.838294 |
| C                                                  | C  | 0.686180  | -0.975141 | -3.181858 |
| C                                                  | H  | -0.105489 | -1.415402 | -3.791919 |
| H                                                  | H  | 0.447575  | 0.076248  | -3.001423 |
| C                                                  | H  | 1.630567  | -1.039253 | -3.728131 |
| C                                                  | C  | 1.155628  | -3.239760 | -2.121502 |
| C                                                  | H  | 2.100105  | -3.300834 | -2.662407 |
| C                                                  | H  | 1.259078  | -3.806219 | -1.191506 |
| H                                                  | H  | 0.367469  | -3.693060 | -2.723653 |
| C                                                  | Ni | 0.135121  | 0.437349  | 0.907257  |
| H                                                  | Br | -0.471440 | 2.867757  | -1.084234 |
| C                                                  | Si | -2.004452 | 3.317274  | 0.609682  |
| H                                                  | H  | -1.049775 | 1.356738  | 1.362390  |
| H                                                  | O  | -2.721722 | 4.682080  | -0.009988 |
| H                                                  | O  | -1.369405 | 3.874261  | 2.005763  |
| C                                                  | C  | -2.125711 | 5.979564  | -0.015395 |
| N                                                  | H  | -1.237621 | 5.974096  | -0.663187 |
| O                                                  | H  | -1.798052 | 6.239948  | 0.998418  |
| C                                                  | C  | -3.141472 | 6.988891  | -0.528082 |
| C                                                  | H  | -2.705862 | 7.993783  | -0.541828 |
| H                                                  | H  | -3.459155 | 6.736477  | -1.544489 |
| C                                                  | H  | -4.027435 | 7.005576  | 0.114265  |
| C                                                  | C  | -0.812452 | 3.300034  | 3.196202  |
| C                                                  | H  | -0.075171 | 2.537809  | 2.936780  |
| C                                                  | H  | -0.301365 | 4.125223  | 3.704140  |
| H                                                  | C  | -1.891942 | 2.701337  | 4.083407  |

H -2.364626 1.851251 3.583967  
H -1.446249 2.338035 5.015053  
H -2.656152 3.447169 4.327711  
O -3.249119 2.224885 0.589211  
C -4.600279 2.623774 0.905572  
H -5.024513 1.809964 1.505213  
H -4.595479 3.525355 1.527574  
C -5.428354 2.857434 -0.348387  
H -5.443441 1.964598 -0.980075  
H -6.461023 3.102475 -0.074009  
H -5.012765 3.689115 -0.921955  
C 5.332956 -0.426288 -1.124301  
C 6.372491 0.132253 -0.365987  
C 5.463116 -0.478909 -2.515121  
C 7.509105 0.641524 -0.988850  
H 6.291899 0.166695 0.716393  
C 6.606600 0.028549 -3.138892  
H 4.672612 -0.919753 -3.111026  
C 7.630611 0.592286 -2.380207  
H 8.301805 1.076032 -0.386907  
H 6.692669 -0.021058 -4.220689  
H 8.518067 0.987780 -2.865527  
C 4.458765 -2.185171 0.481630  
C 5.501864 -3.043732 0.098598  
C 3.695190 -2.520619 1.610577  
C 5.785996 -4.195545 0.830307  
H 6.099600 -2.808349 -0.775152  
C 3.984155 -3.674948 2.342736  
H 2.870583 -1.899533 1.947826  
C 5.029353 -4.514322 1.959426  
H 6.601888 -4.841382 0.518182  
H 3.385064 -3.906881 3.218472

H 5.254117 -5.408101 2.534637  
C -3.634907 -3.277573 -0.923380  
C -4.982019 -3.119058 -0.567262  
C -3.104424 -4.568469 -1.004375  
C -5.776702 -4.228199 -0.287282  
H -5.411750 -2.123039 -0.515343  
C -3.904927 -5.680771 -0.731466  
H -2.066571 -4.705506 -1.284313  
C -5.240758 -5.515687 -0.369674  
H -6.816748 -4.086641 -0.008217  
H -3.478176 -6.677197 -0.802847  
H -5.861440 -6.380829 -0.155669  
C -3.404514 -1.180116 -2.322866  
C -3.921290 -1.837699 -3.453060  
C -3.369499 0.220035 -2.322714  
C -4.398174 -1.118082 -4.545469  
H -3.951233 -2.922207 -3.472223  
C -3.852527 0.941548 -3.419991  
H -2.977610 0.777550 -1.480910  
C -4.367509 0.278761 -4.531924  
H -4.796328 -1.648274 -5.405971  
H -3.820440 2.026500 -3.393686  
H -4.742889 0.843058 -5.380810  
Br 0.960411 -0.258488 3.163117

**<sup>1</sup>TS3**

B3LYP/BSI SCF energy: -5391.345679 a.u.

M06/BSII SCF energy in solution: -5390.217748 a.u.

M06/BSII free energy in solution: -5389.37335 a.u.

C -1.020361 1.775899 -1.276901  
N -0.378678 1.202661 -0.325504

|   |           |           |           |    |           |           |           |
|---|-----------|-----------|-----------|----|-----------|-----------|-----------|
| O | -0.518470 | 2.943915  | -1.718398 | C  | -2.284077 | 1.310545  | -1.988105 |
| C | 0.816764  | 3.098562  | -1.098150 | C  | -1.880802 | 0.473451  | -3.237365 |
| C | 0.677829  | 2.149140  | 0.148062  | H  | -1.239184 | 1.074832  | -3.888293 |
| H | 1.589991  | 1.582401  | 0.333530  | H  | -1.360452 | -0.441706 | -2.944426 |
| C | 0.244147  | 2.795795  | 1.456300  | H  | -2.779560 | 0.201338  | -3.798232 |
| C | 0.994205  | 2.544546  | 2.610207  | C  | -3.103144 | 2.544746  | -2.436599 |
| C | -0.895260 | 3.608538  | 1.545670  | H  | -4.004785 | 2.217598  | -2.954789 |
| C | 0.622162  | 3.114340  | 3.830131  | H  | -3.405691 | 3.159140  | -1.584900 |
| H | 1.849814  | 1.878641  | 2.544134  | H  | -2.505900 | 3.156340  | -3.113526 |
| C | -1.265833 | 4.175049  | 2.763412  | Ni | -0.784697 | -0.640120 | 0.461731  |
| H | -1.492157 | 3.817698  | 0.662982  | Br | -0.148067 | -2.397824 | -1.236612 |
| C | -0.504588 | 3.931424  | 3.910207  | Si | 3.296874  | -1.061530 | 1.113105  |
| H | 1.209806  | 2.907291  | 4.719884  | H  | 1.775162  | -0.697687 | 0.964335  |
| H | -2.146087 | 4.809773  | 2.815991  | O  | 4.870575  | -1.362694 | 1.855863  |
| H | -0.793444 | 4.373710  | 4.859673  | O  | 2.764563  | -2.658282 | 1.660063  |
| C | -3.128802 | 0.432713  | -1.072787 | C  | 5.269344  | -2.471860 | 2.632256  |
| N | -2.720042 | -0.403262 | -0.189942 | H  | 5.653822  | -3.272400 | 1.976190  |
| O | -4.454023 | 0.532447  | -1.247803 | H  | 4.422130  | -2.903061 | 3.170051  |
| C | -5.102476 | -0.195521 | -0.119919 | C  | 6.337048  | -2.061280 | 3.650567  |
| C | -3.900127 | -1.087218 | 0.398125  | H  | 6.645604  | -2.925395 | 4.250688  |
| H | -3.821782 | -1.001708 | 1.481196  | H  | 7.244719  | -1.648790 | 3.185437  |
| C | -3.913577 | -2.566552 | 0.057784  | H  | 5.949860  | -1.292065 | 4.326329  |
| C | -3.936849 | -3.498647 | 1.101477  | C  | 1.521004  | -2.986772 | 2.234872  |
| C | -3.889403 | -3.030144 | -1.263556 | H  | 0.749806  | -2.267293 | 1.934568  |
| C | -3.949586 | -4.868986 | 0.832580  | H  | 1.199664  | -3.967863 | 1.843216  |
| H | -3.932705 | -3.149301 | 2.130527  | C  | 1.575574  | -3.051636 | 3.759493  |
| C | -3.905474 | -4.396171 | -1.534899 | H  | 1.847748  | -2.075650 | 4.174529  |
| H | -3.856282 | -2.324406 | -2.087188 | H  | 0.595408  | -3.325920 | 4.164612  |
| C | -3.936950 | -5.320274 | -0.487044 | H  | 2.311464  | -3.789593 | 4.098929  |
| H | -3.964866 | -5.579310 | 1.654163  | O  | 3.453113  | 0.646411  | 1.500308  |
| H | -3.888473 | -4.740675 | -2.564756 | C  | 4.559709  | 1.334527  | 2.062260  |
| H | -3.947745 | -6.385404 | -0.700351 | H  | 4.160977  | 2.181984  | 2.641620  |

H 5.094708 0.682765 2.757962  
C 5.533985 1.864863 1.005140  
H 5.098617 2.689499 0.429888  
H 6.447843 2.247163 1.479677  
H 5.793565 1.080285 0.286457  
C -6.289583 -0.972846 -0.662572  
C -7.067170 -1.724826 0.230487  
C -6.640082 -0.954597 -2.015687  
C -8.162224 -2.454547 -0.225244  
H -6.815046 -1.736891 1.286706  
C -7.742949 -1.682798 -2.470700  
H -6.052827 -0.370103 -2.714139  
C -8.504838 -2.436502 -1.579851  
H -8.749858 -3.036448 0.478684  
H -8.003264 -1.656864 -3.525042  
H -9.360401 -3.003679 -1.934541  
C -5.521945 0.904150 0.867598  
C -6.764169 1.539038 0.707241  
C -4.653985 1.373300 1.866423  
C -7.137053 2.599882 1.530944  
H -7.446079 1.199044 -0.064433  
C -5.030322 2.437258 2.689913  
H -3.677479 0.928190 2.027960  
C -6.271630 3.051658 2.529005  
H -8.106116 3.070972 1.392749  
H -4.340584 2.778442 3.456008  
H -6.563709 3.874866 3.174919  
C 1.049921 4.576408 -0.809061  
C 2.177452 4.956316 -0.067787  
C 0.200783 5.568190 -1.310728  
C 2.441621 6.302073 0.176035  
H 2.848277 4.200256 0.327600

C 0.469758 6.917192 -1.066556  
H -0.673787 5.289123 -1.886536  
C 1.588539 7.289140 -0.323149  
H 3.315334 6.578797 0.758610  
H -0.200593 7.675799 -1.460689  
H 1.796125 8.338133 -0.133415  
C 1.848379 2.616992 -2.132855  
C 1.604716 2.830344 -3.500602  
C 3.071946 2.052044 -1.745903  
C 2.561583 2.478988 -4.455187  
H 0.670019 3.281639 -3.815716  
C 4.035978 1.700666 -2.700991  
H 3.281906 1.832676 -0.704667  
C 3.779815 1.915717 -4.058001  
H 2.356041 2.651586 -5.508481  
H 4.936498 1.176606 -2.380385  
H 4.520118 1.630975 -4.800128  
O 4.095899 -2.308580 -2.739371  
P 4.895508 -1.867277 -1.497767  
O 5.467528 -3.055768 -0.688221  
O 5.883175 -0.699552 -1.647492  
O 3.611396 -1.264651 -0.538597  
K 2.130790 -0.735020 -2.773939  
K 7.232274 -1.498435 0.380596  
K 2.989482 -4.041453 -0.679114  
Br -1.329786 -0.509429 2.821968

**<sup>3</sup>TS3**

B3LYP/BSI SCF energy: -5391.370895 a.u.

M06/BSII SCF energy in solution: -5390.24287 a.u.

M06/BSII free energy in solution: -5389.399574 a.u.

|   |           |           |           |    |           |           |           |
|---|-----------|-----------|-----------|----|-----------|-----------|-----------|
| C | -1.014711 | 1.772281  | -1.280020 | H  | -3.891985 | -4.738477 | -2.581987 |
| N | -0.369857 | 1.200064  | -0.328787 | H  | -3.951660 | -6.387680 | -0.721553 |
| O | -0.518650 | 2.943883  | -1.715587 | C  | -2.275724 | 1.304411  | -1.995214 |
| C | 0.814997  | 3.104738  | -1.092019 | C  | -1.866911 | 0.465989  | -3.241696 |
| C | 0.675439  | 2.156328  | 0.153227  | H  | -1.223352 | 1.066805  | -3.891345 |
| H | 1.590249  | 1.596776  | 0.347786  | H  | -1.347766 | -0.448885 | -2.945816 |
| C | 0.223543  | 2.800837  | 1.456743  | H  | -2.763541 | 0.192840  | -3.805446 |
| C | 0.955050  | 2.543478  | 2.621131  | C  | -3.094092 | 2.536995  | -2.449138 |
| C | -0.914866 | 3.616648  | 1.531889  | H  | -3.994917 | 2.207107  | -2.967021 |
| C | 0.567010  | 3.110897  | 3.837123  | H  | -3.398274 | 3.154337  | -1.600222 |
| H | 1.807996  | 1.873505  | 2.566197  | H  | -2.496727 | 3.146435  | -3.127922 |
| C | -1.301477 | 4.180803  | 2.745734  | Ni | -0.749607 | -0.641911 | 0.457832  |
| H | -1.498085 | 3.830861  | 0.641405  | Br | -0.131927 | -2.409411 | -1.250120 |
| C | -0.557843 | 3.931756  | 3.902868  | Si | 3.276172  | -1.070710 | 1.112174  |
| H | 1.140395  | 2.898622  | 4.734868  | H  | 1.747597  | -0.719227 | 0.946675  |
| H | -2.180434 | 4.818091  | 2.787049  | O  | 4.856774  | -1.363793 | 1.847961  |
| H | -0.859062 | 4.372537  | 4.849185  | O  | 2.758991  | -2.670264 | 1.652766  |
| C | -3.121914 | 0.427669  | -1.080105 | C  | 5.262776  | -2.469019 | 2.625598  |
| N | -2.710203 | -0.410590 | -0.201811 | H  | 5.658065  | -3.265718 | 1.970956  |
| O | -4.447817 | 0.532825  | -1.249658 | H  | 4.417741  | -2.909621 | 3.159157  |
| C | -5.092471 | -0.196718 | -0.120590 | C  | 6.321810  | -2.050091 | 3.649835  |
| C | -3.889379 | -1.091973 | 0.389715  | H  | 6.637727  | -2.912973 | 4.247948  |
| H | -3.805715 | -1.009746 | 1.472753  | H  | 7.226514  | -1.625159 | 3.190131  |
| C | -3.907731 | -2.570637 | 0.045973  | H  | 5.923372  | -1.288068 | 4.327199  |
| C | -3.931277 | -3.505333 | 1.087367  | C  | 1.520177  | -3.016807 | 2.228626  |
| C | -3.886875 | -3.031134 | -1.276526 | H  | 0.738490  | -2.309090 | 1.929467  |
| C | -3.947563 | -4.874991 | 0.815092  | H  | 1.214394  | -4.002872 | 1.837271  |
| H | -3.924332 | -3.158496 | 2.117252  | C  | 1.577155  | -3.080721 | 3.753063  |
| C | -3.906443 | -4.396464 | -1.551246 | H  | 1.835099  | -2.100689 | 4.167481  |
| H | -3.853551 | -2.323412 | -2.098473 | H  | 0.601220  | -3.368676 | 4.158855  |
| C | -3.938191 | -5.323100 | -0.505639 | H  | 2.323640  | -3.808141 | 4.092017  |
| H | -3.962972 | -5.587294 | 1.634968  | O  | 3.407793  | 0.630463  | 1.529003  |



C 4.505133 1.319663 2.108742  
H 4.095051 2.160074 2.690182  
H 5.035839 0.665013 2.804709  
C 5.488027 1.863897 1.067149  
H 5.053845 2.689926 0.492952  
H 6.393605 2.248525 1.555298  
H 5.761582 1.086040 0.346581  
C -6.283666 -0.970305 -0.659725  
C -7.059521 -1.721938 0.235122  
C -6.639244 -0.949422 -2.011475  
C -8.157831 -2.448682 -0.217544  
H -6.803437 -1.736041 1.290364  
C -7.745360 -1.674596 -2.463420  
H -6.053273 -0.365173 -2.711216  
C -8.505525 -2.427965 -1.570814  
H -8.744046 -3.030355 0.487764  
H -8.009564 -1.646585 -3.516751  
H -9.363643 -2.992790 -1.923096  
C -5.505375 0.901125 0.871736  
C -6.745197 1.541773 0.715402  
C -4.634324 1.362631 1.871378  
C -7.112913 2.600669 1.543839  
H -7.429311 1.207619 -0.056908  
C -5.005592 2.424609 2.699808  
H -3.659267 0.913222 2.029933  
C -6.244576 3.044647 2.542933  
H -8.080210 3.076277 1.408684  
H -4.313460 2.759717 3.466373  
H -6.532678 3.866219 3.192728  
C 1.041556 4.583740 -0.804225  
C 2.160328 4.968018 -0.052136  
C 0.196572 5.572233 -1.319288

C 2.419754 6.315110 0.189517  
H 2.827950 4.214396 0.353248  
C 0.460714 6.922518 -1.077095  
H -0.671067 5.289688 -1.903869  
C 1.570637 7.298911 -0.322693  
H 3.286592 6.595422 0.780569  
H -0.206380 7.678638 -1.481368  
H 1.774457 8.348915 -0.134522  
C 1.850572 2.627188 -2.124510  
C 1.611237 2.845218 -3.492346  
C 3.073366 2.062276 -1.735537  
C 2.571888 2.498651 -4.444846  
H 0.677114 3.296558 -3.809154  
C 4.041289 1.715694 -2.688383  
H 3.279907 1.839388 -0.694573  
C 3.789517 1.935612 -4.045406  
H 2.369790 2.674883 -5.498204  
H 4.940885 1.190931 -2.366079  
H 4.532749 1.654542 -4.785994  
O 4.100928 -2.280458 -2.746024  
P 4.891715 -1.846580 -1.496223  
O 5.463134 -3.040080 -0.693908  
O 5.877232 -0.675202 -1.631830  
O 3.600117 -1.254166 -0.540038  
K 2.129427 -0.718723 -2.783717  
K 7.227107 -1.490533 0.386506  
K 2.991644 -4.036428 -0.700406  
Br -1.309245 -0.533541 2.825455

<sup>1</sup>[Ni<sup>II</sup>]BrH

B3LYP/BSI SCF energy: -2182.645637a.u.

M06/BSII SCF energy in solution: -2181.670491a.u.

M06/BSII free energy in solution: -2181.030793a.u.

|    |           |           |           |   |           |           |           |
|----|-----------|-----------|-----------|---|-----------|-----------|-----------|
| C  | 1.329783  | 0.055528  | 0.972772  | H | -4.771136 | -5.099033 | 2.632328  |
| N  | 1.476659  | -0.377814 | -0.228160 | C | -4.539979 | 0.850367  | 1.002188  |
| O  | 2.408753  | 0.637371  | 1.535416  | C | -5.753986 | 0.626093  | 0.336652  |
| C  | 3.376380  | 0.884360  | 0.451371  | C | -4.404054 | 1.992837  | 1.796406  |
| C  | 2.894350  | -0.168887 | -0.621392 | C | -6.804747 | 1.532770  | 0.455417  |
| C  | -1.160974 | -0.061761 | 1.039638  | H | -5.878778 | -0.265903 | -0.270338 |
| N  | -1.280916 | -0.332300 | -0.206920 | C | -5.462238 | 2.896897  | 1.921485  |
| O  | -2.286013 | 0.221187  | 1.722664  | H | -3.472737 | 2.172745  | 2.320123  |
| C  | -3.416541 | -0.155710 | 0.824851  | C | -6.663251 | 2.672886  | 1.250474  |
| C  | -2.699690 | -0.113250 | -0.576409 | H | -7.736751 | 1.345965  | -0.070046 |
| Ni | 0.164938  | -1.166398 | -1.356382 | H | -5.342573 | 3.777426  | 2.546435  |
| C  | 0.110696  | -0.077129 | 1.866349  | H | -7.484446 | 3.377099  | 1.347016  |
| C  | 0.074936  | 1.070632  | 2.901836  | C | 4.783238  | 0.688776  | 1.005362  |
| H  | 0.960846  | 1.026075  | 3.537218  | C | 5.886957  | 0.988746  | 0.195143  |
| H  | 0.054466  | 2.048973  | 2.413660  | C | 5.005749  | 0.227899  | 2.307147  |
| H  | -0.814401 | 0.972751  | 3.525459  | C | 7.184575  | 0.820333  | 0.672973  |
| C  | 0.184976  | -1.448167 | 2.602372  | H | 5.734241  | 1.365733  | -0.811256 |
| H  | -0.696623 | -1.568538 | 3.236965  | C | 6.307566  | 0.068842  | 2.787971  |
| H  | 0.218483  | -2.273070 | 1.886806  | H | 4.162627  | -0.002329 | 2.947361  |
| H  | 1.077791  | -1.482591 | 3.233412  | C | 7.400677  | 0.360963  | 1.974051  |
| C  | -3.825009 | -1.568012 | 1.268717  | H | 8.027510  | 1.054012  | 0.029243  |
| C  | -4.575997 | -1.706943 | 2.448318  | H | 6.462683  | -0.285712 | 3.802997  |
| C  | -3.410173 | -2.727067 | 0.596293  | H | 8.412215  | 0.235377  | 2.348760  |
| C  | -4.912186 | -2.966538 | 2.938113  | C | 3.172280  | 2.344065  | 0.008569  |
| H  | -4.902963 | -0.819519 | 2.980799  | C | 2.917848  | 3.313414  | 0.991996  |
| C  | -3.753607 | -3.990176 | 1.088447  | C | 3.297637  | 2.761187  | -1.321708 |
| H  | -2.819307 | -2.676457 | -0.312610 | C | 2.771193  | 4.655950  | 0.650538  |
| C  | -4.503741 | -4.115657 | 2.255982  | H | 2.835969  | 3.009634  | 2.029954  |
| H  | -5.497822 | -3.050670 | 3.849269  | C | 3.155813  | 4.109155  | -1.663501 |
| H  | -3.428107 | -4.873613 | 0.547165  | H | 3.507779  | 2.049692  | -2.113100 |
|    |           |           |           | C | 2.888103  | 5.060163  | -0.681463 |
|    |           |           |           | H | 2.570510  | 5.388367  | 1.427286  |

H 3.250367 4.407942 -2.703222  
H 2.774227 6.106461 -0.949054  
C -2.848405 1.158457 -1.397192  
C -3.577841 1.114924 -2.590833  
C -2.269080 2.372428 -1.005741  
C -3.739620 2.261574 -3.369988  
H -4.004824 0.172528 -2.921283  
C -2.428044 3.519296 -1.782464  
H -1.684698 2.427361 -0.092211  
C -3.166529 3.467672 -2.966771  
H -4.303791 2.207179 -4.296510  
H -1.972474 4.452753 -1.464098  
H -3.286866 4.360276 -3.574124  
H -3.021884 -0.944665 -1.200842  
H 2.895506 0.270769 -1.615808  
C 3.664354 -1.475492 -0.687416  
C 4.459434 -1.740058 -1.807399  
C 3.612608 -2.422903 0.342239  
C 5.193335 -2.923199 -1.899261  
H 4.491268 -1.023014 -2.623863  
C 4.342609 -3.606892 0.252771  
H 2.992532 -2.245392 1.215292  
C 5.136655 -3.860284 -0.867780  
H 5.797871 -3.115808 -2.780684  
H 4.287927 -4.335234 1.056771  
H 5.700463 -4.785817 -0.938777  
H 1.213556 -1.763189 -2.136277  
Br -1.277011 -2.324161 -2.825239

**<sup>3</sup>[Ni<sup>II</sup>]BrH**

B3LYP/BSI SCF energy: -2182.645627a.u.

M06/BSII SCF energy in solution: -2181.659343a.u.

M06/BSII free energy in solution: -2181.025069a.u.

C 1.204308 0.195670 0.922345  
N 1.436948 -0.224781 -0.262416  
O 2.196596 0.863301 1.537696  
C 3.305666 1.036299 0.583741  
C 2.786152 0.198102 -0.675819  
C -1.304402 0.007871 0.891207  
N -1.410955 -0.265775 -0.355516  
O -2.436690 0.279439 1.559421  
C -3.578246 -0.017608 0.655117  
C -2.831985 -0.171184 -0.745758  
Ni 0.075931 -1.068959 -1.555561  
C -0.050132 -0.027214 1.754514  
C -0.150563 1.037202 2.870504  
H 0.721558 0.973729 3.522626  
H -0.195396 2.049503 2.459233  
H -1.048578 0.860876 3.463073  
C 0.031208 -1.450421 2.386972  
H -0.862984 -1.630791 2.989253  
H 0.098680 -2.220682 1.614566  
H 0.907156 -1.512085 3.039511  
C -4.173479 -1.334118 1.174833  
C -5.212854 -1.313003 2.118039  
C -3.628001 -2.575069 0.808265  
C -5.709727 -2.497407 2.661081  
H -5.640060 -0.365734 2.426995  
C -4.126886 -3.759345 1.353699  
H -2.800980 -2.650230 0.108878  
C -5.171558 -3.726599 2.277185  
H -6.519480 -2.456812 3.384129  
H -3.689213 -4.705381 1.049256

H -5.561532 -4.649868 2.696221  
C -4.557097 1.144427 0.725661  
C -5.747947 1.077170 -0.013351  
C -4.311182 2.277708 1.506533  
C -6.664305 2.125330 0.020370  
H -5.960799 0.198430 -0.614322  
C -5.233429 3.327359 1.542749  
H -3.400950 2.338063 2.091021  
C -6.410030 3.257076 0.799439  
H -7.578662 2.057365 -0.561750  
H -5.027535 4.199161 2.157343  
H -7.125804 4.073446 0.827255  
C 4.576026 0.502369 1.249655  
C 5.833551 0.812668 0.714189  
C 4.512535 -0.314279 2.384562  
C 6.996645 0.307190 1.292096  
H 5.909281 1.457448 -0.154740  
C 5.678804 -0.812904 2.968238  
H 3.550827 -0.553808 2.822004  
C 6.924962 -0.507456 2.423425  
H 7.961033 0.556673 0.859300  
H 5.608064 -1.441321 3.851474  
H 7.831957 -0.896690 2.876509  
C 3.415791 2.540221 0.308451  
C 3.156918 3.447257 1.347050  
C 3.830875 3.043325 -0.930535  
C 3.291153 4.819369 1.144103  
H 2.845215 3.073532 2.315966  
C 3.974436 4.418660 -1.131140  
H 4.050197 2.371991 -1.754287  
C 3.700828 5.311777 -0.096983  
H 3.078124 5.505189 1.959136

H 4.295022 4.786392 -2.101409  
H 3.805987 6.381073 -0.254754  
C -3.049652 0.910164 -1.788399  
C -3.793333 0.613433 -2.935383  
C -2.514257 2.195669 -1.642705  
C -4.011481 1.584086 -3.914683  
H -4.195938 -0.387635 -3.069371  
C -2.728722 3.166212 -2.619103  
H -1.920293 2.438065 -0.766878  
C -3.480248 2.863922 -3.757410  
H -4.586523 1.335585 -4.801954  
H -2.304773 4.158478 -2.494358  
H -3.643027 3.620197 -4.519906  
H -3.121094 -1.123313 -1.194299  
H 2.648293 0.873813 -1.521614  
C 3.638153 -0.965069 -1.146354  
C 4.472834 -0.796843 -2.257886  
C 3.608916 -2.208516 -0.503802  
C 5.280326 -1.841637 -2.707960  
H 4.482051 0.153245 -2.786969  
C 4.410050 -3.256329 -0.956262  
H 2.940337 -2.369488 0.335099  
C 5.251732 -3.074558 -2.055074  
H 5.918692 -1.695919 -3.574570  
H 4.367110 -4.218709 -0.455404  
H 5.871483 -3.893486 -2.408491  
H 0.248263 -0.090318 -2.747041  
Br -0.314202 -3.480086 -1.199855

**BrK<sub>3</sub>PO<sub>4</sub>[Si]**

B3LYP/BSI SCF energy: -3208.752259a.u.

M06/BSII SCF energy in solution: -3208.585194a.u.

M06/BSII free energy in solution: -3208.414987a.u.

Br -4.175565 0.537597 0.381420  
O 1.412013 -2.130324 -1.182153  
P 0.140546 -1.666137 -0.479825  
O -1.215664 -1.849619 -1.171699  
O 0.103004 -2.031967 1.024723  
O 0.266908 0.070197 -0.483491  
K 2.668914 -2.444028 1.023684  
K -2.537379 -2.077066 1.132977  
K -2.040880 0.444287 -1.931650  
Si 1.488364 1.083197 -0.109875  
O 2.735919 0.296042 0.692599  
O 0.978601 2.267443 0.909248  
C 3.762302 1.094653 1.305377  
H 3.304691 1.797302 2.010541  
H 4.281309 1.681461 0.536543  
C 4.750619 0.189156 2.025078  
H 5.547137 0.782194 2.485516  
H 4.256025 -0.374121 2.825913  
H 5.223184 -0.512629 1.326853  
C -0.329403 2.850428 0.916577  
H -0.463848 3.455961 0.007831  
H -1.092477 2.062298 0.920495  
C -0.477600 3.728457 2.147805  
H 0.272579 4.525220 2.148484  
H -1.473269 4.182886 2.167611  
H -0.351956 3.134091 3.057937  
O 2.088778 1.838325 -1.449591  
C 2.899195 1.237567 -2.465590  
H 3.384132 2.065908 -2.994572  
H 3.691687 0.634372 -2.000739

C 2.098051 0.376488 -3.435442  
H 1.282092 0.961934 -3.876196  
H 2.745909 0.039986 -4.253492  
H 1.694387 -0.507395 -2.931924

#### HBr

B3LYP/BSI SCF energy: -13.97872a.u.

M06/BSII SCF energy in solution: -13.953162a.u.

M06/BSII free energy in solution: -13.966665a.u.

Br 0.000000 0.000000 0.039674  
H 0.000000 0.000000 -1.388590

#### <sup>1</sup>TS4

B3LYP/BSI SCF energy: -5378.498223 a.u.

M06/BSII SCF energy in solution: -5377.392703 a.u.

M06/BSII free energy in solution: -5376.541218 a.u.

C -0.931146 1.988218 -1.182150  
N -0.285981 1.412477 -0.246109  
O -0.470449 3.208937 -1.588554  
C 0.829590 3.391571 -0.914387  
C 0.670278 2.408381 0.297521  
H 1.601191 1.893836 0.529337  
C 0.088208 2.958143 1.598476  
C 0.474295 2.349480 2.799453  
C -0.869788 3.981809 1.636614  
C -0.048123 2.788515 4.017806  
H 1.153286 1.504059 2.762912  
C -1.387202 4.423066 2.854468  
H -1.205638 4.453581 0.720256  
C -0.969872 3.835641 4.051228

|    |           |           |           |   |           |           |           |
|----|-----------|-----------|-----------|---|-----------|-----------|-----------|
| H  | 0.264331  | 2.306352  | 4.940043  | H | 1.066482  | -1.045250 | 0.779887  |
| H  | -2.115992 | 5.228600  | 2.866401  | O | 4.259328  | -2.045677 | 2.101958  |
| H  | -1.365539 | 4.188480  | 4.999991  | O | 2.033398  | -3.076285 | 1.535722  |
| C  | -2.912563 | 0.480838  | -0.945666 | C | 4.572145  | -3.326474 | 2.611901  |
| N  | -2.406306 | -0.450471 | -0.222308 | H | 5.103777  | -3.907170 | 1.839118  |
| O  | -4.257590 | 0.598420  | -0.934471 | H | 3.663002  | -3.887666 | 2.844921  |
| C  | -4.768159 | -0.250234 | 0.163326  | C | 5.423926  | -3.215818 | 3.878445  |
| C  | -3.510603 | -1.175844 | 0.448484  | H | 5.684537  | -4.212738 | 4.252518  |
| H  | -3.296432 | -1.169717 | 1.516787  | H | 6.365524  | -2.671596 | 3.714341  |
| C  | -3.604467 | -2.630083 | 0.024968  | H | 4.881592  | -2.682767 | 4.665625  |
| C  | -3.684765 | -3.616303 | 1.015565  | C | 0.743094  | -3.442334 | 2.012620  |
| C  | -3.630607 | -3.020435 | -1.318543 | H | -0.033106 | -2.920612 | 1.439995  |
| C  | -3.803577 | -4.965022 | 0.675667  | H | 0.639169  | -4.519863 | 1.824769  |
| H  | -3.651341 | -3.325143 | 2.062741  | C | 0.566776  | -3.144487 | 3.496245  |
| C  | -3.750625 | -4.365651 | -1.662056 | H | 0.621445  | -2.065843 | 3.670789  |
| H  | -3.539244 | -2.276446 | -2.101890 | H | -0.414978 | -3.493467 | 3.836942  |
| C  | -3.840105 | -5.342083 | -0.667205 | H | 1.336220  | -3.641839 | 4.097307  |
| H  | -3.864676 | -5.716544 | 1.457941  | O | 2.563331  | -0.162249 | 2.273871  |
| H  | -3.764013 | -4.652121 | -2.709522 | C | 3.554754  | 0.412385  | 3.125772  |
| H  | -3.932800 | -6.390148 | -0.938270 | H | 3.018397  | 0.970027  | 3.904926  |
| C  | -2.202654 | 1.491183  | -1.854672 | H | 4.139325  | -0.371069 | 3.613287  |
| C  | -1.864485 | 0.809835  | -3.209329 | C | 4.476936  | 1.359157  | 2.359303  |
| H  | -1.321748 | 1.513697  | -3.848176 | H | 3.917405  | 2.222111  | 1.980220  |
| H  | -1.270932 | -0.095767 | -3.061956 | H | 5.267589  | 1.743575  | 3.016527  |
| H  | -2.791533 | 0.533424  | -3.720913 | H | 4.934663  | 0.855114  | 1.500982  |
| C  | -3.126858 | 2.707445  | -2.111890 | C | -6.007446 | -0.983017 | -0.325373 |
| H  | -4.044826 | 2.378905  | -2.600221 | C | -6.715892 | -1.797784 | 0.570589  |
| H  | -3.398851 | 3.211452  | -1.181290 | C | -6.466075 | -0.871051 | -1.641189 |
| H  | -2.616227 | 3.421298  | -2.759972 | C | -7.849193 | -2.492331 | 0.155057  |
| Ni | -0.464212 | -0.788322 | 0.322108  | H | -6.379804 | -1.885589 | 1.599307  |
| Br | -0.132998 | -2.358193 | -1.959647 | C | -7.606475 | -1.564292 | -2.056166 |
| Si | 2.761776  | -1.558814 | 1.339943  | H | -5.932530 | -0.238621 | -2.340637 |

C -8.300219 -2.378070 -1.162498  
H -8.381599 -3.122508 0.861602  
H -7.949811 -1.463803 -3.081976  
H -9.185577 -2.917688 -1.486034  
C -5.071919 0.720071 1.317036  
C -6.338227 1.318323 1.412568  
C -4.079564 1.109070 2.231473  
C -6.614941 2.256907 2.405736  
H -7.115653 1.043590 0.708337  
C -4.358706 2.049130 3.225908  
H -3.075004 0.700273 2.180329  
C -5.626510 2.622140 3.320782  
H -7.605259 2.699971 2.463743  
H -3.572309 2.334673 3.917094  
H -5.842299 3.349359 4.098630  
C 1.031337 4.874287 -0.624832  
C 2.017228 5.277990 0.285430  
C 0.303380 5.852604 -1.312513  
C 2.262571 6.631172 0.510640  
H 2.589887 4.535158 0.831967  
C 0.549062 7.208161 -1.083446  
H -0.463395 5.554388 -2.018293  
C 1.528934 7.602937 -0.173132  
H 3.025580 6.925237 1.225395  
H -0.028828 7.954713 -1.620962  
H 1.719774 8.657355 0.003632  
C 1.936385 2.941301 -1.888076  
C 1.747960 3.077693 -3.272858  
C 3.172667 2.464176 -1.425577  
C 2.766680 2.733921 -4.166507  
H 0.803270 3.455284 -3.648564  
C 4.188665 2.100723 -2.316327

H 3.357136 2.330249 -0.365935  
C 3.987261 2.241160 -3.692481  
H 2.601746 2.846850 -5.234803  
H 5.088755 1.631881 -1.927144  
H 4.767474 1.947301 -4.388036  
O 4.093401 -1.738360 -2.545771  
P 4.683746 -1.650817 -1.132947  
O 5.148388 -3.018351 -0.581038  
O 5.635682 -0.491066 -0.811190  
O 3.235269 -1.306739 -0.236856  
K 2.081509 -0.239708 -2.581900  
K 6.811217 -1.825137 1.005659  
K 2.651485 -3.912543 -1.217164  
H -0.848086 -0.750783 1.776602

### <sup>3</sup>TS4

B3LYP/BSI SCF energy: -5378.508531 a.u.

M06/BSII SCF energy in solution: -5377.397761 a.u.

M06/BSII free energy in solution: -5376.546104 a.u.

C -0.909219 1.922772 -1.188908  
N -0.280245 1.373880 -0.216922  
O -0.435437 3.119446 -1.607540  
C 0.865736 3.312257 -0.925968  
C 0.679836 2.379967 0.318201  
H 1.597178 1.857566 0.584085  
C 0.085582 2.988274 1.585735  
C 0.511598 2.485943 2.821393  
C -0.916984 3.969071 1.562171  
C -0.025042 2.980805 4.011544  
H 1.234864 1.677604 2.835088  
C -1.451151 4.464168 2.751703

|    |           |           |           |    |           |           |           |
|----|-----------|-----------|-----------|----|-----------|-----------|-----------|
| H  | -1.274742 | 4.367099  | 0.619040  | Br | -0.087261 | -2.649083 | -2.024821 |
| C  | -1.000934 | 3.977353  | 3.981645  | Si | 2.746017  | -1.410187 | 1.317638  |
| H  | 0.316840  | 2.579605  | 4.961470  | H  | 1.198689  | -0.877514 | 0.784651  |
| H  | -2.215850 | 5.234954  | 2.715928  | O  | 4.201779  | -1.937301 | 2.148801  |
| H  | -1.411287 | 4.370993  | 4.907728  | O  | 1.987198  | -2.926363 | 1.571931  |
| C  | -2.927084 | 0.473219  | -0.981080 | C  | 4.471924  | -3.212589 | 2.693138  |
| N  | -2.451774 | -0.430526 | -0.207069 | H  | 4.999953  | -3.827067 | 1.944152  |
| O  | -4.261422 | 0.633880  | -1.000501 | H  | 3.544044  | -3.740497 | 2.929075  |
| C  | -4.833312 | -0.192536 | 0.089502  | C  | 5.307735  | -3.093523 | 3.970154  |
| C  | -3.568073 | -1.064395 | 0.525443  | H  | 5.523126  | -4.086980 | 4.380628  |
| H  | -3.379500 | -0.901181 | 1.587208  | H  | 6.273483  | -2.592717 | 3.806949  |
| C  | -3.644629 | -2.565116 | 0.323288  | H  | 4.772983  | -2.514297 | 4.729517  |
| C  | -3.868991 | -3.381080 | 1.440337  | C  | 0.658516  | -3.250909 | 1.925436  |
| C  | -3.509618 | -3.161933 | -0.934643 | H  | -0.063335 | -2.674780 | 1.325092  |
| C  | -3.980908 | -4.765116 | 1.303067  | H  | 0.501798  | -4.305153 | 1.658097  |
| H  | -3.955035 | -2.928193 | 2.425443  | C  | 0.376412  | -3.034427 | 3.407055  |
| C  | -3.617723 | -4.545137 | -1.074007 | H  | 0.461828  | -1.973187 | 3.658546  |
| H  | -3.287858 | -2.554329 | -1.804135 | H  | -0.642165 | -3.357922 | 3.649421  |
| C  | -3.859393 | -5.349804 | 0.041281  | H  | 1.077965  | -3.605377 | 4.025075  |
| H  | -4.155860 | -5.383336 | 2.179195  | O  | 2.686992  | 0.076701  | 2.159877  |
| H  | -3.498835 | -4.993379 | -2.055704 | C  | 3.709953  | 0.621989  | 2.989795  |
| H  | -3.942438 | -6.427283 | -0.071224 | H  | 3.214767  | 1.262926  | 3.732482  |
| C  | -2.147092 | 1.404404  | -1.909335 | H  | 4.228686  | -0.174546 | 3.527666  |
| C  | -1.722159 | 0.612376  | -3.177476 | C  | 4.710337  | 1.452405  | 2.185561  |
| H  | -1.100976 | 1.247320  | -3.817304 | H  | 4.235694  | 2.353658  | 1.779994  |
| H  | -1.183840 | -0.303396 | -2.916683 | H  | 5.540820  | 1.782416  | 2.823558  |
| H  | -2.614650 | 0.330716  | -3.744246 | H  | 5.105924  | 0.880432  | 1.338739  |
| C  | -3.025765 | 2.608938  | -2.323164 | C  | -5.991817 | -0.997008 | -0.480640 |
| H  | -3.923218 | 2.251965  | -2.829362 | C  | -6.780530 | -1.772808 | 0.382571  |
| H  | -3.336930 | 3.200530  | -1.458845 | C  | -6.288332 | -0.999876 | -1.847083 |
| H  | -2.467164 | 3.251824  | -3.004857 | C  | -7.835255 | -2.536310 | -0.112018 |
| Ni | -0.477036 | -0.544892 | 0.526584  | H  | -6.569417 | -1.777312 | 1.447255  |



C -7.348604 -1.763629 -2.342263  
H -5.691807 -0.401607 -2.525288  
C -8.124362 -2.534765 -1.478829  
H -8.431716 -3.133456 0.571585  
H -7.564665 -1.751860 -3.406817  
H -8.947518 -3.129268 -1.864354  
C -5.260955 0.817645 1.165145  
C -6.572425 1.315291 1.195277  
C -4.324429 1.351040 2.066206  
C -6.945930 2.294875 2.115424  
H -7.308712 0.932617 0.497840  
C -4.698682 2.333473 2.984246  
H -3.290645 1.018688 2.063959  
C -6.011249 2.804903 3.017072  
H -7.969696 2.658258 2.124718  
H -3.952637 2.729409 3.666222  
H -6.302565 3.565382 3.736177  
C 1.072840 4.800081 -0.674387  
C 2.076213 5.215786 0.210976  
C 0.333902 5.767168 -1.365317  
C 2.327141 6.571883 0.409707  
H 2.659718 4.480290 0.756101  
C 0.586412 7.125894 -1.163291  
H -0.446084 5.460029 -2.052561  
C 1.582582 7.533453 -0.276874  
H 3.103865 6.876324 1.104969  
H 0.000483 7.864603 -1.702812  
H 1.778176 8.590243 -0.120974  
C 1.964371 2.820104 -1.887443  
C 1.794143 2.980048 -3.272909  
C 3.175867 2.291384 -1.418559  
C 2.808836 2.611659 -4.160345

H 0.869340 3.398487 -3.655106  
C 4.190874 1.909518 -2.303840  
H 3.343067 2.130714 -0.360178  
C 4.008310 2.075045 -3.679407  
H 2.658649 2.743359 -5.228701  
H 5.070397 1.405554 -1.907818  
H 4.786877 1.766186 -4.370379  
O 4.187178 -1.815367 -2.526677  
P 4.744700 -1.674348 -1.104681  
O 5.195423 -3.018483 -0.485023  
O 5.700950 -0.508942 -0.807166  
O 3.283304 -1.288433 -0.262991  
K 2.083353 -0.434978 -2.614918  
K 6.783364 -1.763147 1.126164  
K 2.747408 -3.972699 -1.104796  
H -0.936467 -0.374695 2.015333

#### <sup>1</sup>TS4a

B3LYP/BSI SCF energy: -2418.491324a.u.  
M06/BSII SCF energy in solution: -2417.376192a.u.  
M06/BSII free energy in solution: -2416.58007a.u.

C -1.318081 -1.335794 0.452540  
N -1.440433 -0.256875 -0.227607  
O -2.451877 -1.903220 0.904260  
C -3.607742 -1.148413 0.376197  
C -2.875698 0.070784 -0.357254  
C 1.208232 -1.344695 0.634752  
N 1.463575 -0.395910 -0.177681  
O 2.213237 -1.757684 1.448545  
C 3.311302 -0.794283 1.320824  
C 2.865861 0.007386 0.007166

|    |           |           |           |   |           |           |           |
|----|-----------|-----------|-----------|---|-----------|-----------|-----------|
| Ni | -0.095462 | 0.744255  | -1.296509 | C | -4.311608 | -2.104131 | -0.598631 |
| C  | -0.072115 | -2.155110 | 0.759276  | C | -3.764415 | -2.346138 | -1.869560 |
| C  | -0.187469 | -2.755394 | 2.181229  | C | -5.444899 | -2.832972 | -0.208576 |
| H  | -1.098757 | -3.348935 | 2.257085  | C | -4.354607 | -3.270094 | -2.732362 |
| H  | -0.212853 | -1.973958 | 2.946658  | H | -2.865813 | -1.835434 | -2.206688 |
| H  | 0.670698  | -3.398435 | 2.379722  | C | -6.033889 | -3.755344 | -1.074509 |
| C  | -0.013646 | -3.307030 | -0.290806 | H | -5.875140 | -2.681243 | 0.774462  |
| H  | 0.867676  | -3.926314 | -0.099856 | C | -5.494439 | -3.974073 | -2.342124 |
| H  | 0.032637  | -2.901912 | -1.304661 | H | -3.913996 | -3.434422 | -3.711341 |
| H  | -0.905509 | -3.931989 | -0.197043 | H | -6.915418 | -4.303003 | -0.753154 |
| C  | 4.604660  | -1.601399 | 1.212678  | H | -5.955127 | -4.689629 | -3.017409 |
| C  | 5.807099  | -1.142927 | 1.764326  | C | -4.481331 | -0.737754 | 1.555315  |
| C  | 4.605678  | -2.825703 | 0.528024  | C | -4.124984 | -1.026389 | 2.876317  |
| C  | 6.983049  | -1.883161 | 1.626440  | C | -5.679192 | -0.045556 | 1.317095  |
| H  | 5.831064  | -0.209287 | 2.314803  | C | -4.941123 | -0.623426 | 3.937365  |
| C  | 5.777810  | -3.567660 | 0.397053  | H | -3.210912 | -1.572024 | 3.076597  |
| H  | 3.683793  | -3.203533 | 0.101618  | C | -6.490485 | 0.357962  | 2.374586  |
| C  | 6.973671  | -3.098402 | 0.943828  | H | -5.978474 | 0.177861  | 0.298128  |
| H  | 7.904482  | -1.508817 | 2.063323  | C | -6.123667 | 0.071335  | 3.692121  |
| H  | 5.755497  | -4.514527 | -0.134754 | H | -4.647925 | -0.859063 | 4.956588  |
| H  | 7.887126  | -3.676975 | 0.840943  | H | -7.410990 | 0.896524  | 2.168914  |
| C  | 3.276055  | 0.094631  | 2.571290  | H | -6.757045 | 0.385043  | 4.516819  |
| C  | 3.777348  | 1.403684  | 2.560019  | C | 0.969336  | 2.021734  | -2.409011 |
| C  | 2.785413  | -0.419194 | 3.780140  | H | 0.810317  | 1.656461  | -3.416064 |
| C  | 3.778272  | 2.181759  | 3.720009  | H | 2.006822  | 2.090734  | -2.085329 |
| H  | 4.182024  | 1.830051  | 1.647077  | C | -0.004982 | 2.798375  | -1.758659 |
| C  | 2.778448  | 0.359768  | 4.937083  | H | -0.201933 | 1.793609  | -0.325436 |
| H  | 2.405611  | -1.433815 | 3.809761  | H | -0.964858 | 2.924266  | -2.260459 |
| C  | 3.273954  | 1.664503  | 4.912637  | C | 0.346458  | 3.942046  | -0.817731 |
| H  | 4.171330  | 3.193740  | 3.685523  | H | 1.257838  | 3.692730  | -0.259020 |
| H  | 2.387421  | -0.057010 | 5.861005  | H | -0.451238 | 4.088888  | -0.079855 |
| H  | 3.268634  | 2.270640  | 5.813772  | C | 0.565814  | 5.253230  | -1.593756 |

H 1.369649 5.107977 -2.327989  
H -0.338465 5.487791 -2.173071  
C 0.907332 6.441073 -0.685067  
H 1.810156 6.204383 -0.105171  
H 0.102262 6.577825 0.049932  
C 1.123171 7.747316 -1.455996  
H 1.945662 7.652632 -2.174070  
H 1.364171 8.575729 -0.781542  
H 0.225603 8.027180 -2.019221  
C 3.705693 -0.189010 -1.245743  
C 3.282196 -1.001057 -2.302938  
C 4.932416 0.481734 -1.355959  
C 4.079348 -1.150574 -3.440360  
H 2.309093 -1.477170 -2.264050  
C 5.731179 0.326818 -2.487466  
H 5.272014 1.126773 -0.548705  
C 5.306502 -0.494849 -3.534490  
H 3.727183 -1.772976 -4.257757  
H 6.680315 0.851253 -2.554000  
H 5.923764 -0.612277 -4.420672  
C -3.189377 1.474964 0.122864  
C -3.980027 2.308592 -0.676289  
C -2.706062 1.968807 1.341628  
C -4.299536 3.603714 -0.261962  
H -4.345771 1.942067 -1.632532  
C -3.020615 3.261789 1.756944  
H -2.078980 1.340514 1.966292  
C -3.821780 4.082770 0.957894  
H -4.915185 4.236422 -0.894965  
H -2.641088 3.629422 2.706142  
H -4.066826 5.089677 1.283586  
H -3.112998 0.029629 -1.421976

H 2.868787 1.073715 0.242229  
Br -0.512099 -0.787962 -3.277934

### <sup>3</sup>TS4a

B3LYP/BSI SCF energy: -2418.48256a.u.  
M06/BSII SCF energy in solution: -2417.359458a.u.  
M06/BSII free energy in solution: -2416.56805a.u.

C -1.565868 -1.139274 0.555993  
N -1.567989 -0.145807 -0.244801  
O -2.748653 -1.541541 1.058499  
C -3.817314 -0.734147 0.425733  
C -2.957404 0.307697 -0.437328  
C 0.945190 -1.311698 0.768260  
N 1.296492 -0.441536 -0.107829  
O 1.908855 -1.742453 1.610191  
C 3.057469 -0.836711 1.461299  
C 2.754405 -0.226349 0.028335  
Ni 0.048417 0.529554 -1.465643  
C -0.391303 -2.018583 0.945747  
C -0.554835 -2.494593 2.408128  
H -1.510869 -3.007094 2.517908  
H -0.526134 -1.655031 3.108760  
H 0.248505 -3.184915 2.667953  
C -0.408747 -3.250452 -0.012253  
H 0.424185 -3.917294 0.228509  
H -0.338522 -2.933311 -1.055990  
H -1.344604 -3.797898 0.125549  
C 4.325191 -1.677801 1.588510  
C 5.516648 -1.116586 2.065254  
C 4.323800 -3.025511 1.203370  
C 6.681313 -1.881316 2.145247

|   |           |           |           |   |           |           |           |
|---|-----------|-----------|-----------|---|-----------|-----------|-----------|
| H | 5.538568  | -0.081310 | 2.387448  | C | -5.100967 | 0.349786  | 3.877485  |
| C | 5.485466  | -3.790995 | 1.292635  | H | -3.475346 | -0.868350 | 3.164013  |
| H | 3.409794  | -3.477662 | 0.837612  | C | -6.533750 | 1.290467  | 2.183824  |
| C | 6.670466  | -3.221886 | 1.761466  | H | -6.033307 | 0.812376  | 0.152141  |
| H | 7.594820  | -1.426951 | 2.517958  | C | -6.204343 | 1.127382  | 3.531988  |
| H | 5.462498  | -4.834828 | 0.993250  | H | -4.838127 | 0.209356  | 4.922281  |
| H | 7.575127  | -3.818931 | 1.830045  | H | -7.392129 | 1.892489  | 1.900260  |
| C | 2.944045  | 0.207922  | 2.582375  | H | -6.805317 | 1.600532  | 4.303153  |
| C | 3.415740  | 1.518626  | 2.436353  | C | 1.566933  | 1.567213  | -2.858605 |
| C | 2.412583  | -0.175193 | 3.823035  | H | 1.161156  | 1.208332  | -3.795125 |
| C | 3.341862  | 2.428135  | 3.494639  | H | 2.568751  | 1.245352  | -2.594413 |
| H | 3.853860  | 1.849375  | 1.500113  | C | 0.925330  | 2.566819  | -2.120895 |
| C | 2.332820  | 0.733359  | 4.877135  | H | 0.003750  | 2.010192  | -0.847448 |
| H | 2.059710  | -1.191220 | 3.958387  | H | 0.047778  | 3.020550  | -2.583202 |
| C | 2.795608  | 2.040978  | 4.717000  | C | 1.704731  | 3.526654  | -1.233570 |
| H | 3.709732  | 3.440423  | 3.355587  | H | 2.466914  | 2.969214  | -0.673708 |
| H | 1.912160  | 0.416613  | 5.827259  | H | 1.038701  | 3.980081  | -0.490554 |
| H | 2.733431  | 2.749243  | 5.537878  | C | 2.390102  | 4.632333  | -2.056555 |
| C | -4.618615 | -1.722944 | -0.433802 | H | 3.065504  | 4.173747  | -2.789325 |
| C | -4.126830 | -2.151203 | -1.677848 | H | 1.630124  | 5.172942  | -2.638505 |
| C | -5.801273 | -2.301678 | 0.051417  | C | 3.166660  | 5.630923  | -1.188660 |
| C | -4.816431 | -3.109055 | -2.422507 | H | 3.925753  | 5.089527  | -0.606291 |
| H | -3.198743 | -1.761230 | -2.087682 | H | 2.484991  | 6.080379  | -0.453543 |
| C | -6.489065 | -3.258408 | -0.695723 | C | 3.843718  | 6.738710  | -2.002273 |
| H | -6.192361 | -2.003761 | 1.017290  | H | 4.553855  | 6.321439  | -2.725143 |
| C | -6.002265 | -3.662690 | -1.938929 | H | 4.393655  | 7.432055  | -1.357064 |
| H | -4.417060 | -3.417389 | -3.384294 | H | 3.106474  | 7.322297  | -2.565234 |
| H | -7.406377 | -3.686825 | -0.301591 | C | 3.545480  | -0.813852 | -1.131739 |
| H | -6.539596 | -4.404510 | -2.523092 | C | 3.031564  | -1.814229 | -1.962954 |
| C | -4.645991 | -0.095895 | 1.533980  | C | 4.837214  | -0.326925 | -1.377597 |
| C | -4.326627 | -0.258936 | 2.885484  | C | 3.799235  | -2.325037 | -3.011788 |
| C | -5.764061 | 0.682344  | 1.195372  | H | 2.015413  | -2.165614 | -1.827631 |

C 5.606577 -0.841043 -2.419657  
 H 5.247157 0.459054 -0.747911  
 C 5.088716 -1.845560 -3.240408  
 H 3.377038 -3.088860 -3.657951  
 H 6.605558 -0.452239 -2.595152  
 H 5.682439 -2.241532 -4.059199  
 C -3.123733 1.785555 -0.137260  
 C -3.815837 2.591027 -1.048672  
 C -2.594742 2.374310 1.018417  
 C -3.993176 3.955031 -0.806019  
 H -4.213476 2.148432 -1.958887  
 C -2.769243 3.734832 1.263085  
 H -2.038832 1.767628 1.725980  
 C -3.471594 4.529622 0.352841  
 H -4.531577 4.565610 -1.525294  
 H -2.353553 4.177301 2.163976  
 H -3.605039 5.590591 0.544428  
 H -3.194392 0.164923 -1.493431  
 H 2.934090 0.847923 0.047962  
 Br -0.837201 -0.945498 -3.354210

**<sup>1</sup>[Ni<sup>II</sup>]H<sub>2</sub>**

B3LYP/BSI SCF energy: -2169.788588a.u.

M06/BSII SCF energy in solution: -2168.838011a.u.

M06/BSII free energy in solution: -2168.190296a.u.

C -1.256777 0.109592 -0.665313  
 N -1.388406 0.023037 0.608388  
 O -2.385992 0.307671 -1.386713  
 C -3.441119 0.674636 -0.413004  
 C -2.839473 0.069690 0.913455  
 C 1.256726 -0.109313 -0.665333

N 1.388418 -0.022673 0.608355  
 O 2.385856 -0.307656 -1.386777  
 C 3.441027 -0.674647 -0.413128  
 C 2.839480 -0.069725 0.913408  
 Ni 0.000017 -0.000034 1.992912  
 C -0.000009 0.000376 -1.503193  
 C 0.120761 1.265798 -2.397841  
 H -0.766439 1.358764 -3.026490  
 H 0.205874 2.169160 -1.787080  
 H 1.004281 1.185663 -3.034684  
 C -0.120729 -1.264429 -2.398694  
 H 0.766463 -1.356928 -3.027420  
 H -0.205775 -2.168221 -1.788557  
 H -1.004267 -1.183912 -3.035458  
 C 3.480371 -2.212292 -0.413343  
 C 4.210424 -2.876395 -1.412130  
 C 2.734707 -2.983865 0.491598  
 C 4.209139 -4.267343 -1.497042  
 H 4.788111 -2.297973 -2.125312  
 C 2.736070 -4.378536 0.406611  
 H 2.136618 -2.515976 1.266091  
 C 3.473701 -5.025481 -0.583786  
 H 4.786612 -4.758293 -2.275271  
 H 2.156540 -4.954662 1.122094  
 H 3.476733 -6.110080 -0.644120  
 C 4.759083 -0.066095 -0.859091  
 C 5.913560 -0.330077 -0.107298  
 C 4.861741 0.744123 -1.993647  
 C 7.140753 0.215038 -0.477031  
 H 5.852192 -0.970603 0.767747  
 C 6.094971 1.285038 -2.367519  
 H 3.977898 0.948066 -2.586236

C 7.236547 1.025600 -1.611115  
H 8.023710 0.004232 0.119338  
H 6.158394 1.910392 -3.253590  
H 8.194092 1.447878 -1.901647  
C -4.759210 0.066095 -0.858855  
C -5.913674 0.330385 -0.107151  
C -4.861898 -0.744465 -1.993162  
C -7.140902 -0.214749 -0.476740  
H -5.852265 0.971190 0.767687  
C -6.095166 -1.285390 -2.366896  
H -3.978055 -0.948655 -2.585666  
C -7.236735 -1.025634 -1.610591  
H -8.023857 -0.003697 0.119544  
H -6.158625 -1.911002 -3.252782  
H -8.194309 -1.447922 -1.901016  
C -3.480493 2.212280 -0.413244  
C -4.210023 2.876249 -1.412508  
C -2.735465 2.983973 0.492103  
C -4.208837 4.267185 -1.497504  
H -4.787226 2.297708 -2.125990  
C -2.736936 4.378645 0.407041  
H -2.137780 2.516197 1.266970  
C -3.474034 5.025453 -0.583836  
H -4.785891 4.758034 -2.276108  
H -2.157894 4.954876 1.122834  
H -3.477142 6.110048 -0.644233  
C 3.348771 1.293698 1.348727  
C 4.080753 1.402816 2.535752  
C 3.100651 2.452672 0.602261  
C 4.565338 2.638757 2.966024  
H 4.257780 0.515485 3.137488  
C 3.582236 3.689100 1.029199

H 2.524686 2.393375 -0.315945  
C 4.318174 3.786024 2.212392  
H 5.125551 2.704626 3.894265  
H 3.380734 4.578664 0.438931  
H 4.689603 4.750536 2.546674  
H 2.993051 -0.757528 1.742785  
H -2.993241 0.757304 1.742948  
C -3.348510 -1.293918 1.348511  
C -4.080972 -1.403296 2.535215  
C -3.099764 -2.452791 0.602095  
C -4.565406 -2.639387 2.965223  
H -4.258512 -0.516041 3.136913  
C -3.581196 -3.689371 1.028771  
H -2.523415 -2.393307 -0.315856  
C -4.317609 -3.786552 2.211644  
H -5.125998 -2.705449 3.893221  
H -3.379198 -4.578854 0.438551  
H -4.688909 -4.751184 2.545727  
H 0.928663 0.011015 3.118253  
H -0.928518 -0.011460 3.118365

**<sup>3</sup>[Ni<sup>II</sup>]H<sub>2</sub>**

B3LYP/BSI SCF energy: -2169.763357a.u.

M06/BSII SCF energy in solution: -2168.802976a.u.

M06/BSII free energy in solution: -2168.159336a.u.

C 1.258629 0.108101 -0.701238  
N 1.452289 0.345597 0.542946  
O 2.307413 -0.360729 -1.407841  
C 3.355561 -0.734295 -0.424212  
C 2.870943 0.067428 0.852441  
C -1.258849 0.289317 -0.673249

|    |           |           |           |   |           |           |           |
|----|-----------|-----------|-----------|---|-----------|-----------|-----------|
| N  | -1.373911 | 0.119818  | 0.590833  | C | -7.117168 | -1.306938 | -1.646763 |
| O  | -2.401530 | 0.443016  | -1.378140 | H | -7.996774 | -0.386099 | 0.095603  |
| C  | -3.479457 | 0.665952  | -0.379095 | H | -5.958977 | -2.069595 | -3.295994 |
| C  | -2.815720 | 0.044649  | 0.911157  | H | -8.035461 | -1.798793 | -1.954055 |
| Ni | 0.026204  | 0.500776  | 2.087940  | C | 4.709048  | -0.311639 | -0.969159 |
| C  | 0.001098  | 0.357933  | -1.517651 | C | 5.858905  | -0.580402 | -0.211684 |
| C  | -0.113433 | -0.693910 | -2.650810 | C | 4.847676  | 0.332679  | -2.202176 |
| H  | 0.754441  | -0.631038 | -3.308493 | C | 7.116802  | -0.199148 | -0.672339 |
| H  | -0.157236 | -1.708436 | -2.244712 | H | 5.768844  | -1.095264 | 0.740317  |
| H  | -1.016868 | -0.506981 | -3.233521 | C | 6.110989  | 0.710431  | -2.665625 |
| C  | 0.105501  | 1.783554  | -2.132867 | H | 3.967862  | 0.534768  | -2.801450 |
| H  | -0.777532 | 1.988333  | -2.741578 | C | 7.247930  | 0.449492  | -1.903080 |
| H  | 0.173501  | 2.543305  | -1.349902 | H | 7.995786  | -0.410668 | -0.070462 |
| H  | 0.994440  | 1.847295  | -2.766359 | H | 6.201525  | 1.208225  | -3.626993 |
| C  | -3.650754 | 2.191394  | -0.304670 | H | 8.229061  | 0.744657  | -2.263418 |
| C  | -4.395683 | 2.835820  | -1.306171 | C | 3.228940  | -2.256654 | -0.255627 |
| C  | -3.016646 | 2.977601  | 0.669406  | C | 3.937743  | -3.112574 | -1.112930 |
| C  | -4.516204 | 4.223510  | -1.328606 | C | 2.339091  | -2.821709 | 0.673404  |
| H  | -4.888586 | 2.243241  | -2.069932 | C | 3.778404  | -4.495469 | -1.035170 |
| C  | -3.142667 | 4.369654  | 0.646330  | H | 4.622038  | -2.694703 | -1.843246 |
| H  | -2.411815 | 2.531616  | 1.453750  | C | 2.183736  | -4.207668 | 0.749030  |
| C  | -3.891809 | 4.997175  | -0.347532 | H | 1.748424  | -2.202505 | 1.344581  |
| H  | -5.102074 | 4.699588  | -2.109842 | C | 2.902652  | -5.049045 | -0.099732 |
| H  | -2.648757 | 4.957954  | 1.414258  | H | 4.342056  | -5.139082 | -1.704710 |
| H  | -3.989982 | 6.079028  | -0.358940 | H | 1.495166  | -4.622845 | 1.479189  |
| C  | -4.741769 | -0.033411 | -0.852680 | H | 2.782069  | -6.126738 | -0.033855 |
| C  | -5.919018 | 0.121640  | -0.106056 | C | -3.216903 | -1.371175 | 1.290374  |
| C  | -4.770079 | -0.827878 | -2.002619 | C | -3.963905 | -1.578163 | 2.455214  |
| C  | -7.095322 | -0.513895 | -0.496634 | C | -2.854999 | -2.481066 | 0.516351  |
| H  | -5.915506 | 0.749134  | 0.780483  | C | -4.354331 | -2.863236 | 2.834828  |
| C  | -5.952811 | -1.458746 | -2.397644 | H | -4.230266 | -0.727777 | 3.077278  |
| H  | -3.868643 | -0.949620 | -2.591286 | C | -3.242374 | -3.765896 | 0.893044  |

H -2.261945 -2.346062 -0.382891  
C -3.995840 -3.961000 2.052804  
H -4.928606 -3.005053 3.745803  
H -2.952669 -4.616375 0.282295  
H -4.293885 -4.963056 2.347829  
H -3.002729 0.680591 1.775491  
H 2.902606 -0.586734 1.724251  
C 3.601215 1.349615 1.212065  
C 4.305990 1.420898 2.419105  
C 3.567596 2.479250 0.383380  
C 4.974585 2.589844 2.788150  
H 4.322930 0.558101 3.080124  
C 4.234383 3.647102 0.748551  
H 3.018211 2.447324 -0.552474  
C 4.941537 3.705578 1.952283  
H 5.512005 2.628648 3.731197  
H 4.200222 4.514051 0.094863  
H 5.457218 4.617870 2.237869  
H -0.869046 1.354573 3.077838  
H 0.450249 -0.846980 2.798771

## H<sub>2</sub>

B3LYP/BSI SCF energy: -1.178539a.u.

M06/BSII SCF energy in solution: -1.169882a.u.

M06/BSII free energy in solution: -1.171187a.u.

H 0.000000 0.000000 0.371265  
H 0.000000 0.000000 -0.371265

## <sup>1</sup>TS5

B3LYP/BSI SCF energy: -2405.633269a.u.

M06/BSII SCF energy in solution: -2404.544146a.u.

M06/BSII free energy in solution: -2403.740883a.u.

C -1.108744 -0.974610 0.871887  
N -1.456128 -0.043713 0.062713  
O -1.961776 -2.011054 1.005621  
C -3.095408 -1.817609 0.101267  
C -2.737709 -0.416818 -0.575213  
C 1.352335 -0.756759 0.883129  
N 1.556678 -1.284257 -0.253165  
O 2.321059 0.034465 1.421772  
C 3.456605 0.024678 0.498723  
C 2.837155 -0.770940 -0.753291  
Ni -0.599371 1.550456 -0.589125  
C 0.132775 -1.026230 1.753384  
C -0.024559 0.014471 2.885566  
H -0.892410 -0.244131 3.500316  
H -0.162670 1.016984 2.475604  
H 0.862292 0.010483 3.523148  
C 0.314170 -2.439905 2.360819  
H 1.228557 -2.458915 2.960561  
H 0.395980 -3.194164 1.576213  
H -0.527240 -2.693627 3.009820  
C 4.630695 -0.667840 1.205011  
C 5.906959 -0.667820 0.622876  
C 4.462237 -1.304791 2.439900  
C 6.977696 -1.300904 1.249879  
H 6.068437 -0.170331 -0.327005  
C 5.537080 -1.935896 3.071433  
H 3.490581 -1.292096 2.918077  
C 6.798272 -1.939694 2.478942  
H 7.955853 -1.291280 0.777568  
H 5.383478 -2.420635 4.031728



|   |           |           |           |   |           |           |           |
|---|-----------|-----------|-----------|---|-----------|-----------|-----------|
| H | 7.634434  | -2.429707 | 2.969443  | H | -7.759701 | -1.993497 | 0.586214  |
| C | 3.810972  | 1.479899  | 0.190285  | H | -7.647998 | -1.857382 | 3.070213  |
| C | 4.371188  | 1.858726  | -1.035898 | C | 0.189196  | 2.937993  | -1.786374 |
| C | 3.634768  | 2.459706  | 1.178101  | H | -0.522905 | 3.203233  | -2.563525 |
| C | 4.741014  | 3.184995  | -1.273483 | H | 1.152082  | 2.587717  | -2.144965 |
| H | 4.527384  | 1.121371  | -1.816398 | C | 0.066421  | 3.490391  | -0.501114 |
| C | 3.997382  | 3.784701  | 0.938578  | H | -0.557707 | 2.181384  | 0.770196  |
| H | 3.203127  | 2.179904  | 2.132292  | H | 0.967668  | 3.545825  | 0.104992  |
| C | 4.553012  | 4.153738  | -0.288682 | C | -0.979557 | 4.546333  | -0.186360 |
| H | 5.171791  | 3.457283  | -2.232810 | H | -1.207908 | 4.540381  | 0.885833  |
| H | 3.846852  | 4.530039  | 1.714568  | H | -1.916150 | 4.305312  | -0.703882 |
| H | 4.835768  | 5.185764  | -0.474380 | C | -0.514302 | 5.954965  | -0.600231 |
| C | -3.083644 | -2.982619 | -0.894309 | H | 0.437522  | 6.184563  | -0.099546 |
| C | -3.581329 | -2.845729 | -2.195976 | H | -0.300465 | 5.964031  | -1.677557 |
| C | -2.620490 | -4.239854 | -0.482115 | C | -1.536493 | 7.050913  | -0.272634 |
| C | -3.611586 | -3.936811 | -3.067329 | H | -1.750655 | 7.035904  | 0.804923  |
| H | -3.950397 | -1.886709 | -2.545561 | H | -2.486593 | 6.818859  | -0.773158 |
| C | -2.641662 | -5.326311 | -1.354954 | C | -1.072363 | 8.452640  | -0.681759 |
| H | -2.233066 | -4.361681 | 0.523001  | H | -0.142680 | 8.726906  | -0.169812 |
| C | -3.138876 | -5.180410 | -2.651419 | H | -1.822579 | 9.212247  | -0.437281 |
| H | -3.998684 | -3.807300 | -4.073871 | H | -0.882371 | 8.507712  | -1.759874 |
| H | -2.267767 | -6.289721 | -1.020199 | C | 3.675064  | -1.861895 | -1.393387 |
| H | -3.154393 | -6.027329 | -3.331102 | C | 3.844397  | -3.107795 | -0.774809 |
| C | -4.373645 | -1.840728 | 0.948309  | C | 4.265716  | -1.651077 | -2.644579 |
| C | -4.320428 | -1.768744 | 2.345222  | C | 4.604018  | -4.105793 | -1.381774 |
| C | -5.628648 | -1.928633 | 0.329684  | H | 3.372012  | -3.295053 | 0.183800  |
| C | -5.492746 | -1.775866 | 3.104576  | C | 5.031259  | -2.647214 | -3.255132 |
| H | -3.359888 | -1.717877 | 2.843693  | H | 4.108922  | -0.706215 | -3.159665 |
| C | -6.798098 | -1.928306 | 1.087119  | C | 5.205540  | -3.877519 | -2.622322 |
| H | -5.696856 | -2.003186 | -0.749954 | H | 4.725151  | -5.065697 | -0.887452 |
| C | -6.736298 | -1.852136 | 2.479920  | H | 5.478878  | -2.464019 | -4.227971 |
| H | -5.428082 | -1.724081 | 4.187885  | H | 5.796565  | -4.656919 | -3.094959 |

C -3.769905 0.691652 -0.490216  
C -4.505986 1.036380 -1.629548  
C -4.008698 1.387200 0.702451  
C -5.475401 2.040151 -1.578973  
H -4.308011 0.528545 -2.570340  
C -4.972761 2.392276 0.755356  
H -3.429893 1.147887 1.588134  
C -5.712813 2.719171 -0.383921  
H -6.035256 2.295737 -2.474149  
H -5.145123 2.923562 1.687036  
H -6.463707 3.502980 -0.340737  
H -2.509743 -0.581403 -1.629464  
H 2.598833 -0.033657 -1.527329  
H -0.599639 0.945387 -1.962469

**<sup>3</sup>TS5**

B3LYP/BSI SCF energy: -2405.597883a.u.

M06/BSII SCF energy in solution: -2404.502099a.u.

M06/BSII free energy in solution: -2403.70517a.u.

C -0.998236 -0.488679 0.831854  
N -1.510599 0.133303 -0.167066  
O -1.567621 -1.659507 1.180474  
C -2.522846 -2.030101 0.128427  
C -2.662870 -0.655939 -0.655026  
C 1.417933 0.006478 0.859985  
N 1.646949 -0.754632 -0.129788  
O 2.390470 0.866043 1.267160  
C 3.522449 0.714474 0.350323  
C 2.979601 -0.426370 -0.647021  
Ni -0.597876 1.390661 -1.638210  
C 0.158137 -0.022796 1.712798

C -0.168282 1.374640 2.284369  
H -1.080858 1.324405 2.886419  
H -0.310013 2.098447 1.481693  
H 0.649900 1.713057 2.923788  
C 0.402430 -1.015032 2.876418  
H 1.245195 -0.663637 3.477582  
H 0.627305 -2.015510 2.503318  
H -0.476611 -1.074061 3.523593  
C 4.753134 0.335582 1.182385  
C 6.029315 0.339861 0.600789  
C 4.636996 -0.022058 2.530635  
C 7.153134 -0.017680 1.342478  
H 6.150743 0.629361 -0.437240  
C 5.764582 -0.374118 3.276318  
H 3.662551 -0.010952 3.003322  
C 7.026980 -0.376707 2.686074  
H 8.130904 -0.009983 0.869264  
H 5.650712 -0.643501 4.322842  
H 7.904094 -0.650406 3.265374  
C 3.738374 2.065171 -0.339390  
C 4.257901 2.159336 -1.636329  
C 3.472476 3.249980 0.361705  
C 4.498380 3.404306 -2.222760  
H 4.480049 1.262386 -2.205493  
C 3.704555 4.492615 -0.225608  
H 3.073204 3.193127 1.367879  
C 4.219630 4.576130 -1.521204  
H 4.898191 3.452457 -3.231598  
H 3.484101 5.398502 0.332255  
H 4.401027 5.544680 -1.978048  
C -1.868161 -3.145197 -0.700505  
C -2.078812 -3.283406 -2.076816

|   |           |           |           |   |           |           |           |
|---|-----------|-----------|-----------|---|-----------|-----------|-----------|
| C | -1.087954 | -4.107195 | -0.042338 | C | -3.392607 | 5.723412  | 1.103149  |
| C | -1.515381 | -4.350504 | -2.781129 | H | -2.593110 | 5.928864  | 1.828428  |
| H | -2.676135 | -2.561363 | -2.623326 | H | -3.998574 | 4.917107  | 1.538815  |
| C | -0.519367 | -5.166295 | -0.745568 | C | -4.257774 | 6.975738  | 0.929525  |
| H | -0.921205 | -4.017248 | 1.025393  | H | -3.671186 | 7.809929  | 0.527830  |
| C | -0.731154 | -5.293305 | -2.120152 | H | -4.688560 | 7.301319  | 1.882339  |
| H | -1.685527 | -4.432744 | -3.850627 | H | -5.085713 | 6.791588  | 0.235349  |
| H | 0.091473  | -5.893684 | -0.218593 | C | 3.837690  | -1.664672 | -0.831810 |
| H | -0.285840 | -6.117521 | -2.669576 | C | 3.900396  | -2.663171 | 0.148506  |
| C | -3.793218 | -2.544794 | 0.805688  | C | 4.568477  | -1.838622 | -2.012318 |
| C | -3.998977 | -2.402100 | 2.182509  | C | 4.688149  | -3.797072 | -0.040790 |
| C | -4.784765 | -3.172986 | 0.039225  | H | 3.321512  | -2.552721 | 1.059578  |
| C | -5.171076 | -2.872913 | 2.778497  | C | 5.361300  | -2.971823 | -2.205506 |
| H | -3.236938 | -1.930972 | 2.791649  | H | 4.504890  | -1.089811 | -2.798395 |
| C | -5.958019 | -3.633904 | 0.633048  | C | 5.425216  | -3.953921 | -1.217399 |
| H | -4.635182 | -3.315206 | -1.026053 | H | 4.725360  | -4.562032 | 0.729918  |
| C | -6.156533 | -3.487147 | 2.007402  | H | 5.918606  | -3.089739 | -3.130618 |
| H | -5.309170 | -2.758578 | 3.850081  | H | 6.037956  | -4.838821 | -1.364642 |
| H | -6.714765 | -4.115792 | 0.020660  | C | -3.970231 | 0.098249  | -0.483176 |
| H | -7.067966 | -3.852803 | 2.471367  | C | -4.896772 | 0.118459  | -1.532167 |
| C | -2.059918 | 2.817770  | -2.293886 | C | -4.282444 | 0.779096  | 0.700831  |
| H | -3.033768 | 2.423796  | -2.021373 | C | -6.111499 | 0.794639  | -1.402278 |
| H | -1.862973 | 2.934495  | -3.353784 | H | -4.661397 | -0.390312 | -2.463625 |
| C | -1.291494 | 3.516502  | -1.341545 | C | -5.493954 | 1.457273  | 0.833947  |
| H | -0.074724 | 2.585290  | -0.686586 | H | -3.571852 | 0.785545  | 1.521449  |
| H | -0.529754 | 4.190128  | -1.733228 | C | -6.413555 | 1.466092  | -0.217339 |
| C | -1.902356 | 3.973401  | -0.028168 | H | -6.815751 | 0.802293  | -2.229280 |
| H | -1.111973 | 4.185507  | 0.702415  | H | -5.720485 | 1.979251  | 1.759476  |
| H | -2.515953 | 3.165038  | 0.385521  | H | -7.355966 | 1.996179  | -0.114149 |
| C | -2.772954 | 5.229921  | -0.210643 | H | -2.500208 | -0.817696 | -1.719933 |
| H | -2.166499 | 6.034375  | -0.651217 | H | 2.832453  | 0.025531  | -1.631744 |
| H | -3.568827 | 5.014866  | -0.934641 | H | -0.595612 | 0.332371  | -2.783131 |

**<sup>3</sup>TS5**

B3LYP/BSI SCF energy: -2405.597883a.u.

M06/BSII SCF energy in solution: -2404.502099a.u.

M06/BSII free energy in solution: -2403.70517a.u.

C -0.998236 -0.488679 0.831854  
N -1.510599 0.133303 -0.167066  
O -1.567621 -1.659507 1.180474  
C -2.522846 -2.030101 0.128427  
C -2.662870 -0.655939 -0.655026  
C 1.417933 0.006478 0.859985  
N 1.646949 -0.754632 -0.129788  
O 2.390470 0.866043 1.267160  
C 3.522449 0.714474 0.350323  
C 2.979601 -0.426370 -0.647021  
Ni -0.597876 1.390661 -1.638210  
C 0.158137 -0.022796 1.712798  
C -0.168282 1.374640 2.284369  
H -1.080858 1.324405 2.886419  
H -0.310013 2.098447 1.481693  
H 0.649900 1.713057 2.923788  
C 0.402430 -1.015032 2.876418  
H 1.245195 -0.663637 3.477582  
H 0.627305 -2.015510 2.503318  
H -0.476611 -1.074061 3.523593  
C 4.753134 0.335582 1.182385  
C 6.029315 0.339861 0.600789  
C 4.636996 -0.022058 2.530635  
C 7.153134 -0.017680 1.342478  
H 6.150743 0.629361 -0.437240  
C 5.764582 -0.374118 3.276318

H 3.662551 -0.010952 3.003322  
C 7.026980 -0.376707 2.686074  
H 8.130904 -0.009983 0.869264  
H 5.650712 -0.643501 4.322842  
H 7.904094 -0.650406 3.265374  
C 3.738374 2.065171 -0.339390  
C 4.257901 2.159336 -1.636329  
C 3.472476 3.249980 0.361705  
C 4.498380 3.404306 -2.222760  
H 4.480049 1.262386 -2.205493  
C 3.704555 4.492615 -0.225608  
H 3.073204 3.193127 1.367879  
C 4.219630 4.576130 -1.521204  
H 4.898191 3.452457 -3.231598  
H 3.484101 5.398502 0.332255  
H 4.401027 5.544680 -1.978048  
C -1.868161 -3.145197 -0.700505  
C -2.078812 -3.283406 -2.076816  
C -1.087954 -4.107195 -0.042338  
C -1.515381 -4.350504 -2.781129  
H -2.676135 -2.561363 -2.623326  
C -0.519367 -5.166295 -0.745568  
H -0.921205 -4.017248 1.025393  
C -0.731154 -5.293305 -2.120152  
H -1.685527 -4.432744 -3.850627  
H 0.091473 -5.893684 -0.218593  
H -0.285840 -6.117521 -2.669576  
C -3.793218 -2.544794 0.805688  
C -3.998977 -2.402100 2.182509  
C -4.784765 -3.172986 0.039225  
C -5.171076 -2.872913 2.778497  
H -3.236938 -1.930972 2.791649

C -5.958019 -3.633904 0.633048  
H -4.635182 -3.315206 -1.026053  
C -6.156533 -3.487147 2.007402  
H -5.309170 -2.758578 3.850081  
H -6.714765 -4.115792 0.020660  
H -7.067966 -3.852803 2.471367  
C -2.059918 2.817770 -2.293886  
H -3.033768 2.423796 -2.021373  
H -1.862973 2.934495 -3.353784  
C -1.291494 3.516502 -1.341545  
H -0.074724 2.585290 -0.686586  
H -0.529754 4.190128 -1.733228  
C -1.902356 3.973401 -0.028168  
H -1.111973 4.185507 0.702415  
H -2.515953 3.165038 0.385521  
C -2.772954 5.229921 -0.210643  
H -2.166499 6.034375 -0.651217  
H -3.568827 5.014866 -0.934641  
C -3.392607 5.723412 1.103149  
H -2.593110 5.928864 1.828428  
H -3.998574 4.917107 1.538815  
C -4.257774 6.975738 0.929525  
H -3.671186 7.809929 0.527830  
H -4.688560 7.301319 1.882339  
H -5.085713 6.791588 0.235349  
C 3.837690 -1.664672 -0.831810  
C 3.900396 -2.663171 0.148506  
C 4.568477 -1.838622 -2.012318  
C 4.688149 -3.797072 -0.040790  
H 3.321512 -2.552721 1.059578  
C 5.361300 -2.971823 -2.205506  
H 4.504890 -1.089811 -2.798395

C 5.425216 -3.953921 -1.217399  
H 4.725360 -4.562032 0.729918  
H 5.918606 -3.089739 -3.130618  
H 6.037956 -4.838821 -1.364642  
C -3.970231 0.098249 -0.483176  
C -4.896772 0.118459 -1.532167  
C -4.282444 0.779096 0.700831  
C -6.111499 0.794639 -1.402278  
H -4.661397 -0.390312 -2.463625  
C -5.493954 1.457273 0.833947  
H -3.571852 0.785545 1.521449  
C -6.413555 1.466092 -0.217339  
H -6.815751 0.802293 -2.229280  
H -5.720485 1.979251 1.759476  
H -7.355966 1.996179 -0.114149  
H -2.500208 -0.817696 -1.719933  
H 2.832453 0.025531 -1.631744  
H -0.595612 0.332371 -2.783131

#### <sup>4</sup>IM1

B3LYP/BSI SCF energy: -2405.677161a.u.

M06/BSII SCF energy in solution: -2404.584368a.u.

M06/BSII free energy in solution: -2403.77716a.u.

C 0.593446 -1.560887 -0.479594  
N 1.090619 -0.390390 -0.650738  
O 1.379874 -2.480352 0.129089  
C 2.489625 -1.724568 0.737797  
C 2.498123 -0.445503 -0.191011  
C -1.807953 -0.969643 -0.618801  
N -1.598462 0.291834 -0.525286  
O -3.082748 -1.398509 -0.495782

|    |           |           |           |   |           |           |           |
|----|-----------|-----------|-----------|---|-----------|-----------|-----------|
| C  | -3.932467 | -0.182113 | -0.563642 | H | -6.653660 | -1.572104 | -4.108344 |
| C  | -2.882779 | 0.929813  | -0.166242 | H | -5.492993 | -0.126529 | -5.772178 |
| Ni | 0.030410  | 1.303146  | -1.023219 | C | 2.061419  | -1.419654 | 2.183797  |
| C  | -0.777769 | -2.039204 | -0.929270 | C | 2.367022  | -0.219078 | 2.835101  |
| C  | -0.757699 | -2.240497 | -2.473035 | C | 1.380578  | -2.415563 | 2.902434  |
| H  | -0.046446 | -3.029705 | -2.735526 | C | 1.990143  | -0.012079 | 4.165462  |
| H  | -0.471446 | -1.315319 | -2.978212 | H | 2.898287  | 0.574348  | 2.320885  |
| H  | -1.751055 | -2.540209 | -2.817467 | C | 1.000154  | -2.207852 | 4.226476  |
| C  | -1.159295 | -3.363987 | -0.234916 | H | 1.150263  | -3.356813 | 2.415229  |
| H  | -2.144534 | -3.685566 | -0.575504 | C | 1.303337  | -1.002309 | 4.864833  |
| H  | -1.186154 | -3.255121 | 0.852308  | H | 2.232013  | 0.930696  | 4.646935  |
| H  | -0.428982 | -4.137125 | -0.480430 | H | 0.471993  | -2.991280 | 4.762714  |
| C  | -5.094089 | -0.338968 | 0.401493  | H | 1.010760  | -0.840393 | 5.898230  |
| C  | -6.150578 | 0.582148  | 0.350834  | C | 3.739676  | -2.594682 | 0.700660  |
| C  | -5.128754 | -1.355604 | 1.361123  | C | 3.844661  | -3.676825 | -0.181797 |
| C  | -7.214459 | 0.491812  | 1.246087  | C | 4.821339  | -2.303972 | 1.543018  |
| H  | -6.144090 | 1.367003  | -0.399760 | C | 5.005987  | -4.449387 | -0.220376 |
| C  | -6.199880 | -1.449749 | 2.252740  | H | 3.013578  | -3.918190 | -0.833234 |
| H  | -4.320255 | -2.075547 | 1.405107  | C | 5.985407  | -3.070219 | 1.495613  |
| C  | -7.243843 | -0.527045 | 2.201091  | H | 4.751842  | -1.483187 | 2.249545  |
| H  | -8.023147 | 1.215075  | 1.193982  | C | 6.082021  | -4.148106 | 0.614507  |
| H  | -6.214699 | -2.248735 | 2.988652  | H | 5.067199  | -5.288897 | -0.907087 |
| H  | -8.075408 | -0.601217 | 2.895834  | H | 6.813337  | -2.828117 | 2.155723  |
| C  | -4.385202 | -0.092787 | -2.028925 | H | 6.985564  | -4.749973 | 0.582517  |
| C  | -3.726871 | 0.704174  | -2.977776 | C | 1.485936  | 2.432998  | -1.586702 |
| C  | -5.437342 | -0.916575 | -2.462411 | H | 1.180879  | 3.029683  | -2.456808 |
| C  | -4.127925 | 0.690662  | -4.316791 | H | 2.311916  | 1.791135  | -1.927872 |
| H  | -2.889337 | 1.334736  | -2.697807 | C | 2.001662  | 3.385403  | -0.496228 |
| C  | -5.833441 | -0.930994 | -3.797899 | H | 1.188599  | 4.048555  | -0.171938 |
| H  | -5.951432 | -1.547308 | -1.744525 | H | 2.292831  | 2.822223  | 0.406914  |
| C  | -5.181663 | -0.121765 | -4.731464 | C | 3.204723  | 4.242296  | -0.931381 |
| H  | -3.607783 | 1.320481  | -5.032666 | H | 2.922229  | 4.823858  | -1.820939 |

H 4.022531 3.580184 -1.252893  
C 3.721250 5.196603 0.153858  
H 2.903055 5.857775 0.474810  
H 4.004410 4.616266 1.045317  
C 4.916045 6.051899 -0.287177  
H 4.633519 6.635608 -1.174023  
H 5.734094 5.392538 -0.609259  
C 5.424420 6.999027 0.805119  
H 4.637638 7.692423 1.124363  
H 6.274011 7.597653 0.458578  
H 5.750147 6.442716 1.692111  
C -2.880231 1.393771 1.281688  
C -2.278116 0.649662 2.303354  
C -3.491928 2.610095 1.608025  
C -2.296344 1.106377 3.621201  
H -1.770924 -0.281076 2.071250  
C -3.516496 3.067605 2.925529  
H -3.942779 3.210063 0.821813  
C -2.918884 2.315174 3.937511  
H -1.811356 0.520563 4.396782  
H -3.991778 4.016316 3.158043  
H -2.929141 2.673171 4.963120  
C 3.488750 -0.486218 -1.345102  
C 4.748476 0.102759 -1.175707  
C 3.198822 -1.112434 -2.562123  
C 5.700266 0.060445 -2.193411  
H 4.983913 0.606798 -0.241950  
C 4.148066 -1.152587 -3.584476  
H 2.219850 -1.549579 -2.725201  
C 5.402458 -0.569309 -3.403158  
H 6.669612 0.527306 -2.044518  
H 3.902984 -1.634903 -4.526611

H 6.139099 -0.597051 -4.200844  
H 2.701005 0.451017 0.391229  
H -3.019114 1.810986 -0.789967  
H -0.753044 2.522101 -1.210207

### <sup>3</sup>IM1

B3LYP/BSI SCF energy: -2405.658046a.u.

M06/BSII SCF energy in solution: -2404.553367a.u.

M06/BSII free energy in solution: -2403.751156a.u.

C 1.151177 -1.324762 0.703209  
N 1.326574 -0.273525 -0.007767  
O 2.261211 -1.947848 1.162055  
C 3.392474 -1.019519 0.929492  
C 2.783176 -0.090169 -0.194850  
C -1.371217 -1.336575 0.541360  
N -1.503828 -0.128715 0.138156  
O -2.465888 -2.126355 0.497360  
C -3.489671 -1.398680 -0.292047  
C -2.915299 0.078588 -0.245304  
Ni -0.037491 1.240323 -0.543009  
C -0.140165 -1.995930 1.137203  
C -0.084101 -3.486982 0.714050  
H 0.792355 -3.962060 1.157572  
H -0.029037 -3.586720 -0.373695  
H -0.981609 -4.003920 1.055580  
C -0.248098 -1.896133 2.686883  
H -1.159304 -2.397179 3.024341  
H -0.278211 -0.852068 3.009748  
H 0.614242 -2.379362 3.150548  
C -4.841194 -1.577760 0.378159  
C -5.975154 -1.003366 -0.215709

|   |           |           |           |   |           |           |           |
|---|-----------|-----------|-----------|---|-----------|-----------|-----------|
| C | -4.993801 | -2.296520 | 1.567503  | C | 4.553852  | -3.197420 | 0.267279  |
| C | -7.229493 | -1.134706 | 0.375324  | C | 5.835145  | -1.155207 | 0.343612  |
| H | -5.876061 | -0.456254 | -1.148533 | C | 5.697815  | -3.894784 | -0.129973 |
| C | -6.253726 | -2.432175 | 2.157087  | H | 3.616144  | -3.724533 | 0.396855  |
| H | -4.127576 | -2.755033 | 2.029411  | C | 6.973033  | -1.850146 | -0.059523 |
| C | -7.374109 | -1.850683 | 1.566437  | H | 5.898796  | -0.089126 | 0.541425  |
| H | -8.095403 | -0.679292 | -0.096345 | C | 6.908809  | -3.225325 | -0.297506 |
| H | -6.354609 | -2.996664 | 3.079809  | H | 5.637200  | -4.964800 | -0.307593 |
| H | -8.352652 | -1.955400 | 2.025883  | H | 7.911371  | -1.317599 | -0.184239 |
| C | -3.430837 | -2.015461 | -1.698406 | H | 7.796731  | -3.768362 | -0.607797 |
| C | -2.517071 | -1.555787 | -2.661758 | C | 1.024277  | 2.942971  | -0.414007 |
| C | -4.229480 | -3.127408 | -2.007288 | H | 1.899226  | 2.834064  | -1.074877 |
| C | -2.426933 | -2.185127 | -3.905315 | H | 1.426068  | 3.103010  | 0.604380  |
| H | -1.857556 | -0.712820 | -2.464843 | C | 0.245264  | 4.200510  | -0.831132 |
| C | -4.135328 | -3.753179 | -3.249795 | H | -0.179829 | 4.049939  | -1.833974 |
| H | -4.933050 | -3.504561 | -1.273105 | H | -0.615841 | 4.350459  | -0.161047 |
| C | -3.235271 | -3.281093 | -4.206458 | C | 1.074322  | 5.498267  | -0.843191 |
| H | -1.719046 | -1.807906 | -4.637775 | H | 1.923284  | 5.371088  | -1.531171 |
| H | -4.768437 | -4.608393 | -3.468991 | H | 1.513707  | 5.654513  | 0.153634  |
| H | -3.164887 | -3.763971 | -5.177143 | C | 0.277800  | 6.746635  | -1.245428 |
| C | 3.606228  | -0.304950 | 2.273949  | H | -0.169483 | 6.587469  | -2.237661 |
| C | 3.039496  | 0.944041  | 2.567279  | H | -0.566596 | 6.876816  | -0.552342 |
| C | 4.313350  | -0.971401 | 3.288438  | C | 1.110216  | 8.035244  | -1.270197 |
| C | 3.192826  | 1.515134  | 3.833746  | H | 1.948744  | 7.909766  | -1.969043 |
| H | 2.467447  | 1.489834  | 1.825461  | H | 1.562979  | 8.192247  | -0.281236 |
| C | 4.462006  | -0.402970 | 4.551655  | C | 0.300504  | 9.275841  | -1.662387 |
| H | 4.754066  | -1.941309 | 3.083116  | H | -0.137219 | 9.162965  | -2.661147 |
| C | 3.904377  | 0.847282  | 4.828605  | H | 0.921522  | 10.178364 | -1.671998 |
| H | 2.752014  | 2.487303  | 4.034394  | H | -0.524263 | 9.447317  | -0.960749 |
| H | 5.017661  | -0.935568 | 5.318248  | C | -3.584977 | 1.076287  | 0.684248  |
| H | 4.025210  | 1.295587  | 5.810626  | C | -3.501972 | 0.963429  | 2.078702  |
| C | 4.611421  | -1.821155 | 0.505895  | C | -4.287031 | 2.156831  | 0.137451  |



C -4.117831 1.902120 2.904676  
H -2.951602 0.139896 2.523154  
C -4.905279 3.098584 0.962135  
H -4.341756 2.267017 -0.942610  
C -4.823484 2.972082 2.348600  
H -4.045330 1.800309 3.983806  
H -5.441292 3.933371 0.519948  
H -5.299787 3.705149 2.993234  
C 3.190461 -0.377191 -1.630716  
C 4.024808 0.526897 -2.297199  
C 2.751148 -1.517994 -2.313497  
C 4.422406 0.294584 -3.614668  
H 4.355555 1.427183 -1.786072  
C 3.145856 -1.752894 -3.629428  
H 2.088783 -2.223248 -1.821501  
C 3.984629 -0.848000 -4.283934  
H 5.064510 1.011272 -4.118451  
H 2.794150 -2.641219 -4.146428  
H 4.287291 -1.029371 -5.311260  
H 3.029638 0.950630 0.011320  
H -2.929087 0.502947 -1.250086  
H -0.463362 1.045226 -2.064133

**<sup>1</sup>TS6**

B3LYP/BSI SCF energy: -2405.649612a.u.

M06/BSII SCF energy in solution: -2404.559907a.u.

M06/BSII free energy in solution: -2403.755555a.u.

C 0.555717 -1.398481 -0.829035  
N 1.076618 -0.238472 -0.671743  
O 1.303293 -2.474930 -0.457601  
C 2.432664 -1.955104 0.318233

C 2.441031 -0.430315 -0.147560  
C -1.832116 -0.721325 -0.871771  
N -1.636576 0.504043 -0.539355  
O -3.105196 -1.194302 -0.773767  
C -3.972283 -0.034651 -0.541973  
C -2.915340 1.030530 -0.015954  
Ni -0.017548 1.526550 -0.761279  
C -0.808279 -1.695506 -1.433776  
C -0.730327 -1.467207 -2.972358  
H -0.019622 -2.169870 -3.419611  
H -0.412943 -0.444094 -3.187188  
H -1.713012 -1.634168 -3.422950  
C -1.232074 -3.150761 -1.143953  
H -2.204578 -3.350667 -1.595851  
H -1.305943 -3.341879 -0.070409  
H -0.498419 -3.842088 -1.562614  
C -5.057564 -0.448845 0.448188  
C -6.253916 0.275789 0.537085  
C -4.870001 -1.541799 1.304322  
C -7.233131 -0.077053 1.465457  
H -6.430875 1.112833 -0.130045  
C -5.854357 -1.899773 2.225791  
H -3.955227 -2.118351 1.239558  
C -7.038904 -1.168030 2.313308  
H -8.153001 0.498463 1.518098  
H -5.692266 -2.754670 2.876357  
H -7.804545 -1.447392 3.031339  
C -4.572506 0.348617 -1.904967  
C -4.873765 1.669681 -2.258018  
C -4.894080 -0.672662 -2.812462  
C -5.466674 1.964601 -3.488889  
H -4.652625 2.488351 -1.581164

|   |           |           |           |   |           |           |           |
|---|-----------|-----------|-----------|---|-----------|-----------|-----------|
| C | -5.480061 | -0.379258 | -4.042272 | H | 1.399954  | 4.100890  | 0.863578  |
| H | -4.679293 | -1.702055 | -2.547544 | H | 2.324108  | 2.624380  | 0.705702  |
| C | -5.768455 | 0.943073  | -4.387282 | C | 3.283289  | 4.350175  | -0.170601 |
| H | -5.685346 | 2.997939  | -3.742100 | H | 2.985851  | 5.258795  | -0.714413 |
| H | -5.715456 | -1.185992 | -4.730840 | H | 3.915181  | 3.774314  | -0.861304 |
| H | -6.224430 | 1.173149  | -5.345786 | C | 4.108899  | 4.745386  | 1.060711  |
| C | 2.060641  | -2.110457 | 1.802323  | H | 3.476051  | 5.314289  | 1.757400  |
| C | 2.521792  | -1.232818 | 2.791948  | H | 4.410662  | 3.836504  | 1.602709  |
| C | 1.275875  | -3.205074 | 2.196606  | C | 5.359284  | 5.569329  | 0.727774  |
| C | 2.196130  | -1.433376 | 4.136095  | H | 5.058841  | 6.480201  | 0.191996  |
| H | 3.142671  | -0.381643 | 2.531417  | H | 5.989596  | 5.002627  | 0.028685  |
| C | 0.945335  | -3.402641 | 3.536221  | C | 6.181752  | 5.952022  | 1.962674  |
| H | 0.923187  | -3.900713 | 1.443600  | H | 5.586877  | 6.546851  | 2.665517  |
| C | 1.402802  | -2.515676 | 4.513341  | H | 7.064463  | 6.541757  | 1.692894  |
| H | 2.562190  | -0.736230 | 4.884180  | H | 6.528919  | 5.061189  | 2.499341  |
| H | 0.331765  | -4.253957 | 3.817371  | C | -2.861146 | 1.249799  | 1.486777  |
| H | 1.146552  | -2.669701 | 5.557495  | C | -2.102490 | 0.430553  | 2.331552  |
| C | 3.669756  | -2.772431 | -0.043278 | C | -3.595264 | 2.299552  | 2.051679  |
| C | 3.742010  | -3.460996 | -1.261386 | C | -2.086061 | 0.651312  | 3.709035  |
| C | 4.770320  | -2.825444 | 0.822638  | H | -1.502433 | -0.369323 | 1.911139  |
| C | 4.885385  | -4.183420 | -1.603391 | C | -3.583344 | 2.521625  | 3.428859  |
| H | 2.895744  | -3.439683 | -1.937402 | H | -4.177233 | 2.954333  | 1.407560  |
| C | 5.916579  | -3.540519 | 0.475817  | C | -2.828275 | 1.695801  | 4.263003  |
| H | 4.731497  | -2.317947 | 1.780558  | H | -1.483000 | 0.010077  | 4.345817  |
| C | 5.979199  | -4.224702 | -0.738465 | H | -4.156951 | 3.343679  | 3.847745  |
| H | 4.918288  | -4.715719 | -2.549887 | H | -2.812136 | 1.870246  | 5.335167  |
| H | 6.757886  | -3.568378 | 1.162477  | C | 3.501929  | -0.033143 | -1.160753 |
| H | 6.868987  | -4.787353 | -1.005690 | C | 4.722337  | 0.484950  | -0.709290 |
| C | 1.196695  | 3.156844  | -1.073796 | C | 3.300429  | -0.171713 | -2.539035 |
| H | 0.983590  | 4.073767  | -1.641684 | C | 5.724902  | 0.844207  | -1.610264 |
| H | 1.767351  | 2.523654  | -1.768374 | H | 4.890064  | 0.611763  | 0.357504  |
| C | 2.026510  | 3.531396  | 0.163092  | C | 4.299607  | 0.190910  | -3.443397 |

H 2.350309 -0.543887 -2.906732  
C 5.515871 0.696996 -2.982621  
H 6.664441 1.244995 -1.240642  
H 4.124156 0.082787 -4.510100  
H 6.291997 0.981723 -3.687154  
H 2.557968 0.212479 0.724779  
H -3.091182 1.993983 -0.489435  
H -0.090301 3.011360 -0.802505

### <sup>3</sup>TS6

B3LYP/BSI SCF energy: -2405.624042a.u.

M06/BSII SCF energy in solution: -2404.519758a.u.

M06/BSII free energy in solution: -2403.718582a.u.

C 1.158441 -1.562096 -0.625883  
N 1.433089 -0.299574 -0.794652  
O 2.070757 -2.278405 0.091083  
C 2.965810 -1.312520 0.726821  
C 2.759200 -0.044731 -0.212927  
C -1.250539 -1.459555 -0.776938  
N -1.380571 -0.157413 -0.923310  
O -2.354833 -2.105149 -0.279898  
C -3.471375 -1.179992 -0.407592  
C -2.714376 0.215589 -0.419462  
Ni 0.062084 1.089812 -1.343613  
C -0.054523 -2.285334 -1.177058  
C 0.040696 -2.353221 -2.733141  
H 0.923993 -2.928712 -3.031539  
H 0.112768 -1.348273 -3.157705  
H -0.851110 -2.841255 -3.137993  
C -0.151742 -3.713926 -0.609362  
H -1.030444 -4.214668 -1.019836

H -0.236971 -3.710755 0.479606  
H 0.737518 -4.285756 -0.882900  
C -4.420977 -1.412984 0.765878  
C -5.728641 -0.909733 0.735398  
C -3.998547 -2.115112 1.901374  
C -6.589398 -1.096387 1.816477  
H -6.086608 -0.381686 -0.142171  
C -4.864180 -2.310401 2.978618  
H -2.992770 -2.515399 1.933561  
C -6.161724 -1.800245 2.943170  
H -7.599077 -0.697892 1.772241  
H -4.519721 -2.863946 3.847769  
H -6.834511 -1.952434 3.782286  
C -4.163654 -1.477716 -1.751364  
C -4.825374 -0.496432 -2.500552  
C -4.187890 -2.799515 -2.221324  
C -5.481143 -0.822329 -3.690879  
H -4.842877 0.536461 -2.167432  
C -4.836780 -3.125350 -3.411147  
H -3.691252 -3.572331 -1.645524  
C -5.486010 -2.136820 -4.153662  
H -5.983142 -0.041834 -4.255501  
H -4.837557 -4.155302 -3.757016  
H -5.991050 -2.389628 -5.081367  
C 2.438309 -1.071973 2.151129  
C 2.637117 0.134582 2.835415  
C 1.783723 -2.116465 2.821776  
C 2.189399 0.296556 4.149206  
H 3.149019 0.963095 2.356129  
C 1.329865 -1.953846 4.129971  
H 1.632611 -3.059389 2.308786  
C 1.530926 -0.745612 4.801165

H 2.356719 1.241329 4.658440  
H 0.822194 -2.775400 4.627474  
H 1.182362 -0.620301 5.822232  
C 4.369311 -1.916222 0.739539  
C 4.722660 -2.914277 -0.178410  
C 5.337309 -1.469370 1.648812  
C 6.010778 -3.449610 -0.186165  
H 3.982490 -3.278286 -0.880317  
C 6.627933 -1.998859 1.634259  
H 5.083459 -0.714083 2.384681  
C 6.970504 -2.992998 0.717631  
H 6.262377 -4.226925 -0.902231  
H 7.362429 -1.638080 2.348781  
H 7.973231 -3.410537 0.710748  
C 0.947775 2.861682 -0.893988  
H 2.001205 2.977021 -1.163664  
H 0.898778 2.598052 0.175399  
C 0.157790 4.141052 -1.168107  
H 0.196707 4.376698 -2.240484  
H -0.903926 3.983514 -0.930612  
C 0.667279 5.350914 -0.367250  
H 1.731507 5.509559 -0.594036  
H 0.614920 5.121987 0.706773  
C -0.109910 6.643772 -0.648296  
H -0.056068 6.873735 -1.722227  
H -1.174815 6.482239 -0.426322  
C 0.394587 7.851141 0.152315  
H 1.459045 8.011196 -0.067842  
H 0.338892 7.621741 1.225360  
C -0.384815 9.138424 -0.135728  
H -0.319862 9.411752 -1.195241  
H -0.000171 9.980948 0.448787

H -1.446967 9.021701 0.108909  
C -2.643599 0.955251 0.907015  
C -1.730401 0.594028 1.907801  
C -3.507976 2.031623 1.143354  
C -1.694043 1.285829 3.117960  
H -1.037752 -0.223858 1.736778  
C -3.472789 2.727221 2.353872  
H -4.214946 2.330582 0.372676  
C -2.566548 2.353971 3.346053  
H -0.977446 0.991018 3.878949  
H -4.148974 3.561893 2.516760  
H -2.534484 2.894574 4.287879  
C 3.827248 0.193532 -1.270095  
C 4.914050 1.024745 -0.969238  
C 3.760907 -0.390812 -2.540388  
C 5.920311 1.256255 -1.907029  
H 4.973401 1.497706 0.008288  
C 4.765521 -0.160588 -3.481123  
H 2.908867 -1.009103 -2.801157  
C 5.849570 0.661195 -3.167553  
H 6.753808 1.906112 -1.655543  
H 4.696138 -0.618116 -4.464132  
H 6.628479 0.843546 -3.902442  
H 2.707010 0.852211 0.405418  
H -3.192744 0.877486 -1.141819  
H 0.701573 2.026425 -2.302348

<sup>1</sup>[Ni<sup>0</sup>]

B3LYP/BSI SCF energy: -2168.542621a.u.

M06/BSII SCF energy in solution: -2167.596388a.u.

M06/BSII free energy in solution: -2166.966887a.u.

|   |           |           |           |    |           |           |           |
|---|-----------|-----------|-----------|----|-----------|-----------|-----------|
| C | 1.267990  | -0.210762 | -0.453720 | H  | -3.601976 | -4.521611 | 1.188467  |
| N | 1.516939  | -0.190868 | 0.816229  | H  | -5.270601 | -4.373694 | 3.026737  |
| O | 2.355354  | -0.312711 | -1.277100 | Ni | -0.039661 | -0.089028 | 1.814762  |
| C | 3.518606  | -0.634640 | -0.450236 | C  | -0.049867 | -0.144023 | -1.228883 |
| C | 2.987380  | -0.257223 | 1.001926  | C  | -0.178951 | -1.471378 | -2.034287 |
| H | 3.186054  | -1.082244 | 1.684735  | H  | 0.695638  | -1.608544 | -2.672410 |
| C | 3.543271  | 1.007049  | 1.632217  | H  | -0.251016 | -2.327177 | -1.356755 |
| C | 4.658115  | 0.917356  | 2.474423  | H  | -1.073485 | -1.438330 | -2.659798 |
| C | 2.976476  | 2.265495  | 1.398014  | C  | 0.057781  | 1.055860  | -2.214816 |
| C | 5.207340  | 2.058416  | 3.059463  | H  | -0.839043 | 1.109622  | -2.833088 |
| H | 5.100120  | -0.055166 | 2.678396  | H  | 0.154371  | 1.998142  | -1.667243 |
| C | 3.521671  | 3.408236  | 1.984490  | H  | 0.931634  | 0.931296  | -2.856679 |
| H | 2.092219  | 2.346993  | 0.774860  | C  | -3.578704 | 2.161914  | -0.545901 |
| C | 4.639726  | 3.309585  | 2.814317  | C  | -4.245810 | 2.740489  | -1.637923 |
| H | 6.071835  | 1.968430  | 3.711151  | C  | -2.866377 | 3.007557  | 0.318700  |
| H | 3.066656  | 4.376929  | 1.797437  | C  | -4.220302 | 4.117767  | -1.849252 |
| H | 5.060884  | 4.199844  | 3.272708  | H  | -4.793044 | 2.105278  | -2.326132 |
| C | -1.353352 | 0.019139  | -0.443269 | C  | -2.841983 | 4.388535  | 0.107129  |
| N | -1.593504 | 0.013760  | 0.831965  | H  | -2.309008 | 2.605251  | 1.157841  |
| O | -2.440085 | 0.178453  | -1.257961 | C  | -3.520904 | 4.950106  | -0.973094 |
| C | -3.552220 | 0.629933  | -0.407350 | H  | -4.749657 | 4.540120  | -2.698752 |
| C | -3.064902 | 0.145127  | 1.018392  | H  | -2.287819 | 5.022247  | 0.793742  |
| H | -3.250968 | 0.933309  | 1.748170  | H  | -3.504556 | 6.024504  | -1.132554 |
| C | -3.669183 | -1.134912 | 1.564845  | C  | -4.838961 | -0.017463 | -0.891924 |
| C | -4.601503 | -1.064233 | 2.606380  | C  | -6.059571 | 0.377876  | -0.323932 |
| C | -3.315137 | -2.394467 | 1.064156  | C  | -4.844749 | -1.010100 | -1.876848 |
| C | -5.180075 | -2.221439 | 3.130109  | C  | -7.255614 | -0.211047 | -0.727551 |
| H | -4.872508 | -0.094482 | 3.016971  | H  | -6.073737 | 1.158395  | 0.431293  |
| C | -3.890030 | -3.552344 | 1.585727  | C  | -6.045498 | -1.596367 | -2.285289 |
| H | -2.576033 | -2.471511 | 0.273599  | H  | -3.908913 | -1.318147 | -2.327320 |
| C | -4.826449 | -3.470140 | 2.618907  | C  | -7.253671 | -1.202086 | -1.712549 |
| H | -5.899151 | -2.146130 | 3.940913  | H  | -8.190457 | 0.106597  | -0.274623 |

|   |           |           |           |    |           |           |           |
|---|-----------|-----------|-----------|----|-----------|-----------|-----------|
| H | -6.031805 | -2.362924 | -3.055095 | O  | -2.598815 | -0.232667 | -1.686005 |
| H | -8.186309 | -1.659157 | -2.030359 | C  | -3.620039 | 0.312983  | -0.762410 |
| C | 4.697972  | 0.193861  | -0.957281 | C  | -2.820406 | 0.310854  | 0.607116  |
| C | 6.013920  | -0.187548 | -0.660887 | C  | 1.046347  | -0.488589 | -1.107204 |
| C | 4.490267  | 1.361688  | -1.702317 | N  | 1.382291  | 0.187318  | -0.065730 |
| C | 7.093360  | 0.584099  | -1.089305 | O  | 1.873399  | -1.487717 | -1.495123 |
| H | 6.200263  | -1.099145 | -0.102755 | C  | 2.820792  | -1.701493 | -0.379698 |
| C | 5.571654  | 2.128337  | -2.138433 | C  | 2.710553  | -0.310072 | 0.369743  |
| H | 3.480114  | 1.665484  | -1.948802 | Ni | 0.091739  | 1.143215  | 1.124743  |
| C | 6.877542  | 1.745716  | -1.832137 | C  | -0.187203 | -0.263288 | -1.965484 |
| H | 8.105004  | 0.270211  | -0.848057 | C  | -0.419927 | -1.452997 | -2.922719 |
| H | 5.389353  | 3.027523  | -2.720371 | H  | -1.306658 | -1.265735 | -3.530183 |
| H | 7.718438  | 2.343354  | -2.171979 | H  | -0.559411 | -2.388315 | -2.374897 |
| C | 3.788551  | -2.138869 | -0.624499 | H  | 0.441470  | -1.575285 | -3.581841 |
| C | 3.614545  | -2.706466 | -1.896588 | C  | 0.003678  | 1.043629  | -2.789016 |
| C | 4.264664  | -2.957416 | 0.406504  | H  | 0.841546  | 0.925418  | -3.483201 |
| C | 3.883179  | -4.054393 | -2.123098 | H  | 0.205481  | 1.889348  | -2.128153 |
| H | 3.266378  | -2.080722 | -2.711005 | H  | -0.900145 | 1.251159  | -3.367864 |
| C | 4.541167  | -4.309023 | 0.179331  | C  | 4.192278  | -2.014869 | -0.954031 |
| H | 4.432918  | -2.556826 | 1.400848  | C  | 5.234940  | -2.356376 | -0.079865 |
| C | 4.346439  | -4.864333 | -1.083389 | C  | 4.450629  | -1.970700 | -2.327395 |
| H | 3.734489  | -4.472112 | -3.114885 | C  | 6.508895  | -2.636383 | -0.568806 |
| H | 4.905158  | -4.924258 | 0.997135  | H  | 5.045633  | -2.412037 | 0.988174  |
| H | 4.556050  | -5.915560 | -1.258200 | C  | 5.727137  | -2.258800 | -2.817565 |

**<sup>1</sup>[Ni<sup>0</sup>]-2**

B3LYP/BSI SCF energy: -2404.4814a.u.

M06/BSII SCF energy in solution: -2403.401699a.u.

M06/BSII free energy in solution: -2402.611152a.u.

|   |           |           |           |   |          |           |           |
|---|-----------|-----------|-----------|---|----------|-----------|-----------|
| C | -1.402194 | -0.074594 | -1.073594 | H | 7.304931 | -2.895346 | 0.123346  |
| N | -1.411398 | 0.276379  | 0.160973  | H | 5.909449 | -2.224302 | -3.887996 |
|   |           |           |           | H | 7.752435 | -2.811607 | -2.324406 |
|   |           |           |           | C | 2.244788 | -2.875023 | 0.429524  |
|   |           |           |           | C | 1.359897 | -2.681451 | 1.501716  |
|   |           |           |           | C | 2.528299 | -4.190972 | 0.029412  |

|   |           |           |           |   |           |           |           |
|---|-----------|-----------|-----------|---|-----------|-----------|-----------|
| C | 0.795105  | -3.773649 | 2.165374  | C | -3.116312 | -0.812881 | 1.586252  |
| H | 1.080760  | -1.683552 | 1.824384  | C | -3.804296 | -0.525244 | 2.770864  |
| C | 1.963927  | -5.279837 | 0.691357  | C | -2.719457 | -2.133774 | 1.343630  |
| H | 3.200621  | -4.363132 | -0.804179 | C | -4.102940 | -1.533398 | 3.688777  |
| C | 1.097858  | -5.075185 | 1.767354  | H | -4.101410 | 0.499126  | 2.980676  |
| H | 0.111078  | -3.596014 | 2.989606  | C | -3.016941 | -3.144123 | 2.257797  |
| H | 2.204233  | -6.288420 | 0.366948  | H | -2.167676 | -2.376902 | 0.441313  |
| H | 0.662829  | -5.923133 | 2.288967  | C | -3.712050 | -2.847851 | 3.432702  |
| C | -3.919287 | 1.729668  | -1.278014 | H | -4.634085 | -1.289437 | 4.604404  |
| C | -3.183750 | 2.846505  | -0.848957 | H | -2.702259 | -4.163257 | 2.052007  |
| C | -4.880885 | 1.912529  | -2.284415 | H | -3.941809 | -3.635145 | 4.145102  |
| C | -3.421507 | 4.108807  | -1.397603 | H | 2.684900  | -0.474793 | 1.446862  |
| H | -2.408233 | 2.748557  | -0.096106 | C | 3.813779  | 0.693122  | 0.082356  |
| C | -5.116209 | 3.172850  | -2.831731 | C | 4.776987  | 0.952606  | 1.063570  |
| H | -5.452448 | 1.061921  | -2.639677 | C | 3.908895  | 1.360100  | -1.145345 |
| C | -4.389679 | 4.278609  | -2.386593 | C | 5.817585  | 1.851457  | 0.825511  |
| H | -2.844160 | 4.958879  | -1.045582 | H | 4.706832  | 0.453688  | 2.026857  |
| H | -5.869960 | 3.289530  | -3.605304 | C | 4.945822  | 2.260499  | -1.386632 |
| H | -4.575891 | 5.262451  | -2.807765 | H | 3.163918  | 1.184362  | -1.914700 |
| C | -4.839988 | -0.591496 | -0.791043 | C | 5.905172  | 2.508151  | -0.402195 |
| C | -4.860011 | -1.789096 | -1.512443 | H | 6.552722  | 2.044000  | 1.601685  |
| C | -5.980263 | -0.220615 | -0.062682 | H | 5.003124  | 2.772282  | -2.343181 |
| C | -5.997100 | -2.601334 | -1.504309 | H | 6.711129  | 3.211764  | -0.589702 |
| H | -3.987284 | -2.082607 | -2.083390 | C | -0.624384 | 2.053874  | 2.641308  |
| C | -7.110920 | -1.034197 | -0.050184 | H | -0.900172 | 1.360004  | 3.439827  |
| H | -5.984923 | 0.713852  | 0.490809  | H | -1.395728 | 2.807569  | 2.446631  |
| C | -7.124091 | -2.229698 | -0.773081 | H | 1.488175  | 1.967811  | 3.131393  |
| H | -5.997510 | -3.526496 | -2.073830 | C | 1.116053  | 3.836704  | 2.041070  |
| H | -7.983409 | -0.732385 | 0.522067  | H | 1.060185  | 4.483292  | 2.932668  |
| H | -8.006828 | -2.862495 | -0.767029 | H | 0.352362  | 4.219963  | 1.347950  |
| C | 0.755169  | 2.411059  | 2.446486  | C | 2.497065  | 4.000396  | 1.394981  |
| H | -2.993054 | 1.250552  | 1.130333  | H | 3.266751  | 3.619034  | 2.081538  |

H 2.545125 3.361456 0.506578  
C 2.856982 5.440406 0.992096  
H 3.784077 5.418024 0.403719  
H 2.080647 5.831516 0.318226  
C 3.041169 6.409895 2.166532  
H 3.340594 7.405050 1.818615  
H 2.120049 6.527238 2.746173  
H 3.817508 6.050981 2.853128

**<sup>1</sup>IM2-R**

B3LYP/BSI SCF energy: -2699.063481a.u.

M06/BSII SCF energy in solution: -2697.868744a.u.

M06/BSII free energy in solution: -2697.070272a.u.

C -1.821535 -0.390826 -1.311449  
N -1.678128 -0.019764 -0.093554  
O -3.081014 -0.551959 -1.762878  
C -3.973081 0.044452 -0.729295  
C -3.014666 0.051018 0.529891  
C 0.611820 -0.794394 -1.607047  
N 1.043489 -0.124237 -0.596018  
O 1.422662 -1.756173 -2.092000  
C 2.463931 -1.978882 -1.057398  
C 2.425703 -0.591869 -0.305710  
Ni -0.067660 0.941698 0.561715  
C -0.712366 -0.594675 -2.329286  
C -1.041402 -1.808689 -3.225204  
H -1.996984 -1.643860 -3.725693  
H -1.102753 -2.732630 -2.644371  
H -0.264427 -1.937247 -3.980870  
C -0.621781 0.696810 -3.194661  
H 0.131805 0.563572 -3.976797

H -0.348969 1.558538 -2.580908  
H -1.586642 0.888152 -3.671376  
C 3.778746 -2.310132 -1.742107  
C 4.875471 -2.681822 -0.951105  
C 3.931222 -2.258213 -3.130924  
C 6.102562 -2.982002 -1.538028  
H 4.765985 -2.742272 0.127897  
C 5.160071 -2.569489 -3.718664  
H 3.088247 -1.978406 -3.751581  
C 6.249299 -2.928329 -2.926386  
H 6.943428 -3.262884 -0.910573  
H 5.261679 -2.529149 -4.799500  
H 7.204488 -3.167699 -3.384564  
C 1.945839 -3.161297 -0.222371  
C 1.356070 -3.014845 1.039530  
C 1.990419 -4.443809 -0.796005  
C 0.835531 -4.124441 1.713455  
H 1.287691 -2.046730 1.521454  
C 1.469095 -5.547101 -0.125898  
H 2.442403 -4.574207 -1.773981  
C 0.890284 -5.391193 1.136671  
H 0.383165 -3.985814 2.690661  
H 1.519199 -6.529475 -0.586947  
H 0.489371 -6.251824 1.664690  
C -4.300887 1.453275 -1.246499  
C -3.556275 2.584398 -0.876231  
C -5.317671 1.605576 -2.203409  
C -3.836112 3.832380 -1.439588  
H -2.747586 2.519590 -0.155683  
C -5.593379 2.850629 -2.764626  
H -5.899275 0.741556 -2.507238  
C -4.853858 3.971676 -2.381753



H -3.249019 4.694105 -1.136034  
H -6.388277 2.944471 -3.499094  
H -5.069725 4.944248 -2.814666  
C -5.208007 -0.827996 -0.587633  
C -5.349590 -2.039420 -1.271206  
C -6.236830 -0.407502 0.268200  
C -6.496894 -2.818575 -1.099169  
H -4.564350 -2.370518 -1.940417  
C -7.376612 -1.188549 0.443914  
H -6.147665 0.538873 0.793724  
C -7.511650 -2.399027 -0.240713  
H -6.593271 -3.755266 -1.640910  
H -8.161622 -0.849778 1.113759  
H -8.402136 -3.006203 -0.106729  
C 1.047810 3.804559 1.255553  
C 0.561222 2.384189 1.618038  
C 2.319304 3.514608 2.081693  
H 2.594384 4.292445 2.804918  
H 3.191772 3.247376 1.474220  
N 1.613620 2.367482 2.658988  
O -0.708139 2.082083 1.835212  
C 2.167261 1.308140 3.348590  
C 3.502269 1.351768 3.803619  
C 1.390220 0.164515 3.644113  
C 4.040354 0.282120 4.518625  
H 4.110159 2.228153 3.600000  
C 1.949965 -0.896632 4.352154  
H 0.350395 0.143562 3.338069  
C 3.276337 -0.854234 4.794386  
H 5.070164 0.340992 4.862541  
H 1.332552 -1.763176 4.577086  
H 3.700082 -1.682906 5.353394

H -3.098991 1.002753 1.053882  
C -3.190690 -1.050717 1.561697  
C -3.641144 -0.717995 2.844482  
C -2.891938 -2.390016 1.279170  
C -3.804532 -1.700892 3.822262  
H -3.852348 0.320922 3.083646  
C -3.053729 -3.374058 2.253523  
H -2.523917 -2.669516 0.296927  
C -3.512902 -3.032912 3.528126  
H -4.150228 -1.422736 4.813683  
H -2.816074 -4.407299 2.017181  
H -3.636242 -3.799906 4.287481  
H 2.523207 -0.742221 0.768439  
C 3.473285 0.425076 -0.725314  
C 4.494598 0.759105 0.171888  
C 3.466794 1.021443 -1.992098  
C 5.496939 1.660717 -0.192881  
H 4.500347 0.322668 1.167082  
C 4.467163 1.919537 -2.359139  
H 2.674588 0.790563 -2.696854  
C 5.487644 2.240844 -1.461342  
H 6.281133 1.909637 0.516544  
H 4.447844 2.373097 -3.345920  
H 6.265119 2.943130 -1.747894  
Br 1.410984 4.152645 -0.734027  
C 0.161222 4.926140 1.758547  
H -0.001538 4.778295 2.832617  
H 0.618796 5.906403 1.598617  
H -0.812358 4.897896 1.264472

<sup>4</sup>IM2-S

B3LYP/BSI SCF energy: -2699.065264a.u.

M06/BSII SCF energy in solution: -2697.870805a.u.

M06/BSII free energy in solution: -2697.072415a.u.

C -1.642965 -1.094953 -1.201623

N -1.555799 -0.448291 -0.099059

O -2.881501 -1.392912 -1.644110

C -3.816386 -0.570820 -0.820440

C -2.920406 -0.289170 0.446572

C 0.837190 -1.319520 -1.401978

N 1.166648 -0.349147 -0.620413

O 1.793503 -2.229429 -1.676136

C 2.880512 -2.003479 -0.690283

C 2.611940 -0.498437 -0.303634

Ni -0.070474 0.817976 0.269138

C -0.498716 -1.527730 -2.099891

C -0.688769 -3.015193 -2.479954

H -1.656043 -3.144988 -2.968418

H -0.648469 -3.660179 -1.598112

H 0.099560 -3.331203 -3.164984

C -0.527118 -0.647723 -3.383220

H 0.262485 -0.968579 -4.069181

H -0.377409 0.405905 -3.135720

H -1.491798 -0.757958 -3.883856

C 4.218551 -2.268789 -1.358417

C 5.381598 -2.226751 -0.575698

C 4.330023 -2.548193 -2.723794

C 6.630785 -2.446986 -1.151248

H 5.307514 -2.029013 0.489783

C 5.583228 -2.777856 -3.297759

H 3.436756 -2.591346 -3.335790

C 6.736387 -2.724837 -2.516468

H 7.521966 -2.406888 -0.531758

H 5.653280 -2.998964 -4.359025

H 7.709854 -2.901930 -2.964244

C 2.601052 -2.997302 0.448307

C 1.972741 -2.633523 1.647226

C 2.909088 -4.352067 0.237661

C 1.674193 -3.599308 2.613081

H 1.702629 -1.604538 1.855152

C 2.607603 -5.313222 1.198995

H 3.392923 -4.651552 -0.686360

C 1.989623 -4.938632 2.394863

H 1.191904 -3.292998 3.536414

H 2.859469 -6.353974 1.016179

H 1.759221 -5.685503 3.149238

C -4.099648 0.685819 -1.658524

C -3.495580 1.927888 -1.411917

C -4.947784 0.560783 -2.772071

C -3.750068 3.017417 -2.251784

H -2.818879 2.081385 -0.577665

C -5.193898 1.645226 -3.610189

H -5.421683 -0.394048 -2.976908

C -4.597006 2.881772 -3.349833

H -3.278111 3.970861 -2.032850

H -5.856762 1.526491 -4.462716

H -4.794323 3.731490 -3.997274

C -5.074677 -1.378063 -0.555561

C -5.198567 -2.718005 -0.935358

C -6.146546 -0.756215 0.101571

C -6.372493 -3.424572 -0.660847

H -4.379715 -3.205973 -1.450455

C -7.312495 -1.464694 0.382456

H -6.070217 0.289169 0.386349

C -7.430669 -2.803379 0.000435

H -6.455581 -4.463570 -0.967144  
H -8.131498 -0.968907 0.895360  
H -8.341947 -3.354244 0.214310  
C 0.691486 3.824896 0.135421  
C 0.298623 2.585413 0.951353  
C 1.883959 3.993440 1.100217  
H 2.001518 4.975134 1.565854  
H 2.833140 3.687870 0.635673  
N 1.288934 2.971777 1.971021  
O -0.908677 2.135051 1.204342  
C 1.961190 2.179104 2.878580  
C 3.277956 2.485740 3.283584  
C 1.325815 1.051793 3.449172  
C 3.935736 1.684396 4.216538  
H 3.774548 3.361825 2.877654  
C 2.003230 0.260507 4.373945  
H 0.297759 0.837795 3.180581  
C 3.311953 0.561849 4.765427  
H 4.947333 1.945401 4.517807  
H 1.491736 -0.594686 4.809562  
H 3.827676 -0.055843 5.494309  
C 0.915750 3.752023 -1.355145  
H 1.667273 2.984446 -1.564167  
H 1.266500 4.707886 -1.754517  
H -0.009957 3.476898 -1.868148  
H -3.039529 0.742827 0.771540  
C -3.125226 -1.173227 1.665811  
C -3.649985 -0.608769 2.834337  
C -2.789352 -2.533502 1.667184  
C -3.847637 -1.385925 3.977055  
H -3.893606 0.450200 2.853444  
C -2.984905 -3.312134 2.807003

H -2.369182 -2.990120 0.776398  
C -3.516864 -2.740916 3.965557  
H -4.251483 -0.929063 4.875904  
H -2.719863 -4.365560 2.790904  
H -3.666539 -3.347697 4.854063  
H 2.749841 -0.357039 0.767153  
C 3.451688 0.546787 -1.018252  
C 4.390277 1.285236 -0.287642  
C 3.321683 0.792708 -2.391932  
C 5.191207 2.241106 -0.917075  
H 4.483670 1.125444 0.783279  
C 4.119069 1.747597 -3.021635  
H 2.592955 0.239579 -2.975913  
C 5.058756 2.473841 -2.286045  
H 5.913109 2.806221 -0.334471  
H 4.006056 1.925896 -4.087194  
H 5.678490 3.218639 -2.776790  
Br -0.684547 5.375454 0.449500

#### 4

B3LYP/BSI SCF energy: -237.100557a.u.

M06/BSII SCF energy in solution: -236.944231a.u.

M06/BSII free energy in solution: -236.786731a.u.

C -1.415104 2.904624 0.000000  
H -0.901040 3.299813 0.883884  
H -0.901040 3.299813 -0.883884  
C -1.415104 1.372298 0.000000  
H -1.965666 1.005857 0.877353  
H -1.965666 1.005857 -0.877353  
C -0.005504 0.766926 0.000000  
H 0.545688 1.134307 0.877862

H 0.545688 1.134307 -0.877862  
C 0.005504 -0.766926 0.000000  
H -0.545688 -1.134307 0.877862  
H -0.545688 -1.134307 -0.877862  
C 1.415104 -1.372298 0.000000  
H 1.965666 -1.005857 0.877353  
H 1.965666 -1.005857 -0.877353  
C 1.415104 -2.904624 0.000000  
H 0.901040 -3.299813 0.883884  
H 2.433753 -3.306781 0.000000  
H 0.901040 -3.299813 -0.883884  
H -2.433753 3.306781 0.000000

**<sup>1</sup>TS7-R**

B3LYP/BSI SCF energy: -2699.059166a.u.

M06/BSII SCF energy in solution: -2697.871105a.u.

M06/BSII free energy in solution: -2697.076798a.u.

C 1.228439 -1.733840 -0.851582  
N 1.400660 -0.688754 -0.116651  
O 2.324785 -2.469642 -1.110457  
C 3.385519 -2.020446 -0.188082  
C 2.850457 -0.576792 0.177851  
C -1.294618 -1.689900 -0.929003  
N -1.399596 -0.751256 -0.065253  
O -2.438465 -2.237759 -1.377719  
C -3.535016 -1.327996 -0.922042  
C -2.835769 -0.608088 0.288341  
Ni 0.001550 0.510677 0.502924  
C -0.026651 -2.235654 -1.549674  
C 0.025206 -1.759775 -3.032299  
H 0.920596 -2.155026 -3.518558

H 0.034769 -0.668436 -3.094546  
H -0.856163 -2.127573 -3.562022  
C -0.070052 -3.784376 -1.502258  
H -0.979893 -4.136193 -1.990534  
H -0.059484 -4.150033 -0.471691  
H 0.794327 -4.197253 -2.023574  
C -4.753605 -2.159271 -0.566261  
C -5.897177 -1.497829 -0.095520  
C -4.782172 -3.549995 -0.705200  
C -7.040066 -2.217015 0.245068  
H -5.894110 -0.415995 0.001861  
C -5.932602 -4.269259 -0.369324  
H -3.907031 -4.070725 -1.076057  
C -7.062145 -3.607556 0.109031  
H -7.914881 -1.690597 0.614937  
H -5.940779 -5.349475 -0.483736  
H -7.954505 -4.167749 0.372072  
C -3.798541 -0.396423 -2.116105  
C -3.249263 0.891113 -2.213438  
C -4.548063 -0.887133 -3.198017  
C -3.452920 1.667327 -3.358009  
H -2.659534 1.316013 -1.409061  
C -4.748576 -0.113569 -4.338975  
H -4.981980 -1.880043 -3.140778  
C -4.202309 1.169546 -4.422502  
H -3.021312 2.662908 -3.402809  
H -5.337114 -0.511385 -5.160758  
H -4.363926 1.776203 -5.308885  
C 3.362479 -2.988539 1.005027  
C 3.632113 -2.583135 2.317958  
C 3.126212 -4.350697 0.761576  
C 3.645114 -3.510371 3.363994

|   |           |           |           |   |           |           |           |
|---|-----------|-----------|-----------|---|-----------|-----------|-----------|
| H | 3.842214  | -1.544377 | 2.550609  | C | -1.198997 | 6.052710  | -2.760185 |
| C | 3.133370  | -5.274050 | 1.804787  | H | 0.845124  | 6.688817  | -3.017676 |
| H | 2.936116  | -4.685120 | -0.252245 | H | -3.129023 | 5.255384  | -2.218063 |
| C | 3.390419  | -4.856837 | 3.112804  | H | -1.585361 | 6.678170  | -3.559013 |
| H | 3.850877  | -3.171119 | 4.374681  | C | 1.507113  | 1.614680  | 2.943174  |
| H | 2.942704  | -6.322456 | 1.594427  | H | 1.646520  | 2.364849  | 3.730246  |
| H | 3.395400  | -5.575709 | 3.926535  | H | 2.455525  | 1.080452  | 2.798605  |
| C | 4.713527  | -2.072361 | -0.935823 | H | 0.751591  | 0.905966  | 3.293552  |
| C | 4.757237  | -2.007475 | -2.334345 | H | 2.959993  | -0.408224 | 1.247207  |
| C | 5.918776  | -2.156544 | -0.226181 | C | 3.497536  | 0.591946  | -0.546501 |
| C | 5.979336  | -2.024773 | -3.006760 | C | 4.608001  | 1.214973  | 0.038601  |
| H | 3.834617  | -1.953935 | -2.899859 | C | 3.030696  | 1.065611  | -1.777997 |
| C | 7.140286  | -2.162055 | -0.899555 | C | 5.244969  | 2.280742  | -0.595933 |
| H | 5.907323  | -2.231032 | 0.856036  | H | 4.976031  | 0.868527  | 1.000995  |
| C | 7.175619  | -2.097741 | -2.292744 | C | 3.661251  | 2.138319  | -2.411543 |
| H | 5.993617  | -1.981083 | -4.091926 | H | 2.157642  | 0.614318  | -2.237017 |
| H | 8.063901  | -2.226976 | -0.331983 | C | 4.771694  | 2.746657  | -1.824520 |
| H | 8.126341  | -2.109988 | -2.817393 | H | 6.101995  | 2.753610  | -0.125800 |
| C | 1.062342  | 2.295037  | 1.694849  | H | 3.278406  | 2.501762  | -3.360559 |
| C | -0.204168 | 2.603172  | 1.087725  | H | 5.260443  | 3.582553  | -2.316030 |
| C | 1.651692  | 3.480588  | 0.917846  | H | -3.081320 | 0.451354  | 0.290214  |
| H | 2.408106  | 3.240977  | 0.165551  | C | -3.078404 | -1.133383 | 1.693512  |
| H | 1.948698  | 4.316799  | 1.556743  | C | -3.497082 | -0.237060 | 2.683672  |
| N | 0.294091  | 3.655152  | 0.340622  | C | -2.840425 | -2.469983 | 2.044699  |
| O | -1.286215 | 1.942740  | 1.004429  | C | -3.688817 | -0.667618 | 3.998169  |
| C | -0.203178 | 4.445666  | -0.682111 | H | -3.645013 | 0.809162  | 2.432981  |
| C | 0.665218  | 5.263941  | -1.425057 | C | -3.035036 | -2.901734 | 3.355330  |
| C | -1.580937 | 4.447996  | -0.976872 | H | -2.510304 | -3.180571 | 1.292844  |
| C | 0.163308  | 6.057382  | -2.454596 | C | -3.461585 | -2.001416 | 4.335559  |
| H | 1.724180  | 5.278855  | -1.187890 | H | -4.002353 | 0.044512  | 4.755297  |
| C | -2.062201 | 5.247647  | -2.010420 | H | -2.853246 | -3.941408 | 3.612740  |
| H | -2.251926 | 3.845573  | -0.376366 | H | -3.607939 | -2.338501 | 5.357683  |

Br -0.143300 4.582868 3.757864

<sup>1</sup>TS7-S

B3LYP/BSI SCF energy: -2699.059542a.u.

M06/BSII SCF energy in solution: -2697.8683764a.u.

M06/BSII free energy in solution: -2697.07314a.u.

C -1.154229 -1.693144 -0.966154

N -1.233353 -0.813265 -0.033194

O -2.298288 -2.253654 -1.378571

C -3.397777 -1.393268 -0.824245

C -2.647781 -0.741113 0.398594

C 1.345862 -1.633001 -0.997605

N 1.512376 -0.481471 -0.441039

O 2.396233 -2.464458 -0.988690

C 3.395560 -1.900441 -0.042661

C 2.918230 -0.391356 0.028660

Ni 0.055751 0.707313 0.030523

C 0.097056 -2.142353 -1.701866

C 0.108108 -3.687358 -1.780778

H -0.801680 -4.028930 -2.276422

H 0.159094 -4.139933 -0.786964

H 0.972901 -4.028157 -2.352198

C 0.057442 -1.544027 -3.138727

H 0.923341 -1.894280 -3.708158

H 0.065379 -0.452290 -3.112384

H -0.852273 -1.873640 -3.645244

C 4.784978 -2.102632 -0.621342

C 5.898339 -1.732327 0.147476

C 4.989695 -2.635666 -1.897577

C 7.188336 -1.882643 -0.355944

H 5.755740 -1.332173 1.147032

C 6.284898 -2.792136 -2.398375

H 4.138349 -2.933075 -2.498226

C 7.386579 -2.414438 -1.632652

H 8.039313 -1.587844 0.250879

H 6.427805 -3.211677 -3.389955

H 8.392417 -2.535348 -2.023636

C 3.176679 -2.667812 1.270253

C 2.253397 -2.239623 2.237700

C 3.831353 -3.893272 1.471373

C 2.007853 -3.005575 3.379138

H 1.700758 -1.314594 2.115237

C 3.586800 -4.656856 2.611723

H 4.539783 -4.250286 0.732070

C 2.676333 -4.213985 3.572711

H 1.289272 -2.651511 4.112152

H 4.110837 -5.598274 2.748466

H 2.489446 -4.806189 4.463725

C -3.733456 -0.400016 -1.944191

C -3.431785 0.968153 -1.890511

C -4.322969 -0.913612 -3.113595

C -3.718568 1.807290 -2.974087

H -2.967999 1.426858 -1.024393

C -4.601968 -0.081182 -4.194027

H -4.566259 -1.970512 -3.169880

C -4.302187 1.283536 -4.125927

H -3.468301 2.862608 -2.888501

H -5.060544 -0.496692 -5.087254

H -4.526584 1.934225 -4.966376

C -4.572622 -2.283496 -0.463255

C -4.451054 -3.673001 -0.356464

C -5.813224 -1.686919 -0.195804

C -5.550887 -4.452106 0.008992

H -3.499304 -4.146132 -0.567881  
C -6.906172 -2.465148 0.181007  
H -5.925772 -0.611540 -0.295747  
C -6.779549 -3.852245 0.282718  
H -5.443267 -5.530863 0.078661  
H -7.859518 -1.986983 0.385935  
H -7.633623 -4.459580 0.567877  
C 0.550886 2.858244 -0.744412  
C -0.357086 2.838724 0.376848  
C 1.381860 3.882416 0.038063  
H 1.387408 4.881616 -0.408135  
H 2.388389 3.569878 0.334034  
N 0.382732 3.733264 1.125726  
O -1.266531 2.012035 0.698738  
C 0.408741 4.095950 2.466609  
C 1.445884 4.913379 2.946520  
C -0.601142 3.661661 3.346107  
C 1.475830 5.280559 4.290305  
H 2.213377 5.267121 2.265106  
C -0.552659 4.039992 4.684734  
H -1.407219 3.045633 2.966504  
C 0.481513 4.846322 5.168718  
H 2.280387 5.916582 4.648949  
H -1.337430 3.703153 5.356400  
H 0.507062 5.138342 6.214070  
C 0.448528 2.644836 -2.216571  
H 1.340198 2.142128 -2.608064  
H 0.340781 3.614887 -2.714226  
H -0.441162 2.062475 -2.468191  
H -2.926084 0.305540 0.490860  
C -2.840202 -1.386016 1.761974  
C -3.716396 -0.785905 2.675157

C -2.169265 -2.554763 2.143229  
C -3.928220 -1.345234 3.935626  
H -4.231394 0.130223 2.398469  
C -2.376400 -3.114444 3.404419  
H -1.470690 -3.028287 1.460523  
C -3.258530 -2.512802 4.303945  
H -4.609783 -0.863666 4.630690  
H -1.847387 -4.021507 3.683413  
H -3.418338 -2.947805 5.286324  
H 2.916115 -0.070673 1.071051  
C 3.716730 0.629571 -0.761037  
C 4.504729 1.559695 -0.072581  
C 3.700339 0.664261 -2.161348  
C 5.265608 2.503579 -0.765445  
H 4.523075 1.546938 1.014656  
C 4.457212 1.607172 -2.855985  
H 3.092049 -0.044411 -2.714715  
C 5.242305 2.529512 -2.160080  
H 5.869714 3.219045 -0.215378  
H 4.431943 1.624149 -3.941527  
H 5.827931 3.265539 -2.702563  
Br -1.942117 5.013270 -1.417146

<sup>1</sup>IM3-R<sup>+</sup>

B3LYP/BSI SCF energy: -2685.513197a.u.

M06/BSII SCF energy in solution: -2684.357353a.u.

M06/BSII free energy in solution: -2683.554229a.u.

C 1.255771 -1.003230 -1.034898  
N 1.403811 -0.295081 0.038785  
O 2.353384 -1.588969 -1.509777  
C 3.392220 -1.520889 -0.448210

|    |           |           |           |   |           |           |           |
|----|-----------|-----------|-----------|---|-----------|-----------|-----------|
| C  | 2.855877  | -0.284385 | 0.371669  | C | -4.832088 | 1.444143  | -3.766666 |
| C  | -1.249082 | -0.955718 | -1.099126 | H | -4.892524 | -0.632075 | -3.221472 |
| N  | -1.356714 | -0.353480 | 0.032912  | C | -4.409317 | 2.727005  | -3.408769 |
| O  | -2.376850 | -1.367722 | -1.671279 | H | -3.367467 | 3.901624  | -1.928889 |
| C  | -3.502883 | -0.717942 | -0.917119 | H | -5.385636 | 1.288792  | -4.687759 |
| C  | -2.784318 | -0.406954 | 0.448809  | H | -4.633114 | 3.574608  | -4.049494 |
| Ni | 0.016683  | 0.577349  | 1.016893  | C | 3.300858  | -2.848847 | 0.317283  |
| C  | 0.015650  | -1.216891 | -1.882561 | C | 3.452339  | -2.943847 | 1.705920  |
| C  | 0.059332  | -0.212985 | -3.074952 | C | 3.129501  | -4.031328 | -0.421023 |
| H  | 0.958860  | -0.387059 | -3.670018 | C | 3.413967  | -4.187454 | 2.344255  |
| H  | 0.053592  | 0.822283  | -2.724098 | H | 3.618955  | -2.061088 | 2.314533  |
| H  | -0.816613 | -0.369219 | -3.707882 | C | 3.083671  | -5.269041 | 0.216063  |
| C  | -0.008670 | -2.668164 | -2.426515 | H | 3.039138  | -3.978680 | -1.500614 |
| H  | -0.913776 | -2.818947 | -3.015717 | C | 3.223552  | -5.351916 | 1.603772  |
| H  | 0.009778  | -3.400269 | -1.614536 | H | 3.534964  | -4.238479 | 3.421984  |
| H  | 0.860552  | -2.838734 | -3.062189 | H | 2.949109  | -6.171177 | -0.373081 |
| C  | -4.658986 | -1.695984 | -0.824237 | H | 3.192919  | -6.316758 | 2.100367  |
| C  | -5.886668 | -1.232897 | -0.328584 | C | 4.747993  | -1.344375 | -1.118388 |
| C  | -4.535370 | -3.039960 | -1.190231 | C | 4.857788  | -0.850953 | -2.424233 |
| C  | -6.966649 | -2.102453 | -0.192679 | C | 5.916183  | -1.659090 | -0.410929 |
| H  | -6.001752 | -0.187205 | -0.058335 | C | 6.111955  | -0.676629 | -3.010442 |
| C  | -5.623411 | -3.906915 | -1.063426 | H | 3.964776  | -0.614564 | -2.990578 |
| H  | -3.595177 | -3.409970 | -1.581913 | C | 7.168722  | -1.470756 | -0.994110 |
| C  | -6.838824 | -3.443518 | -0.561865 | H | 5.851711  | -2.067653 | 0.592294  |
| H  | -7.910482 | -1.730206 | 0.193881  | C | 7.271262  | -0.980951 | -2.296898 |
| H  | -5.516761 | -4.946142 | -1.359731 | H | 6.179916  | -0.303942 | -4.028066 |
| H  | -7.682824 | -4.119267 | -0.463516 | H | 8.063840  | -1.720496 | -0.432673 |
| C  | -3.845853 | 0.531569  | -1.737343 | H | 8.246335  | -0.845281 | -2.754536 |
| C  | -3.418490 | 1.822217  | -1.392474 | C | 1.062110  | 1.681829  | 2.431999  |
| C  | -4.553420 | 0.359261  | -2.939245 | C | -0.242265 | 2.283788  | 2.288683  |
| C  | -3.702873 | 2.911135  | -2.221794 | C | 1.608937  | 3.104377  | 2.149136  |
| H  | -2.865403 | 2.010134  | -0.478943 | H | 2.130443  | 3.243100  | 1.200746  |



H 2.165788 3.567786 2.968957  
 N 0.180045 3.566067 2.070633  
 O -1.312754 1.649415 2.017076  
 C -0.395579 4.632182 1.350096  
 C 0.423683 5.641067 0.826819  
 C -1.789165 4.705478 1.193475  
 C -0.149777 6.708526 0.136191  
 H 1.499337 5.595187 0.963568  
 C -2.345593 5.779839 0.501071  
 H -2.421512 3.937083 1.623051  
 C -1.533016 6.783341 -0.033005  
 H 0.491096 7.487716 -0.265163  
 H -3.424673 5.838077 0.391891  
 H -1.974491 7.619997 -0.564810  
 C 1.527317 0.818845 3.581451  
 H 1.637165 1.414269 4.498514  
 H 2.501084 0.360451 3.381899  
 H 0.814718 0.015261 3.790643  
 H 2.958191 -0.479320 1.435761  
 C 3.508763 1.052674 0.068258  
 C 4.555037 1.491135 0.890083  
 C 3.121507 1.851468 -1.014604  
 C 5.203310 2.700278 0.636714  
 H 4.870375 0.881099 1.732797  
 C 3.764424 3.065013 -1.267075  
 H 2.309147 1.538453 -1.662418  
 C 4.807438 3.492569 -0.442837  
 H 6.014016 3.023329 1.282659  
 H 3.451389 3.674295 -2.109704  
 H 5.308993 4.434774 -0.641292  
 H -3.082604 0.575233 0.806280  
 C -2.979313 -1.388712 1.591865

C -3.777509 -1.012136 2.678701  
 C -2.384338 -2.657294 1.598127  
 C -3.987835 -1.886800 3.745386  
 H -4.233414 -0.025847 2.693575  
 C -2.590292 -3.532013 2.664710  
 H -1.756220 -2.971372 0.769900  
 C -3.394343 -3.149590 3.740551  
 H -4.609583 -1.578686 4.580462  
 H -2.124751 -4.513066 2.654402  
 H -3.554226 -3.830890 4.570699

**<sup>4</sup>IM3-S<sup>+</sup>**

B3LYP/BSI SCF energy: -2685.510646a.u.

M06/BSII SCF energy in solution: -2684.35822a.u.

M06/BSII free energy in solution: -2683.554669a.u.

C -1.336837 -1.629123 0.321610  
 N -1.382723 -0.504980 -0.305864  
 O -2.497487 -2.159213 0.692279  
 C -3.570895 -1.391639 -0.028343  
 C -2.797283 -0.052041 -0.332636  
 C 1.146580 -1.591052 0.542739  
 N 1.375719 -0.607145 -0.268916  
 O 2.137625 -1.924543 1.362935  
 C 3.124973 -0.797695 1.333890  
 C 2.799603 -0.198733 -0.084730  
 Ni 0.063610 0.323582 -1.283786  
 C -0.103978 -2.445463 0.645441  
 C -0.234795 -3.039272 2.068750  
 H -1.147315 -3.632770 2.132240  
 H -0.270613 -2.254869 2.829098  
 H 0.621329 -3.679669 2.283147

|   |           |           |           |   |           |           |           |
|---|-----------|-----------|-----------|---|-----------|-----------|-----------|
| C | -0.005430 | -3.599250 | -0.398599 | H | -4.854334 | -3.746112 | -0.078277 |
| H | 0.859805  | -4.227168 | -0.170427 | C | -4.409576 | -3.948301 | -3.441840 |
| H | 0.091966  | -3.209705 | -1.414869 | H | -3.447191 | -2.443385 | -4.646138 |
| H | -0.906064 | -4.214763 | -0.344116 | H | -5.315490 | -5.250661 | -1.978312 |
| C | 4.523721  | -1.364598 | 1.490245  | H | -4.621993 | -4.603588 | -4.281066 |
| C | 5.585083  | -0.476773 | 1.719666  | C | -4.767358 | -1.249335 | 0.894438  |
| C | 4.789881  | -2.734131 | 1.393463  | C | -4.672475 | -1.467186 | 2.273145  |
| C | 6.889758  | -0.951232 | 1.837796  | C | -5.995879 | -0.849467 | 0.349099  |
| H | 5.389680  | 0.586819  | 1.821544  | C | -5.789595 | -1.291226 | 3.092134  |
| C | 6.097270  | -3.208066 | 1.524383  | H | -3.731285 | -1.783546 | 2.707131  |
| H | 3.978426  | -3.432975 | 1.228067  | C | -7.105987 | -0.662591 | 1.170855  |
| C | 7.150007  | -2.320226 | 1.742043  | H | -6.088199 | -0.694984 | -0.721798 |
| H | 7.701503  | -0.252338 | 2.014976  | C | -7.006830 | -0.885428 | 2.545816  |
| H | 6.288775  | -4.274761 | 1.457455  | H | -5.705098 | -1.474124 | 4.159159  |
| H | 8.165337  | -2.690921 | 1.843242  | H | -8.050685 | -0.352668 | 0.734604  |
| C | 2.723734  | 0.105819  | 2.507019  | H | -7.874020 | -0.749110 | 3.184636  |
| C | 2.016764  | 1.306693  | 2.354843  | C | 1.182448  | 1.195252  | -2.785939 |
| C | 3.015857  | -0.337442 | 3.808591  | C | 0.001977  | 2.002177  | -2.591998 |
| C | 1.627110  | 2.052160  | 3.471617  | C | 1.963969  | 2.516416  | -2.589980 |
| H | 1.756409  | 1.687995  | 1.373922  | H | 2.537447  | 2.855387  | -3.457542 |
| C | 2.622032  | 0.401767  | 4.920851  | H | 2.563274  | 2.612116  | -1.680139 |
| H | 3.561698  | -1.264870 | 3.946812  | N | 0.637593  | 3.205008  | -2.436195 |
| C | 1.928566  | 1.603665  | 4.756049  | O | -1.141362 | 1.545020  | -2.260870 |
| H | 1.090365  | 2.984948  | 3.327884  | C | 0.322164  | 4.362821  | -1.690665 |
| H | 2.863500  | 0.042956  | 5.916712  | C | 1.284489  | 5.375285  | -1.577607 |
| H | 1.631026  | 2.186048  | 5.622780  | C | -0.936174 | 4.512978  | -1.089161 |
| C | -3.878210 | -2.236354 | -1.270207 | C | 0.991024  | 6.530365  | -0.854804 |
| C | -3.480310 | -1.888561 | -2.568324 | H | 2.250028  | 5.263356  | -2.061787 |
| C | -4.538411 | -3.462591 | -1.077095 | C | -1.214137 | 5.677127  | -0.374183 |
| C | -3.751257 | -2.737726 | -3.646104 | H | -1.678693 | 3.729024  | -1.178063 |
| H | -2.962506 | -0.957251 | -2.769358 | C | -0.258240 | 6.687697  | -0.251342 |
| C | -4.799573 | -4.310754 | -2.149524 | H | 1.740020  | 7.311996  | -0.771477 |

H -2.187188 5.786615 0.094762  
H -0.485087 7.590800 0.306278  
C 1.431552 0.218998 -3.910542  
H 2.292934 -0.420645 -3.710999  
H 1.619270 0.755434 -4.851168  
H 0.561143 -0.425751 -4.069254  
H -3.036799 0.294401 -1.335004  
C -3.028959 1.112766 0.616401  
C -3.932775 2.115244 0.240890  
C -2.383363 1.216486 1.854494  
C -4.199138 3.190029 1.089710  
H -4.434312 2.053351 -0.721335  
C -2.642799 2.294464 2.702083  
H -1.667999 0.461416 2.164986  
C -3.553511 3.282412 2.324290  
H -4.909490 3.953145 0.785801  
H -2.133400 2.359040 3.659017  
H -3.758128 4.118251 2.986466  
H 2.854814 0.887758 -0.040829  
C 3.684335 -0.667116 -1.226764  
C 4.673094 0.195715 -1.715401  
C 3.563948 -1.942751 -1.792612  
C 5.522888 -0.202535 -2.748175  
H 4.785766 1.186087 -1.281224  
C 4.411056 -2.343471 -2.826287  
H 2.804314 -2.630135 -1.434763  
C 5.392138 -1.474069 -3.307989  
H 6.283685 0.479856 -3.114734  
H 4.304841 -3.335222 -3.255529  
H 6.049636 -1.786243 -4.113422

<sup>2</sup>IM3-S

B3LYP/BSI SCF energy: -2685.687081a.u.  
M06/BSII SCF energy in solution: -2684.508334a.u.  
M06/BSII free energy in solution: -2683.71261a.u.  
C 1.700685 -1.086100 -0.839367  
N 1.688171 -0.305251 0.180432  
O 2.911402 -1.483061 -1.291282  
C 3.906973 -1.094790 -0.269882  
C 3.092527 -0.011042 0.550530  
C -0.801356 -1.400222 -0.974318  
N -1.065065 -0.763168 0.104148  
O -1.846316 -1.959233 -1.629701  
C -3.065945 -1.353429 -1.038108  
C -2.520451 -0.915833 0.368644  
Ni 0.134653 0.511987 1.139392  
C 0.534826 -1.601052 -1.660484  
C 0.732406 -3.114742 -1.938738  
H 1.667889 -3.275432 -2.476164  
H 0.771036 -3.684786 -1.005897  
H -0.096912 -3.486849 -2.542228  
C 0.511234 -0.817735 -3.005643  
H -0.316841 -1.172857 -3.622147  
H 0.374820 0.252729 -2.829220  
H 1.449132 -0.974509 -3.544293  
C -3.425148 -0.180943 -1.968356  
C -3.685151 -0.485647 -3.316334  
C -3.479019 1.156881 -1.559926  
C -3.979774 0.518948 -4.233044  
H -3.659740 -1.521019 -3.642842  
C -3.777841 2.165452 -2.484206  
H -3.300943 1.447150 -0.530223  
C -4.025624 1.853751 -3.818441

|   |           |           |           |   |           |           |           |
|---|-----------|-----------|-----------|---|-----------|-----------|-----------|
| H | -4.179012 | 0.261003  | -5.269585 | C | 4.615782  | -4.819345 | 1.873255  |
| H | -3.804724 | 3.196725  | -2.144163 | H | 6.183234  | -5.138174 | 0.426159  |
| H | -4.256251 | 2.640306  | -4.531513 | H | 2.987680  | -4.213043 | 3.150887  |
| C | -4.177920 | -2.389240 | -1.021260 | H | 4.787107  | -5.757408 | 2.393228  |
| C | -5.442581 | -2.006616 | -0.551279 | C | -0.617586 | 1.834452  | 2.478146  |
| C | -3.988855 | -3.700294 | -1.468435 | C | -1.898248 | 2.367616  | 1.926765  |
| C | -6.491386 | -2.922352 | -0.517445 | C | -0.068336 | 3.292512  | 2.278734  |
| H | -5.606575 | -0.986378 | -0.216550 | H | 0.119234  | 3.848514  | 3.208831  |
| C | -5.044908 | -4.615269 | -1.441902 | H | 0.779416  | 3.426226  | 1.598422  |
| H | -3.016929 | -4.004403 | -1.839132 | N | -1.367041 | 3.637766  | 1.678734  |
| C | -6.296980 | -4.231869 | -0.964566 | O | -3.043952 | 1.953837  | 1.719922  |
| H | -7.463311 | -2.611426 | -0.145399 | C | -1.803715 | 4.751446  | 0.971497  |
| H | -4.883378 | -5.629633 | -1.796102 | C | -0.925967 | 5.821991  | 0.725982  |
| H | -7.116623 | -4.944228 | -0.942681 | C | -3.133101 | 4.830921  | 0.507415  |
| C | 5.147242  | -0.562278 | -0.968165 | C | -1.366423 | 6.941505  | 0.021458  |
| C | 6.254834  | -0.185939 | -0.193673 | H | 0.096185  | 5.771061  | 1.088143  |
| C | 5.218699  | -0.431056 | -2.358079 | C | -3.552951 | 5.957129  | -0.196245 |
| C | 7.402967  | 0.321586  | -0.797220 | H | -3.809842 | 4.012708  | 0.722592  |
| H | 6.220696  | -0.296407 | 0.886275  | C | -2.678708 | 7.019189  | -0.447987 |
| C | 6.373253  | 0.073410  | -2.962932 | H | -0.674673 | 7.760282  | -0.159519 |
| H | 4.373706  | -0.728381 | -2.967519 | H | -4.582064 | 6.009108  | -0.543078 |
| C | 7.466605  | 0.453702  | -2.186760 | H | -3.017594 | 7.894510  | -0.994003 |
| H | 8.249521  | 0.611983  | -0.181910 | C | -0.657778 | 1.297604  | 3.912086  |
| H | 6.413460  | 0.166185  | -4.044496 | H | -1.286618 | 0.403980  | 3.973863  |
| H | 8.362701  | 0.846938  | -2.657738 | H | 0.339298  | 1.012314  | 4.265905  |
| C | 4.182529  | -2.374942 | 0.536082  | H | -1.060076 | 2.035232  | 4.627930  |
| C | 5.182213  | -3.263056 | 0.110148  | C | -2.751032 | -1.860066 | 1.538493  |
| C | 3.391557  | -2.743488 | 1.636410  | C | -3.458250 | -1.388129 | 2.651513  |
| C | 5.399160  | -4.470801 | 0.772156  | C | -2.257913 | -3.171942 | 1.554751  |
| H | 5.798935  | -3.005909 | -0.743924 | C | -3.682091 | -2.217864 | 3.753031  |
| C | 3.609457  | -3.953007 | 2.299194  | H | -3.804265 | -0.358268 | 2.657225  |
| H | 2.588292  | -2.103539 | 1.986178  | C | -2.481162 | -4.000014 | 2.653729  |

|   |           |           |           |    |           |           |           |
|---|-----------|-----------|-----------|----|-----------|-----------|-----------|
| H | -1.703881 | -3.554044 | 0.702615  | N  | -1.284598 | 0.466343  | 0.017397  |
| C | -3.197153 | -3.525646 | 3.756043  | O  | -1.939853 | 1.529972  | -1.840324 |
| H | -4.229902 | -1.836995 | 4.610429  | C  | -2.865384 | 2.060639  | -0.803902 |
| H | -2.098842 | -5.017160 | 2.649351  | C  | -2.612266 | 1.034409  | 0.368627  |
| H | -3.370374 | -4.171630 | 4.612294  | C  | 1.427906  | 0.157698  | -1.254486 |
| H | -2.913678 | 0.054886  | 0.662488  | N  | 1.583124  | 0.014506  | 0.011111  |
| H | 3.217447  | -0.205610 | 1.616796  | O  | 2.524103  | 0.055392  | -2.022232 |
| C | 3.418832  | 1.453911  | 0.317275  | C  | 3.706914  | -0.090861 | -1.141727 |
| C | 4.022549  | 2.194104  | 1.340326  | C  | 2.988201  | -0.391545 | 0.250135  |
| C | 3.109699  | 2.097842  | -0.888304 | Ni | 0.080492  | -0.131137 | 1.448575  |
| C | 4.321421  | 3.546580  | 1.164116  | C  | 0.150343  | 0.347188  | -2.060679 |
| H | 4.252996  | 1.711678  | 2.287103  | C  | 0.388144  | 1.392501  | -3.178048 |
| C | 3.404745  | 3.448265  | -1.066793 | H  | -0.498604 | 1.468414  | -3.807933 |
| H | 2.628011  | 1.545956  | -1.689164 | H  | 0.591301  | 2.383740  | -2.763420 |
| C | 4.013290  | 4.176774  | -0.041483 | H  | 1.233929  | 1.084256  | -3.793046 |
| H | 4.785974  | 4.106052  | 1.970875  | C  | -0.189535 | -1.031821 | -2.707473 |
| H | 3.154608  | 3.934268  | -2.005274 | H  | 0.607003  | -1.306830 | -3.402788 |
| H | 4.239064  | 5.229936  | -0.180950 | H  | -0.272245 | -1.815728 | -1.953000 |

**Br<sup>•</sup>**

B3LYP/BSI SCF energy: -13.341985a.u.  
M06/BSII SCF energy in solution: -13.307356a.u.  
M06/BSII free energy in solution: -13.324186a.u.

Br 0.000000 0.000000 0.000000

**<sup>1</sup>IM4-R**

B3LYP/BSI SCF energy: -2699.11303a.u.  
M06/BSII SCF energy in solution: -2697.90701976a.u.  
M06/BSII free energy in solution: -2697.108542a.u.

C -1.030232 0.774093 -1.204154

|    |           |           |           |   |          |           |           |
|----|-----------|-----------|-----------|---|----------|-----------|-----------|
| N  | -1.284598 | 0.466343  | 0.017397  | C | 4.496025 | -1.282542 | -1.699904 |
| O  | -1.939853 | 1.529972  | -1.840324 | C | 5.712685 | -1.110367 | -2.374743 |
| C  | -2.865384 | 2.060639  | -0.803902 | C | 3.950914 | -2.576292 | -1.621399 |
| C  | -2.612266 | 1.034409  | 0.368627  | C | 6.387359 | -2.202477 | -2.923784 |
| C  | 1.427906  | 0.157698  | -1.254486 | H | 6.141769 | -0.121275 | -2.476904 |
| N  | 1.583124  | 0.014506  | 0.011111  | C | 4.627018 | -3.663967 | -2.173493 |
| O  | 2.524103  | 0.055392  | -2.022232 | H | 2.988506 | -2.751520 | -1.150152 |
| C  | 3.706914  | -0.090861 | -1.141727 | C | 5.850952 | -3.484810 | -2.820303 |
| C  | 2.988201  | -0.391545 | 0.250135  | H | 7.332075 | -2.043912 | -3.436070 |
| Ni | 0.080492  | -0.131137 | 1.448575  | H | 4.188212 | -4.654615 | -2.097207 |
| C  | 0.150343  | 0.347188  | -2.060679 | H | 6.376636 | -4.335182 | -3.245399 |
| C  | 0.388144  | 1.392501  | -3.178048 | C | 4.471257 | 1.234053  | -1.165400 |
| H  | -0.498604 | 1.468414  | -3.807933 | C | 5.672435 | 1.362956  | -0.448015 |
| H  | 0.591301  | 2.383740  | -2.763420 |   |          |           |           |
| H  | 1.233929  | 1.084256  | -3.793046 |   |          |           |           |
| C  | -0.189535 | -1.031821 | -2.707473 |   |          |           |           |
| H  | 0.607003  | -1.306830 | -3.402788 |   |          |           |           |
| H  | -0.272245 | -1.815728 | -1.953000 |   |          |           |           |
| H  | -1.127250 | -0.952107 | -3.264552 |   |          |           |           |
| C  | 4.496025  | -1.282542 | -1.699904 |   |          |           |           |
| C  | 5.712685  | -1.110367 | -2.374743 |   |          |           |           |
| C  | 3.950914  | -2.576292 | -1.621399 |   |          |           |           |
| C  | 6.387359  | -2.202477 | -2.923784 |   |          |           |           |
| H  | 6.141769  | -0.121275 | -2.476904 |   |          |           |           |
| C  | 4.627018  | -3.663967 | -2.173493 |   |          |           |           |
| H  | 2.988506  | -2.751520 | -1.150152 |   |          |           |           |
| C  | 5.850952  | -3.484810 | -2.820303 |   |          |           |           |
| H  | 7.332075  | -2.043912 | -3.436070 |   |          |           |           |
| H  | 4.188212  | -4.654615 | -2.097207 |   |          |           |           |
| H  | 6.376636  | -4.335182 | -3.245399 |   |          |           |           |
| C  | 4.471257  | 1.234053  | -1.165400 |   |          |           |           |
| C  | 5.672435  | 1.362956  | -0.448015 |   |          |           |           |

|   |           |           |           |   |           |           |           |
|---|-----------|-----------|-----------|---|-----------|-----------|-----------|
| C | 4.003486  | 2.341988  | -1.880770 | C | 0.191242  | -2.961756 | 0.669025  |
| C | 6.374947  | 2.565790  | -0.440581 | C | -1.326170 | -2.767110 | 2.090794  |
| H | 6.060226  | 0.519403  | 0.111462  | H | -1.396891 | -3.423823 | 2.967591  |
| C | 4.707418  | 3.549575  | -1.871375 | H | -2.203487 | -2.117566 | 2.040967  |
| H | 3.092419  | 2.263194  | -2.459612 | N | -1.073085 | -3.512900 | 0.839687  |
| C | 5.893862  | 3.667863  | -1.151160 | O | 1.025727  | -3.163091 | -0.211807 |
| H | 7.299288  | 2.640882  | 0.124637  | C | -1.790511 | -4.511572 | 0.182660  |
| H | 4.323380  | 4.395279  | -2.434734 | C | -3.029526 | -4.934111 | 0.692301  |
| H | 6.440945  | 4.606087  | -1.143824 | C | -1.276210 | -5.116591 | -0.980539 |
| C | -4.277431 | 2.064688  | -1.365919 | C | -3.743416 | -5.940786 | 0.043685  |
| C | -5.307539 | 2.621541  | -0.594145 | H | -3.428802 | -4.468507 | 1.587179  |
| C | -4.583429 | 1.535274  | -2.623090 | C | -2.005069 | -6.119658 | -1.614558 |
| C | -6.617839 | 2.635764  | -1.066333 | H | -0.311190 | -4.797551 | -1.355160 |
| H | -5.081399 | 3.051230  | 0.377359  | C | -3.240603 | -6.539184 | -1.113283 |
| C | -5.897152 | 1.558119  | -3.099048 | H | -4.699514 | -6.259721 | 0.450201  |
| H | -3.795261 | 1.109159  | -3.232503 | H | -1.598543 | -6.582023 | -2.510230 |
| C | -6.918019 | 2.104145  | -2.323085 | H | -3.799748 | -7.323900 | -1.613891 |
| H | -7.404386 | 3.066469  | -0.453678 | C | 1.086739  | -2.336243 | 3.008613  |
| H | -6.117850 | 1.146785  | -4.079932 | H | 2.098056  | -2.046323 | 2.709284  |
| H | -7.938918 | 2.119460  | -2.693237 | H | 0.830742  | -1.752566 | 3.897420  |
| C | -2.360333 | 3.482922  | -0.512555 | H | 1.123766  | -3.398547 | 3.298491  |
| C | -2.648357 | 4.495027  | -1.444052 | C | 3.596184  | 0.200494  | 1.501670  |
| C | -1.553883 | 3.798620  | 0.590227  | C | 4.520564  | -0.564347 | 2.227486  |
| C | -2.154881 | 5.786100  | -1.274693 | C | 3.265344  | 1.480017  | 1.961510  |
| H | -3.268072 | 4.267901  | -2.305410 | C | 5.117438  | -0.053254 | 3.380085  |
| C | -1.063975 | 5.097425  | 0.760471  | H | 4.772815  | -1.565620 | 1.886000  |
| H | -1.291295 | 3.057552  | 1.337954  | C | 3.851765  | 1.986776  | 3.121682  |
| C | -1.361603 | 6.094011  | -0.166533 | H | 2.539612  | 2.077628  | 1.420023  |
| H | -2.394765 | 6.553019  | -2.005695 | C | 4.782017  | 1.225164  | 3.830596  |
| H | -0.449652 | 5.319561  | 1.628073  | H | 5.831176  | -0.658073 | 3.932034  |
| H | -0.982131 | 7.102396  | -0.028201 | H | 3.574199  | 2.975341  | 3.474499  |
| C | 0.069614  | -2.095799 | 1.892482  | H | 5.234522  | 1.620763  | 4.735262  |

H 2.954389 -1.475925 0.381106  
H -2.509895 1.562177 1.315439  
C -3.653211 -0.051478 0.571578  
C -4.422906 -0.037065 1.741475  
C -3.874811 -1.063148 -0.371960  
C -5.408819 -1.001975 1.957295  
H -4.239894 0.727197 2.491924  
C -4.857067 -2.028935 -0.157810  
H -3.278662 -1.104550 -1.278231  
C -5.630298 -1.997560 1.005557  
H -5.995503 -0.977517 2.871050  
H -5.010788 -2.812653 -0.892737  
H -6.395050 -2.751110 1.170891  
Br -0.554247 1.134279 3.437498

<sup>1</sup>IM4-S

B3LYP/BSI SCF energy: -2699.117137a.u.

M06/BSII SCF energy in solution: -2697.91800088a.u.

M06/BSII free energy in solution: -2697.119513a.u.

C 0.285516 1.861331 -0.218872  
N 0.788885 0.674869 -0.235470  
O 1.150272 2.889884 -0.195500  
C 2.484655 2.339946 -0.532113  
C 2.267752 0.830435 -0.134267  
C -2.159183 1.223204 -0.101279  
N -1.949814 -0.027793 0.081794  
O -3.440414 1.632929 -0.142905  
C -4.258818 0.498371 0.363752  
C -3.274637 -0.702995 0.107275  
Ni -0.177420 -1.084471 0.139910  
C -1.153557 2.334691 -0.265726

C -1.383538 3.371384 0.869933  
H -0.705379 4.216033 0.742694  
H -1.210589 2.923678 1.852881  
H -2.414210 3.726739 0.832920  
C -1.382924 3.012332 -1.648161  
H -2.397947 3.411266 -1.698222  
H -1.240413 2.297818 -2.463876  
H -0.670274 3.828532 -1.777735  
C -5.560234 0.440870 -0.417261  
C -6.539795 -0.482358 -0.023365  
C -5.812129 1.270108 -1.514197  
C -7.741352 -0.580566 -0.721128  
H -6.363514 -1.120380 0.837763  
C -7.021658 1.176186 -2.207748  
H -5.065617 1.992419 -1.822699  
C -7.987727 0.250560 -1.816790  
H -8.487810 -1.303620 -0.405634  
H -7.204717 1.830594 -3.055269  
H -8.926597 0.177376 -2.357781  
C -4.488798 0.805373 1.851293  
C -3.731841 0.219893 2.876614  
C -5.439778 1.782471 2.190874  
C -3.937400 0.595002 4.208100  
H -2.975429 -0.530236 2.668213  
C -5.638125 2.157319 3.517351  
H -6.030996 2.246846 1.408185  
C -4.888002 1.560356 4.533837  
H -3.346685 0.122070 4.987159  
H -6.382028 2.911634 3.757563  
H -5.046372 1.845710 5.569956  
C 2.642461 2.601090 -2.037399  
C 2.620913 1.596934 -3.012600

|   |          |           |           |   |           |           |           |
|---|----------|-----------|-----------|---|-----------|-----------|-----------|
| C | 2.744244 | 3.942695  | -2.448901 | C | 6.684274  | -3.190027 | -1.136697 |
| C | 2.711960 | 1.934222  | -4.368688 | H | 4.992548  | -2.226140 | -2.086075 |
| H | 2.538242 | 0.546832  | -2.753688 | C | 7.119512  | -4.003175 | -0.086452 |
| C | 2.825799 | 4.273034  | -3.798077 | H | 6.510275  | -5.113079 | 1.659686  |
| H | 2.763892 | 4.729302  | -1.700723 | H | 7.398756  | -2.818915 | -1.866762 |
| C | 2.812930 | 3.264602  | -4.766726 | H | 8.168948  | -4.265989 | 0.006763  |
| H | 2.702226 | 1.140032  | -5.109497 | C | 0.047754  | -3.268615 | -1.510303 |
| H | 2.905977 | 5.315295  | -4.093907 | H | -0.802960 | -3.656697 | -0.945415 |
| H | 2.883841 | 3.518191  | -5.820739 | H | 0.551626  | -4.124333 | -1.987803 |
| C | 3.537100 | 3.074508  | 0.282715  | H | -0.336103 | -2.632619 | -2.315283 |
| C | 3.203638 | 3.839309  | 1.405293  | H | 2.735160  | 0.188030  | -0.875194 |
| C | 4.885016 | 2.959811  | -0.085189 | C | 2.773575  | 0.419765  | 1.240819  |
| C | 4.199652 | 4.481280  | 2.144111  | C | 4.033875  | -0.183387 | 1.343118  |
| H | 2.165107 | 3.936186  | 1.699022  | C | 2.029584  | 0.626237  | 2.409119  |
| C | 5.878889 | 3.591504  | 0.660149  | C | 4.544416  | -0.562954 | 2.584279  |
| H | 5.155921 | 2.381326  | -0.963248 | H | 4.615944  | -0.372450 | 0.445841  |
| C | 5.539271 | 4.357803  | 1.777063  | C | 2.536982  | 0.244375  | 3.651671  |
| H | 3.923980 | 5.077358  | 3.009390  | H | 1.038497  | 1.064969  | 2.355585  |
| H | 6.918629 | 3.489684  | 0.363176  | C | 3.796854  | -0.348561 | 3.743377  |
| H | 6.312960 | 4.855956  | 2.353999  | H | 5.518044  | -1.040375 | 2.639683  |
| C | 1.016650 | -2.494831 | -0.601515 | H | 1.940900  | 0.401597  | 4.545782  |
| C | 2.325628 | -2.194618 | -1.300260 | H | 4.188105  | -0.651837 | 4.710206  |
| C | 1.874137 | -3.376059 | 0.362030  | H | -3.286414 | -1.391703 | 0.949454  |
| H | 1.661638 | -4.450871 | 0.327610  | C | -3.489260 | -1.520041 | -1.156086 |
| H | 1.926964 | -3.038528 | 1.398544  | C | -3.924393 | -2.845607 | -1.040800 |
| N | 3.056199 | -2.994175 | -0.438728 | C | -3.253405 | -0.996202 | -2.434271 |
| O | 2.695242 | -1.543332 | -2.274901 | C | -4.131955 | -3.629082 | -2.177150 |
| C | 4.405797 | -3.325781 | -0.330975 | H | -4.083302 | -3.271523 | -0.054170 |
| C | 4.839034 | -4.145141 | 0.724611  | C | -3.457349 | -1.777713 | -3.571046 |
| C | 5.340395 | -2.848272 | -1.270148 | H | -2.906692 | 0.026438  | -2.547944 |
| C | 6.187871 | -4.477640 | 0.839256  | C | -3.899519 | -3.096657 | -3.445460 |
| H | 4.119228 | -4.513283 | 1.448695  | H | -4.464344 | -4.657369 | -2.068775 |



H -3.269719 -1.357167 -4.554847  
H -4.054633 -3.706224 -4.330962  
Br -1.009975 -2.580568 1.919410

**Br<sup>-</sup>**

B3LYP/BSI SCF energy: -13.471995a.u.

M06/BSII SCF energy in solution: -13.51096a.u.

M06/BSII free energy in solution: -13.527136a.u.

Br 0.000000 0.000000 0.000000

**<sup>1</sup>TS8-R**

B3LYP/BSI SCF energy: -5894.946536 a.u.

M06/BSII SCF energy in solution: -5893.6337591a.u.

M06/BSII free energy in solution: -5892.619721 a.u.

C -1.112224 2.811616 -0.285036  
N -0.451872 1.999445 0.445361  
O -0.574242 4.043862 -0.483909  
C 0.806815 3.983944 0.036690  
C 0.688381 2.763785 1.020733  
H 1.572443 2.129120 0.991231  
C 0.351575 3.094387 2.476502  
C 0.976105 2.386595 3.509578  
C -0.635996 4.033873 2.816201  
C 0.649532 2.631042 4.846397  
H 1.683479 1.602037 3.275044  
C -0.961577 4.280245 4.148418  
H -1.148625 4.589540 2.039502  
C -0.313895 3.583257 5.171907  
H 1.142837 2.059860 5.627466  
H -1.721177 5.019596 4.387455

H -0.567729 3.776051 6.210620  
C -3.107238 1.273617 -0.652386  
N -2.572257 0.151272 -0.341175  
O -4.443545 1.272435 -0.862545  
C -4.983191 -0.032474 -0.490617  
C -3.643845 -0.870438 -0.248959  
H -3.642059 -1.221334 0.783389  
C -3.453129 -2.084595 -1.141175  
C -3.861204 -3.338327 -0.664030  
C -2.943054 -1.991286 -2.440622  
C -3.778785 -4.474613 -1.469133  
H -4.248692 -3.430315 0.348069  
C -2.850518 -3.129018 -3.244080  
H -2.576818 -1.042127 -2.813103  
C -3.274107 -4.370868 -2.766900  
H -4.103077 -5.436478 -1.082049  
H -2.443316 -3.039274 -4.247071  
H -3.208224 -5.252007 -3.399184  
C -2.508356 2.659735 -0.855874  
C -2.535776 3.000338 -2.370447  
H -2.134421 4.004686 -2.520689  
H -1.932906 2.286692 -2.934628  
H -3.567653 2.980332 -2.730509  
C -3.395505 3.689182 -0.089663  
H -4.410817 3.673658 -0.486140  
H -3.432440 3.464083 0.979916  
H -2.980422 4.689451 -0.222674  
Ni -0.521190 -0.195702 0.111179  
Br -0.133821 0.207962 -2.525220  
Si 2.728003 -1.293816 0.150368  
H 1.196879 -0.710798 0.232841  
O 3.826873 -2.007614 1.233504

|   |           |           |           |   |           |           |           |
|---|-----------|-----------|-----------|---|-----------|-----------|-----------|
| O | 1.953177  | -2.881247 | -0.110509 | H | -6.466937 | 0.055443  | -4.949250 |
| C | 3.987229  | -3.355449 | 1.615763  | H | -8.119253 | -1.767737 | -4.571956 |
| H | 4.439474  | -3.937157 | 0.794291  | C | -5.808874 | 0.174094  | 0.788041  |
| H | 3.022933  | -3.813936 | 1.853829  | C | -6.531367 | 1.366206  | 0.946659  |
| C | 4.912052  | -3.426972 | 2.827015  | C | -5.922701 | -0.809629 | 1.777930  |
| H | 5.035389  | -4.464862 | 3.157773  | C | -7.324325 | 1.576059  | 2.072966  |
| H | 5.903853  | -3.024476 | 2.589656  | H | -6.467102 | 2.132312  | 0.182340  |
| H | 4.499589  | -2.845398 | 3.657242  | C | -6.724708 | -0.603825 | 2.903644  |
| C | 0.807752  | -3.076335 | -0.897440 | H | -5.392183 | -1.751462 | 1.684186  |
| H | -0.011191 | -2.405926 | -0.582638 | C | -7.423858 | 0.591566  | 3.058590  |
| H | 0.991789  | -2.810158 | -1.952823 | H | -7.868066 | 2.510446  | 2.179235  |
| C | 0.319566  | -4.521350 | -0.782107 | H | -6.794011 | -1.380356 | 3.659797  |
| H | 0.141881  | -4.784002 | 0.264601  | H | -8.041291 | 0.755165  | 3.936833  |
| H | -0.607379 | -4.660557 | -1.347434 | C | 1.159873  | 5.328250  | 0.665622  |
| H | 1.052425  | -5.244742 | -1.170779 | C | 2.364309  | 5.450383  | 1.372587  |
| O | 3.224788  | 0.301455  | 0.714621  | C | 0.355381  | 6.460754  | 0.501400  |
| C | 3.785042  | 0.611204  | 1.971209  | C | 2.746038  | 6.674060  | 1.917437  |
| H | 3.478042  | 1.636025  | 2.231017  | H | 3.006934  | 4.583880  | 1.497364  |
| H | 3.408948  | -0.052935 | 2.755258  | C | 0.741172  | 7.688542  | 1.045612  |
| C | 5.317277  | 0.582458  | 1.978566  | H | -0.575540 | 6.381130  | -0.048348 |
| H | 5.713119  | 1.262808  | 1.211357  | C | 1.935280  | 7.800423  | 1.756069  |
| H | 5.707822  | 0.914461  | 2.948775  | H | 3.678777  | 6.747893  | 2.469221  |
| H | 5.655931  | -0.442947 | 1.807249  | H | 0.103371  | 8.557804  | 0.910706  |
| C | -5.872148 | -0.510994 | -1.641834 | H | 2.234062  | 8.754970  | 2.179464  |
| C | -6.810548 | -1.531537 | -1.437538 | C | 1.739208  | 3.777953  | -1.172783 |
| C | -5.760256 | 0.051126  | -2.919447 | C | 1.552739  | 4.615218  | -2.286016 |
| C | -7.608902 | -1.985446 | -2.486390 | C | 2.808226  | 2.876517  | -1.180897 |
| H | -6.928760 | -1.970539 | -0.452796 | C | 2.417250  | 4.562958  | -3.375676 |
| C | -6.566490 | -0.397786 | -3.967022 | H | 0.728585  | 5.321122  | -2.291510 |
| H | -5.048383 | 0.848118  | -3.096630 | C | 3.691349  | 2.835367  | -2.269777 |
| C | -7.492315 | -1.418819 | -3.756553 | H | 2.970459  | 2.162780  | -0.378866 |
| H | -8.328772 | -2.778663 | -2.306163 | C | 3.501714  | 3.678199  | -3.366521 |

H 2.255890 5.223973 -4.223107  
H 4.498797 2.104693 -2.262450  
H 4.195373 3.653188 -4.204110  
O 3.966961 -2.126694 -3.591994  
P 4.612124 -1.479052 -2.352806  
O 5.455042 -2.461836 -1.503598  
O 5.307732 -0.123922 -2.602960  
O 3.262682 -1.091994 -1.431623  
K 2.705327 0.269198 -3.798240  
K 6.915619 -0.569012 -0.626231  
K 3.547696 -4.217233 -1.968129  
C 0.204497 -1.468819 2.761578  
N -0.280284 -2.778403 2.751315  
C 0.124486 -3.971229 3.341108  
C 1.278557 -4.015683 4.147854  
C -0.630398 -5.141809 3.150722  
C 1.659408 -5.217564 4.738408  
H 1.846171 -3.104959 4.294928  
C -0.231852 -6.336255 3.750609  
H -1.525089 -5.110010 2.536488  
C 0.914030 -6.385342 4.546154  
H 2.550296 -5.240008 5.360559  
H -0.825955 -7.233028 3.594984  
H 1.219283 -7.316616 5.013855  
C -1.825428 0.026503 2.769567  
H -2.746536 0.303237 2.248397  
H -1.278665 0.946333 2.977817  
H -2.117042 -0.411610 3.737869  
C -0.966346 -0.944561 1.953067  
C -1.483544 -2.429909 1.987389  
H -1.559572 -2.957313 1.032322  
H -2.408249 -2.583577 2.563941

O 1.196665 -1.006797 3.303653

#### <sup>1</sup>TS8-S

B3LYP/BSI SCF energy: -5894.957302 a.u.

M06/BSII SCF energy in solution: -5893.6433102a.u.

M06/BSII free energy in solution: -5892.631265 a.u.

C -1.106958 2.794825 -0.383428  
N -0.442982 2.030214 0.388309  
O -0.585511 4.031011 -0.628250  
C 0.737493 4.080547 -0.004296  
C 0.692840 2.808238 0.939625  
H 1.594014 2.199220 0.835158  
C 0.439003 3.060591 2.421918  
C 1.240297 2.423104 3.374686  
C -0.615548 3.873448 2.865786  
C 1.008709 2.606550 4.740845  
H 2.029144 1.759776 3.040902  
C -0.847888 4.057867 4.227201  
H -1.254344 4.377224 2.147139  
C -0.033361 3.426284 5.171172  
H 1.641189 2.101293 5.465488  
H -1.665510 4.695111 4.552113  
H -0.215493 3.569954 6.232450  
C -3.053743 1.194462 -0.770599  
N -2.481126 0.098962 -0.441422  
O -4.382763 1.125823 -1.024243  
C -4.853071 -0.196033 -0.580501  
C -3.490654 -0.993650 -0.490265  
H -3.418638 -1.534145 0.451712  
C -3.226649 -1.998832 -1.601124  
C -3.184229 -3.360495 -1.273601

|    |           |           |           |   |           |           |           |
|----|-----------|-----------|-----------|---|-----------|-----------|-----------|
| C  | -3.075332 | -1.619513 | -2.940693 | H | -0.041515 | -2.568750 | -0.050910 |
| C  | -3.017057 | -4.326100 | -2.269484 | H | 0.242453  | -3.140192 | -1.673735 |
| H  | -3.263048 | -3.657483 | -0.232173 | C | 0.492012  | -4.654228 | -0.147678 |
| C  | -2.908054 | -2.581956 | -3.934591 | H | 0.761768  | -4.741142 | 0.907635  |
| H  | -3.078349 | -0.570419 | -3.213227 | H | -0.541029 | -4.996779 | -0.267830 |
| C  | -2.884202 | -3.939312 | -3.603555 | H | 1.142982  | -5.334361 | -0.714693 |
| H  | -2.994081 | -5.378677 | -2.000016 | O | 2.866593  | 0.202775  | 1.106057  |
| H  | -2.795873 | -2.270449 | -4.969192 | C | 3.995964  | 0.518903  | 1.893133  |
| H  | -2.764702 | -4.688691 | -4.381873 | H | 3.952170  | 1.603235  | 2.092052  |
| C  | -2.485295 | 2.591131  | -0.987216 | H | 3.928453  | 0.017429  | 2.872061  |
| C  | -2.453392 | 2.861534  | -2.516473 | C | 5.378160  | 0.214431  | 1.299500  |
| H  | -2.124929 | 3.887110  | -2.699996 | H | 5.467826  | 0.555761  | 0.265047  |
| H  | -1.770041 | 2.166268  | -3.008944 | H | 6.149862  | 0.693944  | 1.917881  |
| H  | -3.457693 | 2.741024  | -2.929917 | H | 5.539409  | -0.867660 | 1.319677  |
| C  | -3.425784 | 3.622626  | -0.297160 | C | -5.869709 | -0.709399 | -1.597733 |
| H  | -4.423373 | 3.563045  | -0.733281 | C | -6.534943 | -1.918975 | -1.352587 |
| H  | -3.504904 | 3.428708  | 0.776347  | C | -6.177067 | 0.004885  | -2.760131 |
| H  | -3.034229 | 4.630623  | -0.444805 | C | -7.472870 | -2.409464 | -2.257806 |
| Ni | -0.535079 | -0.211012 | 0.134902  | H | -6.322703 | -2.479202 | -0.447421 |
| Br | 0.068224  | 0.043738  | -2.454870 | C | -7.124666 | -0.483876 | -3.663104 |
| Si | 2.626356  | -1.316403 | 0.225393  | H | -5.676572 | 0.944775  | -2.959685 |
| H  | 1.108225  | -0.810506 | 0.294214  | C | -7.773686 | -1.692564 | -3.418433 |
| O  | 3.405746  | -2.192435 | 1.451472  | H | -7.972816 | -3.351812 | -2.053161 |
| O  | 1.955347  | -2.756060 | -0.592789 | H | -7.351968 | 0.085960  | -4.559863 |
| C  | 3.774586  | -3.563557 | 1.402049  | H | -8.508896 | -2.072825 | -4.121758 |
| H  | 4.188177  | -3.811938 | 0.417579  | C | -5.550178 | 0.004922  | 0.776518  |
| H  | 2.899362  | -4.201964 | 1.572876  | C | -6.387744 | 1.120472  | 0.935627  |
| C  | 4.808968  | -3.835402 | 2.490855  | C | -5.448643 | -0.914867 | 1.827849  |
| H  | 5.092224  | -4.894711 | 2.498425  | C | -7.093844 | 1.320543  | 2.119139  |
| H  | 5.716434  | -3.237378 | 2.335078  | H | -6.485171 | 1.831971  | 0.122491  |
| H  | 4.411048  | -3.579439 | 3.477581  | C | -6.166748 | -0.716251 | 3.011541  |
| C  | 0.628293  | -3.212967 | -0.641630 | H | -4.795421 | -1.778606 | 1.760561  |

C -6.988176 0.398438 3.163686  
H -7.732589 2.193237 2.223523  
H -6.068619 -1.437487 3.817667  
H -7.540726 0.550502 4.086466  
C 0.895062 5.454166 0.656665  
C 1.939050 5.693623 1.561364  
C 0.050838 6.515920 0.310430  
C 2.124224 6.958390 2.115787  
H 2.602235 4.887220 1.855126  
C 0.236400 7.783115 0.868069  
H -0.755457 6.351649 -0.394423  
C 1.272768 8.010507 1.772097  
H 2.933083 7.118875 2.822653  
H -0.432674 8.592532 0.589644  
H 1.416891 8.995767 2.205732  
C 1.806717 3.982902 -1.107275  
C 1.508298 4.355983 -2.424683  
C 3.132374 3.649929 -0.789577  
C 2.512635 4.419008 -3.394723  
H 0.487201 4.604181 -2.688444  
C 4.140609 3.723774 -1.754327  
H 3.392921 3.329431 0.213341  
C 3.836967 4.118283 -3.061660  
H 2.259382 4.717661 -4.408295  
H 5.159561 3.461282 -1.485325  
H 4.622165 4.185781 -3.809566  
O 3.994500 -1.403521 -3.503331  
P 4.744159 -1.420660 -2.155667  
O 5.134815 -2.850408 -1.689582  
O 5.894194 -0.404745 -2.035393  
O 3.603188 -0.855166 -1.065948  
K 3.026047 0.974303 -2.956604

K 7.299264 -1.985462 -0.636581  
K 2.829616 -3.625278 -2.907404  
C -1.464740 -2.161900 2.229292  
C 0.171381 -1.115726 2.992140  
H 0.118025 -0.673083 3.995741  
H 1.179274 -1.005315 2.592310  
N -0.344120 -2.500389 2.974131  
O -2.439606 -2.846179 1.915943  
C 0.060453 -3.649342 3.650966  
C 1.251812 -3.634143 4.396143  
C -0.714948 -4.824070 3.605502  
C 1.658007 -4.776819 5.083708  
H 1.856957 -2.733784 4.418540  
C -0.290571 -5.955633 4.297951  
H -1.635129 -4.822080 3.034014  
C 0.893317 -5.944406 5.041026  
H 2.581648 -4.751454 5.655970  
H -0.896760 -6.856987 4.257938  
H 1.213869 -6.831675 5.578900  
C -2.001487 0.272558 2.695334  
H -2.950904 0.309842 2.158423  
H -1.583246 1.279760 2.708110  
H -2.234863 -0.002892 3.736124  
C -1.027787 -0.724013 2.063252

**<sup>1</sup>IM5-R**

B3LYP/BSI SCF energy: -2686.266634a.u.

M06/BSII SCF energy in solution: -2685.086705a.u.

M06/BSII free energy in solution: -2684.277698a.u.

C 0.590344 -1.977761 -0.052910  
N 1.079976 -0.908827 -0.572639

|   |           |           |           |    |           |           |           |
|---|-----------|-----------|-----------|----|-----------|-----------|-----------|
| O | 1.395540  | -2.694989 | 0.759506  | C  | -0.788583 | -2.575233 | -0.287930 |
| C | 2.535438  | -1.802262 | 1.076873  | C  | -1.114576 | -3.650592 | 0.771346  |
| C | 2.525837  | -0.891680 | -0.195297 | H  | -0.382402 | -4.457513 | 0.716417  |
| H | 2.811856  | 0.131553  | 0.031982  | H  | -1.087144 | -3.238360 | 1.783024  |
| C | 3.418746  | -1.365685 | -1.334127 | H  | -2.108870 | -4.059195 | 0.586073  |
| C | 4.600242  | -0.657516 | -1.592903 | C  | -0.824333 | -3.209347 | -1.709862 |
| C | 3.121010  | -2.486014 | -2.120877 | H  | -1.827610 | -3.591223 | -1.917070 |
| C | 5.469409  | -1.067909 | -2.604545 | H  | -0.558864 | -2.471440 | -2.469854 |
| H | 4.813545  | 0.238716  | -1.018965 | H  | -0.119591 | -4.044677 | -1.760561 |
| C | 3.986572  | -2.894479 | -3.135745 | Ni | -0.087373 | 0.676366  | -1.290782 |
| H | 2.206067  | -3.044201 | -1.951475 | H  | -0.999912 | 1.682811  | -1.775993 |
| C | 5.166267  | -2.188469 | -3.378735 | C  | -5.087659 | -0.638517 | 0.709213  |
| H | 6.377653  | -0.503012 | -2.794700 | C  | -6.207914 | 0.155620  | 0.424647  |
| H | 3.738544  | -3.764297 | -3.737935 | C  | -5.009754 | -1.278827 | 1.950387  |
| H | 5.838922  | -2.505405 | -4.170730 | C  | -7.224649 | 0.311143  | 1.365130  |
| C | -1.830874 | -1.479767 | -0.253237 | H  | -6.289404 | 0.646231  | -0.540747 |
| N | -1.657129 | -0.241597 | -0.542061 | C  | -6.033658 | -1.129249 | 2.888185  |
| O | -3.082109 | -1.871325 | 0.055855  | H  | -4.150535 | -1.897705 | 2.179728  |
| C | -3.974852 | -0.745300 | -0.318630 | C  | -7.141966 | -0.333150 | 2.601301  |
| C | -2.945755 | 0.451496  | -0.313456 | H  | -8.084259 | 0.931649  | 1.128943  |
| H | -3.142686 | 1.110139  | -1.156501 | H  | -5.960790 | -1.637706 | 3.845316  |
| C | -2.897833 | 1.316975  | 0.936106  | H  | -7.936602 | -0.216872 | 3.332483  |
| C | -3.624746 | 2.514008  | 0.958962  | C  | -4.492485 | -1.103564 | -1.719772 |
| C | -2.147820 | 0.964471  | 2.063864  | C  | -5.495325 | -2.081298 | -1.832916 |
| C | -3.616913 | 3.333298  | 2.087225  | C  | -3.942711 | -0.573478 | -2.895772 |
| H | -4.196256 | 2.810828  | 0.083178  | C  | -5.947660 | -2.503581 | -3.080617 |
| C | -2.133061 | 1.785354  | 3.192249  | H  | -5.925272 | -2.509821 | -0.933495 |
| H | -1.549313 | 0.059825  | 2.060070  | C  | -4.400351 | -0.995306 | -4.147682 |
| C | -2.870094 | 2.969991  | 3.209224  | H  | -3.146028 | 0.161536  | -2.859517 |
| H | -4.183873 | 4.259825  | 2.084880  | C  | -5.403815 | -1.957090 | -4.245695 |
| H | -1.530906 | 1.500475  | 4.049840  | H  | -6.727542 | -3.257156 | -3.142823 |
| H | -2.853865 | 3.611847  | 4.085382  | H  | -3.963946 | -0.566659 | -5.045145 |

H -5.759452 -2.280296 -5.219803  
C 3.780637 -2.648584 1.288380  
C 4.932633 -2.042408 1.809019  
C 3.815951 -4.010633 0.972256  
C 6.098238 -2.782056 1.998174  
H 4.914132 -0.989818 2.075038  
C 4.981759 -4.752942 1.173335  
H 2.930534 -4.490071 0.572157  
C 6.126765 -4.142519 1.683346  
H 6.982962 -2.295644 2.398749  
H 4.991306 -5.811213 0.927758  
H 7.033258 -4.720663 1.837505  
C 2.145773 -1.067496 2.370949  
C 1.712793 -1.848162 3.456659  
C 2.221378 0.321876 2.526697  
C 1.354733 -1.256522 4.664650  
H 1.662772 -2.927311 3.348426  
C 1.866567 0.912814 3.745329  
H 2.547255 0.965951 1.716704  
C 1.432604 0.131829 4.814135  
H 1.023787 -1.877839 5.492238  
H 1.929991 1.992236 3.846920  
H 1.162780 0.596221 5.758601  
C 2.219393 2.467196 -1.113194  
N 1.792030 3.761580 -1.352476  
C 2.106670 5.006356 -0.810187  
C 3.077068 5.129277 0.202710  
C 1.453857 6.156063 -1.285402  
C 3.374022 6.386801 0.721383  
H 3.579727 4.237555 0.556098  
C 1.765062 7.406311 -0.753419  
H 0.706580 6.064235 -2.067396

C 2.724949 7.532578 0.252170  
H 4.125478 6.471685 1.502186  
H 1.251727 8.286934 -1.130427  
H 2.965326 8.508521 0.663299  
C 1.879723 1.184882 -3.347119  
H 1.112306 1.003055 -4.107952  
H 2.333743 0.223789 -3.103178  
H 2.659918 1.809944 -3.811459  
C 1.251530 1.863440 -2.122892  
C 0.845491 3.359104 -2.401715  
H -0.186870 3.634395 -2.181074  
H 1.135063 3.739608 -3.391426  
O 3.090891 2.081473 -0.330141

#### <sup>4</sup>IM5-S

B3LYP/BSI SCF energy: -2686.268376a.u.

M06/BSII SCF energy in solution: -2685.0886123a.u.

M06/BSII free energy in solution: -2684.278731a.u.

C 2.060087 -1.016004 -0.630596  
N 1.823350 0.209966 -0.328978  
O 3.278633 -1.500191 -0.322737  
C 3.912289 -0.503025 0.574819  
C 3.075068 0.789647 0.216308  
H 2.839287 1.338894 1.127158  
C 3.720652 1.767938 -0.750399  
C 4.202336 2.987575 -0.263078  
C 3.860989 1.485798 -2.114246  
C 4.816446 3.906390 -1.114922  
H 4.085253 3.226462 0.791033  
C 4.471522 2.402164 -2.969206  
H 3.480139 0.553010 -2.517485

|    |           |           |           |   |           |           |           |
|----|-----------|-----------|-----------|---|-----------|-----------|-----------|
| C  | 4.952839  | 3.615425  | -2.472346 | C | -3.304530 | -3.207131 | 0.144733  |
| H  | 5.178542  | 4.850860  | -0.719036 | C | -4.679565 | -2.976114 | 0.293257  |
| H  | 4.567863  | 2.170545  | -4.026183 | C | -2.728090 | -4.306228 | 0.788975  |
| H  | 5.424532  | 4.330292  | -3.140317 | C | -5.458240 | -3.821226 | 1.080409  |
| C  | -0.306061 | -1.698543 | -0.877723 | H | -5.142650 | -2.136245 | -0.216323 |
| N  | -0.819288 | -0.568204 | -0.554226 | C | -3.512957 | -5.158669 | 1.569691  |
| O  | -1.112709 | -2.778014 | -0.847499 | H | -1.667375 | -4.497445 | 0.676442  |
| C  | -2.492998 | -2.252781 | -0.717425 | C | -4.877702 | -4.918662 | 1.721161  |
| C  | -2.206519 | -0.841210 | -0.091467 | H | -6.521150 | -3.625454 | 1.188461  |
| H  | -2.864880 | -0.088438 | -0.513937 | H | -3.051518 | -6.011381 | 2.060001  |
| C  | -2.302285 | -0.734711 | 1.424279  | H | -5.486242 | -5.581180 | 2.329854  |
| C  | -3.318310 | 0.051055  | 1.982894  | C | -3.052106 | -2.208463 | -2.150352 |
| C  | -1.412562 | -1.394630 | 2.283139  | C | -2.986494 | -3.393908 | -2.903338 |
| C  | -3.451414 | 0.165098  | 3.368328  | C | -3.623062 | -1.070274 | -2.732420 |
| H  | -3.990117 | 0.592461  | 1.324038  | C | -3.468366 | -3.440340 | -4.208011 |
| C  | -1.548485 | -1.286809 | 3.666799  | H | -2.556326 | -4.284908 | -2.456118 |
| H  | -0.608389 | -2.000767 | 1.877042  | C | -4.113800 | -1.124635 | -4.043012 |
| C  | -2.569904 | -0.506758 | 4.214756  | H | -3.696126 | -0.130475 | -2.194119 |
| H  | -4.240546 | 0.786268  | 3.782261  | C | -4.037251 | -2.300574 | -4.784538 |
| H  | -0.857467 | -1.816933 | 4.316374  | H | -3.407310 | -4.366591 | -4.772664 |
| H  | -2.673061 | -0.420779 | 5.292886  | H | -4.553832 | -0.231991 | -4.478237 |
| C  | 1.114951  | -1.964530 | -1.344353 | H | -4.418602 | -2.334023 | -5.801223 |
| C  | 1.511515  | -3.431708 | -1.074628 | C | 5.393783  | -0.421491 | 0.247115  |
| H  | 2.526187  | -3.611556 | -1.433324 | C | 6.227536  | 0.356822  | 1.063182  |
| H  | 1.482826  | -3.667785 | -0.007933 | C | 5.951471  | -1.091035 | -0.846277 |
| H  | 0.825711  | -4.100147 | -1.596136 | C | 7.587695  | 0.470271  | 0.784522  |
| C  | 1.174796  | -1.674366 | -2.873168 | H | 5.811793  | 0.868800  | 1.926201  |
| H  | 0.458383  | -2.314807 | -3.395073 | C | 7.317281  | -0.982380 | -1.120324 |
| H  | 0.929101  | -0.630018 | -3.078156 | H | 5.318832  | -1.701380 | -1.479756 |
| H  | 2.177522  | -1.891754 | -3.253589 | C | 8.138941  | -0.201046 | -0.309651 |
| Ni | 0.168211  | 1.214779  | -0.641678 | H | 8.218041  | 1.080014  | 1.425220  |
| H  | 0.962513  | 2.421520  | -0.678329 | H | 7.735848  | -1.512797 | -1.970904 |



H 9.200170 -0.116743 -0.524528  
C 3.660067 -1.022697 1.999211  
C 4.493308 -2.031428 2.510502  
C 2.575553 -0.597319 2.780507  
C 4.263923 -2.582734 3.769255  
H 5.331654 -2.382765 1.918362  
C 2.349268 -1.146582 4.045536  
H 1.884043 0.155025 2.418488  
C 3.192535 -2.136942 4.546245  
H 4.925880 -3.357953 4.144401  
H 1.507158 -0.792849 4.632475  
H 3.017384 -2.559085 5.531620  
C -2.653648 2.475952 -0.756725  
C -1.173016 3.919316 -0.526415  
H -1.062495 4.775294 -1.206041  
H -0.485920 4.020516 0.316248  
N -2.570086 3.700352 -0.117483  
O -3.636582 1.743543 -0.895845  
C -3.462224 4.482068 0.614597  
C -3.021575 5.687233 1.186536  
C -4.802248 4.084049 0.783664  
C -3.905164 6.475614 1.921765  
H -1.990150 5.998386 1.053342  
C -5.669561 4.884510 1.522790  
H -5.136221 3.161852 0.324303  
C -5.232734 6.081378 2.097794  
H -3.550256 7.404976 2.359294  
H -6.702521 4.569616 1.646567  
H -5.918036 6.698734 2.670908  
C -1.114761 2.563390 -2.757577  
H -1.410648 1.605826 -3.200009  
H -0.092727 2.779698 -3.081852

H -1.774433 3.335737 -3.187141  
C -1.207909 2.511621 -1.221258

**<sup>1</sup>TS9-R**

B3LYP/BSI SCF energy: -2922.092849a.u.

M06/BSII SCF energy in solution: -2920.785776a.u.

M06/BSII free energy in solution: -2919.820852a.u.

C 1.479386 -1.786115 -0.466884  
N 1.577009 -0.568054 -0.073908  
O 2.562103 -2.568515 -0.268137  
C 3.548358 -1.818660 0.506962  
C 2.951384 -0.346436 0.439043  
C -0.992913 -1.926249 -0.845134  
N -1.375254 -1.809811 0.358619  
O -1.886245 -1.687480 -1.842985  
C -3.156943 -1.310567 -1.210572  
C -2.763879 -1.322627 0.344842  
Ni 0.386742 0.999010 -0.239875  
C 0.368944 -2.449652 -1.271236  
C 0.660483 -2.161077 -2.765186  
H 1.636018 -2.575389 -3.036274  
H 0.655396 -1.086740 -2.961400  
H -0.101522 -2.632131 -3.389309  
C 0.359074 -3.979879 -1.024107  
H -0.461168 -4.428053 -1.591943  
H 0.206196 -4.199801 0.034424  
H 1.295538 -4.434677 -1.354069  
C -4.216298 -2.330939 -1.642396  
C -5.562629 -2.121704 -1.308862  
C -3.880304 -3.473095 -2.377754  
C -6.541714 -3.036836 -1.687553

|   |           |           |           |   |           |           |           |
|---|-----------|-----------|-----------|---|-----------|-----------|-----------|
| H | -5.847756 | -1.238250 | -0.747538 | C | 6.314008  | -2.983089 | -1.890761 |
| C | -4.863488 | -4.388892 | -2.762359 | H | 4.183546  | -3.248201 | -1.762482 |
| H | -2.848317 | -3.640116 | -2.662405 | C | 7.316129  | -1.646523 | -0.156526 |
| C | -6.196899 | -4.176898 | -2.417580 | H | 5.985869  | -0.878731 | 1.336124  |
| H | -7.577325 | -2.856998 | -1.413421 | C | 7.447737  | -2.409001 | -1.319124 |
| H | -4.581303 | -5.267275 | -3.336627 | H | 6.401604  | -3.584870 | -2.790995 |
| H | -6.961295 | -4.888459 | -2.716455 | H | 8.191120  | -1.195853 | 0.302769  |
| C | -3.534114 | 0.074982  | -1.744035 | H | 8.424706  | -2.556008 | -1.770096 |
| C | -4.183215 | 1.028833  | -0.951751 | C | 0.078338  | 1.250879  | 1.824165  |
| C | -3.286244 | 0.376169  | -3.092363 | C | -1.275078 | 1.848291  | 2.124461  |
| C | -4.574384 | 2.256356  | -1.494519 | N | -0.732182 | 3.037611  | 2.621621  |
| H | -4.371026 | 0.838781  | 0.098501  | C | -1.263541 | 4.236698  | 3.094955  |
| C | -3.666825 | 1.604314  | -3.630127 | C | -2.657608 | 4.421698  | 3.172556  |
| H | -2.787699 | -0.357016 | -3.716993 | C | -0.405202 | 5.271056  | 3.504025  |
| C | -4.316625 | 2.550426  | -2.832518 | C | -3.165538 | 5.627492  | 3.648142  |
| H | -5.070761 | 2.984855  | -0.860127 | H | -3.309475 | 3.613419  | 2.863813  |
| H | -3.461151 | 1.820430  | -4.674973 | C | -0.933493 | 6.471529  | 3.977031  |
| H | -4.616417 | 3.506985  | -3.250959 | H | 0.670060  | 5.129160  | 3.452428  |
| C | 3.552679  | -2.394298 | 1.931483  | C | -2.314251 | 6.660370  | 4.052411  |
| C | 3.952845  | -1.628318 | 3.034147  | H | -4.242802 | 5.760379  | 3.705342  |
| C | 3.220817  | -3.740290 | 2.136070  | H | -0.257430 | 7.262950  | 4.289802  |
| C | 4.009235  | -2.189741 | 4.311189  | H | -2.721771 | 7.596289  | 4.422658  |
| H | 4.221381  | -0.583040 | 2.913384  | C | 0.318424  | 0.004035  | 2.687555  |
| C | 3.270426  | -4.298917 | 3.412585  | H | 1.359740  | -0.328752 | 2.674671  |
| H | 2.915171  | -4.348133 | 1.292501  | H | -0.290614 | -0.830220 | 2.333834  |
| C | 3.664970  | -3.526626 | 4.506048  | H | 0.064960  | 0.185813  | 3.744896  |
| H | 4.315194  | -1.575371 | 5.152852  | C | -0.701292 | 2.714547  | -0.697869 |
| H | 2.998645  | -5.341328 | 3.551432  | H | -0.934141 | 3.204996  | 0.235811  |
| H | 3.700863  | -3.961715 | 5.500308  | H | -1.548274 | 2.419308  | -1.312619 |
| C | 4.916343  | -2.026459 | -0.149465 | C | 0.552103  | 2.845317  | -1.269402 |
| C | 5.056862  | -2.793092 | -1.311650 | H | 0.450038  | 0.664816  | -1.663050 |
| C | 6.064087  | -1.463008 | 0.425788  | H | 1.336188  | 3.309786  | -0.666557 |

C 0.827565 2.862526 -2.755485  
H 0.029181 2.328645 -3.282275  
H 1.768355 2.345515 -2.971911  
C 0.919348 4.310956 -3.277341  
H -0.025099 4.832146 -3.070529  
H 1.697532 4.852522 -2.720656  
C 1.228887 4.385188 -4.778185  
H 0.455519 3.837524 -5.333713  
H 2.174240 3.862102 -4.977750  
C 1.317373 5.820893 -5.305367  
H 0.374904 6.358298 -5.150446  
H 1.539256 5.841166 -6.377555  
H 2.105276 6.383764 -4.791745  
C -3.640819 -2.106094 1.304773  
C -3.696837 -3.506349 1.287448  
C -4.383515 -1.413585 2.269142  
C -4.499758 -4.196470 2.193568  
H -3.109814 -4.058468 0.560354  
C -5.192287 -2.103601 3.175617  
H -4.294892 -0.332485 2.330765  
C -5.256848 -3.496228 3.136809  
H -4.535019 -5.282192 2.165012  
H -5.760185 -1.551292 3.919336  
H -5.883271 -4.035073 3.842480  
C 3.710433 0.673021 -0.392723  
C 4.305366 1.767737 0.245028  
C 3.850615 0.545007 -1.781111  
C 5.033265 2.712968 -0.481964  
H 4.196109 1.885213 1.320712  
C 4.579718 1.483469 -2.509203  
H 3.388109 -0.290520 -2.295971  
C 5.174532 2.570467 -1.862016

H 5.486820 3.556439 0.030592  
H 4.684985 1.366747 -3.584024  
H 5.742202 3.300444 -2.431697  
H 2.864173 0.051389 1.448670  
H -2.729967 -0.292639 0.708917  
C 0.652068 2.577614 2.439237  
H 1.190338 2.462248 3.390485  
H 1.236337 3.223725 1.771382  
O -2.451910 1.517782 2.025218

### <sup>1</sup>TS9-S

B3LYP/BSI SCF energy: -2922.09832a.u.

M06/BSII SCF energy in solution: -2920.789465a.u.

M06/BSII free energy in solution: -2919.826655a.u.

C -0.743477 -2.040961 -0.547013  
N -1.116596 -0.890960 -0.134789  
O -1.727644 -2.928212 -0.842552  
C -3.002185 -2.190089 -0.840207  
C -2.600079 -0.885215 -0.046218  
C 1.769227 -1.636338 -0.460059  
N 1.727476 -0.364145 -0.441957  
O 2.983709 -2.227355 -0.275304  
C 3.925193 -1.181038 0.121600  
C 3.094438 0.137160 -0.220953  
Ni -0.099163 0.774629 0.380189  
C 0.648787 -2.623126 -0.739448  
C 0.783382 -3.847268 0.206538  
H -0.020842 -4.557128 0.006079  
H 0.731175 -3.541540 1.255529  
H 1.740527 -4.343517 0.039710  
C 0.793533 -3.088602 -2.216929

|   |           |           |           |   |           |           |           |
|---|-----------|-----------|-----------|---|-----------|-----------|-----------|
| H | 1.786408  | -3.518324 | -2.371910 | C | -4.137568 | -1.677940 | -5.009488 |
| H | 0.659073  | -2.248567 | -2.903134 | H | -4.651198 | 0.347132  | -4.482737 |
| H | 0.042095  | -3.846573 | -2.444796 | H | -3.527525 | -3.739053 | -5.213275 |
| C | 5.223163  | -1.387772 | -0.661010 | H | -4.429983 | -1.572382 | -6.050322 |
| C | 6.343132  | -0.590138 | -0.386387 | C | -4.069032 | -3.065452 | -0.188551 |
| C | 5.327783  | -2.370308 | -1.652035 | C | -3.775135 | -4.324333 | 0.344524  |
| C | 7.531044  | -0.762255 | -1.093691 | C | -5.392102 | -2.603306 | -0.142258 |
| H | 6.294156  | 0.168390  | 0.387707  | C | -4.782987 | -5.103031 | 0.919689  |
| C | 6.521324  | -2.547114 | -2.355945 | H | -2.758855 | -4.698498 | 0.307737  |
| H | 4.476301  | -3.003698 | -1.868643 | C | -6.393751 | -3.376247 | 0.439751  |
| C | 7.626679  | -1.743527 | -2.082682 | H | -5.641081 | -1.636562 | -0.569024 |
| H | 8.384930  | -0.130114 | -0.867716 | C | -6.093576 | -4.632164 | 0.973187  |
| H | 6.582497  | -3.318500 | -3.118575 | H | -4.537640 | -6.080619 | 1.325539  |
| H | 8.554317  | -1.880592 | -2.630618 | H | -7.411742 | -2.998819 | 0.471578  |
| C | 4.176761  | -1.339896 | 1.629922  | H | -6.875913 | -5.237377 | 1.421925  |
| C | 4.513454  | -0.252127 | 2.446154  | C | -0.588314 | 1.770863  | -1.420950 |
| C | 4.137428  | -2.617862 | 2.205737  | C | -1.897344 | 2.458391  | -1.195383 |
| C | 4.791415  | -0.433547 | 3.803015  | C | -0.017067 | 3.205093  | -1.673829 |
| H | 4.565306  | 0.751535  | 2.035820  | H | 0.204467  | 3.421132  | -2.728022 |
| C | 4.408379  | -2.798921 | 3.561242  | H | 0.818112  | 3.549961  | -1.057842 |
| H | 3.888701  | -3.471923 | 1.586371  | N | -1.332027 | 3.735644  | -1.269104 |
| C | 4.736157  | -1.707085 | 4.367212  | O | -3.074831 | 2.137823  | -1.009390 |
| H | 5.047031  | 0.425751  | 4.416205  | C | -1.826630 | 5.032508  | -1.159258 |
| H | 4.365623  | -3.797247 | 3.987478  | C | -0.978590 | 6.129145  | -1.391281 |
| H | 4.947095  | -1.848169 | 5.423117  | C | -3.174760 | 5.260636  | -0.819998 |
| C | -3.375784 | -1.945016 | -2.313031 | C | -1.470253 | 7.428864  | -1.280205 |
| C | -3.886252 | -0.731577 | -2.789668 | H | 0.059593  | 5.956950  | -1.658564 |
| C | -3.260148 | -3.024740 | -3.204522 | C | -3.646684 | 6.566130  | -0.714669 |
| C | -4.264650 | -0.604957 | -4.130965 | H | -3.823070 | 4.408421  | -0.655693 |
| H | -3.971127 | 0.140242  | -2.149667 | C | -2.804582 | 7.659081  | -0.940942 |
| C | -3.629356 | -2.892367 | -4.540048 | H | -0.802157 | 8.266686  | -1.462169 |
| H | -2.881225 | -3.975101 | -2.842414 | H | -4.688903 | 6.730911  | -0.453423 |

H -3.183579 8.673147 -0.855959  
C -0.499871 0.855609 -2.640991  
H -1.165266 -0.005444 -2.560253  
H 0.520192 0.479069 -2.767113  
H -0.773121 1.379571 -3.571368  
C 0.412652 2.463336 1.336855  
H 0.009844 3.297597 0.778745  
H 1.479018 2.516458 1.562058  
C -0.425480 1.741180 2.200752  
H 0.212407 0.013259 1.575976  
H -1.497357 1.930400 2.128377  
C 0.006176 1.233149 3.564616  
H 1.071469 0.970820 3.542902  
H -0.544939 0.320914 3.819468  
C -0.241761 2.290267 4.657218  
H 0.312121 3.206211 4.409365  
H -1.305481 2.566963 4.659630  
C 0.159377 1.811089 6.058424  
H 1.220057 1.524031 6.052560  
H -0.400123 0.897322 6.300800  
C -0.079471 2.861582 7.147853  
H 0.494605 3.774240 6.950683  
H 0.214672 2.490477 8.135487  
H -1.137183 3.143995 7.200058  
C 3.572471 0.989127 -1.383072  
C 3.495116 0.542048 -2.708501  
C 4.098572 2.261408 -1.133409  
C 3.939494 1.346836 -3.756258  
H 3.081889 -0.438302 -2.923649  
C 4.545709 3.070676 -2.179960  
H 4.151530 2.627993 -0.110788  
C 4.467963 2.613546 -3.495303

H 3.871028 0.986199 -4.778574  
H 4.947275 4.057179 -1.966570  
H 4.811323 3.240515 -4.313059  
C -3.065600 -0.779457 1.397428  
C -3.932761 0.262097 1.749939  
C -2.653225 -1.682190 2.386532  
C -4.391425 0.390234 3.063572  
H -4.221845 0.987252 0.994417  
C -3.110297 -1.555546 3.697553  
H -1.973683 -2.490306 2.133501  
C -3.984238 -0.519505 4.039568  
H -5.061884 1.204983 3.322498  
H -2.786807 -2.266635 4.452682  
H -4.340765 -0.422300 5.061222  
H -2.943948 0.010776 -0.560765  
H 3.060888 0.775165 0.662461

**<sup>1</sup>IM6-R**

B3LYP/BSI SCF energy: -2922.147394a.u.

M06/BSII SCF energy in solution: -2920.837461a.u.

M06/BSII free energy in solution: -2919.86781a.u.

C 0.502206 -1.072607 -1.474057  
N 1.005010 -0.714036 -0.345912  
O 1.134558 -2.059073 -2.146361  
C 2.064335 -2.677763 -1.188179  
C 2.268185 -1.475755 -0.184182  
C -1.766582 -0.267170 -1.079121  
N -1.561464 0.337564 0.028219  
O -2.988790 -0.764565 -1.318441  
C -3.835829 -0.491660 -0.132223  
C -2.834926 0.368020 0.781457

|    |           |           |           |   |           |           |           |
|----|-----------|-----------|-----------|---|-----------|-----------|-----------|
| Ni | 0.277238  | 0.878718  | 0.783925  | C | 3.301628  | -3.139406 | -1.949595 |
| C  | -0.718584 | -0.473077 | -2.159444 | C | 4.165960  | -4.083562 | -1.379210 |
| C  | -1.240773 | -1.394191 | -3.278367 | C | 3.608970  | -2.620310 | -3.213109 |
| H  | -0.475808 | -1.513409 | -4.047963 | C | 5.317372  | -4.490428 | -2.052347 |
| H  | -1.506496 | -2.384418 | -2.903099 | H | 3.934724  | -4.514449 | -0.410456 |
| H  | -2.130208 | -0.951501 | -3.730154 | C | 4.755965  | -3.036491 | -3.890108 |
| C  | -0.333233 | 0.909502  | -2.758213 | H | 2.945965  | -1.895390 | -3.669264 |
| H  | -1.212593 | 1.370162  | -3.216441 | C | 5.616260  | -3.970053 | -3.312298 |
| H  | 0.046790  | 1.581611  | -1.986800 | H | 5.975596  | -5.222572 | -1.593567 |
| H  | 0.429094  | 0.779627  | -3.532638 | H | 4.975080  | -2.627430 | -4.872222 |
| C  | -5.045528 | 0.285066  | -0.670420 | H | 6.508901  | -4.292762 | -3.840101 |
| C  | -6.204143 | -0.403071 | -1.065245 | C | 1.314679  | -3.868364 | -0.565283 |
| C  | -4.984377 | 1.669919  | -0.892301 | C | 0.487941  | -4.644564 | -1.392935 |
| C  | -7.283240 | 0.273689  | -1.632809 | C | 1.465469  | -4.251161 | 0.773049  |
| H  | -6.266596 | -1.476262 | -0.927244 | C | -0.183084 | -5.757952 | -0.891105 |
| C  | -6.068128 | 2.344722  | -1.458166 | H | 0.374687  | -4.370407 | -2.436030 |
| H  | -4.096334 | 2.241130  | -0.644948 | C | 0.795606  | -5.370643 | 1.276011  |
| C  | -7.222806 | 1.654282  | -1.825081 | H | 2.109319  | -3.690835 | 1.442960  |
| H  | -8.170358 | -0.281535 | -1.924444 | C | -0.033558 | -6.125185 | 0.448661  |
| H  | -6.000923 | 3.417984  | -1.611663 | H | -0.817280 | -6.344127 | -1.550150 |
| H  | -8.064557 | 2.184635  | -2.261606 | H | 0.924953  | -5.646301 | 2.318460  |
| C  | -4.209817 | -1.836497 | 0.488670  | H | -0.553584 | -6.994307 | 0.840560  |
| C  | -5.165857 | -1.883173 | 1.515669  | C | -0.136975 | 2.778900  | 1.192598  |
| C  | -3.594744 | -3.029104 | 0.094743  | C | -1.111534 | 3.353963  | 0.180137  |
| C  | -5.489830 | -3.088165 | 2.134174  | C | 0.916202  | 3.721037  | 0.498958  |
| H  | -5.658115 | -0.970029 | 1.832933  | H | 1.245076  | 4.579448  | 1.100564  |
| C  | -3.919178 | -4.238531 | 0.715672  | H | 1.783587  | 3.238334  | 0.042058  |
| H  | -2.863094 | -3.020490 | -0.703878 | N | -0.128768 | 4.092723  | -0.468953 |
| C  | -4.865937 | -4.273632 | 1.737229  | O | -2.317309 | 3.305474  | -0.044216 |
| H  | -6.230402 | -3.100225 | 2.928638  | C | -0.120488 | 4.964888  | -1.555039 |
| H  | -3.422617 | -5.150230 | 0.396026  | C | 1.074102  | 5.606045  | -1.925832 |
| H  | -5.118461 | -5.213205 | 2.220301  | C | -1.295831 | 5.211952  | -2.290985 |

C 1.091630 6.474011 -3.016535  
H 1.979955 5.424489 -1.355642  
C -1.257647 6.082111 -3.377329  
H -2.214621 4.725398 -1.987394  
C -0.070066 6.718070 -3.751123  
H 2.022348 6.963743 -3.290594  
H -2.170715 6.268149 -3.936947  
H -0.052175 7.396268 -4.598956  
C -0.496629 3.134924 2.635476  
H -1.403652 2.611082 2.950260  
H 0.299374 2.852100 3.328969  
H -0.677870 4.214528 2.761114  
C 1.715886 0.867634 2.085636  
H 2.152545 -0.140270 2.016231  
H 1.136731 0.878491 3.023246  
C 2.863352 1.872093 2.193196  
H 3.418732 1.915764 1.246626  
H 2.469664 2.881820 2.364465  
C 3.862964 1.561145 3.323417  
H 3.325431 1.524465 4.282440  
H 4.280535 0.555359 3.170228  
C 5.010918 2.573956 3.421089  
H 4.594468 3.581417 3.567439  
H 5.546042 2.605090 2.460731  
C 6.011213 2.276729 4.545968  
H 5.476978 2.242397 5.505492  
H 6.432383 1.272174 4.399652  
C 7.149083 3.299175 4.632945  
H 6.760778 4.307999 4.814793  
H 7.845696 3.060256 5.443845  
H 7.723875 3.332854 3.699941  
C -2.680970 -0.068915 2.224758

C -3.428098 0.586522 3.211657  
C -1.817564 -1.102934 2.608238  
C -3.328990 0.209774 4.552317  
H -4.088108 1.402597 2.927420  
C -1.711208 -1.475705 3.948098  
H -1.224219 -1.615320 1.858226  
C -2.467984 -0.823254 4.924127  
H -3.914708 0.730997 5.304249  
H -1.034628 -2.277466 4.230348  
H -2.381899 -1.114428 5.967153  
H -3.155018 1.409729 0.790538  
H 2.322346 -1.845746 0.837697  
C 3.499218 -0.620051 -0.439850  
C 4.673875 -0.890609 0.272573  
C 3.511150 0.408872 -1.388191  
C 5.838052 -0.159234 0.037398  
H 4.678234 -1.678144 1.021954  
C 4.673513 1.144531 -1.624582  
H 2.606494 0.653035 -1.934022  
C 5.841414 0.861663 -0.914650  
H 6.738531 -0.382901 0.601927  
H 4.663354 1.942453 -2.361676  
H 6.744904 1.436176 -1.096868

<sup>4</sup>IM6-R

B3LYP-D3BJ/BSI SCF energy in solution:

-2922.572805a.u.

M06/BSII SCF energy in solution: -2920.846321a.u.

M06/BSII free energy in solution: -2919.86801a.u.

C 0.456529 -0.691879 -1.555061  
N 0.931264 -0.475927 -0.378004

|    |           |           |           |   |           |           |           |
|----|-----------|-----------|-----------|---|-----------|-----------|-----------|
| O  | 1.092074  | -1.605733 | -2.310859 | C | -5.060011 | -3.378928 | 2.203529  |
| C  | 1.957547  | -2.354572 | -1.379639 | H | -5.254518 | -1.240583 | 2.115809  |
| C  | 2.175002  | -1.266801 | -0.271625 | C | -3.708297 | -4.386412 | 0.478608  |
| C  | -1.783348 | -0.006051 | -1.056244 | H | -2.828982 | -3.031705 | -0.942785 |
| N  | -1.592014 | 0.548538  | 0.079903  | C | -4.501637 | -4.518328 | 1.616658  |
| O  | -2.910487 | -0.704718 | -1.235824 | H | -5.678445 | -3.468891 | 3.091565  |
| C  | -3.712017 | -0.589529 | 0.009564  | H | -3.268330 | -5.262914 | 0.014911  |
| C  | -2.718419 | 0.206814  | 0.967030  | H | -4.684906 | -5.498958 | 2.045790  |
| Ni | 0.222965  | 0.941780  | 0.908881  | C | 3.213146  | -2.778311 | -2.110504 |
| C  | -0.753720 | -0.004122 | -2.165641 | C | 4.001129  | -3.814653 | -1.597665 |
| C  | -1.257120 | -0.742797 | -3.412687 | C | 3.646168  | -2.087848 | -3.247880 |
| H  | -0.485172 | -0.735859 | -4.184295 | C | 5.211152  | -4.147285 | -2.206638 |
| H  | -1.519532 | -1.779122 | -3.193305 | H | 3.672075  | -4.361509 | -0.720767 |
| H  | -2.142708 | -0.236266 | -3.802315 | C | 4.851269  | -2.428805 | -3.861242 |
| C  | -0.376802 | 1.457572  | -2.514785 | H | 3.041926  | -1.283557 | -3.648593 |
| H  | -1.258080 | 1.985944  | -2.886430 | C | 5.640242  | -3.455932 | -3.340726 |
| H  | 0.000143  | 1.981773  | -1.636119 | H | 5.815201  | -4.950664 | -1.795697 |
| H  | 0.389518  | 1.463969  | -3.294593 | H | 5.174399  | -1.886647 | -4.744931 |
| C  | -4.949870 | 0.205922  | -0.392402 | H | 6.580457  | -3.717264 | -3.816983 |
| C  | -6.144549 | -0.446314 | -0.723764 | C | 1.125704  | -3.537788 | -0.882484 |
| C  | -4.874050 | 1.598056  | -0.544117 | C | 0.238413  | -4.159779 | -1.772241 |
| C  | -7.249124 | 0.278012  | -1.173631 | C | 1.247842  | -4.045817 | 0.415387  |
| H  | -6.216340 | -1.523544 | -0.629480 | C | -0.521494 | -5.255406 | -1.366432 |
| C  | -5.978906 | 2.319730  | -0.996020 | H | 0.143593  | -3.780798 | -2.783366 |
| H  | -3.962244 | 2.133402  | -0.302961 | C | 0.487334  | -5.145671 | 0.821033  |
| C  | -7.171574 | 1.664709  | -1.308430 | H | 1.938259  | -3.599356 | 1.121947  |
| H  | -8.168969 | -0.244809 | -1.418960 | C | -0.400969 | -5.751538 | -0.065930 |
| H  | -5.905756 | 3.398655  | -1.099102 | H | -1.206185 | -5.722654 | -2.067915 |
| H  | -8.032153 | 2.229716  | -1.654643 | H | 0.592953  | -5.524584 | 1.832872  |
| C  | -4.016574 | -1.984483 | 0.514549  | H | -0.991780 | -6.605204 | 0.250987  |
| C  | -4.822295 | -2.122350 | 1.654093  | C | -0.216266 | 2.750438  | 1.616798  |
| C  | -3.463239 | -3.124737 | -0.069938 | C | -1.375399 | 3.326387  | 0.847472  |



|   |           |           |           |   |           |           |           |
|---|-----------|-----------|-----------|---|-----------|-----------|-----------|
| C | 0.670909  | 3.730236  | 0.762595  | C | 6.426979  | 1.959840  | 3.801422  |
| H | 1.073819  | 4.596040  | 1.303789  | H | 6.118968  | 1.934799  | 4.855721  |
| H | 1.454384  | 3.280088  | 0.148020  | H | 6.710159  | 0.930152  | 3.542247  |
| N | -0.547933 | 4.069796  | 0.009007  | C | 7.641762  | 2.876359  | 3.643575  |
| O | -2.602573 | 3.292935  | 0.897745  | H | 7.396427  | 3.909273  | 3.917884  |
| C | -0.739417 | 4.765296  | -1.175190 | H | 8.477084  | 2.554528  | 4.275500  |
| C | 0.362183  | 5.333030  | -1.837664 | H | 7.995062  | 2.887486  | 2.605431  |
| C | -2.024788 | 4.882093  | -1.739392 | C | -2.202949 | -0.533943 | 2.180967  |
| C | 0.178510  | 5.997938  | -3.049137 | C | -2.611176 | -0.136353 | 3.455985  |
| H | 1.352489  | 5.249123  | -1.401611 | C | -1.313487 | -1.610433 | 2.052456  |
| C | -2.187632 | 5.548109  | -2.951293 | C | -2.142487 | -0.801797 | 4.591723  |
| H | -2.868938 | 4.452026  | -1.214868 | H | -3.296504 | 0.700501  | 3.557792  |
| C | -1.092910 | 6.109489  | -3.616543 | C | -0.848620 | -2.278007 | 3.182381  |
| H | 1.038570  | 6.432230  | -3.551435 | H | -0.987041 | -1.931078 | 1.070301  |
| H | -3.183053 | 5.630602  | -3.379284 | C | -1.260131 | -1.874010 | 4.456600  |
| H | -1.230034 | 6.628450  | -4.560171 | H | -2.465506 | -0.480805 | 5.577732  |
| C | -0.293402 | 2.986410  | 3.118326  | H | -0.168226 | -3.116086 | 3.066843  |
| H | -1.067340 | 2.354158  | 3.566022  | H | -0.895185 | -2.394345 | 5.337415  |
| H | 0.647803  | 2.747277  | 3.618152  | H | -3.184282 | 1.132248  | 1.300353  |
| H | -0.538041 | 4.032917  | 3.360771  | H | 2.228119  | -1.733516 | 0.707547  |
| C | 1.719661  | 0.819460  | 2.125146  | C | 3.404503  | -0.408007 | -0.469500 |
| H | 2.134553  | -0.188024 | 1.984545  | C | 4.586539  | -0.757361 | 0.190429  |
| H | 1.254893  | 0.811890  | 3.122866  | C | 3.405091  | 0.696748  | -1.327011 |
| C | 2.875659  | 1.817915  | 2.106504  | C | 5.753334  | -0.018676 | -0.003465 |
| H | 3.279439  | 1.902832  | 1.090952  | H | 4.590397  | -1.611395 | 0.861618  |
| H | 2.517916  | 2.819412  | 2.376515  | C | 4.571894  | 1.435671  | -1.526221 |
| C | 4.031419  | 1.445705  | 3.047061  | H | 2.493173  | 0.995112  | -1.831174 |
| H | 3.669602  | 1.430662  | 4.085843  | C | 5.749412  | 1.080601  | -0.865120 |
| H | 4.354857  | 0.420536  | 2.820243  | H | 6.662062  | -0.297086 | 0.521764  |
| C | 5.237731  | 2.381894  | 2.933870  | H | 4.558535  | 2.291645  | -2.194661 |
| H | 4.936409  | 3.405242  | 3.201026  | H | 6.656575  | 1.658007  | -1.016199 |
| H | 5.557757  | 2.421701  | 1.883367  |   |           |           |           |

<sup>4</sup>IM6-S

B3LYP/BSI SCF energy: -2922.144112a.u.

M06/BSII SCF energy in solution: -2920.8374738a.u.

M06/BSII free energy in solution: -2919.868554a.u.

C -0.633678 -1.638290 -1.091686

N -0.973131 -0.509027 -0.602226

O -1.412354 -2.702480 -0.832777

C -2.531721 -2.257671 0.013357

C -2.247352 -0.685399 0.126120

C 1.777495 -1.288347 -1.169442

N 1.809624 -0.149849 -0.573974

O 2.905347 -2.032259 -1.143476

C 3.772836 -1.426367 -0.120108

C 3.207270 0.049514 -0.116902

Ni 0.189809 1.200903 -0.591009

C 0.602951 -1.881174 -1.937745

C 0.813524 -3.383057 -2.207941

H -0.051209 -3.780927 -2.742025

H 0.939452 -3.954438 -1.286213

H 1.702745 -3.526202 -2.824659

C 0.444356 -1.126048 -3.288114

H 1.351884 -1.251926 -3.887024

H 0.248253 -0.065151 -3.127938

H -0.400278 -1.542424 -3.842583

C 5.221971 -1.594870 -0.562043

C 6.260172 -1.511883 0.375479

C 5.545229 -1.809339 -1.907832

C 7.591043 -1.626985 -0.025564

H 6.032204 -1.369665 1.426732

C 6.876440 -1.934991 -2.305859

H 4.753547 -1.885128 -2.643156

C 7.904956 -1.840795 -1.368140

H 8.381608 -1.558547 0.716145

H 7.107226 -2.106464 -3.353328

H 8.940902 -1.937794 -1.679554

C 3.492028 -2.183394 1.189287

C 3.500615 -1.564927 2.445564

C 3.278303 -3.569632 1.129517

C 3.284805 -2.308161 3.610029

H 3.680615 -0.499070 2.539298

C 3.059515 -4.310479 2.289601

H 3.286329 -4.066067 0.165345

C 3.059427 -3.681340 3.537132

H 3.293026 -1.805903 4.572942

H 2.897629 -5.382379 2.218850

H 2.892041 -4.257514 4.442327

C -3.817765 -2.612309 -0.735626

C -4.961600 -1.809018 -0.688421

C -3.875701 -3.822647 -1.443625

C -6.135055 -2.200206 -1.339125

H -4.957655 -0.865744 -0.154137

C -5.042470 -4.208512 -2.099208

H -2.998305 -4.459044 -1.483975

C -6.179778 -3.398600 -2.048058

H -7.005338 -1.552562 -1.295056

H -5.063946 -5.144635 -2.650036

H -7.089685 -3.699499 -2.559159

C -2.441077 -3.026979 1.335446

C -1.256515 -3.658798 1.732209

C -3.550633 -3.084333 2.190427

C -1.180418 -4.325962 2.956530

H -0.388107 -3.638335 1.084886

C -3.472395 -3.745495 3.414763

|   |           |           |           |   |           |           |           |
|---|-----------|-----------|-----------|---|-----------|-----------|-----------|
| H | -4.483433 | -2.614969 | 1.897122  | H | 0.029168  | 4.450877  | 0.114503  |
| C | -2.286302 | -4.370825 | 3.803933  | C | 1.643089  | 4.776182  | 1.492890  |
| H | -0.249108 | -4.805828 | 3.243365  | H | 2.357303  | 5.141017  | 0.740241  |
| H | -4.343564 | -3.776019 | 4.062823  | H | 2.236443  | 4.196853  | 2.216162  |
| H | -2.227814 | -4.889908 | 4.756308  | C | 1.003594  | 5.972941  | 2.209173  |
| C | -1.090549 | 2.426992  | -1.463602 | H | 0.414995  | 6.555581  | 1.485355  |
| C | -2.272849 | 1.700656  | -2.082163 | H | 0.284184  | 5.606597  | 2.956489  |
| C | -2.168434 | 3.200050  | -0.625138 | C | 2.013936  | 6.900316  | 2.896721  |
| H | -2.266016 | 4.269384  | -0.855714 | H | 2.734645  | 7.265436  | 2.152041  |
| H | -2.139355 | 3.056687  | 0.457777  | H | 2.599389  | 6.321442  | 3.624695  |
| N | -3.200603 | 2.386551  | -1.292378 | C | 1.360737  | 8.093690  | 3.601790  |
| O | -2.456231 | 0.850830  | -2.941640 | H | 0.799455  | 8.713133  | 2.892635  |
| C | -4.590636 | 2.409807  | -1.227431 | H | 2.105842  | 8.734733  | 4.085343  |
| C | -5.238149 | 3.244820  | -0.298884 | H | 0.657395  | 7.760599  | 4.374039  |
| C | -5.363065 | 1.603407  | -2.088012 | H | -3.012654 | -0.163191 | -0.448372 |
| C | -6.630845 | 3.270706  | -0.233751 | C | -2.205563 | -0.086426 | 1.519691  |
| H | -4.646803 | 3.870816  | 0.362043  | C | -3.298224 | 0.651620  | 1.989649  |
| C | -6.753168 | 1.645418  | -2.007455 | C | -1.091439 | -0.246952 | 2.355047  |
| H | -4.855703 | 0.969135  | -2.804936 | C | -3.289432 | 1.202592  | 3.273304  |
| C | -7.399252 | 2.473207  | -1.084046 | H | -4.156189 | 0.819828  | 1.344446  |
| H | -7.116350 | 3.923270  | 0.487095  | C | -1.079622 | 0.304903  | 3.635197  |
| H | -7.338288 | 1.027229  | -2.683603 | H | -0.229162 | -0.802316 | 2.002214  |
| H | -8.483541 | 2.500053  | -1.032345 | C | -2.180382 | 1.028482  | 4.100808  |
| C | -0.377436 | 3.287284  | -2.519260 | H | -4.146142 | 1.774043  | 3.619020  |
| H | 0.128043  | 2.653741  | -3.255800 | H | -0.208540 | 0.169525  | 4.270020  |
| H | 0.377878  | 3.937280  | -2.072796 | H | -2.169406 | 1.458189  | 5.098474  |
| H | -1.086314 | 3.925129  | -3.072439 | H | 3.187513  | 0.441517  | 0.898327  |
| C | 1.264677  | 2.660850  | 0.083243  | C | 3.973180  | 1.037853  | -0.983382 |
| H | 1.900665  | 2.138900  | 0.818975  | C | 4.982682  | 1.809551  | -0.395299 |
| H | 1.937086  | 3.026450  | -0.704630 | C | 3.722919  | 1.188001  | -2.351542 |
| C | 0.622926  | 3.844970  | 0.810420  | C | 5.734339  | 2.703636  | -1.156127 |
| H | -0.078652 | 3.482957  | 1.575591  | H | 5.179004  | 1.715363  | 0.669789  |

|   |          |          |           |   |           |           |           |
|---|----------|----------|-----------|---|-----------|-----------|-----------|
| C | 4.470652 | 2.085777 | -3.115428 | H | -0.361088 | -1.722001 | -3.979302 |
| H | 2.923397 | 0.625962 | -2.821426 | C | 5.092290  | -1.536400 | -0.481860 |
| C | 5.480107 | 2.844183 | -2.521624 | C | 6.069671  | -1.450587 | 0.515628  |
| H | 6.510490 | 3.296523 | -0.680890 | C | 5.486811  | -1.665045 | -1.818391 |
| H | 4.257103 | 2.196888 | -4.174721 | C | 7.423514  | -1.477472 | 0.179869  |
| H | 6.058491 | 3.545582 | -3.115921 | H | 5.774445  | -1.358341 | 1.555410  |

**<sup>1</sup>IM6-R**

B3LYP-D3BJ/BSI SCF energy in solution:

-2922.572248a.u.

M06/BSII SCF energy in solution: -2920.845968a.u.

M06/BSII free energy in solution: -2919.868636a.u.

|    |           |           |           |   |           |           |           |
|----|-----------|-----------|-----------|---|-----------|-----------|-----------|
| C  | -0.709961 | -1.587705 | -1.199136 | H | 4.735405  | -1.731426 | -2.595591 |
| N  | -1.025380 | -0.403735 | -0.840136 | C | 7.813111  | -1.601011 | -1.154489 |
| O  | -1.465520 | -2.600210 | -0.745405 | H | 8.172246  | -1.406065 | 0.963210  |
| C  | -2.471747 | -2.039612 | 0.166442  | H | 7.133582  | -1.800647 | -3.191851 |
| C  | -2.175883 | -0.478884 | 0.075655  | H | 8.866870  | -1.623858 | -1.415846 |
| C  | 1.683953  | -1.307051 | -1.241532 | C | 3.278924  | -2.092377 | 1.193421  |
| N  | 1.700603  | -0.146150 | -0.684339 | C | 3.051410  | -1.416738 | 2.396346  |
| O  | 2.809498  | -2.038486 | -1.157995 | C | 3.225180  | -3.494539 | 1.183642  |
| C  | 3.632130  | -1.386532 | -0.116462 | C | 2.772261  | -2.128740 | 3.566915  |
| C  | 3.079389  | 0.076759  | -0.203882 | H | 3.096942  | -0.335333 | 2.447093  |
| Ni | 0.203701  | 1.219885  | -0.874458 | C | 2.946869  | -4.203456 | 2.349418  |
| C  | 0.523669  | -1.924358 | -2.008218 | H | 3.407007  | -4.027332 | 0.256463  |
| C  | 0.704604  | -3.441800 | -2.161636 | C | 2.721943  | -3.520758 | 3.548535  |
| H  | -0.162890 | -3.862064 | -2.674417 | H | 2.596850  | -1.588274 | 4.492004  |
| H  | 0.815021  | -3.941855 | -1.197358 | H | 2.910996  | -5.288494 | 2.324017  |
| H  | 1.593432  | -3.647840 | -2.760444 | H | 2.509370  | -4.071674 | 4.459604  |
| C  | 0.436676  | -1.249984 | -3.400555 | C | -3.845954 | -2.422878 | -0.358108 |
| H  | 1.382697  | -1.386413 | -3.932076 | C | -4.970559 | -1.642857 | -0.067343 |
| H  | 0.212288  | -0.186438 | -3.309355 | C | -4.010187 | -3.616441 | -1.072161 |
|    |           |           |           | C | -6.240131 | -2.053221 | -0.477720 |
|    |           |           |           | H | -4.867859 | -0.710343 | 0.476563  |
|    |           |           |           | C | -5.276438 | -4.014994 | -1.497892 |
|    |           |           |           | H | -3.144383 | -4.228316 | -1.298024 |
|    |           |           |           | C | -6.397175 | -3.237271 | -1.197238 |
|    |           |           |           | H | -7.100010 | -1.433711 | -0.246590 |

|   |           |           |           |   |           |           |           |
|---|-----------|-----------|-----------|---|-----------|-----------|-----------|
| H | -5.387953 | -4.937387 | -2.060304 | H | 0.313097  | 2.998540  | -3.381346 |
| H | -7.384006 | -3.551066 | -1.524345 | H | 0.243101  | 4.198681  | -2.093219 |
| C | -2.217552 | -2.636236 | 1.547899  | H | -1.086811 | 4.075495  | -3.253087 |
| C | -1.040447 | -3.334913 | 1.831829  | C | 1.242716  | 2.686451  | -0.166908 |
| C | -3.149233 | -2.431565 | 2.573995  | H | 2.008699  | 2.206795  | 0.457023  |
| C | -0.802303 | -3.823663 | 3.118373  | H | 1.784881  | 3.251673  | -0.936543 |
| H | -0.305234 | -3.499891 | 1.054088  | C | 0.453578  | 3.633175  | 0.740454  |
| C | -2.902798 | -2.905152 | 3.860264  | H | -0.220597 | 3.054766  | 1.386553  |
| H | -4.068044 | -1.893358 | 2.373143  | H | -0.191759 | 4.291433  | 0.145964  |
| C | -1.727359 | -3.606738 | 4.138049  | C | 1.334504  | 4.507872  | 1.645669  |
| H | 0.113712  | -4.368471 | 3.317724  | H | 1.997995  | 5.128810  | 1.025781  |
| H | -3.632758 | -2.728857 | 4.644772  | H | 1.993443  | 3.857760  | 2.240220  |
| H | -1.537224 | -3.981356 | 5.139491  | C | 0.529062  | 5.402461  | 2.592017  |
| C | -1.044335 | 2.463315  | -1.767964 | H | -0.130513 | 6.055386  | 2.001997  |
| C | -2.097863 | 1.675683  | -2.517823 | H | -0.134273 | 4.771091  | 3.201150  |
| C | -2.235731 | 3.021600  | -0.917386 | C | 1.395012  | 6.263633  | 3.516490  |
| H | -2.472116 | 4.080815  | -1.082531 | H | 2.048899  | 6.902726  | 2.907445  |
| H | -2.221210 | 2.806784  | 0.151415  | H | 2.061682  | 5.610896  | 4.096918  |
| N | -3.123355 | 2.128710  | -1.684225 | C | 0.575061  | 7.133359  | 4.471256  |
| O | -2.150292 | 0.944234  | -3.497446 | H | -0.083735 | 7.813996  | 3.918801  |
| C | -4.485646 | 1.882216  | -1.601541 | H | 1.218038  | 7.743757  | 5.115206  |
| C | -5.243948 | 2.480476  | -0.579826 | H | -0.058639 | 6.517746  | 5.120980  |
| C | -5.115324 | 1.021436  | -2.521118 | H | -3.023515 | 0.015734  | -0.394068 |
| C | -6.610786 | 2.220933  | -0.484500 | C | -1.869989 | 0.215448  | 1.382321  |
| H | -4.759128 | 3.145256  | 0.127588  | C | -2.843047 | 1.015047  | 1.985665  |
| C | -6.481583 | 0.779909  | -2.413129 | C | -0.626330 | 0.058587  | 2.009174  |
| H | -4.519442 | 0.561381  | -3.299438 | C | -2.582633 | 1.653884  | 3.200750  |
| C | -7.240598 | 1.373874  | -1.399607 | H | -3.804444 | 1.144798  | 1.497590  |
| H | -7.186021 | 2.690130  | 0.308852  | C | -0.365494 | 0.693233  | 3.221443  |
| H | -6.957083 | 0.111360  | -3.125089 | H | 0.134706  | -0.562243 | 1.551528  |
| H | -8.305767 | 1.177997  | -1.324408 | C | -1.342376 | 1.494919  | 3.820333  |
| C | -0.357397 | 3.490844  | -2.668601 | H | -3.345813 | 2.276932  | 3.657787  |

|   |           |          |           |   |           |           |           |
|---|-----------|----------|-----------|---|-----------|-----------|-----------|
| H | 0.600972  | 0.563088 | 3.699158  | C | -0.916076 | -1.229646 | -3.612686 |
| H | -1.136065 | 1.992849 | 4.763270  | H | -0.085519 | -1.374374 | -4.305570 |
| H | 3.054762  | 0.526417 | 0.784232  | H | -1.198458 | -2.205589 | -3.208130 |
| C | 3.859649  | 0.992134 | -1.123941 | H | -1.763918 | -0.819477 | -4.163158 |
| C | 4.934066  | 1.716339 | -0.596562 | C | -0.143625 | 1.131270  | -3.126835 |
| C | 3.567326  | 1.101839 | -2.486151 | H | -0.985173 | 1.492053  | -3.723236 |
| C | 5.718542  | 2.522164 | -1.419485 | H | 0.078053  | 1.871075  | -2.355075 |
| H | 5.159971  | 1.640201 | 0.463349  | H | 0.720832  | 1.006686  | -3.786809 |
| C | 4.347138  | 1.914776 | -3.311086 | C | -4.456840 | 1.884583  | -1.390268 |
| H | 2.724134  | 0.566973 | -2.906921 | C | -5.762338 | 2.157302  | -1.817957 |
| C | 5.426972  | 2.622941 | -2.782204 | C | -3.583719 | 2.965350  | -1.170682 |
| H | 6.552614  | 3.074869 | -0.997147 | C | -6.198263 | 3.473947  | -1.988457 |
| H | 4.107526  | 1.993827 | -4.367555 | H | -6.448737 | 1.345304  | -2.024499 |
| H | 6.034173  | 3.253632 | -3.424803 | C | -4.020530 | 4.277063  | -1.347590 |

**<sup>1</sup>TS10-R**

B3LYP/BSI SCF energy: -2922.086423a.u.

M06/BSII SCF energy in solution: -2920.78595a.u.

M06/BSII free energy in solution: -2919.822017a.u.

|    |           |           |           |   |           |           |           |
|----|-----------|-----------|-----------|---|-----------|-----------|-----------|
| C  | 0.694164  | -0.760374 | -1.727861 | C | -5.332176 | 4.539163  | -1.749750 |
| N  | 1.176237  | -0.342841 | -0.611444 | H | -7.217603 | 3.660266  | -2.315254 |
| O  | 1.387754  | -1.739812 | -2.358739 | H | -3.325740 | 5.093681  | -1.173249 |
| C  | 2.379371  | -2.262568 | -1.418415 | H | -5.671481 | 5.562646  | -1.883318 |
| C  | 2.436635  | -1.079152 | -0.354494 | C | -4.945534 | -0.641668 | -1.474558 |
| C  | -1.704273 | -0.037079 | -1.564494 | C | -6.086199 | -0.744281 | -0.660617 |
| N  | -1.740707 | -0.129663 | -0.294468 | C | -4.783192 | -1.572197 | -2.507145 |
| O  | -2.841911 | 0.314617  | -2.217667 | C | -7.028216 | -1.749035 | -0.870888 |
| C  | -3.915665 | 0.457603  | -1.221829 | H | -6.238984 | -0.036594 | 0.146461  |
| C  | -3.080546 | 0.279264  | 0.143973  | C | -5.726743 | -2.581528 | -2.717087 |
| Ni | 0.352003  | 0.659359  | 0.867173  | H | -3.918730 | -1.502707 | -3.154806 |
| C  | -0.514816 | -0.240643 | -2.491226 | C | -6.851873 | -2.675921 | -1.900680 |
|    |           |           |           | H | -7.900114 | -1.808239 | -0.225730 |
|    |           |           |           | H | -5.578462 | -3.291329 | -3.526291 |
|    |           |           |           | H | -7.585547 | -3.460158 | -2.063984 |
|    |           |           |           | C | 3.664640  | -2.528806 | -2.200690 |
|    |           |           |           | C | 4.597931  | -3.474003 | -1.755444 |

|   |           |           |           |   |           |           |           |
|---|-----------|-----------|-----------|---|-----------|-----------|-----------|
| C | 3.945129  | -1.810476 | -3.370990 | C | 3.182778  | 5.399647  | -1.735487 |
| C | 5.785018  | -3.688795 | -2.456299 | H | 1.377541  | 4.215196  | -1.599068 |
| H | 4.396810  | -4.057985 | -0.864118 | C | 4.330772  | 5.856092  | -1.079122 |
| C | 5.127651  | -2.032408 | -4.076108 | H | 5.445165  | 5.799304  | 0.766800  |
| H | 3.230288  | -1.083280 | -3.736749 | H | 2.981506  | 5.715501  | -2.756124 |
| C | 6.054905  | -2.970339 | -3.620844 | H | 5.026597  | 6.520822  | -1.582035 |
| H | 6.494393  | -4.426929 | -2.092982 | C | -1.029515 | 2.965229  | 2.670530  |
| H | 5.322658  | -1.468535 | -4.983884 | H | -1.969439 | 2.625425  | 2.227421  |
| H | 6.975928  | -3.142082 | -4.170312 | H | -1.077799 | 2.783452  | 3.749876  |
| C | 1.795266  | -3.553294 | -0.822564 | H | -0.966996 | 4.049871  | 2.514700  |
| C | 0.949269  | -4.351029 | -1.606885 | C | -0.054243 | 0.487388  | 2.760763  |
| C | 2.130069  | -4.002315 | 0.461895  | H | 0.078924  | -0.514199 | 2.255075  |
| C | 0.437342  | -5.550227 | -1.113494 | H | -1.110931 | 0.553964  | 3.030228  |
| H | 0.691417  | -4.024347 | -2.607769 | C | 0.824287  | 0.487200  | 4.011727  |
| C | 1.623588  | -5.207797 | 0.954357  | H | 1.877480  | 0.374913  | 3.725909  |
| H | 2.795320  | -3.422649 | 1.094462  | H | 0.746039  | 1.448325  | 4.539178  |
| C | 0.771440  | -5.984232 | 0.170736  | C | 0.453228  | -0.637250 | 4.994181  |
| H | -0.221600 | -6.148258 | -1.736626 | H | -0.606982 | -0.544430 | 5.268387  |
| H | 1.895793  | -5.533646 | 1.954119  | H | 0.551629  | -1.608409 | 4.488944  |
| H | 0.373244  | -6.918654 | 0.555185  | C | 1.311012  | -0.633792 | 6.266075  |
| C | 0.158359  | 2.273784  | 2.010092  | H | 1.207586  | 0.337756  | 6.770692  |
| C | 0.382818  | 2.730663  | 0.545771  | H | 2.372070  | -0.718768 | 5.989556  |
| C | 1.557174  | 2.904194  | 2.287708  | C | 0.956164  | -1.753937 | 7.252525  |
| H | 1.515411  | 3.775622  | 2.955260  | H | -0.104361 | -1.671112 | 7.526796  |
| H | 2.349100  | 2.227084  | 2.615819  | H | 1.063449  | -2.725289 | 6.750501  |
| N | 1.644290  | 3.283653  | 0.874928  | C | 1.814973  | -1.736554 | 8.521157  |
| O | -0.341003 | 3.001696  | -0.426431 | H | 1.700747  | -0.790922 | 9.063461  |
| C | 2.520374  | 4.135048  | 0.224729  | H | 1.538668  | -2.546589 | 9.204257  |
| C | 3.671623  | 4.600560  | 0.888896  | H | 2.878402  | -1.851778 | 8.281620  |
| C | 2.278758  | 4.551415  | -1.101851 | C | -3.636440 | -0.636346 | 1.215558  |
| C | 4.561694  | 5.451569  | 0.237625  | C | -4.367253 | -0.092675 | 2.279857  |
| H | 3.867860  | 4.285427  | 1.909029  | C | -3.418513 | -2.019393 | 1.184664  |





|   |           |           |           |   |           |           |           |
|---|-----------|-----------|-----------|---|-----------|-----------|-----------|
| H | -4.859667 | 6.489314  | 0.393139  | H | 1.109289  | -5.116649 | 0.480063  |
| C | -5.082850 | 0.461829  | -1.207029 | H | -0.823838 | -5.702301 | -0.973363 |
| C | -6.183508 | 0.311084  | -0.352091 | C | 0.469619  | 0.807372  | 3.001356  |
| C | -5.075219 | -0.209163 | -2.432025 | C | 0.724102  | 2.062705  | 2.156203  |
| C | -7.255910 | -0.498831 | -0.717476 | C | 2.009367  | 0.774717  | 3.215214  |
| H | -6.196107 | 0.826563  | 0.602850  | H | 2.303148  | 0.958854  | 4.256392  |
| C | -6.153111 | -1.018687 | -2.799167 | H | 2.547566  | -0.094598 | 2.830680  |
| H | -4.226321 | -0.099976 | -3.095897 | N | 2.130301  | 1.970794  | 2.377253  |
| C | -7.244475 | -1.168191 | -1.944312 | O | 0.064687  | 3.062242  | 1.797617  |
| H | -8.099627 | -0.609626 | -0.042907 | C | 3.186779  | 2.820873  | 2.164052  |
| H | -6.134657 | -1.533464 | -3.755367 | C | 4.475820  | 2.481286  | 2.624030  |
| H | -8.080406 | -1.800250 | -2.228935 | C | 3.002305  | 4.048250  | 1.488774  |
| C | 3.298215  | -1.481908 | -2.801758 | C | 5.543604  | 3.350907  | 2.418351  |
| C | 4.016115  | -2.676594 | -2.684383 | H | 4.630469  | 1.536114  | 3.134577  |
| C | 3.788094  | -0.478030 | -3.648370 | C | 4.083339  | 4.902358  | 1.295868  |
| C | 5.208468  | -2.859194 | -3.387250 | H | 2.008832  | 4.304759  | 1.142863  |
| H | 3.651320  | -3.470939 | -2.043886 | C | 5.362019  | 4.568109  | 1.755870  |
| C | 4.975512  | -0.663239 | -4.353348 | H | 6.530479  | 3.068744  | 2.775693  |
| H | 3.239837  | 0.450461  | -3.748354 | H | 3.923900  | 5.844332  | 0.776976  |
| C | 5.694330  | -1.853500 | -4.222305 | H | 6.199233  | 5.241148  | 1.598655  |
| H | 5.753628  | -3.792504 | -3.281038 | C | -0.389537 | 1.021211  | 4.235393  |
| H | 5.341044  | 0.126253  | -5.003442 | H | -1.416606 | 1.268056  | 3.950296  |
| H | 6.621952  | -1.995723 | -4.768779 | H | -0.420311 | 0.141005  | 4.887326  |
| C | 1.240782  | -2.468366 | -1.661683 | H | 0.003778  | 1.860164  | 4.824300  |
| C | 0.160057  | -2.811461 | -2.483300 | C | -0.287608 | -0.889850 | 2.399339  |
| C | 1.570973  | -3.313687 | -0.594194 | H | -0.521855 | -1.265081 | 1.378534  |
| C | -0.581732 | -3.966949 | -2.234173 | H | -1.238689 | -0.850587 | 2.934464  |
| H | -0.100007 | -2.171041 | -3.317968 | C | 0.627762  | -1.940809 | 3.019609  |
| C | 0.835890  | -4.475014 | -0.351441 | H | 1.557882  | -2.004220 | 2.440417  |
| H | 2.409352  | -3.079080 | 0.053065  | H | 0.913887  | -1.678427 | 4.046695  |
| C | -0.247220 | -4.802995 | -1.167208 | C | -0.054619 | -3.315958 | 3.012741  |
| H | -1.421742 | -4.213049 | -2.877086 | H | -0.943583 | -3.282798 | 3.657756  |

H -0.424328 -3.520158 2.000059  
C 0.857803 -4.463097 3.450975  
H 1.224801 -4.279473 4.470738  
H 1.748649 -4.481968 2.806300  
C 0.169646 -5.830377 3.396102  
H -0.708178 -5.819427 4.056060  
H -0.216753 -5.996349 2.381113  
C 1.091164 -6.986319 3.788090  
H 1.468862 -6.863712 4.810104  
H 0.570926 -7.949310 3.739766  
H 1.959971 -7.044950 3.121349  
C -3.390461 -0.888253 0.708489  
C -4.100855 -1.178989 1.877055  
C -2.986021 -1.938010 -0.123047  
C -4.412564 -2.498175 2.209969  
H -4.404044 -0.366360 2.532001  
C -3.295661 -3.256733 0.207345  
H -2.409021 -1.728806 -1.017770  
C -4.010060 -3.540980 1.374018  
H -4.961581 -2.710068 3.122860  
H -2.968097 -4.062353 -0.441188  
H -4.244811 -4.569365 1.632536  
H -3.124176 1.124056 1.309051  
H 2.288779 -1.065413 0.225760  
C 3.636660 0.360930 -0.587800  
C 4.782528 -0.300515 -0.130966  
C 3.748334 1.674671 -1.051150  
C 6.024507 0.330971 -0.160864  
H 4.700792 -1.319728 0.237021  
C 4.989557 2.310478 -1.075932  
H 2.862375 2.205481 -1.379921  
C 6.131337 1.639270 -0.638351

H 6.906733 -0.194538 0.193075  
H 5.060623 3.336202 -1.423324  
H 7.096070 2.137312 -0.654092

**<sup>1</sup>TS10-R**

wB97XD/BSI SCF energy in gas:

-2921.280011a.u.

wB97XD/BSII SCF energy in solution:

-2921.930066a.u.

wB97XD/BSII free energy in solution:

-2920.943388a.u.

C 0.750712 0.727469 -1.745337  
N 1.220911 0.641915 -0.559354  
O 1.374721 0.004276 -2.700812  
C 2.147115 -0.989014 -1.978960  
C 2.404069 -0.220276 -0.630601  
C -1.641478 1.001009 -1.342987  
N -1.573371 0.395381 -0.229526  
O -2.860769 1.316009 -1.810431  
C -3.841226 0.757959 -0.882395  
C -2.912194 0.326136 0.329643  
Ni 0.074546 0.458092 1.103494  
C -0.470179 1.514835 -2.157456  
C -0.750527 1.370644 -3.659175  
H 0.097052 1.744546 -4.237431  
H -0.918845 0.327967 -3.938703  
H -1.639196 1.947912 -3.919455  
C -0.281727 3.000766 -1.776738  
H -1.164570 3.569452 -2.080198  
H -0.154625 3.102120 -0.697678  
H 0.594208 3.408185 -2.289875

|   |           |           |           |   |           |           |           |
|---|-----------|-----------|-----------|---|-----------|-----------|-----------|
| C | -4.768629 | 1.911921  | -0.520031 | H | 6.736953  | -2.027884 | -4.615728 |
| C | -6.101765 | 1.965476  | -0.924861 | C | 1.214823  | -2.187831 | -1.762870 |
| C | -4.229446 | 2.999102  | 0.181820  | C | 0.193919  | -2.427681 | -2.686005 |
| C | -6.895886 | 3.063874  | -0.601430 | C | 1.359239  | -3.065895 | -0.686789 |
| H | -6.528620 | 1.150281  | -1.497939 | C | -0.670724 | -3.505128 | -2.531808 |
| C | -5.022103 | 4.095237  | 0.497463  | H | 0.078969  | -1.759017 | -3.530936 |
| H | -3.182974 | 3.005211  | 0.480700  | C | 0.503053  | -4.154821 | -0.538208 |
| C | -6.361398 | 4.128322  | 0.114464  | H | 2.142704  | -2.914944 | 0.050438  |
| H | -7.934184 | 3.085105  | -0.917802 | C | -0.515754 | -4.377464 | -1.458304 |
| H | -4.587756 | 4.926766  | 1.043150  | H | -1.469460 | -3.660391 | -3.249961 |
| H | -6.981054 | 4.983168  | 0.367367  | H | 0.631999  | -4.824696 | 0.306466  |
| C | -4.488805 | -0.446765 | -1.544414 | H | -1.188551 | -5.220683 | -1.338029 |
| C | -5.530785 | -1.122659 | -0.900048 | C | 0.041800  | 0.966975  | 2.994556  |
| C | -3.987730 | -0.968987 | -2.735373 | C | -0.045562 | 2.211147  | 2.095073  |
| C | -6.055795 | -2.291598 | -1.434473 | C | 1.441884  | 1.508338  | 3.394417  |
| H | -5.921842 | -0.739920 | 0.037026  | H | 1.529052  | 1.785598  | 4.452708  |
| C | -4.512295 | -2.143693 | -3.270463 | H | 2.295454  | 0.888448  | 3.103402  |
| H | -3.185405 | -0.453121 | -3.249113 | N | 1.224597  | 2.658292  | 2.527020  |
| C | -5.545217 | -2.810080 | -2.622485 | O | -0.940386 | 2.867959  | 1.542904  |
| H | -6.860946 | -2.803009 | -0.916703 | C | 2.125509  | 3.565105  | 2.003654  |
| H | -4.109902 | -2.534590 | -4.200405 | C | 3.464643  | 3.550559  | 2.415458  |
| H | -5.953237 | -3.725606 | -3.039105 | C | 1.703162  | 4.525649  | 1.069918  |
| C | 3.386528  | -1.321925 | -2.783246 | C | 4.362927  | 4.474947  | 1.896556  |
| C | 4.002126  | -2.568231 | -2.673897 | H | 3.797795  | 2.813875  | 3.139405  |
| C | 3.983552  | -0.336424 | -3.573073 | C | 2.617902  | 5.433126  | 0.553245  |
| C | 5.204914  | -2.819674 | -3.328640 | H | 0.656718  | 4.556087  | 0.791646  |
| H | 3.545288  | -3.351276 | -2.078159 | C | 3.951601  | 5.420519  | 0.961211  |
| C | 5.179847  | -0.590736 | -4.231236 | H | 5.398490  | 4.446721  | 2.222335  |
| H | 3.513009  | 0.635976  | -3.656890 | H | 2.278448  | 6.172279  | -0.166994 |
| C | 5.798397  | -1.832189 | -4.106836 | H | 4.657344  | 6.142040  | 0.561874  |
| H | 5.674766  | -3.793252 | -3.230484 | C | -1.018234 | 0.894638  | 4.079869  |
| H | 5.633820  | 0.186830  | -4.837196 | H | -1.999263 | 0.711118  | 3.632468  |

H -0.820267 0.097730 4.805196  
H -1.065890 1.846400 4.622505  
C 0.060297 -0.892175 2.454654  
H 0.072342 -1.356869 1.423997  
H -0.897610 -1.193129 2.889229  
C 1.208867 -1.527727 3.229081  
H 2.163598 -1.288502 2.741163  
H 1.272388 -1.124157 4.249071  
C 1.051369 -3.048084 3.303943  
H 0.112470 -3.286473 3.821758  
H 0.938815 -3.446150 2.286094  
C 2.215926 -3.749446 3.999499  
H 2.334359 -3.342538 5.013214  
H 3.150604 -3.517648 3.469203  
C 2.044949 -5.266216 4.080759  
H 1.110670 -5.493997 4.609706  
H 1.926678 -5.671445 3.066705  
C 3.211875 -5.962750 4.777657  
H 3.335852 -5.588666 5.799562  
H 3.059350 -7.044543 4.833784  
H 4.152132 -5.783453 4.245204  
C -3.166486 -0.997476 1.002923  
C -3.925775 -1.041796 2.170863  
C -2.604718 -2.173992 0.507084  
C -4.131835 -2.248849 2.834556  
H -4.351826 -0.122787 2.566885  
C -2.802628 -3.377005 1.172000  
H -1.994301 -2.139129 -0.390315  
C -3.567466 -3.419117 2.336470  
H -4.720647 -2.271233 3.746406  
H -2.349759 -4.283182 0.782534  
H -3.717261 -4.360649 2.855943

H -2.957290 1.101230 1.100922  
H 2.377512 -0.918784 0.205985  
C 3.694090 0.565469 -0.561209  
C 4.875245 -0.111847 -0.249018  
C 3.746646 1.927545 -0.848786  
C 6.094445 0.552588 -0.257457  
H 4.839997 -1.175525 -0.026672  
C 4.968507 2.594788 -0.856637  
H 2.830189 2.476451 -1.036763  
C 6.143556 1.910059 -0.568444  
H 7.006641 0.012436 -0.023868  
H 4.990996 3.659032 -1.063845  
H 7.095065 2.432745 -0.574808

**<sup>1</sup>TS10-S**

B3LYP/BSI SCF energy: -2922.088159a.u.

M06/BSII SCF energy in solution: -2920.7929746a.u.

M06/BSII free energy in solution: -2919.826071a.u.

C 0.793819 -1.824364 -0.006332  
N 1.070759 -0.576316 0.075099  
O 1.761782 -2.644088 -0.474630  
C 2.949988 -1.840225 -0.790711  
C 2.480261 -0.385096 -0.332557  
C -1.704829 -1.682272 0.251907  
N -1.803165 -0.411571 0.327566  
O -2.848088 -2.383085 0.023573  
C -3.878249 -1.412325 -0.357205  
C -3.223992 -0.058154 0.179354  
Ni -0.068094 0.942325 0.689343  
C -0.465362 -2.541833 0.458941  
C -0.623977 -3.887823 -0.284076

|   |           |           |           |   |          |           |           |
|---|-----------|-----------|-----------|---|----------|-----------|-----------|
| H | 0.261631  | -4.503857 | -0.127189 | C | 6.107977 | -2.260562 | 1.386359  |
| H | -0.759595 | -3.743743 | -1.359814 | H | 4.968329 | -0.576291 | 0.731157  |
| H | -1.496339 | -4.417673 | 0.100354  | C | 5.304282 | -4.431922 | 0.718724  |
| C | -0.304810 | -2.807373 | 1.988024  | H | 3.535197 | -4.445138 | -0.500707 |
| H | -1.190197 | -3.330832 | 2.362019  | C | 6.240144 | -3.646478 | 1.398052  |
| H | -0.167856 | -1.872431 | 2.537736  | H | 6.814918 | -1.634346 | 1.920989  |
| H | 0.566076  | -3.449606 | 2.150774  | H | 5.395958 | -5.514447 | 0.720495  |
| C | -5.182838 | -1.847229 | 0.308199  | H | 7.061912 | -4.114053 | 1.932820  |
| C | -6.425938 | -1.572995 | -0.276057 | C | 3.227924 | -1.989221 | -2.289725 |
| C | -5.155149 | -2.512816 | 1.542195  | C | 2.274894 | -2.527557 | -3.161520 |
| C | -7.611040 | -1.943517 | 0.361671  | C | 4.459531 | -1.571414 | -2.814538 |
| H | -6.475995 | -1.078266 | -1.239683 | C | 2.542683 | -2.637467 | -4.528318 |
| C | -6.338817 | -2.889071 | 2.174855  | H | 1.325916 | -2.875126 | -2.771101 |
| H | -4.202987 | -2.744056 | 2.004459  | C | 4.723091 | -1.674453 | -4.178521 |
| C | -7.573293 | -2.603874 | 1.589116  | H | 5.218660 | -1.168199 | -2.152282 |
| H | -8.563989 | -1.721601 | -0.110316 | C | 3.764892 | -2.208770 | -5.043124 |
| H | -6.294046 | -3.407096 | 3.128609  | H | 1.791471 | -3.063025 | -5.187923 |
| H | -8.495171 | -2.897530 | 2.082734  | H | 5.682129 | -1.342113 | -4.565424 |
| C | -3.972762 | -1.440829 | -1.890368 | H | 3.973057 | -2.294265 | -6.105738 |
| C | -4.368122 | -0.321745 | -2.635501 | C | 0.163933 | 2.488604  | 1.968333  |
| C | -3.718731 | -2.639019 | -2.574334 | C | 0.707706 | 1.186752  | 2.574446  |
| C | -4.491527 | -0.392764 | -4.025548 | C | 1.643753 | 2.976294  | 1.965985  |
| H | -4.593433 | 0.618719  | -2.142094 | H | 1.821418 | 3.806088  | 2.664271  |
| C | -3.835275 | -2.709135 | -3.961939 | H | 2.093211 | 3.209287  | 0.998118  |
| H | -3.426787 | -3.517921 | -2.011154 | N | 2.049875 | 1.683049  | 2.522355  |
| C | -4.220510 | -1.585048 | -4.695016 | O | 0.257566 | 0.265134  | 3.277440  |
| H | -4.797408 | 0.489110  | -4.581050 | C | 3.254223 | 1.265907  | 3.046745  |
| H | -3.628066 | -3.646519 | -4.470498 | C | 4.416457 | 2.048078  | 2.869317  |
| H | -4.311179 | -1.639241 | -5.775932 | C | 3.351416 | 0.052367  | 3.765533  |
| C | 4.105121  | -2.433566 | 0.022493  | C | 5.634924 | 1.626806  | 3.400154  |
| C | 5.045994  | -1.657097 | 0.704789  | H | 4.353500 | 2.986892  | 2.327110  |
| C | 4.252972  | -3.830721 | 0.032833  | C | 4.577747 | -0.347211 | 4.285552  |

H 2.453733 -0.535338 3.913966  
 C 5.729990 0.428502 4.111735  
 H 6.516214 2.247700 3.259158  
 H 4.633758 -1.280259 4.840308  
 H 6.679267 0.109920 4.531885  
 C -0.800496 3.250916 2.869026  
 H -1.730421 2.692982 2.997423  
 H -1.045813 4.245520 2.479849  
 H -0.352862 3.382251 3.862942  
 C -0.756731 2.733695 0.259842  
 H -0.854638 2.027887 -0.610527  
 H -1.765798 2.941572 0.627328  
 C -0.116070 4.004672 -0.304326  
 H 0.869404 3.763094 -0.719065  
 H 0.046097 4.749939 0.486884  
 C -0.967639 4.649941 -1.411115  
 H -1.960127 4.900646 -1.009428  
 H -1.137607 3.914815 -2.210673  
 C -0.326727 5.908547 -2.009548  
 H -0.147713 6.641772 -1.209831  
 H 0.663446 5.651116 -2.412067  
 C -1.166628 6.563043 -3.114144  
 H -2.155617 6.821744 -2.711517  
 H -1.347496 5.830010 -3.912493  
 C -0.514394 7.815219 -3.708948  
 H -0.352542 8.580323 -2.940938  
 H -1.136520 8.258707 -4.493546  
 H 0.461367 7.581752 -4.150531  
 H 3.018879 -0.111360 0.576321  
 C 2.650276 0.746120 -1.328603  
 C 3.697761 1.660292 -1.165616  
 C 1.782516 0.902970 -2.417950

C 3.886326 2.702072 -2.077937  
 H 4.362755 1.569080 -0.310289  
 C 1.966983 1.942059 -3.328279  
 H 0.957844 0.210675 -2.550727  
 C 3.021962 2.844426 -3.163435  
 H 4.704519 3.402442 -1.935140  
 H 1.286624 2.048160 -4.168534  
 H 3.166050 3.652522 -3.875046  
 H -3.300551 0.704051 -0.598122  
 C -3.816619 0.521891 1.454508  
 C -4.985042 1.292202 1.368593  
 C -3.236512 0.311256 2.710932  
 C -5.579556 1.819723 2.513473  
 H -5.439647 1.475926 0.397845  
 C -3.831550 0.843179 3.858609  
 H -2.293484 -0.217403 2.796723  
 C -5.005127 1.591374 3.766202  
 H -6.486603 2.411410 2.427239  
 H -3.362159 0.679132 4.824343  
 H -5.463848 2.003809 4.660447

**<sup>1</sup>TS10-S**

B3LYP-D3BJ/BSI SCF energy in solution:

-2922.511477a.u.

M06/BSII SCF energy in solution: -2920.799952a.u.

M06/BSII free energy in solution: -2919.826138a.u.

B3LYP-D3BJ/BSI SCF energy: -2922.511477a.u.

B3LYP-D3BJ/BSII SCF energy in solution:

-2923.165507a.u.

B3LYP-D3BJ/BSII free energy in solution:

-2922.191693 a.u.

|    |           |           |           |   |           |           |           |
|----|-----------|-----------|-----------|---|-----------|-----------|-----------|
| C  | 1.031772  | -1.646560 | 0.999102  | C | -2.862418 | -1.915490 | -1.412884 |
| N  | 1.255179  | -0.396609 | 0.834805  | C | -2.936792 | -0.955322 | -2.428992 |
| O  | 1.873171  | -2.512544 | 0.401565  | C | -2.377684 | -3.192755 | -1.727111 |
| C  | 2.878573  | -1.741264 | -0.333379 | C | -2.513181 | -1.257961 | -3.725816 |
| C  | 2.421894  | -0.239729 | -0.051282 | H | -3.329006 | 0.035399  | -2.227950 |
| C  | -1.394319 | -1.605719 | 1.194597  | C | -1.954224 | -3.494005 | -3.020504 |
| N  | -1.552945 | -0.358033 | 0.956921  | H | -2.327998 | -3.948945 | -0.952375 |
| O  | -2.433662 | -2.419739 | 0.896737  | C | -2.012870 | -2.524580 | -4.024466 |
| C  | -3.314435 | -1.624815 | 0.020339  | H | -2.576348 | -0.498388 | -4.499185 |
| C  | -2.920379 | -0.165036 | 0.461923  | H | -1.577265 | -4.487797 | -3.242938 |
| Ni | -0.066113 | 1.089856  | 1.122258  | H | -1.675763 | -2.756058 | -5.030047 |
| C  | -0.136790 | -2.242870 | 1.767384  | C | 4.240879  | -2.074414 | 0.256157  |
| C  | -0.181225 | -3.771407 | 1.618349  | C | 5.306123  | -1.173757 | 0.158829  |
| H  | 0.734617  | -4.207706 | 2.021106  | C | 4.460796  | -3.326666 | 0.843992  |
| H  | -0.281438 | -4.078453 | 0.575504  | C | 6.571984  | -1.520012 | 0.633782  |
| H  | -1.029598 | -4.169422 | 2.178283  | H | 5.153735  | -0.192879 | -0.277494 |
| C  | -0.008736 | -1.854413 | 3.262891  | C | 5.721637  | -3.665438 | 1.333028  |
| H  | -0.880738 | -2.223961 | 3.810784  | H | 3.641957  | -4.032489 | 0.922142  |
| H  | 0.075687  | -0.772179 | 3.387341  | C | 6.784065  | -2.764776 | 1.225515  |
| H  | 0.885232  | -2.327991 | 3.680024  | H | 7.385634  | -0.806499 | 0.552005  |
| C  | -4.749979 | -2.011297 | 0.298009  | H | 5.874413  | -4.636022 | 1.795991  |
| C  | -5.729172 | -1.858890 | -0.689291 | H | 7.766968  | -3.030839 | 1.602848  |
| C  | -5.130529 | -2.435534 | 1.577365  | C | 2.793511  | -2.150446 | -1.800916 |
| C  | -7.070133 | -2.115294 | -0.399445 | C | 1.716138  | -2.899010 | -2.283969 |
| H  | -5.447930 | -1.538185 | -1.686344 | C | 3.769863  | -1.708861 | -2.703477 |
| C  | -6.469118 | -2.697898 | 1.863035  | C | 1.616123  | -3.197571 | -3.644607 |
| H  | -4.378463 | -2.555071 | 2.347819  | H | 0.946590  | -3.241016 | -1.603380 |
| C  | -7.444866 | -2.535024 | 0.877163  | C | 3.662126  | -1.995638 | -4.062035 |
| H  | -7.819557 | -1.990899 | -1.175550 | H | 4.613665  | -1.129304 | -2.348041 |
| H  | -6.750120 | -3.026691 | 2.859192  | C | 2.583096  | -2.743245 | -4.539675 |
| H  | -8.487861 | -2.736853 | 1.102309  | H | 0.772971  | -3.779860 | -4.001146 |
|    |           |           |           | H | 4.423611  | -1.635383 | -4.747425 |

|   |           |           |           |   |           |           |           |
|---|-----------|-----------|-----------|---|-----------|-----------|-----------|
| H | 2.500403  | -2.970392 | -5.598418 | C | -1.229050 | 4.712525  | -3.123454 |
| C | 0.050798  | 3.039897  | 1.689500  | H | -1.197592 | 5.717419  | -2.679323 |
| C | 0.817290  | 2.097563  | 2.587542  | H | -0.209036 | 4.499276  | -3.471388 |
| C | 1.430205  | 3.638998  | 1.300922  | C | -2.180581 | 4.715380  | -4.323169 |
| H | 1.549670  | 4.687806  | 1.598246  | H | -3.201599 | 4.924537  | -3.975837 |
| H | 1.745506  | 3.510608  | 0.263711  | H | -2.207638 | 3.707924  | -4.760953 |
| N | 2.072675  | 2.708205  | 2.231895  | C | -1.789111 | 5.728160  | -5.400734 |
| O | 0.558607  | 1.429334  | 3.616110  | H | -1.782336 | 6.749306  | -5.001633 |
| C | 3.369869  | 2.261125  | 2.293211  | H | -2.486299 | 5.706899  | -6.245622 |
| C | 4.393504  | 2.921134  | 1.582644  | H | -0.785911 | 5.521308  | -5.792144 |
| C | 3.700773  | 1.140176  | 3.088427  | H | 3.202382  | 0.277797  | 0.505895  |
| C | 5.712578  | 2.478983  | 1.683225  | C | 2.074246  | 0.578194  | -1.272423 |
| H | 4.148509  | 3.781759  | 0.968059  | C | 2.935376  | 1.595933  | -1.689106 |
| C | 5.021924  | 0.714702  | 3.171541  | C | 0.923035  | 0.305718  | -2.025007 |
| H | 2.906304  | 0.637269  | 3.626937  | C | 2.666913  | 2.321198  | -2.854125 |
| C | 6.041483  | 1.380137  | 2.480376  | H | 3.817271  | 1.821919  | -1.096441 |
| H | 6.489912  | 3.004340  | 1.134234  | C | 0.658047  | 1.020648  | -3.189702 |
| H | 5.260063  | -0.154285 | 3.779194  | H | 0.238700  | -0.473323 | -1.708370 |
| H | 7.069434  | 1.041161  | 2.556141  | C | 1.531999  | 2.028796  | -3.610819 |
| C | -0.978947 | 3.930910  | 2.356505  | H | 3.344418  | 3.109975  | -3.167958 |
| H | -1.781502 | 3.325626  | 2.787223  | H | -0.229241 | 0.787696  | -3.770205 |
| H | -1.429643 | 4.657620  | 1.672449  | H | 1.324531  | 2.583683  | -4.521020 |
| H | -0.506756 | 4.490070  | 3.175209  | H | -2.892313 | 0.485525  | -0.409746 |
| C | -1.005608 | 2.525253  | 0.098986  | C | -3.810006 | 0.485462  | 1.497243  |
| H | -1.005572 | 1.601549  | -0.511679 | C | -4.972714 | 1.140740  | 1.073938  |
| H | -2.017765 | 2.682376  | 0.479386  | C | -3.514967 | 0.433554  | 2.862537  |
| C | -0.618125 | 3.626772  | -0.884587 | C | -5.838800 | 1.717311  | 2.001161  |
| H | 0.376021  | 3.418543  | -1.292866 | H | -5.204368 | 1.187747  | 0.013544  |
| H | -0.567380 | 4.610569  | -0.401033 | C | -4.377459 | 1.018733  | 3.792335  |
| C | -1.613066 | 3.690496  | -2.050563 | H | -2.605468 | -0.050020 | 3.199020  |
| H | -2.616668 | 3.919796  | -1.664790 | C | -5.542737 | 1.657166  | 3.365678  |
| H | -1.679600 | 2.695277  | -2.510896 | H | -6.740639 | 2.217029  | 1.659767  |



H -4.134744 0.975959 4.850141

H -6.213756 2.109990 4.089653

**<sup>1</sup>TS10-S**

wB97XD/BSI SCF energy in gas:

-2921.292245a.u.

wB97XD/BSII SCF energy in solution:

-2921.939113a.u.

wB97XD/BSII free energy in solution:

-2920.948575a.u.

C 0.895462 -1.747020 0.688467

N 1.160731 -0.500487 0.658731

O 1.818683 -2.584856 0.187873

C 2.825689 -1.788394 -0.481673

C 2.493941 -0.337424 0.065795

C -1.556108 -1.625068 0.650779

N -1.611661 -0.376310 0.409103

O -2.677654 -2.341870 0.429538

C -3.540848 -1.493512 -0.373077

C -2.975285 -0.065981 -0.005360

Ni -0.093747 1.028030 1.005334

C -0.373182 -2.400046 1.200904

C -0.443976 -3.868959 0.752024

H 0.407357 -4.417096 1.158367

H -0.425272 -3.972118 -0.335502

H -1.364626 -4.318205 1.127354

C -0.411368 -2.328241 2.744989

H -1.326733 -2.806124 3.106342

H -0.376005 -1.293304 3.095592

H 0.444884 -2.875159 3.151064

C -4.977099 -1.757049 0.040494

C -6.025516 -1.685338 -0.875185

C -5.267333 -2.004647 1.385148

C -7.343458 -1.842436 -0.452631

H -5.821817 -1.511782 -1.926126

C -6.581038 -2.165180 1.804677

H -4.460013 -2.057522 2.106245

C -7.625585 -2.080699 0.887057

H -8.147982 -1.784068 -1.178944

H -6.788780 -2.350891 2.853504

H -8.652665 -2.204068 1.215850

C -3.258298 -1.835766 -1.837886

C -3.486862 -0.914898 -2.862628

C -2.794227 -3.109367 -2.174298

C -3.240879 -1.251329 -4.190943

H -3.873252 0.074571 -2.636789

C -2.543786 -3.446090 -3.500937

H -2.631984 -3.838579 -1.389128

C -2.763361 -2.517048 -4.514679

H -3.422685 -0.519382 -4.971350

H -2.177783 -4.439457 -3.741463

H -2.568222 -2.778597 -5.549895

C 4.192107 -2.274977 -0.034143

C 5.312848 -1.452162 -0.159794

C 4.349097 -3.552067 0.503300

C 6.569472 -1.902523 0.229204

H 5.205079 -0.446522 -0.553524

C 5.603462 -3.995664 0.910375

H 3.483470 -4.194798 0.613285

C 6.719342 -3.175559 0.770023

H 7.428791 -1.247428 0.125833

H 5.708737 -4.988071 1.337603

H 7.697755 -3.525226 1.084173

|   |           |           |           |   |           |           |           |
|---|-----------|-----------|-----------|---|-----------|-----------|-----------|
| C | 2.592518  | -1.950081 | -1.985783 | H | -0.673281 | 3.911531  | 3.727669  |
| C | 1.329034  | -2.300744 | -2.469314 | C | -0.696768 | 2.727491  | 0.274223  |
| C | 3.598028  | -1.656832 | -2.908030 | H | -0.715665 | 1.941158  | -0.525586 |
| C | 1.071022  | -2.335147 | -3.835510 | H | -1.738155 | 2.994259  | 0.481789  |
| H | 0.523642  | -2.533682 | -1.782808 | C | 0.058964  | 3.899295  | -0.345294 |
| C | 3.342233  | -1.691784 | -4.274258 | H | 1.088013  | 3.591680  | -0.562611 |
| H | 4.591241  | -1.393295 | -2.564320 | H | 0.120082  | 4.747461  | 0.349270  |
| C | 2.076501  | -2.026080 | -4.745050 | C | -0.589106 | 4.367028  | -1.648216 |
| H | 0.074638  | -2.594362 | -4.179503 | H | -1.628873 | 4.667659  | -1.457967 |
| H | 4.138176  | -1.453329 | -4.972636 | H | -0.636479 | 3.517694  | -2.343736 |
| H | 1.877697  | -2.049369 | -5.811941 | C | 0.164614  | 5.516104  | -2.314121 |
| C | 0.014449  | 2.721028  | 2.078361  | H | 0.161840  | 6.390345  | -1.648468 |
| C | 0.372938  | 1.505857  | 2.897124  | H | 1.217716  | 5.229057  | -2.436688 |
| C | 1.514852  | 3.102410  | 2.191883  | C | -0.413006 | 5.908698  | -3.673255 |
| H | 1.693734  | 4.046107  | 2.720259  | H | -1.470346 | 6.177706  | -3.552621 |
| H | 2.084006  | 3.085516  | 1.257365  | H | -0.395892 | 5.032431  | -4.335362 |
| N | 1.735201  | 1.926887  | 3.036338  | C | 0.337741  | 7.062333  | -4.334947 |
| O | -0.248700 | 0.698658  | 3.609490  | H | 0.307827  | 7.960610  | -3.708895 |
| C | 2.867792  | 1.135462  | 3.103794  | H | -0.094558 | 7.317277  | -5.307074 |
| C | 4.120072  | 1.640010  | 2.727016  | H | 1.391212  | 6.806539  | -4.493199 |
| C | 2.768934  | -0.200566 | 3.529951  | H | 3.188804  | -0.119505 | 0.880775  |
| C | 5.239125  | 0.810433  | 2.735398  | C | 2.553640  | 0.798112  | -0.929141 |
| H | 4.210388  | 2.677628  | 2.419823  | C | 3.602730  | 1.714203  | -0.862594 |
| C | 3.892689  | -1.014566 | 3.521239  | C | 1.591896  | 0.946993  | -1.933516 |
| H | 1.801298  | -0.572722 | 3.843500  | C | 3.716976  | 2.737142  | -1.803440 |
| C | 5.134817  | -0.522494 | 3.120283  | H | 4.327715  | 1.632779  | -0.057071 |
| H | 6.200591  | 1.214268  | 2.430132  | C | 1.709190  | 1.957559  | -2.878218 |
| H | 3.797302  | -2.052997 | 3.825095  | H | 0.753000  | 0.261435  | -1.979230 |
| H | 6.001903  | -1.173264 | 3.099706  | C | 2.777585  | 2.851918  | -2.821866 |
| C | -1.005448 | 3.650039  | 2.715747  | H | 4.539133  | 3.442864  | -1.737091 |
| H | -1.971377 | 3.147025  | 2.800932  | H | 0.963165  | 2.049436  | -3.661282 |
| H | -1.147429 | 4.579736  | 2.154876  | H | 2.867687  | 3.639039  | -3.564259 |

H -2.928486 0.557740 -0.900377  
C -3.735615 0.698095 1.058433  
C -4.910539 1.361274 0.696117  
C -3.310327 0.738503 2.385119  
C -5.666582 2.033350 1.647652  
H -5.247916 1.331339 -0.337299  
C -4.065983 1.420128 3.337638  
H -2.366420 0.292436 2.683344  
C -5.245415 2.061875 2.976156  
H -6.582230 2.536712 1.353510  
H -3.711158 1.456857 4.362873  
H -5.830977 2.591493 3.721333

**<sup>3</sup>TS10-R**

B3LYP/BSI SCF energy: -2922.064527a.u.

M06/BSII SCF energy in solution: -2920.73421a.u.

M06/BSII free energy in solution: -2919.771554a.u.

C 0.639579 -0.739596 -1.824695  
N 1.076286 -0.451492 -0.634115  
O 1.296230 -1.741838 -2.470643  
C 2.111852 -2.431227 -1.471154  
C 2.250399 -1.298971 -0.360578  
C -1.643989 0.133561 -1.594173  
N -1.562183 0.469809 -0.347815  
O -2.885006 -0.025553 -2.103959  
C -3.840684 0.494462 -1.106033  
C -2.929178 0.525280 0.200084  
Ni 0.207063 0.829093 0.583495  
C -0.487762 -0.047069 -2.562485  
C -0.927484 -0.878022 -3.786253  
H -0.090230 -0.987216 -4.478219

H -1.265652 -1.876422 -3.497772  
H -1.746155 -0.371650 -4.299317  
C -0.025595 1.366202 -3.040912  
H -0.832742 1.836499 -3.610696  
H 0.213742 2.013421 -2.195443  
H 0.848145 1.264252 -3.693388  
C -4.229878 1.898493 -1.593305  
C -5.373641 2.084116 -2.385741  
C -3.395424 3.003176 -1.350885  
C -5.693404 3.341345 -2.897913  
H -6.021502 1.242431 -2.602881  
C -3.717667 4.259028 -1.869139  
H -2.471337 2.915394 -0.786764  
C -4.868530 4.436687 -2.636870  
H -6.588062 3.461613 -3.502599  
H -3.053250 5.094221 -1.667957  
H -5.118069 5.416925 -3.033626  
C -5.021302 -0.461072 -1.024620  
C -6.110675 -0.138862 -0.201051  
C -5.050686 -1.662581 -1.739027  
C -7.197803 -1.002613 -0.088466  
H -6.111801 0.798902 0.346495  
C -6.143728 -2.526420 -1.629478  
H -4.220225 -1.918155 -2.386024  
C -7.218774 -2.202520 -0.803713  
H -8.030649 -0.736559 0.556168  
H -6.151171 -3.453793 -2.195437  
H -8.067649 -2.874868 -0.718984  
C 3.408879 -2.864720 -2.150557  
C 4.134140 -3.971514 -1.691378  
C 3.912529 -2.135065 -3.236459  
C 5.339784 -4.332930 -2.294569

|   |           |           |           |   |           |           |           |
|---|-----------|-----------|-----------|---|-----------|-----------|-----------|
| H | 3.754211  | -4.565471 | -0.867379 | C | 4.719841  | 5.583502  | -1.180886 |
| C | 5.112889  | -2.501826 | -3.843349 | H | 5.863193  | 5.362716  | 0.636044  |
| H | 3.356904  | -1.283865 | -3.610525 | H | 3.317624  | 5.637886  | -2.820272 |
| C | 5.834038  | -3.600385 | -3.373404 | H | 5.480608  | 6.162124  | -1.695764 |
| H | 5.886306  | -5.195281 | -1.923428 | C | -0.873867 | 3.288916  | 2.743149  |
| H | 5.484117  | -1.925671 | -4.686083 | H | -1.851659 | 3.098235  | 2.291414  |
| H | 6.769244  | -3.885113 | -3.846812 | H | -0.928222 | 3.018398  | 3.802047  |
| C | 1.290277  | -3.630366 | -0.968372 | H | -0.691460 | 4.368617  | 2.674712  |
| C | 0.398585  | -4.264351 | -1.847031 | C | -0.131198 | 0.726271  | 2.791176  |
| C | 1.435914  | -4.155720 | 0.322521  | H | -0.027805 | -0.242963 | 2.270962  |
| C | -0.339480 | -5.374926 | -1.439662 | H | -1.187034 | 0.843877  | 3.029932  |
| H | 0.287285  | -3.879785 | -2.854393 | C | 0.748915  | 0.701146  | 4.033903  |
| C | 0.701654  | -5.272828 | 0.730076  | H | 1.787593  | 0.480967  | 3.754332  |
| H | 2.129756  | -3.707046 | 1.026630  | H | 0.767053  | 1.685663  | 4.522220  |
| C | -0.193186 | -5.883954 | -0.147454 | C | 0.292439  | -0.343864 | 5.069807  |
| H | -1.027342 | -5.846139 | -2.136052 | H | -0.748056 | -0.137078 | 5.355855  |
| H | 0.833041  | -5.661264 | 1.735930  | H | 0.285015  | -1.338952 | 4.603858  |
| H | -0.765660 | -6.751004 | 0.169001  | C | 1.172748  | -0.372906 | 6.326579  |
| C | 0.210639  | 2.534844  | 1.985630  | H | 1.181931  | 0.625785  | 6.786672  |
| C | 0.406494  | 3.052677  | 0.562306  | H | 2.213214  | -0.581702 | 6.037881  |
| C | 1.694033  | 2.942526  | 2.217813  | C | 0.722888  | -1.403846 | 7.369861  |
| H | 1.795515  | 3.802690  | 2.893616  | H | -0.316567 | -1.195740 | 7.658027  |
| H | 2.399143  | 2.164104  | 2.521441  | H | 0.715485  | -2.402418 | 6.911790  |
| N | 1.788272  | 3.322881  | 0.805999  | C | 1.606087  | -1.422131 | 8.621720  |
| O | -0.333673 | 3.497168  | -0.339091 | H | 1.605097  | -0.446468 | 9.121081  |
| C | 2.739027  | 4.081334  | 0.154642  | H | 1.260089  | -2.166523 | 9.346504  |
| C | 3.959424  | 4.392373  | 0.792881  | H | 2.645719  | -1.661539 | 8.370058  |
| C | 2.517570  | 4.548059  | -1.162007 | C | -3.154135 | -0.575766 | 1.223313  |
| C | 4.930338  | 5.134418  | 0.126476  | C | -3.840477 | -0.292848 | 2.410728  |
| H | 4.142756  | 4.041558  | 1.803991  | C | -2.673790 | -1.875943 | 1.018406  |
| C | 3.504349  | 5.284143  | -1.809164 | C | -4.057205 | -1.286919 | 3.367315  |
| H | 1.566111  | 4.340206  | -1.636135 | H | -4.208279 | 0.715064  | 2.588989  |

|   |           |           |           |    |           |           |           |
|---|-----------|-----------|-----------|----|-----------|-----------|-----------|
| C | -2.884455 | -2.870020 | 1.973447  | O  | -2.511470 | -2.549095 | 0.442391  |
| H | -2.123475 | -2.111071 | 0.112972  | C  | -3.530232 | -1.693659 | -0.172962 |
| C | -3.579942 | -2.579738 | 3.150435  | C  | -3.036806 | -0.254850 | 0.298447  |
| H | -4.592519 | -1.048262 | 4.282103  | Ni | -0.107093 | 0.857139  | 0.674840  |
| H | -2.500021 | -3.870557 | 1.796759  | C  | -0.155668 | -2.480972 | 1.105887  |
| H | -3.742862 | -3.354307 | 3.894452  | C  | -0.226004 | -3.980483 | 0.747644  |
| H | -3.075014 | 1.485983  | 0.699158  | H  | 0.701332  | -4.471948 | 1.045238  |
| H | 2.123048  | -1.754601 | 0.622767  | H  | -0.370502 | -4.136433 | -0.324569 |
| C | 3.554327  | -0.517112 | -0.334964 | H  | -1.058756 | -4.449202 | 1.274861  |
| C | 4.630208  | -1.014606 | 0.414269  | C  | 0.037099  | -2.327848 | 2.650876  |
| C | 3.717766  | 0.686034  | -1.030993 | H  | -0.798498 | -2.810032 | 3.169782  |
| C | 5.847936  | -0.336807 | 0.449939  | H  | 0.083574  | -1.276584 | 2.947371  |
| H | 4.516579  | -1.943489 | 0.968697  | H  | 0.962467  | -2.829653 | 2.951632  |
| C | 4.932556  | 1.373116  | -0.987872 | C  | -4.887539 | -2.150181 | 0.356816  |
| H | 2.884247  | 1.106936  | -1.582259 | C  | -6.053721 | -1.999484 | -0.404009 |
| C | 6.002147  | 0.860337  | -0.252888 | C  | -4.989705 | -2.709652 | 1.638373  |
| H | 6.672227  | -0.738873 | 1.032544  | C  | -7.293206 | -2.387732 | 0.107263  |
| H | 5.031100  | 2.319024  | -1.511005 | H  | -5.998976 | -1.588742 | -1.406267 |
| H | 6.945705  | 1.397135  | -0.216516 | C  | -6.226868 | -3.105083 | 2.144588  |

**<sup>3</sup>TS10-S**

B3LYP/BSI SCF energy: -2922.065909a.u.

M06/BSII SCF energy in solution: -2920.760588a.u.

M06/BSII free energy in solution: -2919.798559a.u.

|   |           |           |           |   |           |           |           |
|---|-----------|-----------|-----------|---|-----------|-----------|-----------|
| C | 1.018871  | -1.820098 | 0.411810  | C | -7.385242 | -2.943605 | 1.382774  |
| N | 1.170971  | -0.555348 | 0.189579  | H | -8.185184 | -2.262731 | -0.500066 |
| O | 2.061398  | -2.619925 | 0.086513  | H | -6.283795 | -3.540084 | 3.138326  |
| C | 3.109216  | -1.787500 | -0.531180 | H | -8.348692 | -3.251841 | 1.778406  |
| C | 2.562387  | -0.322985 | -0.241345 | C | -3.409899 | -1.876641 | -1.694343 |
| C | -1.430644 | -1.767416 | 0.693643  | C | -3.745025 | -0.864115 | -2.603472 |
| N | -1.614822 | -0.489632 | 0.600448  | C | -3.007563 | -3.120695 | -2.203446 |
|   |           |           |           | C | -3.664980 | -1.082339 | -3.981497 |
|   |           |           |           | H | -4.081471 | 0.106075  | -2.251316 |
|   |           |           |           | C | -2.922017 | -3.337448 | -3.577995 |
|   |           |           |           | H | -2.760362 | -3.919104 | -1.513182 |
|   |           |           |           | C | -3.248455 | -2.317953 | -4.474447 |

|   |           |           |           |   |           |           |           |
|---|-----------|-----------|-----------|---|-----------|-----------|-----------|
| H | -3.928441 | -0.281053 | -4.665874 | C | 2.976932  | 1.987069  | 2.786901  |
| H | -2.603966 | -4.307903 | -3.948655 | C | 4.070876  | 2.800190  | 2.405929  |
| H | -3.182455 | -2.486543 | -5.545310 | C | 3.206238  | 0.908622  | 3.676744  |
| C | 4.413070  | -2.166797 | 0.178985  | C | 5.347406  | 2.532943  | 2.895069  |
| C | 5.210616  | -1.272288 | 0.898450  | H | 3.909420  | 3.639116  | 1.735314  |
| C | 4.815006  | -3.512165 | 0.105394  | C | 4.489648  | 0.663415  | 4.150624  |
| C | 6.381427  | -1.709207 | 1.527537  | H | 2.360871  | 0.308769  | 3.991893  |
| H | 4.942168  | -0.227947 | 0.999997  | C | 5.575015  | 1.463291  | 3.767773  |
| C | 5.973556  | -3.949281 | 0.739425  | H | 6.172542  | 3.174651  | 2.595416  |
| H | 4.207653  | -4.217077 | -0.453726 | H | 4.645606  | -0.164396 | 4.837846  |
| C | 6.766166  | -3.044904 | 1.452950  | H | 6.570517  | 1.267852  | 4.154575  |
| H | 6.975849  | -0.992939 | 2.086205  | C | -1.321559 | 3.623714  | 2.473438  |
| H | 6.260508  | -4.995076 | 0.675208  | H | -2.171745 | 2.982768  | 2.718309  |
| H | 7.672968  | -3.382760 | 1.946472  | H | -1.684674 | 4.467509  | 1.878505  |
| C | 3.177928  | -2.136769 | -2.020104 | H | -0.924886 | 4.017757  | 3.417774  |
| C | 2.143422  | -2.825241 | -2.662848 | C | -1.141675 | 2.728546  | -0.052136 |
| C | 4.292429  | -1.738758 | -2.773025 | H | -1.059318 | 1.877715  | -0.753088 |
| C | 2.217566  | -3.103828 | -4.030238 | H | -2.173370 | 2.780895  | 0.295454  |
| H | 1.282133  | -3.156125 | -2.094802 | C | -0.696594 | 3.985504  | -0.785565 |
| C | 4.363477  | -2.011991 | -4.137260 | H | 0.307789  | 3.835389  | -1.200922 |
| H | 5.108546  | -1.213500 | -2.287314 | H | -0.622351 | 4.837347  | -0.094808 |
| C | 3.324989  | -2.696819 | -4.772765 | C | -1.643896 | 4.374862  | -1.936761 |
| H | 1.405861  | -3.642908 | -4.510674 | H | -2.653552 | 4.539154  | -1.534314 |
| H | 5.234287  | -1.693897 | -4.703286 | H | -1.727143 | 3.530124  | -2.635215 |
| H | 3.382792  | -2.914764 | -5.835329 | C | -1.191207 | 5.623998  | -2.705053 |
| C | -0.246485 | 2.818914  | 1.767222  | H | -1.103954 | 6.469494  | -2.007549 |
| C | 0.397916  | 1.732747  | 2.603306  | H | -0.181062 | 5.455899  | -3.105459 |
| C | 1.179166  | 3.409556  | 1.598799  | C | -2.131880 | 6.011926  | -3.853184 |
| H | 1.322261  | 4.330215  | 2.181693  | H | -3.140111 | 6.183731  | -3.452024 |
| H | 1.561852  | 3.561086  | 0.585553  | H | -2.222712 | 5.164760  | -4.546991 |
| N | 1.718063  | 2.228720  | 2.285936  | C | -1.669983 | 7.254003  | -4.622274 |
| O | 0.039578  | 0.956838  | 3.514831  | H | -1.601391 | 8.126103  | -3.961921 |

|   |           |           |           |    |           |           |           |
|---|-----------|-----------|-----------|----|-----------|-----------|-----------|
| H | -2.361972 | 7.505071  | -5.433030 | C  | 1.186511  | -2.108130 | -0.739436 |
| H | -0.679757 | 7.099362  | -5.066188 | N  | 1.405960  | -0.994988 | -0.138512 |
| H | 3.082663  | 0.078751  | 0.631661  | O  | 2.272572  | -2.773449 | -1.206860 |
| C | 2.669974  | 0.709751  | -1.347351 | C  | 3.466050  | -2.124921 | -0.649320 |
| C | 3.692231  | 1.666013  | -1.301949 | C  | 2.858972  | -0.730623 | -0.178327 |
| C | 1.752951  | 0.751175  | -2.407539 | C  | -1.334920 | -2.096459 | -0.469761 |
| C | 3.808339  | 2.635336  | -2.301414 | N  | -1.377668 | -1.064885 | 0.288146  |
| H | 4.391125  | 1.667176  | -0.469929 | O  | -2.521075 | -2.662828 | -0.805085 |
| C | 1.866088  | 1.720215  | -3.404346 | C  | -3.562218 | -1.670538 | -0.440017 |
| H | 0.951584  | 0.021391  | -2.450836 | C  | -2.801150 | -0.830396 | 0.650307  |
| C | 2.895733  | 2.664205  | -3.356173 | Ni | 0.097300  | 0.176796  | 0.735294  |
| H | 4.606852  | 3.370099  | -2.249287 | C  | -0.126764 | -2.798691 | -1.055970 |
| H | 1.150510  | 1.736448  | -4.221592 | C  | -0.282910 | -2.847781 | -2.602862 |
| H | 2.982510  | 3.417696  | -4.133957 | H  | 0.557432  | -3.388221 | -3.043754 |
| H | -3.099139 | 0.434494  | -0.545694 | H  | -0.317483 | -1.839142 | -3.024622 |
| C | -3.789601 | 0.378005  | 1.460416  | H  | -1.212693 | -3.356790 | -2.861688 |
| C | -5.001950 | 1.035302  | 1.203104  | C  | -0.088187 | -4.245825 | -0.490724 |
| C | -3.309206 | 0.335620  | 2.774203  | H  | -1.027373 | -4.752923 | -0.720860 |
| C | -5.733420 | 1.615779  | 2.237365  | H  | 0.051505  | -4.239052 | 0.594068  |
| H | -5.381464 | 1.087097  | 0.185362  | H  | 0.733702  | -4.802851 | -0.943591 |
| C | -4.040862 | 0.922834  | 3.810619  | C  | -4.799912 | -2.403559 | 0.047245  |
| H | -2.341458 | -0.102886 | 2.989650  | C  | -5.928613 | -1.650159 | 0.401475  |
| C | -5.255167 | 1.557164  | 3.548829  | C  | -4.856884 | -3.796897 | 0.146969  |
| H | -6.671926 | 2.117793  | 2.019413  | C  | -7.083924 | -2.278665 | 0.859724  |
| H | -3.645782 | 0.892850  | 4.821864  | H  | -5.902222 | -0.567746 | 0.314130  |
| H | -5.820295 | 2.013407  | 4.356704  | C  | -6.019922 | -4.426499 | 0.599038  |
|   |           |           |           | H  | -3.992499 | -4.388398 | -0.131447 |
|   |           |           |           | C  | -7.134688 | -3.671561 | 0.959780  |
|   |           |           |           | H  | -7.947065 | -1.679895 | 1.135827  |
|   |           |           |           | H  | -6.049780 | -5.510415 | 0.667835  |
|   |           |           |           | H  | -8.037282 | -4.161600 | 1.313223  |
|   |           |           |           | C  | -3.844510 | -0.894549 | -1.738529 |

**<sup>1</sup>TS10-R'**

B3LYP/BSI SCF energy: -2922.079057a.u.

M06/BSII SCF energy in solution: -2920.7621011a.u.

M06/BSII free energy in solution: -2919.800417a.u.

|   |           |           |           |   |           |           |           |
|---|-----------|-----------|-----------|---|-----------|-----------|-----------|
| C | -3.438388 | 0.428237  | -1.958057 | C | -0.767124 | 3.548578  | 1.982864  |
| C | -4.481166 | -1.584610 | -2.784692 | C | -1.853610 | 3.318192  | 1.028572  |
| C | -3.666849 | 1.041691  | -3.195502 | C | -0.432520 | 4.829820  | 1.193161  |
| H | -2.955475 | 1.011231  | -1.181448 | H | 0.563375  | 4.876196  | 0.736798  |
| C | -4.704913 | -0.973502 | -4.015090 | H | -0.648798 | 5.781002  | 1.699760  |
| H | -4.805514 | -2.608627 | -2.626911 | N | -1.489801 | 4.429383  | 0.244147  |
| C | -4.296758 | 0.346713  | -4.225309 | O | -2.726986 | 2.464422  | 0.840447  |
| H | -3.347905 | 2.069795  | -3.339226 | C | -1.958190 | 5.004718  | -0.924699 |
| H | -5.201980 | -1.525569 | -4.807992 | C | -1.306665 | 6.122855  | -1.478599 |
| H | -4.473950 | 0.828186  | -5.183015 | C | -3.108486 | 4.493876  | -1.563254 |
| C | 3.935981  | -2.993908 | 0.527385  | C | -1.789794 | 6.706622  | -2.648130 |
| C | 4.562032  | -2.457207 | 1.659586  | H | -0.425716 | 6.527435  | -0.989483 |
| C | 3.797556  | -4.387505 | 0.440946  | C | -3.575038 | 5.093203  | -2.729947 |
| C | 5.020812  | -3.287636 | 2.685788  | H | -3.619362 | 3.647127  | -1.120923 |
| H | 4.707904  | -1.386240 | 1.757831  | C | -2.923572 | 6.199019  | -3.286027 |
| C | 4.248329  | -5.215938 | 1.466784  | H | -1.273081 | 7.568747  | -3.061959 |
| H | 3.331799  | -4.820161 | -0.437245 | H | -4.467699 | 4.694514  | -3.205653 |
| C | 4.860850  | -4.669034 | 2.596394  | H | -3.297130 | 6.659928  | -4.195343 |
| H | 5.499088  | -2.847317 | 3.555774  | C | -0.939388 | 3.479174  | 3.473347  |
| H | 4.123941  | -6.291700 | 1.381322  | H | -1.670278 | 4.213452  | 3.844638  |
| H | 5.211760  | -5.314025 | 3.396512  | H | -0.001039 | 3.662906  | 4.007830  |
| C | 4.517215  | -2.054183 | -1.755228 | H | -1.300806 | 2.487194  | 3.769256  |
| C | 4.137080  | -2.045218 | -3.103941 | H | 3.180019  | -0.528124 | 0.842763  |
| C | 5.880102  | -1.966945 | -1.442129 | C | 3.196018  | 0.490200  | -1.017405 |
| C | 5.096210  | -1.951581 | -4.112353 | C | 4.320757  | 1.255240  | -0.684293 |
| H | 3.088827  | -2.121362 | -3.366909 | C | 2.420246  | 0.878284  | -2.115937 |
| C | 6.837851  | -1.864123 | -2.451192 | C | 4.670355  | 2.377718  | -1.435694 |
| H | 6.201274  | -1.991724 | -0.406395 | H | 4.928363  | 0.974921  | 0.172863  |
| C | 6.450712  | -1.858016 | -3.791275 | C | 2.764149  | 2.003495  | -2.866260 |
| H | 4.780840  | -1.952379 | -5.151874 | H | 1.528968  | 0.315602  | -2.372305 |
| H | 7.889136  | -1.798137 | -2.185962 | C | 3.891166  | 2.755418  | -2.530455 |
| H | 7.196678  | -1.785228 | -4.577287 | H | 5.545939  | 2.959173  | -1.161413 |



H 2.145090 2.296265 -3.709387  
H 4.156175 3.632892 -3.113120  
H -3.008193 0.231393 0.538858  
C -3.040448 -1.178003 2.111118  
C -3.518665 -0.179477 2.969090  
C -2.766157 -2.448447 2.635641  
C -3.734577 -0.451529 4.322376  
H -3.691238 0.817701 2.573425  
C -2.980690 -2.719715 3.985943  
H -2.388577 -3.233359 1.987388  
C -3.468720 -1.721753 4.833610  
H -4.104429 0.333285 4.976427  
H -2.768102 -3.710734 4.377475  
H -3.635380 -1.934187 5.886016  
C 0.608024 1.952208 1.414309  
H 0.717162 2.448033 0.452108  
H -0.367679 1.420122 1.724806  
C 1.738018 2.067978 2.423249  
H 2.451043 1.244150 2.262363  
H 1.348261 1.903634 3.435925  
C 2.544935 3.377079 2.391260  
H 1.903598 4.222396 2.667396  
H 2.879066 3.565377 1.361300  
C 3.767281 3.348280 3.318179  
H 3.440618 3.146236 4.348842  
H 4.415074 2.504262 3.037618  
C 4.590755 4.642365 3.295483  
H 3.947844 5.484885 3.584559  
H 4.911928 4.847705 2.265023  
C 5.816534 4.597524 4.213723  
H 5.524271 4.427444 5.256383  
H 6.382336 5.534418 4.176075

H 6.496680 3.786849 3.927078

**<sup>3</sup>TS10-S'**

B3LYP/BSI SCF energy: -2922.074063a.u.

M06/BSII SCF energy in solution: -2920.756264a.u.

M06/BSII free energy in solution: -2919.793954a.u.

C 2.126668 -1.710040 -0.303412  
N 1.875241 -0.451539 -0.214619  
O 3.411265 -2.087838 -0.094537  
C 4.110634 -0.940001 0.498159  
C 3.150933 0.247124 0.056260  
C -0.253033 -2.524133 -0.392768  
N -0.749218 -1.387301 -0.085120  
O -1.116765 -3.565128 -0.491769  
C -2.473502 -2.966820 -0.492944  
C -2.193664 -1.583421 0.198863  
Ni 0.110813 0.367502 -0.381370  
C 1.194957 -2.845057 -0.705017  
C 1.324971 -3.054370 -2.243111  
H 2.355008 -3.318838 -2.498236  
H 1.042440 -2.147197 -2.783370  
H 0.665012 -3.865227 -2.560177  
C 1.594533 -4.148276 0.029721  
H 0.917000 -4.952586 -0.260950  
H 1.543040 -4.023447 1.114994  
H 2.614390 -4.430242 -0.236081  
C -3.425072 -3.900950 0.238893  
C -4.777805 -3.543944 0.334375  
C -3.001478 -5.108320 0.802929  
C -5.683318 -4.371879 0.993419  
H -5.124110 -2.616656 -0.112509

|   |           |           |           |   |           |           |           |
|---|-----------|-----------|-----------|---|-----------|-----------|-----------|
| C | -3.913141 | -5.941090 | 1.457175  | H | 5.034569  | -2.029208 | -1.844317 |
| H | -1.959362 | -5.396826 | 0.731106  | C | 7.842525  | -0.190001 | 0.078293  |
| C | -5.254597 | -5.576186 | 1.557445  | H | 6.361848  | 0.197907  | 1.582100  |
| H | -6.726426 | -4.077293 | 1.063221  | C | 8.122781  | -0.789859 | -1.149671 |
| H | -3.568756 | -6.876958 | 1.888556  | H | 7.310710  | -1.928103 | -2.790590 |
| H | -5.962065 | -6.223458 | 2.067583  | H | 8.627033  | 0.322335  | 0.627759  |
| C | -2.880904 | -2.840041 | -1.972518 | H | 9.125462  | -0.746461 | -1.564783 |
| C | -3.441594 | -1.683637 | -2.529987 | C | -2.054346 | 2.809010  | -1.992716 |
| C | -2.708961 | -3.969269 | -2.791157 | C | -3.150177 | 2.402459  | -1.125932 |
| C | -3.810477 | -1.663318 | -3.880379 | C | -2.450007 | 4.267737  | -1.725551 |
| H | -3.598598 | -0.781457 | -1.946198 | H | -2.918926 | 4.798160  | -2.567069 |
| C | -3.071145 | -3.941925 | -4.134847 | H | -1.694414 | 4.918124  | -1.266675 |
| H | -2.289234 | -4.875017 | -2.364704 | N | -3.438205 | 3.737831  | -0.762590 |
| C | -3.625776 | -2.783617 | -4.686656 | O | -3.658505 | 1.343194  | -0.737033 |
| H | -4.241430 | -0.756581 | -4.294946 | C | -4.384751 | 4.363296  | 0.032628  |
| H | -2.927705 | -4.826180 | -4.749727 | C | -4.420384 | 5.767627  | 0.119231  |
| H | -3.913217 | -2.759301 | -5.733992 | C | -5.328681 | 3.605557  | 0.756278  |
| C | 4.114870  | -1.161144 | 2.019696  | C | -5.373771 | 6.395660  | 0.918106  |
| C | 4.071405  | -0.103477 | 2.936869  | H | -3.700214 | 6.358511  | -0.438750 |
| C | 4.232464  | -2.468532 | 2.515519  | C | -6.272884 | 4.252574  | 1.547669  |
| C | 4.126586  | -0.345728 | 4.312126  | H | -5.306776 | 2.525791  | 0.671536  |
| H | 3.999506  | 0.924540  | 2.596421  | C | -6.305932 | 5.647601  | 1.639922  |
| C | 4.281437  | -2.711227 | 3.886946  | H | -5.385876 | 7.481096  | 0.974500  |
| H | 4.282613  | -3.297537 | 1.818839  | H | -6.996328 | 3.656658  | 2.098425  |
| C | 4.226575  | -1.649835 | 4.792754  | H | -7.046801 | 6.141862  | 2.261002  |
| H | 4.085450  | 0.490576  | 5.003744  | C | -1.735134 | 2.218481  | -3.331465 |
| H | 4.366007  | -3.732237 | 4.248098  | H | -0.824707 | 2.657209  | -3.760577 |
| H | 4.263130  | -1.838217 | 5.861607  | H | -2.541617 | 2.361831  | -4.066992 |
| C | 5.526045  | -0.908415 | -0.072051 | H | -1.566425 | 1.138314  | -3.242014 |
| C | 5.816228  | -1.508138 | -1.304708 | H | 2.988834  | 0.916752  | 0.899551  |
| C | 6.556769  | -0.253969 | 0.615434  | C | 3.611939  | 1.086238  | -1.123977 |
| C | 7.104576  | -1.451680 | -1.836343 | C | 4.387409  | 2.227474  | -0.882390 |

C 3.301664 0.752587 -2.446943  
C 4.852361 3.013242 -1.936963  
H 4.629902 2.506193 0.140222  
C 3.760636 1.540054 -3.503982  
H 2.679588 -0.111414 -2.653012  
C 4.539257 2.670806 -3.253296  
H 5.451151 3.895331 -1.729322  
H 3.504587 1.270606 -4.524789  
H 4.894131 3.284021 -4.076524  
H -2.740127 -0.782029 -0.291951  
C -2.455423 -1.462567 1.691972  
C -3.306514 -0.446699 2.144350  
C -1.841735 -2.303324 2.630974  
C -3.549630 -0.283254 3.510535  
H -3.754320 0.229025 1.420814  
C -2.085923 -2.141076 3.993496  
H -1.175613 -3.094006 2.299156  
C -2.943166 -1.130567 4.437479  
H -4.207905 0.512858 3.846893  
H -1.607533 -2.803456 4.709751  
H -3.131343 -1.003727 5.500035  
C -0.182543 2.181946 -0.818036  
H 0.256238 2.462654 -1.770856  
H -1.048986 1.366897 -0.744560  
C -0.101405 3.209258 0.300794  
H 0.102161 2.702955 1.254881  
H -1.065193 3.715953 0.451688  
C 0.986101 4.263664 0.047660  
H 0.759143 4.797304 -0.886379  
H 1.947258 3.760006 -0.122194  
C 1.133293 5.276426 1.189935  
H 0.170114 5.779138 1.358482

H 1.359326 4.741195 2.123937  
C 2.217423 6.332199 0.938765  
H 1.989872 6.869108 0.007642  
H 3.179527 5.829177 0.768387  
C 2.362158 7.338344 2.085215  
H 1.424998 7.880298 2.256090  
H 3.140871 8.079286 1.875026  
H 2.625675 6.835713 3.023153

### 3-S

B3LYP/BSI SCF energy: -753.564757a.u.

M06/BSII SCF energy in solution: -753.190053a.u.

M06/BSII free energy in solution: -752.87812a.u.

C 0.067212 1.157324 0.502841  
C -1.219263 1.396007 -0.324184  
C -0.694154 -0.089354 1.070341  
H -0.921326 -0.053663 2.141654  
H -0.257116 -1.062311 0.818772  
N -1.834255 0.278146 0.216412  
O -1.587391 2.218898 -1.135436  
C -3.087229 -0.320463 0.039093  
C -3.412900 -1.481336 0.755528  
C -4.018516 0.238090 -0.853950  
C -4.660993 -2.078137 0.579077  
H -2.694100 -1.913203 1.445257  
C -5.259295 -0.372491 -1.016448  
H -3.753582 1.135247 -1.400605  
C -5.590260 -1.529753 -0.305558  
H -4.904562 -2.977132 1.138287  
H -5.975495 0.062895 -1.707666  
H -6.560771 -1.997438 -0.440146



H 6.32095300 -0.08704400 1.45116700  
H 5.71959600 -1.73497700 1.47042400  
C 7.32872900 -1.40513600 0.06425800  
H 7.72498900 -0.61575900 -0.5848170  
H 8.12139700 -1.68795800 0.76459000  
H 7.11730300 -2.27554100 -0.5674550

**<sup>1</sup>TS11-R**

B3LYP/BSI SCF energy: -2699.09813a.u.

M06/BSII SCF energy in solution: -2697.8970785a.u.

M06/BSII free energy in solution: -2697.102795a.u.

C -1.414220 -1.298553 1.055741  
N -1.509626 -0.626057 -0.030284  
O -2.566774 -1.652018 1.663351  
C -3.653949 -1.396979 0.683748  
C -2.944991 -0.367106 -0.282956  
H -3.155010 -0.620684 -1.321042  
C -3.279905 1.103654 -0.100763  
C -4.099969 1.735253 -1.043843  
C -2.793141 1.852566 0.978292  
C -4.445075 3.080533 -0.902360  
H -4.462185 1.171840 -1.899377  
C -3.131057 3.198044 1.119304  
H -2.138007 1.387616 1.708338  
C -3.963437 3.814615 0.182204  
H -5.083660 3.553547 -1.643031  
H -2.739459 3.767277 1.957063  
H -4.227075 4.862416 0.294184  
C 1.123288 -1.291316 1.137729  
N 1.330579 -0.633141 0.050934  
O 2.209800 -1.616730 1.867243

C 3.333939 -0.801279 1.358330  
C 2.799678 -0.438072 -0.083911  
H 2.988243 0.611366 -0.301762  
C 3.366977 -1.240745 -1.243092  
C 4.374724 -0.664117 -2.027871  
C 2.923407 -2.532170 -1.553528  
C 4.939791 -1.370774 -3.090541  
H 4.697835 0.351050 -1.814453  
C 3.481701 -3.235963 -2.621165  
H 2.127352 -2.987420 -0.972858  
C 4.494448 -2.659431 -3.389630  
H 5.719460 -0.909687 -3.690215  
H 3.120907 -4.233378 -2.855187  
H 4.926619 -3.207618 -4.221803  
Ni -0.026083 -0.319648 -1.368969  
C -0.168835 -1.801602 1.752568  
C -0.164674 -3.356090 1.673805  
H -1.075844 -3.748550 2.129207  
H -0.123753 -3.694407 0.634737  
H 0.700901 -3.749675 2.211090  
C -0.223134 -1.354996 3.239843  
H 0.641562 -1.746264 3.776513  
H -0.212635 -0.264312 3.323707  
H -1.135603 -1.734779 3.702402  
C 3.427035 0.381839 2.336471  
C 3.720112 0.077344 3.678368  
C 3.191320 1.715817 1.988091  
C 3.770412 1.076344 4.645119  
H 3.911814 -0.953611 3.959919  
C 3.243490 2.719344 2.963394  
H 2.979549 2.009665 0.966750  
C 3.529731 2.407282 4.289378

H 4.000191 0.818342 5.675127  
H 3.050783 3.747428 2.670798  
H 3.569043 3.190197 5.041484  
C 4.600514 -1.643770 1.384054  
C 5.843203 -1.010080 1.245240  
C 4.561297 -3.035349 1.519204  
C 7.020818 -1.755231 1.232402  
H 5.888905 0.071139 1.155936  
C 5.742954 -3.779626 1.517901  
H 3.606769 -3.535823 1.632323  
C 6.975435 -3.144120 1.371746  
H 7.975050 -1.248560 1.120772  
H 5.695931 -4.859086 1.630666  
H 7.893662 -3.724223 1.369152  
C -4.863186 -0.849607 1.423078  
C -6.070646 -0.699243 0.725512  
C -4.809060 -0.475780 2.769324  
C -7.195683 -0.176384 1.359276  
H -6.131692 -1.001991 -0.315682  
C -5.940654 0.040271 3.406104  
H -3.884244 -0.593914 3.321557  
C -7.135353 0.194678 2.704727  
H -8.121619 -0.063991 0.802772  
H -5.883428 0.320838 4.454050  
H -8.013763 0.597093 3.200793  
C -3.933261 -2.762455 0.036635  
C -4.686255 -3.702938 0.760180  
C -3.389099 -3.146622 -1.197590  
C -4.901028 -4.985234 0.260868  
H -5.109698 -3.423712 1.719550  
C -3.609669 -4.433828 -1.697960  
H -2.787782 -2.466573 -1.792240

C -4.364956 -5.355143 -0.975201  
H -5.490748 -5.694035 0.835387  
H -3.184685 -4.705652 -2.659711  
H -4.537051 -6.352607 -1.369663  
C 1.209780 1.961092 -2.842149  
C 1.893124 2.674037 -1.753828  
C 0.035325 2.929294 -2.701148  
H -0.109821 3.614029 -3.548082  
H -0.921647 2.496284 -2.400518  
N 0.807690 3.543855 -1.590030  
O 2.980729 2.626434 -1.179800  
C 0.603281 4.702803 -0.851640  
C -0.633313 5.367214 -0.921366  
C 1.632142 5.226671 -0.043035  
C -0.835544 6.535636 -0.189802  
H -1.430364 4.958926 -1.533842  
C 1.408218 6.394341 0.681059  
H 2.588270 4.718132 -0.012820  
C 0.178690 7.056939 0.616106  
H -1.795307 7.041191 -0.252057  
H 2.208435 6.796615 1.296573  
H 0.015839 7.968806 1.182497  
C 1.782631 1.319297 -4.052190  
H 2.660044 0.719740 -3.796681  
H 1.048931 0.680489 -4.548679  
H 2.105288 2.090183 -4.772553  
Br -1.210592 -0.592269 -3.449201

**<sup>3</sup>TS11-R**

B3LYP/BSI SCF energy: -2699.099879a.u.

M06/BSII SCF energy in solution: -2697.895771a.u.

M06/BSII free energy in solution: -2697.103554a.u.

|   |           |           |           |    |           |           |           |
|---|-----------|-----------|-----------|----|-----------|-----------|-----------|
| C | -1.455556 | -1.233746 | 1.106394  | H  | 5.452779  | -0.965740 | -3.864073 |
| N | -1.532824 | -0.619226 | -0.015559 | H  | 3.302749  | -4.462880 | -2.581635 |
| O | -2.616773 | -1.514163 | 1.732364  | H  | 4.877422  | -3.367352 | -4.162698 |
| C | -3.700685 | -1.274965 | 0.743694  | Ni | -0.057122 | -0.584719 | -1.394806 |
| C | -2.957456 | -0.334230 | -0.289365 | C  | -0.223741 | -1.751193 | 1.821714  |
| H | -3.172852 | -0.653624 | -1.308428 | C  | -0.261611 | -3.306665 | 1.777089  |
| C | -3.251700 | 1.154319  | -0.212512 | H  | -1.181882 | -3.665281 | 2.242395  |
| C | -4.072546 | 1.734631  | -1.187539 | H  | -0.229750 | -3.667704 | 0.745459  |
| C | -2.728780 | 1.968536  | 0.800125  | H  | 0.593676  | -3.710967 | 2.323420  |
| C | -4.384593 | 3.094398  | -1.140863 | C  | -0.270137 | -1.269019 | 3.297071  |
| H | -4.464349 | 1.118691  | -1.992582 | H  | 0.581377  | -1.671785 | 3.846054  |
| C | -3.034018 | 3.328471  | 0.846560  | H  | -0.228333 | -0.177441 | 3.356432  |
| H | -2.069723 | 1.543932  | 1.550956  | H  | -1.194439 | -1.611702 | 3.764823  |
| C | -3.868878 | 3.894096  | -0.120132 | C  | 3.444976  | 0.434454  | 2.285419  |
| H | -5.024419 | 3.526878  | -1.904804 | C  | 3.786763  | 0.204683  | 3.630715  |
| H | -2.613780 | 3.948535  | 1.632618  | C  | 3.199744  | 1.747999  | 1.871943  |
| H | -4.108607 | 4.952884  | -0.080788 | C  | 3.874460  | 1.255639  | 4.537671  |
| C | 1.081876  | -1.289277 | 1.194004  | H  | 3.986770  | -0.809351 | 3.963005  |
| N | 1.299178  | -0.728661 | 0.057423  | C  | 3.289525  | 2.804061  | 2.787130  |
| O | 2.158288  | -1.547126 | 1.960985  | H  | 2.954388  | 1.987307  | 0.843652  |
| C | 3.300298  | -0.802803 | 1.383108  | C  | 3.623159  | 2.565376  | 4.117251  |
| C | 2.764232  | -0.513243 | -0.078160 | H  | 4.141244  | 1.054254  | 5.571383  |
| H | 2.929123  | 0.531228  | -0.336748 | H  | 3.086326  | 3.814408  | 2.444846  |
| C | 3.342262  | -1.342067 | -1.212541 | H  | 3.690939  | 3.388968  | 4.822441  |
| C | 4.219302  | -0.727395 | -2.116013 | C  | 4.541430  | -1.680450 | 1.450923  |
| C | 3.018001  | -2.692774 | -1.393374 | C  | 5.787947  | -1.111576 | 1.153247  |
| C | 4.775295  | -1.455150 | -3.170056 | C  | 4.478919  | -3.034396 | 1.793741  |
| H | 4.441882  | 0.330201  | -2.002509 | C  | 6.945241  | -1.886304 | 1.185071  |
| C | 3.567962  | -3.417898 | -2.449872 | H  | 5.851755  | -0.056827 | 0.902762  |
| H | 2.326048  | -3.181248 | -0.714058 | C  | 5.641963  | -3.807622 | 1.835683  |
| C | 4.451707  | -2.802032 | -3.338693 | H  | 3.522188  | -3.482387 | 2.035427  |
|   |           |           |           | C  | 6.876911  | -3.238815 | 1.528277  |

|   |           |           |           |                                   |                 |           |           |
|---|-----------|-----------|-----------|-----------------------------------|-----------------|-----------|-----------|
| H | 7.902312  | -1.431213 | 0.947255  | C                                 | 0.750660        | 4.745461  | -0.882288 |
| H | 5.577757  | -4.856855 | 2.109930  | C                                 | -0.450373       | 5.477052  | -0.878388 |
| H | 7.780146  | -3.841188 | 1.558983  | C                                 | 1.839978        | 5.193048  | -0.106413 |
| C | -4.879584 | -0.632455 | 1.455350  | C                                 | -0.558175       | 6.632197  | -0.106727 |
| C | -6.092177 | -0.491014 | 0.764953  | H                                 | -1.293267       | 5.130367  | -1.467028 |
| C | -4.789759 | -0.159383 | 2.768023  | C                                 | 1.710174        | 6.349186  | 0.657925  |
| C | -7.186879 | 0.120222  | 1.372335  | H                                 | 2.768833        | 4.636015  | -0.134032 |
| H | -6.181419 | -0.870250 | -0.248759 | C                                 | 0.515767        | 7.076318  | 0.667511  |
| C | -5.891156 | 0.445244  | 3.379092  | H                                 | -1.491013       | 7.189530  | -0.113298 |
| H | -3.860690 | -0.269186 | 3.314759  | H                                 | 2.557672        | 6.692291  | 1.245499  |
| C | -7.090874 | 0.590413  | 2.684289  | H                                 | 0.426285        | 7.978347  | 1.265055  |
| H | -8.117331 | 0.224110  | 0.821743  | C                                 | 1.597586        | 1.345798  | -4.213373 |
| H | -5.806392 | 0.802159  | 4.401611  | H                                 | 2.446251        | 0.696363  | -3.981664 |
| H | -7.945913 | 1.061836  | 3.159961  | H                                 | 0.791945        | 0.730857  | -4.622137 |
| C | -4.040297 | -2.664814 | 0.184434  | H                                 | 1.920879        | 2.049432  | -4.999215 |
| C | -4.825458 | -3.526014 | 0.970095  | Br                                | -1.137663       | -1.004215 | -3.486202 |
| C | -3.523030 | -3.148436 | -1.026256 |                                   |                 |           |           |
| C | -5.100285 | -4.825833 | 0.552436  | <b>1'</b>                         |                 |           |           |
| H | -5.226765 | -3.170810 | 1.913742  | B3LYP/BSI SCF energy:             | -517.010513a.u. |           |           |
| C | -3.803918 | -4.452966 | -1.444754 | M06/BSII SCF energy in solution:  | -516.781316a.u. |           |           |
| H | -2.895211 | -2.536572 | -1.666025 | M06/BSII free energy in solution: | -516.643155a.u. |           |           |
| C | -4.592707 | -5.293863 | -0.662257 |                                   |                 |           |           |
| H | -5.714274 | -5.471578 | 1.173918  | C                                 | 2.625412        | -0.312418 | 0.000298  |
| H | -3.397997 | -4.801741 | -2.389727 | C                                 | 1.631550        | 0.765468  | 0.000408  |
| H | -4.811450 | -6.305089 | -0.993430 | C                                 | 1.512158        | -1.344678 | 0.000439  |
| C | 1.157957  | 2.081949  | -3.006718 | H                                 | 1.434459        | -1.977107 | -0.895013 |
| C | 1.902898  | 2.685594  | -1.907141 | H                                 | 1.434856        | -1.977188 | 0.895892  |
| C | 0.028319  | 3.077857  | -2.770819 | N                                 | 0.586453        | -0.190791 | 0.000745  |
| H | -0.131473 | 3.813864  | -3.571274 | O                                 | 1.616977        | 1.983189  | 0.000179  |
| H | -0.930662 | 2.660080  | -2.449976 | C                                 | -0.798843       | -0.119214 | 0.000321  |
| N | 0.863783  | 3.602779  | -1.660264 | C                                 | -1.566099       | -1.297138 | 0.000151  |
| O | 2.996270  | 2.544788  | -1.356712 | C                                 | -1.440974       | 1.135348  | 0.000117  |



C -2.957296 -1.218981 -0.000254  
H -1.072722 -2.264373 0.000373  
C -2.830994 1.190116 -0.000316  
H -0.837656 2.035473 0.000262  
C -3.598763 0.020946 -0.000507  
H -3.541355 -2.134992 -0.000381  
H -3.320930 2.159776 -0.000492  
H -4.682928 0.076881 -0.000839  
C 4.099722 -0.368131 -0.001031  
H 4.514375 0.643487 -0.001570  
H 4.488681 -0.899773 0.879409  
H 4.486998 -0.900063 -0.882041

1:

B3LYP-D3BJ/BSI SCF energy in solution:

-517.066973a.u.

M06/BSII SCF energy in solution: -516.78143a.u.

M06/BSII free energy in solution: -516.643758a.u.

C 2.622938 -0.307474 -0.000045  
C 1.628945 0.765914 -0.000036  
C 1.513077 -1.341615 0.000049  
H 1.434838 -1.968243 -0.896740  
H 1.434922 -1.968187 0.896885  
N 0.586247 -0.184745 0.000054  
O 1.609403 1.989031 -0.000067  
C -0.794762 -0.114830 0.000031  
C -1.556025 -1.296979 -0.000023  
C -1.443235 1.136116 0.000065  
C -2.947213 -1.224310 -0.000054  
H -1.056906 -2.260638 -0.000047  
C -2.833819 1.185964 0.000032

H -0.845888 2.039866 0.000112  
C -3.595749 0.012903 -0.000024  
H -3.526551 -2.143153 -0.000098  
H -3.327973 2.153385 0.000057  
H -4.680085 0.063332 -0.000045  
C 4.093047 -0.372777 0.000003  
H 4.524327 0.632101 -0.000087  
H 4.470551 -0.912403 0.880482  
H 4.470593 -0.912572 -0.880351

<sup>2</sup>[Ni<sup>I</sup>]Br

B3LYP/BSI SCF energy: -2182.075156a.u.

M06/BSII SCF energy in solution: -2181.101356a.u.

M06/BSII free energy in solution: -2180.472837a.u.

C 1.238082 0.296623 -0.994245  
N 1.376858 -0.020972 0.238891  
O 2.369327 0.413221 -1.727589  
C 3.451308 -0.195615 -0.907611  
C 2.828350 -0.074125 0.534094  
H 3.028505 -0.977333 1.109303  
C 3.247883 1.110345 1.388468  
C 3.926771 0.875759 2.589200  
C 2.957032 2.431964 1.024331  
C 4.320694 1.937985 3.404901  
H 4.128923 -0.145869 2.898423  
C 3.348441 3.494259 1.837385  
H 2.423583 2.636120 0.101001  
C 4.034063 3.250206 3.029869  
H 4.840022 1.736431 4.337190  
H 3.116991 4.513490 1.540950  
H 4.335277 4.078464 3.664882

|    |           |           |           |   |           |           |           |
|----|-----------|-----------|-----------|---|-----------|-----------|-----------|
| C  | -1.285746 | 0.457820  | -0.903876 | C | -4.313905 | 4.002760  | 1.667684  |
| N  | -1.426848 | -0.052339 | 0.263896  | H | -4.322003 | 1.888146  | 1.988568  |
| O  | -2.407116 | 0.928626  | -1.501016 | C | -4.058434 | 5.046692  | 0.780048  |
| C  | -3.479532 | 0.925665  | -0.499789 | H | -3.409642 | 5.558917  | -1.211866 |
| C  | -2.868015 | -0.020991 | 0.615200  | H | -4.665875 | 4.213466  | 2.673221  |
| H  | -2.949371 | 0.463805  | 1.587668  | H | -4.209838 | 6.076913  | 1.088202  |
| C  | -3.420729 | -1.427788 | 0.746129  | C | -4.761966 | 0.441162  | -1.174535 |
| C  | -4.007665 | -1.824339 | 1.952238  | C | -5.947478 | 0.353533  | -0.431339 |
| C  | -3.332863 | -2.355566 | -0.300899 | C | -4.791692 | 0.102556  | -2.531517 |
| C  | -4.506048 | -3.118767 | 2.111982  | C | -7.130173 | -0.076494 | -1.028417 |
| H  | -4.059794 | -1.122485 | 2.780918  | H | -5.951624 | 0.622218  | 0.619918  |
| C  | -3.830584 | -3.647123 | -0.144783 | C | -5.980131 | -0.322181 | -3.130812 |
| H  | -2.877997 | -2.068638 | -1.243964 | H | -3.886136 | 0.172289  | -3.121796 |
| C  | -4.419429 | -4.032382 | 1.062552  | C | -7.152300 | -0.415870 | -2.383100 |
| H  | -4.948957 | -3.412914 | 3.058772  | H | -8.036471 | -0.144141 | -0.433808 |
| H  | -3.756315 | -4.355843 | -0.964522 | H | -5.984048 | -0.579343 | -4.186302 |
| H  | -4.800861 | -5.041865 | 1.184864  | H | -8.075403 | -0.747790 | -2.849059 |
| Ni | -0.021387 | -0.782587 | 1.441052  | C | 4.735913  | 0.585012  | -1.120394 |
| C  | -0.041810 | 0.537080  | -1.771414 | C | 5.906560  | 0.132354  | -0.494382 |
| C  | -0.157307 | -0.561872 | -2.868281 | C | 4.792727  | 1.735541  | -1.912494 |
| H  | 0.720145  | -0.526862 | -3.516921 | C | 7.105284  | 0.824727  | -0.647864 |
| H  | -0.216330 | -1.555988 | -2.417134 | H | 5.879653  | -0.769202 | 0.110798  |
| H  | -1.052622 | -0.391038 | -3.470925 | C | 5.998061  | 2.424567  | -2.071998 |
| C  | 0.041959  | 1.934778  | -2.439248 | H | 3.895703  | 2.090270  | -2.406180 |
| H  | -0.831449 | 2.098168  | -3.072434 | C | 7.155857  | 1.974942  | -1.439472 |
| H  | 0.077930  | 2.729557  | -1.688482 | H | 8.001369  | 0.463389  | -0.151851 |
| H  | 0.940661  | 1.993041  | -3.055706 | H | 6.027137  | 3.315141  | -2.693497 |
| C  | -3.651542 | 2.375135  | -0.013684 | H | 8.091403  | 2.512634  | -1.562816 |
| C  | -3.412238 | 3.432437  | -0.903275 | C | 3.566726  | -1.646286 | -1.402828 |
| C  | -4.112144 | 2.678006  | 1.274105  | C | 4.235919  | -1.888477 | -2.614182 |
| C  | -3.607689 | 4.754970  | -0.508645 | C | 2.959143  | -2.727690 | -0.747344 |
| H  | -3.068938 | 3.215167  | -1.908227 | C | 4.306501  | -3.172048 | -3.150254 |

H 4.709224 -1.063244 -3.136445  
C 3.035138 -4.016174 -1.284882  
H 2.416020 -2.596086 0.182523  
C 3.707906 -4.244048 -2.483816  
H 4.834211 -3.335507 -4.085654  
H 2.563637 -4.838416 -0.754836  
H 3.768265 -5.247351 -2.895810  
Br 0.707735 -2.110318 3.245260

**<sup>1</sup>TS11-S**

B3LYP/BSI SCF energy: -2699.100631a.u.

M06/BSII SCF energy in solution: -2697.8994064a.u.

M06/BSII free energy in solution: -2697.105244a.u.

C 0.386534 2.096013 -0.322187  
N 0.898927 0.951004 -0.049598  
O 1.253431 3.111725 -0.534858  
C 2.594965 2.512152 -0.673702  
C 2.377148 1.121973 0.033111  
C -2.048633 1.390347 -0.181786  
N -1.814528 0.137897 -0.040332  
O -3.341482 1.781217 -0.127652  
C -4.100237 0.625491 0.419661  
C -3.120570 -0.557606 0.072373  
Ni -0.051291 -0.698546 0.476179  
C -1.067927 2.521269 -0.417971  
C -1.319207 3.628738 0.643816  
H -0.646987 4.469967 0.465874  
H -1.148966 3.247010 1.654589  
H -2.351715 3.974441 0.577700  
C -1.327597 3.091510 -1.841313  
H -2.361063 3.436513 -1.916573

H -1.152184 2.329786 -2.606400  
H -0.657033 3.930911 -2.031709  
C -5.457332 0.558333 -0.258411  
C -6.361998 -0.434285 0.146329  
C -5.837091 1.450752 -1.265248  
C -7.613841 -0.539565 -0.455133  
H -6.087453 -1.122442 0.940686  
C -7.096305 1.348206 -1.862958  
H -5.150250 2.228388 -1.577918  
C -7.986501 0.352799 -1.463727  
H -8.300558 -1.316913 -0.133047  
H -7.377949 2.051490 -2.641591  
H -8.964184 0.273155 -1.929935  
C -4.218587 0.896040 1.928310  
C -3.339277 0.340981 2.870762  
C -5.189741 1.808219 2.373193  
C -3.443862 0.681675 4.222709  
H -2.562245 -0.359800 2.582937  
C -5.289248 2.148397 3.720316  
H -5.875329 2.250150 1.657480  
C -4.416698 1.582249 4.652782  
H -2.757251 0.232557 4.934146  
H -6.051951 2.852020 4.041862  
H -4.497322 1.840549 5.704840  
C 2.864664 2.420441 -2.186701  
C 3.408518 1.292326 -2.812590  
C 2.594216 3.559271 -2.964612  
C 3.662589 1.306143 -4.189576  
H 3.635980 0.386321 -2.260463  
C 2.841930 3.565973 -4.334221  
H 2.191607 4.446713 -2.486781  
C 3.379593 2.434596 -4.954626

|   |          |           |           |    |           |           |           |
|---|----------|-----------|-----------|----|-----------|-----------|-----------|
| H | 4.083041 | 0.420276  | -4.656915 | C  | 0.546707  | -1.571927 | -2.778376 |
| H | 2.623006 | 4.456668  | -4.916546 | H  | 0.954984  | -0.559094 | -2.828322 |
| H | 3.578166 | 2.437894  | -6.022581 | H  | -0.535950 | -1.509250 | -2.633282 |
| C | 3.615886 | 3.435146  | -0.020353 | H  | 0.713202  | -2.045114 | -3.761173 |
| C | 3.243921 | 4.615103  | 0.630926  | H  | 2.838375  | 0.320075  | -0.539061 |
| C | 4.975013 | 3.098107  | -0.091609 | C  | 2.842939  | 0.982181  | 1.473807  |
| C | 4.213232 | 5.441409  | 1.205479  | C  | 3.809927  | 0.017799  | 1.781845  |
| H | 2.197252 | 4.889556  | 0.688857  | C  | 2.311952  | 1.766079  | 2.508085  |
| C | 5.938874 | 3.918437  | 0.489588  | C  | 4.246481  | -0.152413 | 3.097722  |
| H | 5.281207 | 2.193564  | -0.608617 | H  | 4.199983  | -0.615059 | 0.989915  |
| C | 5.561874 | 5.096119  | 1.139967  | C  | 2.747632  | 1.596458  | 3.820416  |
| H | 3.907850 | 6.356227  | 1.705661  | H  | 1.556352  | 2.515092  | 2.291047  |
| H | 6.986815 | 3.639253  | 0.430250  | C  | 3.718520  | 0.636732  | 4.118687  |
| H | 6.314427 | 5.737927  | 1.588655  | H  | 4.990551  | -0.910820 | 3.323168  |
| C | 1.202710 | -2.354680 | -1.703447 | H  | 2.328310  | 2.211484  | 4.611662  |
| C | 2.590110 | -2.404251 | -1.228625 | H  | 4.053415  | 0.501238  | 5.143115  |
| C | 1.025720 | -3.806049 | -1.270728 | H  | -3.062464 | -1.257082 | 0.905234  |
| H | 0.893400 | -4.528533 | -2.088648 | C  | -3.407903 | -1.365590 | -1.182177 |
| H | 0.302536 | -3.982972 | -0.470076 | C  | -3.669635 | -2.735476 | -1.064080 |
| N | 2.430170 | -3.723855 | -0.798905 | C  | -3.397985 | -0.788462 | -2.459915 |
| O | 3.572913 | -1.659847 | -1.196551 | C  | -3.928292 | -3.512479 | -2.195316 |
| C | 3.255655 | -4.657770 | -0.187643 | H  | -3.654109 | -3.198170 | -0.081327 |
| C | 2.738722 | -5.913474 | 0.175516  | C  | -3.654962 | -1.562451 | -3.590963 |
| C | 4.610309 | -4.360955 | 0.059974  | H  | -3.195260 | 0.271974  | -2.574419 |
| C | 3.566258 | -6.854599 | 0.783333  | C  | -3.922532 | -2.927774 | -3.461641 |
| H | 1.693194 | -6.139168 | -0.007817 | H  | -4.127251 | -4.574548 | -2.084508 |
| C | 5.419623 | -5.315380 | 0.668807  | H  | -3.647989 | -1.099497 | -4.573751 |
| H | 4.999433 | -3.393398 | -0.232858 | H  | -4.121882 | -3.530200 | -4.343287 |
| C | 4.909083 | -6.564609 | 1.034055  | Br | -0.518882 | -2.604691 | 1.833934  |
| H | 3.155154 | -7.819778 | 1.065328  |    |           |           |           |
| H | 6.463592 | -5.080407 | 0.857720  |    |           |           |           |
| H | 5.549589 | -7.301578 | 1.508881  |    |           |           |           |

<sup>3</sup>TS11-S

B3LYP/BSI SCF energy: -2699.103194a.u.

|                                                    |           |           |           |           |           |           |           |
|----------------------------------------------------|-----------|-----------|-----------|-----------|-----------|-----------|-----------|
| M06/BSII SCF energy in solution: -2697.898958a.u.  | H         | -7.387182 | -2.185669 | 2.426557  |           |           |           |
| M06/BSII free energy in solution: -2697.106517a.u. | H         | -8.931511 | -0.268880 | 2.072691  |           |           |           |
|                                                    | C         | -4.366644 | -0.401731 | -2.044705 |           |           |           |
| C                                                  | 0.253748  | -2.141389 | -0.022425 | C         | -3.507327 | 0.282821  | -2.917599 |
| N                                                  | 0.810881  | -0.992462 | -0.152387 | C         | -5.386211 | -1.196893 | -2.594394 |
| O                                                  | 1.074798  | -3.189978 | 0.206084  | C         | -3.676997 | 0.181537  | -4.301802 |
| C                                                  | 2.400183  | -2.632614 | 0.543411  | H         | -2.695517 | 0.902835  | -2.551469 |
| C                                                  | 2.285529  | -1.186952 | -0.073662 | C         | -5.550942 | -1.298135 | -3.973759 |
| C                                                  | -2.148432 | -1.339116 | -0.131800 | H         | -6.058156 | -1.736128 | -1.934586 |
| N                                                  | -1.862542 | -0.091252 | -0.066915 | C         | -4.696565 | -0.605015 | -4.834649 |
| O                                                  | -3.457306 | -1.663131 | -0.211087 | H         | -3.003256 | 0.726240  | -4.956499 |
| C                                                  | -4.180912 | -0.399992 | -0.519179 | H         | -6.349869 | -1.914918 | -4.375575 |
| C                                                  | -3.135665 | 0.666003  | -0.014159 | H         | -4.827268 | -0.677232 | -5.910624 |
| Ni                                                 | -0.085058 | 0.717581  | -0.575412 | C         | 2.494768  | -2.655274 | 2.080095  |
| C                                                  | -1.208830 | -2.528208 | -0.160827 | C         | 3.035060  | -1.607338 | 2.835421  |
| C                                                  | -1.382696 | -3.250146 | -1.529238 | C         | 2.070764  | -3.818339 | 2.744478  |
| H                                                  | -0.736114 | -4.129946 | -1.566286 | C         | 3.134265  | -1.722876 | 4.227209  |
| H                                                  | -1.123451 | -2.583794 | -2.356386 | H         | 3.377578  | -0.686379 | 2.374102  |
| H                                                  | -2.420653 | -3.566032 | -1.649876 | C         | 2.165340  | -3.925653 | 4.129323  |
| C                                                  | -1.600557 | -3.490846 | 0.991890  | H         | 1.667106  | -4.644102 | 2.167778  |
| H                                                  | -2.651178 | -3.770346 | 0.895636  | C         | 2.699652  | -2.874250 | 4.879177  |
| H                                                  | -1.447710 | -3.021049 | 1.967933  | H         | 3.554470  | -0.897941 | 4.795429  |
| H                                                  | -0.987463 | -4.391737 | 0.947187  | H         | 1.828732  | -4.833151 | 4.622871  |
| C                                                  | -5.507737 | -0.398312 | 0.219841  | H         | 2.778230  | -2.956618 | 5.959489  |
| C                                                  | -6.388505 | 0.674173  | 0.016916  | C         | 3.476048  | -3.529816 | -0.055509 |
| C                                                  | -5.880259 | -1.424998 | 1.092568  | C         | 3.162646  | -4.663271 | -0.811983 |
| C                                                  | -7.610381 | 0.723386  | 0.683789  | C         | 4.823386  | -3.221153 | 0.179413  |
| H                                                  | -6.118852 | 1.469234  | -0.672257 | C         | 4.178551  | -5.471176 | -1.329335 |
| C                                                  | -7.110044 | -1.378100 | 1.754825  | H         | 2.124963  | -4.916110 | -0.995447 |
| H                                                  | -5.211213 | -2.262657 | 1.250496  | C         | 5.834548  | -4.023062 | -0.344231 |
| C                                                  | -7.976785 | -0.304786 | 1.556215  | H         | 5.082980  | -2.353520 | 0.778360  |
| H                                                  | -8.278871 | 1.563210  | 0.518292  | C         | 5.516217  | -5.153851 | -1.100491 |

H 3.918329 -6.349717 -1.913130  
H 6.873159 -3.765958 -0.157654  
H 6.305223 -5.781277 -1.504711  
C 1.360548 2.423724 2.023416  
C 2.737239 2.272843 1.562844  
C 1.350151 3.850535 1.494969  
H 1.280257 4.643213 2.253249  
H 0.665425 4.043564 0.663441  
N 2.745668 3.582219 1.064588  
O 3.616572 1.406654 1.562646  
C 3.679939 4.371671 0.410823  
C 3.313023 5.644764 -0.060007  
C 5.000036 3.913165 0.228679  
C 4.252857 6.441368 -0.709569  
H 2.295113 5.996012 0.074668  
C 5.922932 4.724755 -0.424123  
H 5.275128 2.936843 0.608821  
C 5.561036 5.989776 -0.897012  
H 3.956987 7.420911 -1.074302  
H 6.939435 4.365642 -0.560605  
H 6.289241 6.614828 -1.404786  
C 0.513966 1.701466 2.998087  
H 0.857489 0.670422 3.119857  
H -0.537591 1.686659 2.693801  
H 0.552270 2.185056 3.988448  
H 2.684216 -0.444383 0.614116  
C 2.922158 -0.945035 -1.432739  
C 3.917215 0.032833 -1.549349  
C 2.521985 -1.647770 -2.578144  
C 4.506895 0.298806 -2.787375  
H 4.213012 0.596492 -0.669219  
C 3.112006 -1.383986 -3.812431

H 1.750580 -2.408619 -2.507827  
C 4.107566 -0.409103 -3.920203  
H 5.269624 1.068234 -2.863878  
H 2.793874 -1.937176 -4.691629  
H 4.562229 -0.199845 -4.884310  
H -3.067880 1.493150 -0.719868  
C -3.348042 1.262512 1.367614  
C -3.580435 2.637691 1.488097  
C -3.295280 0.483179 2.531626  
C -3.770107 3.222266 2.742172  
H -3.597752 3.256220 0.594981  
C -3.484298 1.064197 3.784812  
H -3.107738 -0.583887 2.462174  
C -3.724423 2.436411 3.893714  
H -3.946333 4.291482 2.816577  
H -3.443749 0.445845 4.677054  
H -3.869818 2.888703 4.870557  
Br -0.434244 2.810513 -1.649846

**<sup>1</sup>TS12-R**

B3LYP/BSI SCF energy: -2922.107089a.u.

M06/BSII SCF energy in solution: -2920.7905919a.u.

M06/BSII free energy in solution: -2919.82777a.u.

C 1.046470 -2.224679 -0.305186  
N 1.271738 -1.130424 0.317683  
O 2.066697 -2.757438 -1.014858  
C 3.280612 -2.007167 -0.649756  
C 2.640056 -0.696204 -0.010200  
H 3.147791 -0.461862 0.924370  
C 2.644060 0.559992 -0.869204  
C 3.797578 1.355842 -0.908235

|    |           |           |           |   |           |           |           |
|----|-----------|-----------|-----------|---|-----------|-----------|-----------|
| C  | 1.529608  | 0.953069  | -1.618957 | C | -0.354459 | -3.895333 | -1.562979 |
| C  | 3.842080  | 2.509396  | -1.689990 | H | -1.266360 | -4.493149 | -1.522721 |
| H  | 4.669002  | 1.071047  | -0.324532 | H | -0.393602 | -3.277976 | -2.463833 |
| C  | 1.569407  | 2.113066  | -2.395678 | H | 0.504630  | -4.563239 | -1.637072 |
| H  | 0.616871  | 0.369398  | -1.577066 | C | -3.072276 | -0.477333 | -2.173396 |
| C  | 2.725449  | 2.892277  | -2.436657 | C | -2.956205 | -1.226758 | -3.357006 |
| H  | 4.745962  | 3.111849  | -1.709984 | C | -2.919322 | 0.912133  | -2.240327 |
| H  | 0.688838  | 2.409706  | -2.957360 | C | -2.671888 | -0.606903 | -4.570710 |
| H  | 2.750606  | 3.798021  | -3.035038 | H | -3.089405 | -2.303024 | -3.319564 |
| C  | -1.426453 | -2.088104 | -0.171662 | C | -2.633610 | 1.532321  | -3.462891 |
| N  | -1.504918 | -1.034571 | 0.557593  | H | -3.024307 | 1.537588  | -1.359966 |
| O  | -2.524283 | -2.426735 | -0.883167 | C | -2.504587 | 0.779768  | -4.627828 |
| C  | -3.399167 | -1.237613 | -0.875568 | H | -2.584130 | -1.205629 | -5.473120 |
| C  | -2.889290 | -0.514546 | 0.435071  | H | -2.506298 | 2.610697  | -3.488772 |
| H  | -2.848729 | 0.561486  | 0.283611  | H | -2.280524 | 1.265700  | -5.573236 |
| C  | -3.704586 | -0.767669 | 1.694290  | C | -4.849095 | -1.700658 | -0.861404 |
| C  | -4.620626 | 0.208351  | 2.110534  | C | -5.867437 | -0.782726 | -1.153801 |
| C  | -3.589548 | -1.948269 | 2.438541  | C | -5.196445 | -3.019522 | -0.548979 |
| C  | -5.414813 | -0.001068 | 3.239562  | C | -7.204588 | -1.174913 | -1.124279 |
| H  | -4.685806 | 1.142555  | 1.560117  | H | -5.613891 | 0.240153  | -1.414391 |
| C  | -4.379715 | -2.154950 | 3.569911  | C | -6.535909 | -3.413181 | -0.530692 |
| H  | -2.871362 | -2.707061 | 2.145286  | H | -4.417614 | -3.739519 | -0.327823 |
| C  | -5.298424 | -1.183704 | 3.971727  | C | -7.544697 | -2.493414 | -0.815188 |
| H  | -6.119395 | 0.765404  | 3.550350  | H | -7.980713 | -0.449556 | -1.350864 |
| H  | -4.274785 | -3.074483 | 4.139006  | H | -6.787844 | -4.442742 | -0.292270 |
| H  | -5.912905 | -1.344659 | 4.853004  | H | -8.586446 | -2.800532 | -0.799659 |
| Ni | -0.014212 | -0.341225 | 1.766818  | C | 4.095686  | -1.803813 | -1.924360 |
| C  | -0.239707 | -3.033354 | -0.287848 | C | 5.488709  | -1.666265 | -1.873515 |
| C  | -0.203804 | -3.952210 | 0.969204  | C | 3.457477  | -1.720907 | -3.169646 |
| H  | 0.667119  | -4.611973 | 0.921066  | C | 6.224924  | -1.439692 | -3.037310 |
| H  | -0.143837 | -3.354033 | 1.881867  | H | 6.007576  | -1.747061 | -0.924517 |
| H  | -1.105750 | -4.571018 | 1.000712  | C | 4.195025  | -1.503861 | -4.332743 |

H 2.381708 -1.835170 -3.229780  
C 5.581798 -1.359095 -4.272084  
H 7.304498 -1.336390 -2.975535  
H 3.681952 -1.447674 -5.288549  
H 6.155190 -1.189741 -5.178862  
C 4.028842 -2.863023 0.383004  
C 3.988051 -4.261074 0.266804  
C 4.805267 -2.302585 1.405189  
C 4.683140 -5.073461 1.160895  
H 3.404817 -4.710111 -0.529438  
C 5.507705 -3.116690 2.297922  
H 4.877396 -1.225992 1.520025  
C 5.445257 -4.504155 2.183224  
H 4.631782 -6.153494 1.055878  
H 6.098081 -2.659027 3.086228  
H 5.985886 -5.136298 2.881448  
C -1.482787 2.893039 2.325057  
C -2.140211 3.144706 1.050131  
C -0.313630 3.763312 1.879885  
H -0.176564 4.702981 2.433778  
H 0.648698 3.257427 1.756784  
N -1.062465 3.940781 0.612929  
O -3.195160 2.848839 0.484693  
C -0.831666 4.747007 -0.489177  
C 0.389775 5.433118 -0.615567  
C -1.820637 4.901531 -1.483342  
C 0.617810 6.251996 -1.719318  
H 1.154332 5.315663 0.145648  
C -1.571268 5.723102 -2.579240  
H -2.767870 4.389006 -1.365225  
C -0.355376 6.401939 -2.709791  
H 1.565256 6.777378 -1.802853

H -2.342297 5.842895 -3.335836  
H -0.173022 7.042910 -3.566887  
C -1.984429 2.494989 3.659380  
H -2.888937 1.889613 3.563721  
H -1.240836 1.918935 4.217634  
H -2.233273 3.381062 4.267019  
C 0.799518 0.013347 3.539458  
H 1.402415 -0.891299 3.737149  
H -0.058492 -0.068466 4.231178  
C 1.629513 1.239068 3.954965  
H 1.017489 2.151049 3.902797  
H 1.937276 1.162903 5.013700  
C 2.898166 1.472207 3.124803  
H 3.513873 0.558993 3.151880  
H 2.616812 1.622601 2.073106  
C 3.745129 2.658609 3.603913  
H 4.026926 2.504138 4.655583  
H 3.129989 3.570889 3.590643  
C 5.011903 2.898789 2.772356  
H 5.633812 1.992075 2.791885  
H 4.729755 3.050455 1.721440  
C 5.841646 4.092346 3.256944  
H 6.164417 3.954501 4.295389  
H 6.739599 4.235437 2.646061  
H 5.260063 5.020632 3.215189

**<sup>1</sup>TS12-R**

B3LYP-D3BJ/BSI SCF energy in solution:

-2922.522219a.u.

M06/BSII SCF energy in solution: -2920.80232a.u.

M06/BSII free energy in solution: -2919.830986a.u.



|                                             |    |           |           |           |
|---------------------------------------------|----|-----------|-----------|-----------|
| B3LYP-D3BJ/BSI SCF energy in solution:      | C  | -3.562586 | -2.229843 | 2.013112  |
| -2922.522219a.u.                            | C  | -5.706359 | -0.578140 | 2.689616  |
| B3LYP-D3BJ /BSII SCF energy in solution:    | H  | -4.880459 | 0.806028  | 1.255277  |
| -2923.177336 a.u.                           | C  | -4.479472 | -2.637008 | 2.984203  |
| B3LYP-D3BJ /BSII free energy in solution: - | H  | -2.726630 | -2.873177 | 1.761747  |
| 2922.206002 a.u.                            | C  | -5.556583 | -1.815636 | 3.320848  |
|                                             | H  | -6.536642 | 0.070948  | 2.952609  |
|                                             | H  | -4.351361 | -3.597138 | 3.475815  |
|                                             | H  | -6.271168 | -2.134535 | 4.074039  |
|                                             | Ni | -0.064860 | -0.726880 | 1.807744  |
|                                             | C  | -0.156774 | -3.018886 | -0.627176 |
|                                             | C  | -0.196364 | -4.080368 | 0.505807  |
|                                             | H  | 0.677444  | -4.733124 | 0.428155  |
|                                             | H  | -0.188185 | -3.594071 | 1.484653  |
|                                             | H  | -1.099394 | -4.689442 | 0.409175  |
|                                             | C  | -0.195278 | -3.704951 | -2.003309 |
|                                             | H  | -1.121525 | -4.272260 | -2.106550 |
|                                             | H  | -0.142683 | -2.976243 | -2.815423 |
|                                             | H  | 0.647435  | -4.391276 | -2.097379 |
|                                             | C  | -2.682646 | -0.075730 | -2.265295 |
|                                             | C  | -2.240489 | -0.622096 | -3.478962 |
|                                             | C  | -2.676877 | 1.314760  | -2.106084 |
|                                             | C  | -1.778891 | 0.202025  | -4.503491 |
|                                             | H  | -2.253402 | -1.697099 | -3.615335 |
|                                             | C  | -2.222636 | 2.139305  | -3.139152 |
|                                             | H  | -3.030521 | 1.775622  | -1.189857 |
|                                             | C  | -1.766566 | 1.588654  | -4.336231 |
|                                             | H  | -1.431324 | -0.239613 | -5.432853 |
|                                             | H  | -2.213125 | 3.214095  | -2.993782 |
|                                             | H  | -1.405127 | 2.233407  | -5.131837 |
|                                             | C  | -4.650266 | -1.384302 | -1.334473 |
|                                             | C  | -5.582027 | -0.396260 | -1.671396 |
|                                             | C  | 1.114141  | -2.210893 | -0.465925 |
|                                             | N  | 1.291527  | -1.244677 | 0.354471  |
|                                             | O  | 2.163024  | -2.558768 | -1.240405 |
|                                             | C  | 3.333759  | -1.852349 | -0.688175 |
|                                             | C  | 2.622363  | -0.680721 | 0.101703  |
|                                             | H  | 3.126985  | -0.509980 | 1.048990  |
|                                             | C  | 2.533194  | 0.631267  | -0.649744 |
|                                             | C  | 3.646572  | 1.480814  | -0.648198 |
|                                             | C  | 1.408680  | 0.984304  | -1.404125 |
|                                             | C  | 3.652268  | 2.645501  | -1.413664 |
|                                             | H  | 4.520169  | 1.214199  | -0.061447 |
|                                             | C  | 1.410992  | 2.154540  | -2.165909 |
|                                             | H  | 0.528619  | 0.351295  | -1.398882 |
|                                             | C  | 2.534545  | 2.980804  | -2.181851 |
|                                             | H  | 4.527345  | 3.288866  | -1.410761 |
|                                             | H  | 0.529366  | 2.418652  | -2.739944 |
|                                             | H  | 2.532441  | 3.889494  | -2.775284 |
|                                             | C  | -1.332696 | -2.075483 | -0.459818 |
|                                             | N  | -1.437604 | -1.137734 | 0.411794  |
|                                             | O  | -2.381520 | -2.248339 | -1.292101 |
|                                             | C  | -3.189550 | -1.022742 | -1.175678 |
|                                             | C  | -2.781588 | -0.547770 | 0.269104  |
|                                             | H  | -2.706707 | 0.534062  | 0.293026  |
|                                             | C  | -3.712146 | -0.994699 | 1.374587  |
|                                             | C  | -4.786219 | -0.167539 | 1.725505  |

|   |           |           |           |   |           |           |           |
|---|-----------|-----------|-----------|---|-----------|-----------|-----------|
| C | -5.099003 | -2.681138 | -1.060607 | C | -2.444781 | 2.812466  | 1.398454  |
| C | -6.942777 | -0.698346 | -1.723800 | C | -0.506901 | 2.854818  | 2.218484  |
| H | -5.248014 | 0.611973  | -1.890242 | H | -0.142875 | 3.620724  | 2.913761  |
| C | -6.459172 | -2.983202 | -1.121351 | H | 0.298223  | 2.172495  | 1.938168  |
| H | -4.383977 | -3.451416 | -0.798555 | N | -1.226833 | 3.418829  | 1.050400  |
| C | -7.386649 | -1.992797 | -1.449159 | O | -3.543959 | 2.841278  | 0.842701  |
| H | -7.654350 | 0.080077  | -1.982649 | C | -0.831622 | 4.345280  | 0.104414  |
| H | -6.792887 | -3.994647 | -0.908656 | C | 0.502844  | 4.784800  | 0.081299  |
| H | -8.445902 | -2.228391 | -1.491866 | C | -1.756278 | 4.858634  | -0.826257 |
| C | 4.198171  | -1.403651 | -1.850176 | C | 0.904277  | 5.725675  | -0.863194 |
| C | 5.576002  | -1.224065 | -1.692634 | H | 1.216697  | 4.377565  | 0.789242  |
| C | 3.603952  | -1.067733 | -3.073679 | C | -1.332888 | 5.793821  | -1.766367 |
| C | 6.344906  | -0.701687 | -2.734207 | H | -2.784615 | 4.520721  | -0.790149 |
| H | 6.053918  | -1.485626 | -0.755462 | C | -0.005134 | 6.233746  | -1.794110 |
| C | 4.373037  | -0.551210 | -4.114169 | H | 1.938480  | 6.056235  | -0.874638 |
| H | 2.537643  | -1.202649 | -3.206169 | H | -2.050013 | 6.186699  | -2.481599 |
| C | 5.746723  | -0.361140 | -3.947269 | H | 0.314610  | 6.964881  | -2.529955 |
| H | 7.413136  | -0.564955 | -2.594218 | C | -2.352082 | 1.533296  | 3.782707  |
| H | 3.896406  | -0.293273 | -5.055265 | H | -3.400410 | 1.256712  | 3.652087  |
| H | 6.344846  | 0.045727  | -4.757199 | H | -1.779263 | 0.629282  | 4.014681  |
| C | 4.035833  | -2.824849 | 0.256203  | H | -2.274363 | 2.194502  | 4.659560  |
| C | 3.971675  | -4.201437 | 0.003886  | C | 0.707688  | -0.577876 | 3.636511  |
| C | 4.786637  | -2.372950 | 1.348227  | H | 1.446955  | -1.396855 | 3.721948  |
| C | 4.625872  | -5.107172 | 0.838247  | H | -0.082367 | -0.851452 | 4.360333  |
| H | 3.404528  | -4.562135 | -0.846226 | C | 1.378679  | 0.716197  | 4.132478  |
| C | 5.447074  | -3.279922 | 2.179615  | H | 0.636966  | 1.525725  | 4.185873  |
| H | 4.869817  | -1.312271 | 1.559456  | H | 1.761370  | 0.614288  | 5.164767  |
| C | 5.364842  | -4.649917 | 1.931082  | C | 2.541734  | 1.184775  | 3.252723  |
| H | 4.559242  | -6.171269 | 0.631432  | H | 3.313399  | 0.399920  | 3.233537  |
| H | 6.021494  | -2.910793 | 3.023903  | H | 2.188349  | 1.281598  | 2.218674  |
| H | 5.872785  | -5.355180 | 2.581985  | C | 3.174857  | 2.507430  | 3.693349  |
| C | -1.833173 | 2.203070  | 2.576841  | H | 3.544270  | 2.416658  | 4.725115  |

H 2.399617 3.287382 3.717432  
C 4.317733 2.971127 2.785035  
H 5.098934 2.198066 2.764727  
H 3.946789 3.055821 1.755424  
C 4.929995 4.304455 3.218440  
H 5.337755 4.242722 4.234555  
H 5.743760 4.611661 2.551996  
H 4.178137 5.102758 3.213927

**<sup>1</sup>TS12-R**

wB97XD/BSI SCF energy in gas:

-2921.298623a.u.

wB97XD/BSII SCF energy in solution:

-2921.949118a.u.

wB97XD/BSII free energy in solution:

-2920.959517a.u.

C -0.474631 -2.441595 -0.462882  
N -0.920453 -1.319784 -0.885656  
O -1.261201 -3.144859 0.343021  
C -2.548904 -2.464374 0.427086  
C -2.239649 -1.084836 -0.290242  
H -2.947350 -0.944599 -1.107217  
C -2.274237 0.145998 0.584549  
C -3.502425 0.767329 0.810309  
C -1.129314 0.660672 1.188821  
C -3.589768 1.890448 1.625517  
H -4.399164 0.379810 0.332389  
C -1.216082 1.789485 1.992936  
H -0.160535 0.201726 1.020477  
C -2.440801 2.409333 2.214237  
H -4.550435 2.371203 1.781233

H -0.314222 2.208794 2.420191  
H -2.487265 3.312569 2.814230  
C 1.866612 -1.902948 -0.479774  
N 1.752328 -0.706303 -0.904878  
O 2.914082 -2.181256 0.305151  
C 3.406081 -0.876142 0.748260  
C 2.934397 0.028706 -0.435199  
H 2.625387 1.017016 -0.090638  
C 3.947073 0.220321 -1.542121  
C 4.645035 1.427826 -1.598124  
C 4.213087 -0.766636 -2.491249  
C 5.607906 1.637432 -2.580358  
H 4.396532 2.209837 -0.886532  
C 5.173052 -0.556097 -3.475731  
H 3.665457 -1.704596 -2.469360  
C 5.875355 0.645546 -3.519820  
H 6.140431 2.582472 -2.618799  
H 5.371878 -1.329537 -4.211309  
H 6.623097 0.810487 -4.289358  
Ni 0.041678 -0.073524 -1.942969  
C 0.887089 -3.020673 -0.770723  
C 0.950162 -3.383754 -2.271384  
H 0.198282 -4.143996 -2.499041  
H 0.764707 -2.503294 -2.891085  
H 1.937702 -3.789858 -2.506812  
C 1.171083 -4.252281 0.095546  
H 2.179654 -4.617431 -0.105920  
H 1.090650 -4.024200 1.159749  
H 0.456273 -5.042342 -0.142183  
C 2.663120 -0.566812 2.051302  
C 2.325566 -1.623738 2.902721  
C 2.346464 0.739044 2.432198

|   |           |           |           |   |           |           |           |
|---|-----------|-----------|-----------|---|-----------|-----------|-----------|
| C | 1.667669  | -1.384317 | 4.104299  | C | -4.699056 | -2.720747 | -0.906060 |
| H | 2.583373  | -2.639024 | 2.621107  | C | -4.264511 | -5.443978 | -1.224653 |
| C | 1.709760  | 0.974767  | 3.649277  | H | -2.465677 | -5.132819 | -0.090845 |
| H | 2.552009  | 1.583660  | 1.780043  | C | -5.621143 | -3.495495 | -1.602924 |
| C | 1.358610  | -0.080137 | 4.483264  | H | -4.890132 | -1.658936 | -0.782187 |
| H | 1.404744  | -2.218058 | 4.748599  | C | -5.403259 | -4.859212 | -1.770502 |
| H | 1.476479  | 1.996318  | 3.933285  | H | -4.087889 | -6.507912 | -1.346712 |
| H | 0.851033  | 0.111342  | 5.423470  | H | -6.507276 | -3.028330 | -2.020188 |
| C | 4.905525  | -0.947530 | 0.938011  | H | -6.116226 | -5.462466 | -2.323082 |
| C | 5.563096  | 0.093761  | 1.594586  | C | 0.397573  | 2.124256  | -1.631951 |
| C | 5.651579  | -1.997968 | 0.406943  | C | 1.014090  | 2.891895  | -0.583540 |
| C | 6.947782  | 0.085343  | 1.713318  | C | -0.776735 | 3.108085  | -1.582971 |
| H | 4.992700  | 0.915819  | 2.014932  | H | -0.922670 | 3.746150  | -2.467247 |
| C | 7.037208  | -2.009644 | 0.535923  | H | -1.742182 | 2.712883  | -1.249493 |
| H | 5.146671  | -2.805567 | -0.109871 | N | -0.070796 | 3.791470  | -0.498765 |
| C | 7.689894  | -0.968136 | 1.186450  | O | 2.067488  | 2.911211  | 0.070930  |
| H | 7.446594  | 0.904563  | 2.221294  | C | -0.572622 | 4.600521  | 0.499258  |
| H | 7.606489  | -2.835572 | 0.121142  | C | -1.857690 | 5.147498  | 0.370126  |
| H | 8.770867  | -0.976690 | 1.284142  | C | 0.184390  | 4.891408  | 1.646598  |
| C | -2.882031 | -2.347190 | 1.906431  | C | -2.383066 | 5.944335  | 1.379660  |
| C | -4.186939 | -2.471279 | 2.377080  | H | -2.443325 | 4.932130  | -0.518678 |
| C | -1.859452 | -2.044296 | 2.811039  | C | -0.361442 | 5.681812  | 2.649340  |
| C | -4.468666 | -2.284950 | 3.728556  | H | 1.183437  | 4.477928  | 1.726656  |
| H | -4.991409 | -2.717962 | 1.692995  | C | -1.646612 | 6.212932  | 2.531042  |
| C | -2.141595 | -1.858350 | 4.156604  | H | -3.381207 | 6.357398  | 1.263826  |
| H | -0.835652 | -1.936928 | 2.467849  | H | 0.229296  | 5.892298  | 3.536804  |
| C | -3.449534 | -1.975961 | 4.621305  | H | -2.059800 | 6.835888  | 3.317696  |
| H | -5.490356 | -2.385913 | 4.080738  | C | 1.111728  | 1.668808  | -2.873441 |
| H | -1.334691 | -1.608864 | 4.838210  | H | 1.051775  | 0.567474  | -3.204384 |
| H | -3.670391 | -1.826209 | 5.673334  | H | 0.756772  | 2.179976  | -3.776442 |
| C | -3.549145 | -3.298886 | -0.363266 | H | 2.192810  | 1.797677  | -2.776639 |
| C | -3.347491 | -4.671024 | -0.520019 | C | -1.226417 | -0.309600 | -3.406711 |

|   |           |           |           |   |           |           |           |
|---|-----------|-----------|-----------|---|-----------|-----------|-----------|
| H | -1.859190 | -1.180306 | -3.188029 | C | -2.442680 | 0.831332  | 1.679511  |
| H | -0.592481 | -0.596337 | -4.258388 | C | -4.937284 | 1.577527  | 0.686949  |
| C | -2.100735 | 0.880713  | -3.795219 | H | -4.771253 | -0.142836 | -0.590868 |
| H | -1.489147 | 1.788563  | -3.871759 | C | -3.075957 | 1.974950  | 2.168516  |
| H | -2.521473 | 0.723770  | -4.800647 | H | -1.460889 | 0.561945  | 2.054394  |
| C | -3.247100 | 1.144594  | -2.820972 | C | -4.326461 | 2.349459  | 1.676422  |
| H | -3.958449 | 0.304627  | -2.853028 | H | -5.904704 | 1.866720  | 0.286654  |
| H | -2.840502 | 1.169231  | -1.805710 | H | -2.583318 | 2.586319  | 2.918268  |
| C | -3.990143 | 2.454091  | -3.077718 | H | -4.809566 | 3.247621  | 2.048289  |
| H | -4.501143 | 2.412980  | -4.049549 | C | 1.894191  | -1.236527 | 0.997022  |
| H | -3.255924 | 3.267687  | -3.153827 | N | 1.808086  | -0.591705 | -0.107755 |
| C | -4.992277 | 2.801260  | -1.976863 | O | 3.084218  | -1.196676 | 1.644080  |
| H | -5.738927 | 1.999224  | -1.895558 | C | 3.915120  | -0.183543 | 0.986005  |
| H | -4.464200 | 2.828092  | -1.015166 | C | 3.130610  | 0.006559  | -0.390134 |
| C | -5.693964 | 4.137462  | -2.209201 | H | 2.980492  | 1.071984  | -0.565068 |
| H | -6.238177 | 4.138635  | -3.159928 | C | 3.776354  | -0.577942 | -1.635096 |
| H | -6.409823 | 4.361275  | -1.412558 | C | 4.621671  | 0.231043  | -2.404794 |
| H | -4.966597 | 4.955894  | -2.244652 | C | 3.563720  | -1.901922 | -2.036016 |

**<sup>3</sup>TS12-R**

B3LYP/BSI SCF energy: -2922.107717a.u.

M06/BSII SCF energy in solution: -2920.788647a.u.

M06/BSII free energy in solution: -2919.829516a.u.

|   |           |           |           |    |          |           |           |
|---|-----------|-----------|-----------|----|----------|-----------|-----------|
| C | -0.535578 | -1.892881 | 1.142616  | H  | 4.788865 | 1.265648  | -2.114375 |
| N | -0.922522 | -1.133712 | 0.184821  | C  | 4.187509 | -2.405806 | -3.177823 |
| O | -1.482249 | -2.621466 | 1.779104  | H  | 2.887764 | -2.533942 | -1.470437 |
| C | -2.693692 | -2.550121 | 0.923669  | C  | 5.034773 | -1.593865 | -3.933467 |
| C | -2.399707 | -1.211672 | 0.136869  | H  | 5.901203 | 0.371882  | -4.129400 |
| H | -2.711491 | -1.312657 | -0.902425 | H  | 4.003696 | -3.432421 | -3.481109 |
| C | -3.047122 | 0.049653  | 0.688777  | H  | 5.516334 | -1.986173 | -4.824374 |
| C | -4.297895 | 0.441165  | 0.193244  | Ni | 0.235526 | -0.545113 | -1.433392 |
|   |           |           |           | C  | 0.869023 | -2.140806 | 1.652818  |
|   |           |           |           | C  | 1.251886 | -3.613997 | 1.321113  |
|   |           |           |           | H  | 0.533710 | -4.291898 | 1.786587  |
|   |           |           |           | H  | 1.239526 | -3.785352 | 0.241490  |
|   |           |           |           | H  | 2.250073 | -3.834330 | 1.707889  |

|   |           |           |          |   |           |           |           |
|---|-----------|-----------|----------|---|-----------|-----------|-----------|
| C | 0.886268  | -1.937758 | 3.190045 | H | -2.868175 | -1.986853 | 3.614288  |
| H | 1.870983  | -2.189282 | 3.586998 | C | -6.240782 | -2.374511 | 3.397541  |
| H | 0.659786  | -0.901168 | 3.456136 | H | -7.302399 | -2.898825 | 1.593854  |
| H | 0.141734  | -2.587456 | 3.652697 | H | -4.905010 | -1.872016 | 5.012567  |
| C | 3.865494  | 1.078550  | 1.859977 | H | -7.136282 | -2.322150 | 4.009925  |
| C | 3.692717  | 0.956863  | 3.246202 | C | -2.634988 | -3.809662 | 0.045995  |
| C | 4.048888  | 2.360054  | 1.322864 | C | -2.965001 | -5.045572 | 0.628166  |
| C | 3.679288  | 2.084553  | 4.066343 | C | -2.172312 | -3.797914 | -1.277546 |
| H | 3.564930  | -0.027570 | 3.681056 | C | -2.853947 | -6.231212 | -0.094182 |
| C | 4.045348  | 3.490006  | 2.144900 | H | -3.315429 | -5.074341 | 1.654864  |
| H | 4.205184  | 2.494291  | 0.256837 | C | -2.064874 | -4.988931 | -2.002559 |
| C | 3.853426  | 3.357269  | 3.519728 | H | -1.873697 | -2.875419 | -1.763262 |
| H | 3.536481  | 1.966477  | 5.136667 | C | -2.406686 | -6.206562 | -1.417621 |
| H | 4.191595  | 4.472449  | 1.705477 | H | -3.120462 | -7.173881 | 0.375441  |
| H | 3.844684  | 4.235199  | 4.158723 | H | -1.710561 | -4.953549 | -3.028620 |
| C | 5.332301  | -0.748012 | 0.876884 | H | -2.325818 | -7.129168 | -1.985367 |
| C | 6.441559  | 0.100920  | 0.769871 | C | 0.721498  | 3.196023  | -2.043205 |
| C | 5.544963  | -2.132885 | 0.855706 | C | -0.593903 | 3.829621  | -1.944086 |
| C | 7.728293  | -0.421303 | 0.635151 | N | -0.379619 | 4.084840  | -0.562157 |
| H | 6.309326  | 1.176506  | 0.803709 | C | -1.072335 | 4.766108  | 0.421901  |
| C | 6.832397  | -2.654290 | 0.730298 | C | -2.328564 | 5.340384  | 0.137696  |
| H | 4.701274  | -2.805913 | 0.948378 | C | -0.525022 | 4.896879  | 1.712024  |
| C | 7.930315  | -1.801155 | 0.616600 | C | -3.010154 | 6.026978  | 1.137045  |
| H | 8.573815  | 0.255665  | 0.553938 | H | -2.738251 | 5.234127  | -0.859785 |
| H | 6.974816  | -3.731138 | 0.722263 | C | -1.226731 | 5.587351  | 2.698951  |
| H | 8.932757  | -2.207389 | 0.518820 | H | 0.443481  | 4.458845  | 1.934894  |
| C | -3.922260 | -2.513742 | 1.815414 | C | -2.471690 | 6.156424  | 2.422256  |
| C | -5.183291 | -2.772311 | 1.259012 | H | -3.975754 | 6.469787  | 0.907673  |
| C | -3.837134 | -2.186993 | 3.172920 | H | -0.792513 | 5.683602  | 3.690712  |
| C | -6.333810 | -2.697881 | 2.042424 | H | -3.012163 | 6.697209  | 3.193274  |
| H | -5.263826 | -3.041991 | 0.210307 | C | 1.593888  | 2.825525  | -3.178663 |
| C | -4.989284 | -2.122291 | 3.958845 | H | 1.992965  | 1.808568  | -3.082799 |

|   |           |           |           |   |           |           |           |
|---|-----------|-----------|-----------|---|-----------|-----------|-----------|
| H | 1.030340  | 2.874120  | -4.113699 | N | 1.192866  | -0.327223 | -0.215692 |
| H | 2.453812  | 3.509239  | -3.264123 | O | 2.106152  | -1.125735 | 1.678604  |
| C | -0.280337 | -0.648320 | -3.349450 | C | 3.270686  | -0.622056 | 0.934950  |
| H | -0.662300 | -1.668521 | -3.540514 | C | 2.638817  | -0.401291 | -0.503643 |
| H | 0.691976  | -0.628400 | -3.873623 | H | 2.941315  | 0.564244  | -0.904515 |
| C | -1.215916 | 0.358944  | -4.043883 | C | 2.939380  | -1.452957 | -1.558283 |
| H | -0.808405 | 1.374223  | -3.962247 | C | 3.844830  | -1.156824 | -2.583203 |
| H | -1.279384 | 0.151063  | -5.127659 | C | 2.335686  | -2.716395 | -1.538041 |
| C | -2.648403 | 0.391526  | -3.497939 | C | 4.151365  | -2.102997 | -3.562105 |
| H | -3.083843 | -0.619871 | -3.559936 | H | 4.303738  | -0.172367 | -2.624883 |
| H | -2.615680 | 0.654362  | -2.431810 | C | 2.639036  | -3.664013 | -2.514760 |
| C | -3.559809 | 1.384004  | -4.232518 | H | 1.614488  | -2.958811 | -0.763864 |
| H | -3.568403 | 1.143810  | -5.306422 | C | 3.549801  | -3.361206 | -3.529208 |
| H | -3.127831 | 2.389248  | -4.140855 | H | 4.851434  | -1.852250 | -4.353819 |
| C | -5.003176 | 1.406938  | -3.713964 | H | 2.160990  | -4.639239 | -2.485736 |
| H | -5.433412 | 0.396877  | -3.784700 | H | 3.782522  | -4.098506 | -4.292209 |
| H | -4.995903 | 1.662851  | -2.645752 | C | -1.511259 | -0.695713 | 0.833106  |
| C | -5.901537 | 2.395049  | -4.465836 | N | -1.572172 | -0.065254 | -0.283632 |
| H | -5.954870 | 2.147721  | -5.532731 | O | -2.681048 | -1.148143 | 1.350521  |
| H | -6.924899 | 2.393884  | -4.073458 | C | -3.691583 | -1.024102 | 0.280311  |
| H | -5.513928 | 3.416891  | -4.385091 | C | -3.001792 | 0.043922  | -0.660862 |
| C | 0.970195  | 3.487294  | -0.570609 | H | -3.111691 | -0.266844 | -1.700441 |
| H | 1.075520  | 2.621759  | 0.094541  | C | -3.483601 | 1.481426  | -0.565761 |
| H | 1.769573  | 4.211998  | -0.351875 | C | -4.165348 | 2.046901  | -1.649002 |
| O | -1.531768 | 4.103892  | -2.673876 | C | -3.257210 | 2.266859  | 0.571956  |
|   |           |           |           | C | -4.620968 | 3.365345  | -1.598304 |
|   |           |           |           | H | -4.331086 | 1.454117  | -2.545195 |
|   |           |           |           | C | -3.710933 | 3.583365  | 0.625989  |
|   |           |           |           | H | -2.718601 | 1.852621  | 1.418311  |
|   |           |           |           | C | -4.395465 | 4.136913  | -0.458742 |
|   |           |           |           | H | -5.141906 | 3.789311  | -2.451881 |
|   |           |           |           | H | -3.525427 | 4.180711  | 1.514119  |

**<sup>2</sup>IM7**

B3LYP/BSI SCF energy: -2405.084799a.u.

M06/BSII SCF energy in solution: -2403.993115a.u.

M06/BSII free energy in solution: -2403.198293a.u.

|   |          |           |          |
|---|----------|-----------|----------|
| C | 1.003420 | -0.773180 | 0.966589 |
|---|----------|-----------|----------|

|    |           |           |           |   |           |           |           |
|----|-----------|-----------|-----------|---|-----------|-----------|-----------|
| H  | -4.742954 | 5.165141  | -0.417182 | H | -8.428748 | 0.586477  | 2.351272  |
| Ni | -0.117435 | 0.678570  | -1.459052 | C | 4.383014  | -1.663051 | 1.021630  |
| C  | -0.302757 | -0.961148 | 1.710920  | C | 5.678861  | -1.329287 | 0.604261  |
| C  | -0.344445 | 0.044762  | 2.898057  | C | 4.141766  | -2.955663 | 1.500093  |
| H  | 0.504037  | -0.129830 | 3.562846  | C | 6.705926  | -2.269908 | 0.653676  |
| H  | -0.296414 | 1.074889  | 2.534975  | H | 5.891339  | -0.325768 | 0.249484  |
| H  | -1.269641 | -0.090525 | 3.463955  | C | 5.173928  | -3.894434 | 1.558106  |
| C  | -0.363593 | -2.412672 | 2.254870  | H | 3.147030  | -3.225296 | 1.833569  |
| H  | -1.283304 | -2.557962 | 2.822913  | C | 6.458281  | -3.557647 | 1.133196  |
| H  | -0.349829 | -3.140613 | 1.438315  | H | 7.702765  | -1.992746 | 0.323044  |
| H  | 0.492695  | -2.599062 | 2.905323  | H | 4.968960  | -4.891563 | 1.937652  |
| C  | -3.782865 | -2.420354 | -0.358856 | H | 7.260198  | -4.288791 | 1.177982  |
| C  | -4.623102 | -3.386708 | 0.216115  | C | 3.697088  | 0.686120  | 1.622372  |
| C  | -2.975981 | -2.800880 | -1.442842 | C | 3.656270  | 0.746657  | 3.024538  |
| C  | -4.671469 | -4.686248 | -0.285603 | C | 4.184951  | 1.795582  | 0.922473  |
| H  | -5.247835 | -3.117188 | 1.060845  | C | 4.069451  | 1.890451  | 3.703535  |
| C  | -3.026148 | -4.103096 | -1.945954 | H | 3.297459  | -0.112119 | 3.581758  |
| H  | -2.291288 | -2.097054 | -1.904328 | C | 4.605420  | 2.941857  | 1.603840  |
| C  | -3.875200 | -5.049187 | -1.373323 | H | 4.243454  | 1.790689  | -0.160473 |
| H  | -5.334778 | -5.414040 | 0.173096  | C | 4.545190  | 2.996238  | 2.994483  |
| H  | -2.397682 | -4.371525 | -2.790218 | H | 4.023979  | 1.916775  | 4.788666  |
| H  | -3.916538 | -6.059592 | -1.769915 | H | 4.972678  | 3.792754  | 1.037744  |
| C  | -5.009297 | -0.579212 | 0.891856  | H | 4.866739  | 3.889265  | 3.522280  |
| C  | -6.135348 | -0.458149 | 0.064096  | C | 0.626109  | 1.695632  | -2.989484 |
| C  | -5.135679 | -0.282032 | 2.251987  | H | -0.217849 | 2.118208  | -3.564196 |
| C  | -7.356712 | -0.037130 | 0.584672  | H | 1.101225  | 0.981764  | -3.682878 |
| H  | -6.056948 | -0.700342 | -0.991804 | C | 1.617986  | 2.842399  | -2.711295 |
| C  | -6.363183 | 0.134389  | 2.774529  | H | 2.530029  | 2.447059  | -2.231153 |
| H  | -4.274265 | -0.379847 | 2.901844  | H | 1.971422  | 3.311384  | -3.648573 |
| C  | -7.475738 | 0.261000  | 1.944566  | C | 1.053346  | 3.954523  | -1.818271 |
| H  | -8.216956 | 0.055830  | -0.071850 | H | 0.143667  | 4.357764  | -2.287813 |
| H  | -6.445008 | 0.359128  | 3.834231  | H | 0.726591  | 3.510194  | -0.867189 |



C 2.029996 5.105160 -1.543081  
H 2.361061 5.542790 -2.496654  
H 2.937501 4.704982 -1.064880  
C 1.448103 6.213910 -0.657122  
H 0.544684 6.618847 -1.133620  
H 1.116427 5.777273 0.295139  
C 2.432315 7.355210 -0.379301  
H 2.756618 7.834084 -1.310697  
H 1.986625 8.130014 0.254365  
H 3.331489 6.987472 0.129602

**<sup>2</sup>IM7**

B3LYP-D3BJ/BSI SCF energy in solution:

-2405.427104a.u.

M06/BSII SCF energy in solution: -2404.003632a.u.

M06/BSII free energy in solution: -2403.199512a.u.

C -1.004416 -0.483409 -0.921253  
N -1.168771 -0.208897 0.317725  
O -2.119748 -0.752336 -1.637818  
C -3.265855 -0.381811 -0.796109  
C -2.592782 -0.380827 0.636939  
H -2.932221 0.482703 1.204934  
C -2.822504 -1.629955 1.460216  
C -3.995487 -1.735988 2.216274  
C -1.928040 -2.705130 1.437192  
C -4.281723 -2.904083 2.920950  
H -4.692893 -0.903487 2.242547  
C -2.209376 -3.872602 2.149209  
H -1.008059 -2.629094 0.868436  
C -3.389400 -3.978644 2.886411  
H -5.199040 -2.975066 3.497999

H -1.505142 -4.699351 2.124495  
H -3.610103 -4.888468 3.436864  
C 1.497934 -0.486149 -0.827442  
N 1.576502 -0.202227 0.423330  
O 2.660393 -0.751585 -1.462945  
C 3.672639 -0.952326 -0.400112  
C 3.008492 -0.157858 0.781108  
H 3.173506 -0.685831 1.719920  
C 3.472328 1.274651 0.948903  
C 4.484109 1.563161 1.870418  
C 2.935364 2.314024 0.180144  
C 4.962186 2.865825 2.015291  
H 4.900743 0.761981 2.474177  
C 3.408228 3.618033 0.327401  
H 2.137875 2.111377 -0.525710  
C 4.425111 3.897391 1.242729  
H 5.749129 3.074725 2.733976  
H 2.979126 4.415788 -0.271849  
H 4.792274 4.913005 1.357280  
Ni 0.187678 0.470671 1.663672  
C 0.277086 -0.533841 -1.715011  
C 0.316067 0.699036 -2.659827  
H -0.516236 0.651172 -3.364957  
H 0.238823 1.628179 -2.089049  
H 1.251636 0.702857 -3.223527  
C 0.306332 -1.842061 -2.542396  
H 1.209357 -1.871236 -3.153152  
H 0.302598 -2.718432 -1.887634  
H -0.565935 -1.887148 -3.195884  
C 3.701606 -2.462455 -0.174826  
C 4.443504 -3.263677 -1.055100  
C 2.913579 -3.087114 0.801664

C 4.412503 -4.652958 -0.953287  
H 5.048710 -2.795146 -1.823733  
C 2.881908 -4.479810 0.902468  
H 2.310935 -2.504712 1.488866  
C 3.631610 -5.266844 0.028838  
H 4.998109 -5.255598 -1.641217  
H 2.268634 -4.945114 1.668502  
H 3.608546 -6.349422 0.111382  
C 4.992884 -0.373082 -0.847176  
C 6.150324 -0.688368 -0.124090  
C 5.071531 0.540096 -1.901470  
C 7.367925 -0.093117 -0.448537  
H 6.096469 -1.398504 0.695010  
C 6.293382 1.130052 -2.229986  
H 4.178160 0.790465 -2.460483  
C 7.443323 0.819031 -1.503754  
H 8.257325 -0.342529 0.122440  
H 6.342862 1.836739 -3.053167  
H 8.392039 1.282176 -1.757997  
C -4.343696 -1.433901 -0.988220  
C -5.693836 -1.127561 -0.789780  
C -3.982942 -2.756701 -1.276747  
C -6.664879 -2.127658 -0.863430  
H -5.994375 -0.108797 -0.574834  
C -4.953858 -3.753127 -1.355642  
H -2.940832 -3.005900 -1.435017  
C -6.299094 -3.443946 -1.143884  
H -7.708352 -1.872664 -0.703451  
H -4.657271 -4.773542 -1.579935  
H -7.054772 -4.221807 -1.200828  
C -3.701369 1.019074 -1.217410  
C -3.466001 1.457438 -2.526515

C -4.383705 1.865143 -0.334712  
C -3.883910 2.723148 -2.937174  
H -2.953601 0.805596 -3.223767  
C -4.815796 3.125904 -0.750709  
H -4.591019 1.548207 0.681985  
C -4.561104 3.562899 -2.050858  
H -3.683340 3.050000 -3.953253  
H -5.345098 3.766569 -0.052535  
H -4.887433 4.547739 -2.370241  
C -0.467697 1.553909 3.191046  
H 0.409132 2.070338 3.625720  
H -0.878244 0.960002 4.026098  
C -1.499735 2.630574 2.797145  
H -2.475256 2.156178 2.608387  
H -1.683582 3.351643 3.615476  
C -1.115757 3.422901 1.541159  
H -0.088033 3.799656 1.650922  
H -1.091018 2.730569 0.688524  
C -2.051227 4.589518 1.213580  
H -1.974004 5.358794 1.995572  
H -3.091480 4.236892 1.232560  
C -1.770745 5.218312 -0.154323  
H -0.721895 5.544022 -0.196837  
H -1.885333 4.447027 -0.927554  
C -2.686058 6.400547 -0.475795  
H -2.554028 7.213141 0.248648  
H -2.485128 6.808399 -1.472931  
H -3.740321 6.102393 -0.446309

**<sup>1</sup>TS12-S**

B3LYP/BSI SCF energy: -2922.094041a.u.

M06/BSII SCF energy in solution: -2920.78895a.u.

M06/BSII free energy in solution: -2919.829821a.u.

C -0.517074 -1.866917 1.128830  
N -0.911309 -1.084793 0.193032  
O -1.464617 -2.574598 1.788265  
C -2.699806 -2.455324 0.975410  
C -2.391252 -1.115987 0.196879  
H -2.743696 -1.187473 -0.831201  
C -2.977703 0.154528 0.794301  
C -4.227121 0.600857 0.343686  
C -2.319875 0.889997 1.786472  
C -4.812083 1.746557 0.881408  
H -4.742668 0.052694 -0.439618  
C -2.899936 2.041438 2.320873  
H -1.338319 0.578567 2.128133  
C -4.148866 2.471671 1.872416  
H -5.778890 2.079288 0.514767  
H -2.366820 2.615212 3.072650  
H -4.589719 3.376941 2.277927  
C 1.919210 -1.244935 0.954380  
N 1.826258 -0.550122 -0.120511  
O 3.119203 -1.249601 1.584456  
C 3.945500 -0.206201 0.968706  
C 3.159464 0.028890 -0.398023  
H 3.031279 1.100474 -0.548786  
C 3.793127 -0.540431 -1.657592  
C 4.739850 0.230631 -2.345524  
C 3.472456 -1.809576 -2.152278  
C 5.361091 -0.256912 -3.494852  
H 4.996705 1.221929 -1.979522  
C 4.088645 -2.297394 -3.305978  
H 2.717966 -2.407524 -1.653323

C 5.035933 -1.525193 -3.979032  
H 6.091665 0.356144 -4.014568  
H 3.819590 -3.279962 -3.682672  
H 5.511704 -1.904746 -4.878537  
Ni 0.234162 -0.447776 -1.416335  
C 0.894772 -2.167447 1.585475  
C 1.238790 -3.625425 1.155950  
H 0.521502 -4.317012 1.602751  
H 1.190117 -3.731350 0.069111  
H 2.243675 -3.886309 1.497686  
C 0.958605 -2.057054 3.130594  
H 1.948904 -2.348326 3.483867  
H 0.759544 -1.034325 3.464118  
H 0.214454 -2.719375 3.575149  
C 3.879490 1.024973 1.884859  
C 3.684805 0.858193 3.263214  
C 4.067194 2.323738 1.392042  
C 3.653441 1.959239 4.118720  
H 3.554108 -0.140204 3.663907  
C 4.044891 3.426811 2.249261  
H 4.242850 2.491986 0.333880  
C 3.830725 3.249298 3.615809  
H 3.493697 1.806544 5.182249  
H 4.193906 4.423320 1.843784  
H 3.807091 4.106322 4.282230  
C 5.364655 -0.761275 0.845059  
C 6.483033 0.080841 0.886171  
C 5.568716 -2.136602 0.663401  
C 7.771011 -0.436495 0.737548  
H 6.357095 1.145340 1.048015  
C 6.855617 -2.653588 0.523417  
H 4.717762 -2.806525 0.639607

|   |           |           |           |   |           |           |           |
|---|-----------|-----------|-----------|---|-----------|-----------|-----------|
| C | 7.963440  | -1.805384 | 0.556567  | C | -2.935435 | 6.035868  | 0.845730  |
| H | 8.623844  | 0.235211  | 0.773540  | H | -2.708113 | 5.017466  | -1.052115 |
| H | 6.991007  | -3.722867 | 0.388541  | C | -1.132834 | 5.746764  | 2.420432  |
| H | 8.965912  | -2.208711 | 0.447357  | H | 0.506319  | 4.509400  | 1.764831  |
| C | -3.896960 | -2.396090 | 1.908329  | C | -2.373423 | 6.301651  | 2.099443  |
| C | -5.182615 | -2.605434 | 1.389036  | H | -3.898511 | 6.465129  | 0.582423  |
| C | -3.757735 | -2.099867 | 3.268336  | H | -0.681337 | 5.946552  | 3.388776  |
| C | -6.304401 | -2.511275 | 2.210958  | H | -2.893047 | 6.934943  | 2.812225  |
| H | -5.305426 | -2.851936 | 0.338655  | C | 1.641574  | 2.583599  | -3.222823 |
| C | -4.881441 | -2.016129 | 4.092815  | H | 2.366563  | 1.798861  | -2.986481 |
| H | -2.769279 | -1.938642 | 3.681594  | H | 1.060954  | 2.254569  | -4.087975 |
| C | -6.157700 | -2.218100 | 3.568249  | H | 2.212530  | 3.477807  | -3.526747 |
| H | -7.292722 | -2.673587 | 1.790659  | C | -0.374285 | -0.615119 | -3.300367 |
| H | -4.755306 | -1.790456 | 5.147934  | H | -0.710808 | -1.662156 | -3.419436 |
| H | -7.030875 | -2.150647 | 4.210660  | H | 0.580638  | -0.574313 | -3.855066 |
| C | -2.712510 | -3.707073 | 0.084877  | C | -1.379496 | 0.304727  | -4.015145 |
| C | -3.016777 | -4.942114 | 0.683243  | H | -1.010481 | 1.337018  | -4.031289 |
| C | -2.349957 | -3.692659 | -1.268606 | H | -1.486997 | 0.010191  | -5.075247 |
| C | -2.974871 | -6.124406 | -0.051133 | C | -2.784473 | 0.334753  | -3.401156 |
| H | -3.292911 | -4.971365 | 1.732456  | H | -3.178714 | -0.693772 | -3.338685 |
| C | -2.313233 | -4.880416 | -2.006448 | H | -2.713563 | 0.710580  | -2.371843 |
| H | -2.077817 | -2.770852 | -1.769790 | C | -3.772936 | 1.208771  | -4.184572 |
| C | -2.626531 | -6.097040 | -1.404254 | H | -3.831468 | 0.852001  | -5.223886 |
| H | -3.218916 | -7.066547 | 0.431590  | H | -3.374304 | 2.230605  | -4.226633 |
| H | -2.035784 | -4.843246 | -3.055840 | C | -5.185102 | 1.242953  | -3.586797 |
| H | -2.600189 | -7.017020 | -1.981322 | H | -5.579514 | 0.218071  | -3.520435 |
| C | 0.742053  | 2.883129  | -2.084802 | H | -5.128318 | 1.617104  | -2.555529 |
| C | -0.582704 | 3.509409  | -2.017729 | C | -6.162223 | 2.110546  | -4.387667 |
| N | -0.359444 | 3.873783  | -0.663471 | H | -6.265304 | 1.743483  | -5.415679 |
| C | -1.028013 | 4.671659  | 0.248665  | H | -7.161096 | 2.120075  | -3.936833 |
| C | -2.280619 | 5.229482  | -0.079408 | H | -5.811471 | 3.147335  | -4.443512 |
| C | -0.457970 | 4.937781  | 1.507591  | C | 1.004612  | 3.311204  | -0.645837 |

H 1.142971 2.512015 0.091639  
H 1.786765 4.074229 -0.508753  
O -1.528619 3.724816 -2.756737

**<sup>1</sup>TS12-S**

B3LYP-D3BJ/BSI SCF energy in solution:

-2922.517859a.u.

M06/BSII SCF energy in solution: -2920.802255a.u.

M06/BSII free energy in solution: -2919.831643a.u.

B3LYP-D3BJ/BSI SCF energy in solution:

-2922.517859a.u.

B3LYP-D3BJ /BSII SCF energy in solution:

-2923.174778 a.u.

B3LYP-D3BJ /BSII free energy in solution:

-2922.204166 a.u.

C -0.399232 -2.358419 0.418862  
N -0.771116 -1.355129 -0.288746  
O -1.361962 -3.074410 1.032053  
C -2.644647 -2.617159 0.432303  
C -2.219982 -1.194367 -0.092338  
H -2.707615 -0.986731 -1.041787  
C -2.522154 -0.061129 0.864570  
C -3.758496 0.586867 0.771671  
C -1.642877 0.296426 1.892427  
C -4.126999 1.551805 1.707602  
H -4.438971 0.322971 -0.031123  
C -2.011216 1.260057 2.831321  
H -0.669350 -0.175464 1.964238  
C -3.257647 1.881834 2.748298  
H -5.089542 2.047029 1.621794

H -1.317535 1.528823 3.621632  
H -3.542113 2.635321 3.475419  
C 1.963058 -1.686087 0.466797  
N 1.918696 -0.751521 -0.413136  
O 2.972633 -1.635424 1.360282  
C 3.570537 -0.300203 1.235694  
C 3.118992 0.085822 -0.234189  
H 2.833346 1.135470 -0.252792  
C 4.145916 -0.152163 -1.318319  
C 5.140598 0.812410 -1.522413  
C 4.159386 -1.319344 -2.086967  
C 6.142499 0.607646 -2.467985  
H 5.135327 1.720537 -0.926105  
C 5.158665 -1.521966 -3.042006  
H 3.387939 -2.067450 -1.943979  
C 6.154020 -0.563033 -3.231638  
H 6.911594 1.360677 -2.611929  
H 5.157991 -2.431918 -3.634912  
H 6.932452 -0.722752 -3.971745  
Ni 0.415881 -0.529846 -1.752363  
C 1.018236 -2.866210 0.569174  
C 1.299782 -3.833582 -0.614357  
H 0.595082 -4.668398 -0.579349  
H 1.186592 -3.313100 -1.568654  
H 2.315982 -4.229645 -0.533987  
C 1.190161 -3.605165 1.907154  
H 2.215536 -3.965850 2.002659  
H 0.970330 -2.955783 2.757952  
H 0.514128 -4.460374 1.942467  
C 2.874606 0.609913 2.246447  
C 2.148961 0.073062 3.315975  
C 2.948981 2.003113 2.114170

|   |           |           |           |   |           |           |           |
|---|-----------|-----------|-----------|---|-----------|-----------|-----------|
| C | 1.491853  | 0.910751  | 4.219266  | C | -2.575854 | -3.368083 | -2.016633 |
| H | 2.094953  | -1.001180 | 3.441486  | C | -3.624701 | -5.857114 | -1.317618 |
| C | 2.299894  | 2.841039  | 3.021774  | H | -3.710661 | -5.084356 | 0.685915  |
| H | 3.514115  | 2.445649  | 1.300375  | C | -2.756744 | -4.352314 | -2.991254 |
| C | 1.560681  | 2.296999  | 4.073855  | H | -2.148179 | -2.418995 | -2.314662 |
| H | 0.926222  | 0.475071  | 5.037365  | C | -3.282349 | -5.597129 | -2.647279 |
| H | 2.367310  | 3.917735  | 2.900221  | H | -4.031138 | -6.824373 | -1.037141 |
| H | 1.047527  | 2.947900  | 4.775152  | H | -2.482334 | -4.138585 | -4.020071 |
| C | 5.066818  | -0.448292 | 1.441553  | H | -3.423521 | -6.360111 | -3.407146 |
| C | 5.831804  | 0.556946  | 2.040273  | C | 0.976716  | 2.765970  | -2.017165 |
| C | 5.714659  | -1.593114 | 0.955115  | C | -0.156660 | 3.673223  | -2.189921 |
| C | 7.219931  | 0.431097  | 2.132073  | N | -0.461120 | 3.585115  | -0.814647 |
| H | 5.354059  | 1.442741  | 2.440055  | C | -1.302839 | 4.281993  | 0.032741  |
| C | 7.097870  | -1.719864 | 1.051072  | C | -2.377119 | 5.028339  | -0.490413 |
| H | 5.133835  | -2.383365 | 0.496198  | C | -1.082669 | 4.252021  | 1.419710  |
| C | 7.858432  | -0.704222 | 1.635577  | C | -3.214337 | 5.724373  | 0.376106  |
| H | 7.797972  | 1.223264  | 2.598579  | H | -2.531837 | 5.052158  | -1.561742 |
| H | 7.581967  | -2.612323 | 0.665903  | C | -1.927638 | 4.962186  | 2.269116  |
| H | 8.937696  | -0.800987 | 1.706645  | H | -0.263814 | 3.666551  | 1.823211  |
| C | -3.705990 | -2.577623 | 1.504444  | C | -2.997977 | 5.699398  | 1.758104  |
| C | -5.053019 | -2.508235 | 1.128067  | H | -4.044703 | 6.292339  | -0.033830 |
| C | -3.369852 | -2.496112 | 2.858860  | H | -1.748813 | 4.932062  | 3.340174  |
| C | -6.047929 | -2.351868 | 2.091893  | H | -3.656306 | 6.246275  | 2.425997  |
| H | -5.322370 | -2.569608 | 0.078541  | C | 2.101123  | 2.373023  | -2.886156 |
| C | -4.367081 | -2.344495 | 3.822953  | H | 2.331121  | 1.307170  | -2.799867 |
| H | -2.329263 | -2.543965 | 3.156377  | H | 1.865136  | 2.591651  | -3.931452 |
| C | -5.707824 | -2.268243 | 3.443635  | H | 3.019839  | 2.922025  | -2.626824 |
| H | -7.088281 | -2.295230 | 1.785730  | C | -0.362647 | -0.358856 | -3.577220 |
| H | -4.093053 | -2.283248 | 4.872116  | H | -0.893232 | -1.304121 | -3.796304 |
| H | -6.482325 | -2.147316 | 4.195179  | H | 0.483105  | -0.360082 | -4.290203 |
| C | -2.927040 | -3.616858 | -0.683763 | C | -1.292506 | 0.813415  | -3.948810 |
| C | -3.445752 | -4.875641 | -0.345300 | H | -0.714030 | 1.743043  | -4.010754 |

H -1.735062 0.678799 -4.953615  
C -2.439259 1.043561 -2.959336  
H -3.029935 0.118739 -2.867689  
H -2.009366 1.229404 -1.966264  
C -3.368120 2.203246 -3.332257  
H -3.857434 1.992328 -4.294886  
H -2.759495 3.102867 -3.483841  
C -4.435202 2.495375 -2.272687  
H -5.067992 1.607060 -2.133685  
H -3.941956 2.671714 -1.309326  
C -5.313968 3.699171 -2.616131  
H -5.854312 3.545087 -3.558116  
H -6.057022 3.893899 -1.834291  
H -4.709072 4.606425 -2.730486  
C 0.693177 2.702138 -0.524281  
H 0.403450 1.727566 -0.118083  
H 1.445188 3.170769 0.121032  
O -0.677324 4.316413 -3.093236

**<sup>4</sup>TS12-S**

wB97XD/BSI SCF energy in gas:

-2921.28445a.u.

wB97XD/BSII SCF energy in solution:

-2921.942373a.u.

wB97XD/BSII free energy in solution:

-2920.952871a.u.

C -0.431399 -2.278014 0.371225  
N -0.890103 -1.382026 -0.417769  
O -1.252204 -2.713001 1.331065  
C -2.585005 -2.232888 0.976980  
C -2.224804 -1.007579 0.064736

H -2.897460 -0.965609 -0.785925  
C -2.221493 0.340646 0.743311  
C -3.394820 1.092540 0.723009  
C -1.110609 0.826332 1.431789  
C -3.464285 2.310829 1.388741  
H -4.256347 0.727365 0.169796  
C -1.182593 2.041818 2.101083  
H -0.174952 0.273503 1.432011  
C -2.357440 2.786759 2.082799  
H -4.376200 2.897452 1.346666  
H -0.305678 2.423895 2.611170  
H -2.391563 3.756690 2.567954  
C 1.932401 -1.751094 0.204236  
N 1.838793 -0.759056 -0.591155  
O 3.004691 -1.803654 1.008303  
C 3.617887 -0.484954 0.939936  
C 3.070868 0.016741 -0.451400  
H 2.818332 1.071648 -0.385144  
C 4.003676 -0.172351 -1.626749  
C 4.992449 0.787706 -1.848400  
C 3.936198 -1.283570 -2.464708  
C 5.914977 0.630102 -2.874503  
H 5.048073 1.657825 -1.199183  
C 4.855067 -1.439424 -3.499667  
H 3.155370 -2.023151 -2.319084  
C 5.849058 -0.487826 -3.703080  
H 6.682496 1.381204 -3.030783  
H 4.790748 -2.306127 -4.150162  
H 6.566786 -0.611787 -4.507681  
Ni 0.014278 -0.422859 -1.759123  
C 0.943395 -2.894304 0.300302  
C 1.017023 -3.733469 -0.997505

|   |           |           |           |   |           |           |           |
|---|-----------|-----------|-----------|---|-----------|-----------|-----------|
| H | 0.272526  | -4.532966 | -0.956006 | C | -5.378836 | -1.539910 | 3.476061  |
| H | 0.811274  | -3.107898 | -1.869821 | H | -5.280254 | -2.320203 | 1.481623  |
| H | 2.010124  | -4.181748 | -1.093020 | C | -3.274393 | -1.015350 | 4.513428  |
| C | 1.219732  | -3.773441 | 1.524878  | H | -1.525031 | -1.354265 | 3.317670  |
| H | 2.229048  | -4.183789 | 1.465086  | C | -4.664170 | -1.072286 | 4.573004  |
| H | 1.126734  | -3.212222 | 2.456571  | H | -6.462207 | -1.593858 | 3.512975  |
| H | 0.504860  | -4.597653 | 1.552480  | H | -2.707123 | -0.649268 | 5.363188  |
| C | 3.023280  | 0.349447  | 2.075814  | H | -5.185677 | -0.753789 | 5.469944  |
| C | 2.459063  | -0.275001 | 3.189280  | C | -3.255804 | -3.351962 | 0.181039  |
| C | 3.043577  | 1.745930  | 2.029038  | C | -2.913614 | -4.681909 | 0.436396  |
| C | 1.907311  | 0.478542  | 4.221226  | C | -4.238448 | -3.083142 | -0.773622 |
| H | 2.453826  | -1.357377 | 3.246808  | C | -3.523683 | -5.717120 | -0.263451 |
| C | 2.508630  | 2.500278  | 3.068452  | H | -2.166062 | -4.904589 | 1.189602  |
| H | 3.477838  | 2.261403  | 1.177147  | C | -4.852838 | -4.119614 | -1.470991 |
| C | 1.930881  | 1.868447  | 4.165411  | H | -4.542813 | -2.062198 | -0.981307 |
| H | 1.461308  | -0.023935 | 5.073587  | C | -4.493463 | -5.439772 | -1.222939 |
| H | 2.530183  | 3.583775  | 3.010509  | H | -3.243561 | -6.744928 | -0.054949 |
| H | 1.497656  | 2.456147  | 4.968011  | H | -5.609319 | -3.887980 | -2.213518 |
| C | 5.122482  | -0.664595 | 1.026902  | H | -4.967961 | -6.247931 | -1.770083 |
| C | 5.943265  | 0.301951  | 1.606003  | C | 0.353084  | 1.681009  | -1.942851 |
| C | 5.711538  | -1.791391 | 0.446456  | C | -0.659061 | 2.709778  | -2.086711 |
| C | 7.327963  | 0.153516  | 1.590013  | N | -0.087343 | 3.502311  | -1.055126 |
| H | 5.509383  | 1.174941  | 2.080097  | C | -0.581361 | 4.467405  | -0.206415 |
| C | 7.091604  | -1.941152 | 0.435471  | C | -1.839330 | 5.049306  | -0.436076 |
| H | 5.082993  | -2.549768 | -0.005354 | C | 0.174754  | 4.885050  | 0.898454  |
| C | 7.906948  | -0.965598 | 1.003788  | C | -2.325485 | 6.003976  | 0.445772  |
| H | 7.952258  | 0.916101  | 2.044657  | H | -2.408343 | 4.724988  | -1.299826 |
| H | 7.531663  | -2.821594 | -0.021561 | C | -0.330003 | 5.840416  | 1.772632  |
| H | 8.986022  | -1.081470 | 0.992801  | H | 1.151102  | 4.441455  | 1.071011  |
| C | -3.319057 | -1.884560 | 2.257936  | C | -1.584712 | 6.406073  | 1.558830  |
| C | -4.710009 | -1.947954 | 2.325634  | H | -3.302116 | 6.443029  | 0.261639  |
| C | -2.605902 | -1.417184 | 3.364285  | H | 0.266107  | 6.148311  | 2.627865  |



H -1.974201 7.155798 2.240045  
C 1.067308 1.063492 -3.122559  
H 1.091464 -0.075200 -3.193761  
H 0.612335 1.361818 -4.072054  
H 2.137906 1.301502 -3.132566  
C -1.141137 -1.188436 -3.121837  
H -1.721409 -2.012555 -2.685886  
H -0.449212 -1.638293 -3.848956  
C -2.069021 -0.195415 -3.820075  
H -1.511153 0.681763 -4.165614  
H -2.493214 -0.669083 -4.720282  
C -3.206662 0.307154 -2.938615  
H -3.799165 -0.553845 -2.586596  
H -2.767965 0.798049 -2.063504  
C -4.140324 1.304847 -3.615421  
H -4.685291 0.817621 -4.437344  
H -3.531308 2.104561 -4.048363  
C -5.128607 1.918750 -2.624962  
H -5.691118 1.117030 -2.122430  
H -4.552756 2.433608 -1.845518  
C -6.105114 2.897595 -3.272497  
H -6.696627 2.405682 -4.053001  
H -6.801572 3.318636 -2.540203  
H -5.566026 3.728163 -3.739806  
C 1.018227 2.568210 -0.878559  
H 1.068702 2.168511 0.143586  
H 1.993527 3.011677 -1.147271  
O -1.625130 2.963167 -2.792952

**<sup>3</sup>TS12-S**

B3LYP /BSI SCF energy in gas: -2922.095743a.u.

M06/BSII SCF energy in solution: -2920.790517a.u.

M06/BSII free energy in solution: -2919.833356a.u.

C -0.535578 -1.892881 1.142616  
N -0.922522 -1.133712 0.184821  
O -1.482249 -2.621466 1.779104  
C -2.693692 -2.550121 0.923669  
C -2.399707 -1.211672 0.136869  
H -2.711491 -1.312657 -0.902425  
C -3.047122 0.049653 0.688777  
C -4.297895 0.441165 0.193244  
C -2.442680 0.831332 1.679511  
C -4.937284 1.577527 0.686949  
H -4.771253 -0.142836 -0.590868  
C -3.075957 1.974950 2.168516  
H -1.460889 0.561945 2.054394  
C -4.326461 2.349459 1.676422  
H -5.904704 1.866720 0.286654  
H -2.583318 2.586319 2.918268  
H -4.809566 3.247621 2.048289  
C 1.894191 -1.236527 0.997022  
N 1.808086 -0.591705 -0.107755  
O 3.084218 -1.196676 1.644080  
C 3.915120 -0.183543 0.986005  
C 3.130610 0.006559 -0.390134  
H 2.980492 1.071984 -0.565068  
C 3.776354 -0.577942 -1.635096  
C 4.621671 0.231043 -2.404794  
C 3.563720 -1.901922 -2.036016  
C 5.250922 -0.271424 -3.543739  
H 4.788865 1.265648 -2.114375  
C 4.187509 -2.405806 -3.177823  
H 2.887764 -2.533942 -1.470437

|    |          |           |           |   |           |           |           |
|----|----------|-----------|-----------|---|-----------|-----------|-----------|
| C  | 5.034773 | -1.593865 | -3.933467 | C | 7.930315  | -1.801155 | 0.616600  |
| H  | 5.901203 | 0.371882  | -4.129400 | H | 8.573815  | 0.255665  | 0.553938  |
| H  | 4.003696 | -3.432421 | -3.481109 | H | 6.974816  | -3.731138 | 0.722263  |
| H  | 5.516334 | -1.986173 | -4.824374 | H | 8.932757  | -2.207389 | 0.518820  |
| Ni | 0.235526 | -0.545113 | -1.433392 | C | -3.922260 | -2.513742 | 1.815414  |
| C  | 0.869023 | -2.140806 | 1.652818  | C | -5.183291 | -2.772311 | 1.259012  |
| C  | 1.251886 | -3.613997 | 1.321113  | C | -3.837134 | -2.186993 | 3.172920  |
| H  | 0.533710 | -4.291898 | 1.786587  | C | -6.333810 | -2.697881 | 2.042424  |
| H  | 1.239526 | -3.785352 | 0.241490  | H | -5.263826 | -3.041991 | 0.210307  |
| H  | 2.250073 | -3.834330 | 1.707889  | C | -4.989284 | -2.122291 | 3.958845  |
| C  | 0.886268 | -1.937758 | 3.190045  | H | -2.868175 | -1.986853 | 3.614288  |
| H  | 1.870983 | -2.189282 | 3.586998  | C | -6.240782 | -2.374511 | 3.397541  |
| H  | 0.659786 | -0.901168 | 3.456136  | H | -7.302399 | -2.898825 | 1.593854  |
| H  | 0.141734 | -2.587456 | 3.652697  | H | -4.905010 | -1.872016 | 5.012567  |
| C  | 3.865494 | 1.078550  | 1.859977  | H | -7.136282 | -2.322150 | 4.009925  |
| C  | 3.692717 | 0.956863  | 3.246202  | C | -2.634988 | -3.809662 | 0.045995  |
| C  | 4.048888 | 2.360054  | 1.322864  | C | -2.965001 | -5.045572 | 0.628166  |
| C  | 3.679288 | 2.084553  | 4.066343  | C | -2.172312 | -3.797914 | -1.277546 |
| H  | 3.564930 | -0.027570 | 3.681056  | C | -2.853947 | -6.231212 | -0.094182 |
| C  | 4.045348 | 3.490006  | 2.144900  | H | -3.315429 | -5.074341 | 1.654864  |
| H  | 4.205184 | 2.494291  | 0.256837  | C | -2.064874 | -4.988931 | -2.002559 |
| C  | 3.853426 | 3.357269  | 3.519728  | H | -1.873697 | -2.875419 | -1.763262 |
| H  | 3.536481 | 1.966477  | 5.136667  | C | -2.406686 | -6.206562 | -1.417621 |
| H  | 4.191595 | 4.472449  | 1.705477  | H | -3.120462 | -7.173881 | 0.375441  |
| H  | 3.844684 | 4.235199  | 4.158723  | H | -1.710561 | -4.953549 | -3.028620 |
| C  | 5.332301 | -0.748012 | 0.876884  | H | -2.325818 | -7.129168 | -1.985367 |
| C  | 6.441559 | 0.100920  | 0.769871  | C | 0.721498  | 3.196023  | -2.043205 |
| C  | 5.544963 | -2.132885 | 0.855706  | C | -0.593903 | 3.829621  | -1.944086 |
| C  | 7.728293 | -0.421303 | 0.635151  | N | -0.379619 | 4.084840  | -0.562157 |
| H  | 6.309326 | 1.176506  | 0.803709  | C | -1.072335 | 4.766108  | 0.421901  |
| C  | 6.832397 | -2.654290 | 0.730298  | C | -2.328564 | 5.340384  | 0.137696  |
| H  | 4.701274 | -2.805913 | 0.948378  | C | -0.525022 | 4.896879  | 1.712024  |

C -3.010154 6.026978 1.137045  
H -2.738251 5.234127 -0.859785  
C -1.226731 5.587351 2.698951  
H 0.443481 4.458845 1.934894  
C -2.471690 6.156424 2.422256  
H -3.975754 6.469787 0.907673  
H -0.792513 5.683602 3.690712  
H -3.012163 6.697209 3.193274  
C 1.593888 2.825525 -3.178663  
H 1.992965 1.808568 -3.082799  
H 1.030340 2.874120 -4.113699  
H 2.453812 3.509239 -3.264123  
C -0.280337 -0.648320 -3.349450  
H -0.662300 -1.668521 -3.540514  
H 0.691976 -0.628400 -3.873623  
C -1.215916 0.358944 -4.043883  
H -0.808405 1.374223 -3.962247  
H -1.279384 0.151063 -5.127659  
C -2.648403 0.391526 -3.497939  
H -3.083843 -0.619871 -3.559936  
H -2.615680 0.654362 -2.431810  
C -3.559809 1.384004 -4.232518  
H -3.568403 1.143810 -5.306422  
H -3.127831 2.389248 -4.140855  
C -5.003176 1.406938 -3.713964  
H -5.433412 0.396877 -3.784700  
H -4.995903 1.662851 -2.645752  
C -5.901537 2.395049 -4.465836  
H -5.954870 2.147721 -5.532731  
H -6.924899 2.393884 -4.073458  
H -5.513928 3.416891 -4.385091  
C 0.970195 3.487294 -0.570609

H 1.075520 2.621759 0.094541  
H 1.769573 4.211998 -0.351875  
O -1.531768 4.103892 -2.673876

**1a**

B3LYP/BSI SCF energy: -443.626262a.u.

M06/BSII SCF energy in solution: -443.389673a.u.

M06/BSII free energy in solution: -443.216755a.u.

C 1.655233 1.068081 -0.292797  
H 1.487017 1.536257 0.690403  
H 1.725032 1.858538 -1.049802  
N 0.694496 0.000117 -0.599971  
C -0.651460 0.000020 -0.266079  
C -1.352677 1.211557 -0.108171  
C -1.352546 -1.211544 -0.108073  
C -2.712329 1.202899 0.194766  
H -0.829428 2.155083 -0.231078  
C -2.712234 -1.202988 0.194843  
H -0.829249 -2.155058 -0.230876  
C -3.405038 -0.000083 0.350263  
H -3.234157 2.149094 0.312360  
H -3.233949 -2.149238 0.312500  
H -4.464274 -0.000110 0.587733  
C 3.750188 -0.000133 0.900275  
H 4.397128 -0.884333 0.881397  
H 4.397401 0.883870 0.881555  
H 3.211187 -0.000133 1.854258  
C 2.785893 0.000099 -0.276118  
H 3.337541 0.000343 -1.221548  
C 1.655312 -1.067984 -0.293262  
H 1.725148 -1.858034 -1.050705

H 1.487086 -1.536641 0.689711

**1a'**

B3LYP/BSI SCF energy: -442.959445a.u.

M06/BSII SCF energy in solution: -442.725588a.u.

M06/BSII free energy in solution: -442.568679a.u.

C 1.668739 1.072605 -0.224470

H 1.408824 1.610536 0.707371

H 1.823305 1.824836 -1.013382

N 0.712621 -0.000019 -0.574072

C -0.636812 0.000003 -0.254651

C -1.341579 1.211446 -0.108212

C -1.341603 -1.211438 -0.108226

C -2.704914 1.202745 0.177307

H -0.818547 2.155378 -0.228162

C -2.704929 -1.202723 0.177291

H -0.818577 -2.155371 -0.228198

C -3.399631 0.000020 0.324902

H -3.228166 2.149127 0.286586

H -3.228206 -2.149092 0.286557

H -4.461877 0.000025 0.548386

C 4.050305 0.000027 0.583085

H 4.631894 -0.886320 0.304198

H 4.631803 0.886397 0.304069

H 3.979723 0.000103 1.685445

C 2.718333 -0.000049 -0.064064

C 1.668678 -1.072637 -0.224401

H 1.823193 -1.824979 -1.013227

H 1.408755 -1.610501 0.707490

**1b**

B3LYP/BSI SCF energy: -517.669019a.u.

M06/BSII SCF energy in solution: -517.43722a.u.

M06/BSII free energy in solution: -517.283454a.u.

C -1.607374 0.769265 -0.228421

C -1.504298 -1.332495 -0.289145

H -1.500628 -1.971230 0.601681

H -1.338279 -1.944386 -1.182331

N -0.595719 -0.179418 -0.184902

O -1.593391 1.979152 -0.163259

C 0.797065 -0.108031 -0.064538

C 1.554602 -1.287959 -0.038946

C 1.437094 1.140205 0.029124

C 2.942507 -1.218928 0.078842

H 1.059960 -2.251864 -0.110751

C 2.823765 1.188317 0.146136

H 0.839527 2.043785 0.010186

C 3.585004 0.016156 0.171653

H 3.521210 -2.138117 0.097805

H 3.314175 2.155036 0.218410

H 4.665676 0.066058 0.263112

C -3.745488 -0.364968 0.732156

H -4.364764 0.536122 0.695500

H -4.401106 -1.234314 0.618138

H -3.282927 -0.413322 1.723683

C -2.689407 -0.322582 -0.366520

H -3.156510 -0.298937 -1.357100

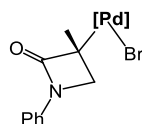

B3LYP/BSI SCF energy: -2656.08749a.u.

M06/BSII SCF energy in solution: -2654.849682a.u.

M06/BSII free energy in solution: -2654.05067a.u.

C -0.248695 1.952373 0.014822  
N -0.808214 0.813787 0.245363  
O -1.075927 3.010324 -0.122285  
C -2.402024 2.576710 0.365504  
C -2.277934 1.034230 0.128785  
C 2.186637 1.229904 -0.188219  
N 1.988333 -0.029800 -0.066027  
O 3.462482 1.631139 -0.378465  
C 4.228452 0.403648 -0.716191  
C 3.326521 -0.680609 -0.031317  
C 1.201995 2.372200 -0.128838  
C 1.346160 3.208898 -1.432869  
H 0.696049 4.082975 -1.388661  
H 1.079930 2.615557 -2.312484  
H 2.381340 3.534010 -1.541395  
C 1.564727 3.259129 1.099373  
H 2.584843 3.633587 0.994542  
H 1.488918 2.690884 2.030673  
H 0.876094 4.103676 1.156379  
C 5.634141 0.525041 -0.154795  
C 6.592638 -0.429900 -0.523810  
C 5.998184 1.543503 0.731532  
C 7.885241 -0.372359 -0.007043  
H 6.327260 -1.215744 -1.224866  
C 7.297696 1.605822 1.240288  
H 5.267402 2.289611 1.019794  
C 8.243652 0.648603 0.876340  
H 8.614404 -1.122152 -0.299840  
H 7.567039 2.406295 1.923465

H 9.253033 0.697467 1.274262  
C 4.222444 0.331058 -2.250973  
C 3.408797 -0.550349 -2.976737  
C 5.017247 1.248539 -2.958683  
C 3.404154 -0.519765 -4.375273  
H 2.767853 -1.269416 -2.477678  
C 5.006985 1.280656 -4.350624  
H 5.651006 1.938205 -2.409872  
C 4.200130 0.391642 -5.065979  
H 2.772886 -1.217394 -4.917823  
H 5.632428 1.995998 -4.877101  
H 4.195654 0.409745 -6.152071  
C -2.451180 2.988303 1.846027  
C -2.674959 2.096130 2.901489  
C -2.247490 4.348198 2.140094  
C -2.689933 2.561625 4.222196  
H -2.846576 1.039232 2.726631  
C -2.255599 4.804912 3.454517  
H -2.085265 5.049078 1.326585  
C -2.478354 3.908676 4.504468  
H -2.868537 1.855922 5.028293  
H -2.095667 5.859602 3.660177  
H -2.490575 4.262011 5.531633  
C -3.478487 3.282639 -0.443689  
C -3.202006 3.884460 -1.676241  
C -4.792175 3.308139 0.044899  
C -4.220349 4.502130 -2.404676  
H -2.190406 3.873585 -2.064255  
C -5.809751 3.914816 -0.689519  
H -5.017067 2.859776 1.007845  
C -5.526855 4.517373 -1.916868  
H -3.988494 4.970891 -3.356819

H -6.822616 3.922904 -0.297416  
H -6.317929 4.997048 -2.485890  
C -1.369484 -2.333280 1.107338  
C -2.821541 -1.915408 1.337454  
C -1.974309 -3.450187 0.194998  
H -1.800970 -4.475284 0.538860  
H -1.749037 -3.368005 -0.868675  
N -3.311319 -2.934853 0.552437  
O -3.418570 -1.085178 2.019025  
C -4.594624 -3.394469 0.248924  
C -4.750178 -4.469046 -0.641086  
C -5.730114 -2.796825 0.826827  
C -6.026417 -4.934160 -0.953183  
H -3.874463 -4.931284 -1.085495  
C -6.997460 -3.274005 0.500044  
H -5.597602 -1.978266 1.523825  
C -7.157165 -4.340777 -0.388681  
H -6.134579 -5.766265 -1.643342  
H -7.869817 -2.808818 0.951184  
H -8.149416 -4.706922 -0.634413  
C -0.755559 -2.826196 2.428127  
H 0.197560 -3.331028 2.262863  
H -1.436393 -3.534617 2.926240  
H -0.596215 -1.990539 3.116946  
H -2.780566 0.494031 0.922641  
C -2.810833 0.518892 -1.201448  
C -4.109127 -0.006019 -1.243216  
C -2.064373 0.560666 -2.385773  
C -4.654127 -0.468390 -2.440945  
H -4.689277 -0.069187 -0.327940  
C -2.607388 0.098427 -3.585260  
H -1.046348 0.935402 -2.376047

C -3.904646 -0.415524 -3.617161  
H -5.657774 -0.882822 -2.448244  
H -2.012178 0.134013 -4.493404  
H -4.324440 -0.781150 -4.549909  
H 3.289741 -1.588949 -0.627577  
C 3.708700 -1.082432 1.386021  
C 4.306396 -2.330984 1.595826  
C 3.497593 -0.245196 2.488600  
C 4.695066 -2.730598 2.874566  
H 4.450231 -3.001929 0.754420  
C 3.880996 -0.643597 3.769504  
H 3.024883 0.722238 2.354955  
C 4.483072 -1.887656 3.966211  
H 5.152049 -3.705460 3.017593  
H 3.708279 0.018321 4.613489  
H 4.778624 -2.199602 4.963828  
Br 1.214870 -3.307029 -0.489590  
Pd 0.126345 -1.129415 0.300589

**<sup>2</sup>[Pd]-Br**

B3LYP/BSI SCF energy: -2139.019324a.u.

M06/BSII SCF energy in solution: -2138.005027a.u.

M06/BSII free energy in solution: -2137.376969a.u.

C 1.219063 0.371400 -1.017437  
N 1.366689 -0.120170 0.154588  
O 2.339668 0.757872 -1.664732  
C 3.480385 0.194350 -0.889781  
C 2.797807 -0.035008 0.515205  
H 3.101804 -0.994197 0.931977  
C 3.024806 1.016354 1.588889  
C 3.770009 0.677870 2.723935

|   |           |           |           |   |           |           |           |
|---|-----------|-----------|-----------|---|-----------|-----------|-----------|
| C | 2.496260  | 2.309989  | 1.489618  | H | -0.904659 | 1.897722  | -3.273379 |
| C | 3.995905  | 1.614537  | 3.734057  | H | 0.014354  | 2.695044  | -1.988400 |
| H | 4.158928  | -0.331466 | 2.826305  | H | 0.868861  | 1.824019  | -3.275364 |
| C | 2.719175  | 3.247089  | 2.497406  | C | -3.609036 | 2.464669  | 0.252730  |
| H | 1.903606  | 2.589584  | 0.623755  | C | -3.340596 | 3.632893  | -0.475377 |
| C | 3.472249  | 2.902433  | 3.622397  | C | -4.084532 | 2.588541  | 1.564353  |
| H | 4.570900  | 1.332048  | 4.611094  | C | -3.523608 | 4.888547  | 0.101324  |
| H | 2.303201  | 4.246525  | 2.405624  | H | -2.982557 | 3.554803  | -1.495752 |
| H | 3.642405  | 3.631869  | 4.409161  | C | -4.276207 | 3.847212  | 2.139161  |
| C | -1.305973 | 0.467180  | -0.946658 | H | -4.314818 | 1.706979  | 2.154452  |
| N | -1.517149 | -0.252078 | 0.091900  | C | -3.992291 | 5.001751  | 1.411826  |
| O | -2.335422 | 1.224466  | -1.379844 | H | -3.301743 | 5.781013  | -0.476822 |
| C | -3.445386 | 1.099271  | -0.426880 | H | -4.642343 | 3.918936  | 3.159047  |
| C | -2.897292 | -0.025256 | 0.566039  | H | -4.134621 | 5.980353  | 1.860474  |
| H | -2.818490 | 0.401903  | 1.567088  | C | -4.702727 | 0.733075  | -1.219937 |
| C | -3.674357 | -1.322658 | 0.678429  | C | -5.956703 | 0.753532  | -0.593348 |
| C | -4.393291 | -1.593082 | 1.848133  | C | -4.633492 | 0.371559  | -2.570192 |
| C | -3.677690 | -2.271905 | -0.352180 | C | -7.108723 | 0.406515  | -1.295833 |
| C | -5.113960 | -2.780977 | 1.985085  | H | -6.039377 | 1.048042  | 0.447223  |
| H | -4.377563 | -0.877455 | 2.666918  | C | -5.790053 | 0.031962  | -3.275881 |
| C | -4.393156 | -3.460172 | -0.216792 | H | -3.675870 | 0.365023  | -3.076608 |
| H | -3.113110 | -2.085750 | -1.260133 | C | -7.031190 | 0.044499  | -2.642222 |
| C | -5.115600 | -3.716939 | 0.951131  | H | -8.069676 | 0.425143  | -0.790107 |
| H | -5.661098 | -2.977929 | 2.902267  | H | -5.715202 | -0.241222 | -4.324637 |
| H | -4.382981 | -4.189280 | -1.021631 | H | -7.930147 | -0.220794 | -3.190737 |
| H | -5.668607 | -4.645606 | 1.056709  | C | 4.620573  | 1.197764  | -0.895095 |
| C | -0.062579 | 0.505075  | -1.826767 | C | 5.849309  | 0.822143  | -0.332701 |
| C | -0.127512 | -0.712718 | -2.797044 | C | 4.486183  | 2.481167  | -1.433342 |
| H | 0.765771  | -0.726520 | -3.426279 | C | 6.916561  | 1.716689  | -0.300238 |
| H | -0.180078 | -1.649657 | -2.237383 | H | 5.972146  | -0.177563 | 0.073680  |
| H | -1.007685 | -0.628701 | -3.441436 | C | 5.560673  | 3.374151  | -1.408135 |
| C | -0.018668 | 1.818848  | -2.641937 | H | 3.543387  | 2.779558  | -1.876454 |

C 6.776761 2.997539 -0.840455  
H 7.859976 1.410906 0.142573  
H 5.442100 4.366196 -1.834823  
H 7.610651 3.693136 -0.820352  
C 3.851959 -1.106960 -1.616727  
C 4.540813 -1.009476 -2.838198  
C 3.463878 -2.376831 -1.166024  
C 4.842140 -2.146307 -3.583490  
H 4.845530 -0.033470 -3.202374  
C 3.773050 -3.517591 -1.914171  
H 2.918356 -2.514367 -0.238030  
C 4.461102 -3.408786 -3.120746  
H 5.379436 -2.046949 -4.522489  
H 3.468901 -4.490530 -1.539846  
H 4.701558 -4.298061 -3.696510  
Br 1.365725 -3.153495 2.311140  
Pd -0.086883 -1.477468 1.102602

### <sup>2</sup>TS13

B3LYP/BSI SCF energy: -5377.934524a.u.

M06/BSII SCF energy in solution: -5376.837258a.u.

M06/BSII free energy in solution: -5375.99452a.u.

C -1.117930 1.865566 -1.273914  
N -0.454055 1.272614 -0.348062  
O -0.594660 3.013441 -1.759429  
C 0.792586 3.070849 -1.239193  
C 0.648742 2.195519 0.051394  
H 1.542091 1.607560 0.246684  
C 0.273039 2.914782 1.341127  
C 1.089490 2.745080 2.466427  
C -0.874040 3.714541 1.450909

C 0.770385 3.372211 3.673738  
H 1.963398 2.104864 2.385049  
C -1.191101 4.339770 2.655440  
H -1.521046 3.863395 0.592115  
C -0.368304 4.170970 3.772047  
H 1.412851 3.230120 4.538467  
H -2.082159 4.957603 2.722770  
H -0.616955 4.657984 4.711011  
C -3.183939 0.513829 -0.961346  
N -2.688546 -0.449044 -0.279463  
O -4.516896 0.714884 -0.869093  
C -4.988797 -0.093379 0.267307  
C -3.803830 -1.143418 0.402735  
H -3.531947 -1.260215 1.451018  
C -4.058288 -2.525218 -0.172053  
C -4.287877 -3.595528 0.698213  
C -4.089783 -2.759585 -1.551154  
C -4.551051 -4.873953 0.204968  
H -4.249051 -3.432314 1.772529  
C -4.351015 -4.035010 -2.048399  
H -3.893106 -1.947363 -2.243619  
C -4.583975 -5.096675 -1.171670  
H -4.721065 -5.694618 0.895882  
H -4.367222 -4.202118 -3.121659  
H -4.782906 -6.091363 -1.559848  
C -2.423802 1.421254 -1.918168  
C -2.091547 0.613611 -3.206333  
H -1.465523 1.215346 -3.870771  
H -1.568194 -0.311967 -2.954452  
H -3.015343 0.359151 -3.734862  
C -3.268879 2.660220 -2.288690  
H -4.201769 2.344921 -2.759252



|    |           |           |           |   |           |           |           |
|----|-----------|-----------|-----------|---|-----------|-----------|-----------|
| H  | -3.516838 | 3.255595  | -1.406476 | C | -6.861092 | -0.598629 | -1.393768 |
| H  | -2.714868 | 3.288513  | -2.987115 | C | -8.375815 | -1.832290 | 0.592044  |
| Ni | -0.652367 | -0.680326 | 0.025434  | H | -6.769083 | -1.332229 | 1.922129  |
| Br | -0.318945 | -3.092387 | -0.363183 | C | -8.112415 | -1.137475 | -1.699456 |
| Si | 3.166649  | -0.874521 | 1.231634  | H | -6.277490 | -0.117219 | -2.169050 |
| H  | 1.706425  | -0.432245 | 0.844642  | C | -8.873322 | -1.758833 | -0.710354 |
| O  | 4.767316  | -1.219899 | 1.925305  | H | -8.959687 | -2.309879 | 1.373511  |
| O  | 2.448995  | -2.023077 | 2.337459  | H | -8.489796 | -1.069476 | -2.715878 |
| C  | 5.120838  | -2.191592 | 2.882957  | H | -9.845998 | -2.178611 | -0.949434 |
| H  | 5.460176  | -3.111528 | 2.373186  | C | -5.092612 | 0.858268  | 1.470742  |
| H  | 4.257852  | -2.470812 | 3.493806  | C | -5.508537 | 2.181079  | 1.254366  |
| C  | 6.226862  | -1.673672 | 3.808035  | C | -4.857486 | 0.440909  | 2.786545  |
| H  | 6.505121  | -2.439993 | 4.541375  | C | -5.661788 | 3.064973  | 2.320470  |
| H  | 7.142922  | -1.394023 | 3.266642  | H | -5.711885 | 2.515235  | 0.242977  |
| H  | 5.892076  | -0.782607 | 4.348640  | C | -5.017169 | 1.325486  | 3.856518  |
| C  | 1.180526  | -1.893552 | 2.941903  | H | -4.550056 | -0.577643 | 3.000291  |
| H  | 0.508583  | -1.285021 | 2.314290  | C | -5.414737 | 2.641192  | 3.628041  |
| H  | 0.724763  | -2.892293 | 3.006441  | H | -5.980457 | 4.085777  | 2.129149  |
| C  | 1.274888  | -1.276423 | 4.336430  | H | -4.823028 | 0.980392  | 4.867752  |
| H  | 1.669115  | -0.256137 | 4.281776  | H | -5.533895 | 3.329410  | 4.459556  |
| H  | 0.285035  | -1.233806 | 4.807302  | C | 1.181464  | 4.525796  | -1.033256 |
| H  | 1.937489  | -1.863559 | 4.981704  | C | 2.420840  | 4.818737  | -0.446578 |
| O  | 3.484972  | 0.834061  | 1.310147  | C | 0.357006  | 5.579597  | -1.440108 |
| C  | 4.679348  | 1.510465  | 1.677961  | C | 2.821057  | 6.140383  | -0.263519 |
| H  | 4.384511  | 2.466765  | 2.136855  | H | 3.074201  | 4.011762  | -0.129168 |
| H  | 5.222375  | 0.933106  | 2.430770  | C | 0.763068  | 6.904134  | -1.259517 |
| C  | 5.587496  | 1.782541  | 0.476051  | H | -0.603303 | 5.366167  | -1.894532 |
| H  | 5.749353  | 0.867912  | -0.104588 | C | 1.993745  | 7.189845  | -0.670850 |
| H  | 5.143583  | 2.513412  | -0.208395 | H | 3.781846  | 6.350016  | 0.197533  |
| H  | 6.554041  | 2.186141  | 0.806561  | H | 0.111424  | 7.711897  | -1.580912 |
| C  | -6.356622 | -0.667481 | -0.090306 | H | 2.307991  | 8.219961  | -0.530301 |
| C  | -7.131632 | -1.285671 | 0.900484  | C | 1.687272  | 2.416621  | -2.310317 |

C 1.417875 2.664568 -3.666647  
C 2.791413 1.618792 -1.979407  
C 2.218535 2.106579 -4.663275  
H 0.580037 3.298065 -3.939625  
C 3.602421 1.059203 -2.978113  
H 3.039454 1.403278 -0.945595  
C 3.309618 1.298334 -4.323085  
H 1.994110 2.309448 -5.707297  
H 4.429774 0.409809 -2.684747  
H 3.931691 0.862599 -5.100107  
O 3.714683 -3.032253 -2.271815  
P 4.600673 -2.389840 -1.192704  
O 5.201855 -3.409800 -0.192666  
O 5.589653 -1.293886 -1.620828  
O 3.389883 -1.574900 -0.291071  
K 1.726835 -1.475375 -2.397194  
K 7.052749 -1.712311 0.431888  
K 2.715762 -4.191423 0.370911

**<sup>2</sup>TS13-Br**

B3LYP/BSI SCF energy: -2712.507852a.u.

M06/BSII SCF energy in solution: -2711.2742a.u.

M06/BSII free energy in solution: -2710.483708a.u.

C 0.375327 2.181132 0.303344  
N -0.290696 1.144729 -0.050684  
O -0.336880 3.253700 0.689113  
C -1.747753 2.834850 0.825081  
C -1.738923 1.452288 0.051502  
C 2.681052 1.142921 0.099544  
N 2.272259 -0.037503 -0.188245  
O 4.011093 1.315031 0.208764

C 4.645045 0.086148 -0.348993  
C 3.451431 -0.937218 -0.235925  
Ni 0.404303 -0.602910 -0.746905  
C 1.876328 2.410826 0.308521  
C 2.219652 3.393954 -0.848606  
H 1.683375 4.334438 -0.704837  
H 1.942528 2.971380 -1.818276  
H 3.292923 3.593095 -0.852567  
C 2.288589 3.038065 1.667676  
H 3.364573 3.218613 1.677196  
H 2.032927 2.377196 2.500877  
H 1.768353 3.985891 1.809816  
C 5.866531 -0.257908 0.485134  
C 6.654294 -1.353219 0.101780  
C 6.233342 0.477729 1.615806  
C 7.777520 -1.711375 0.843479  
H 6.390537 -1.924121 -0.783800  
C 7.365042 0.121659 2.354414  
H 5.636699 1.330228 1.918242  
C 8.138147 -0.973764 1.974067  
H 8.373672 -2.565443 0.535805  
H 7.638724 0.705308 3.228800  
H 9.016283 -1.250902 2.549884  
C 5.012850 0.449054 -1.795887  
C 4.194557 0.129157 -2.889826  
C 6.169276 1.213664 -2.023573  
C 4.537944 0.551969 -4.177459  
H 3.283953 -0.449541 -2.771577  
C 6.506209 1.637119 -3.307099  
H 6.811742 1.472510 -1.188303  
C 5.691563 1.303836 -4.391917  
H 3.893680 0.284770 -5.009886

|   |           |           |           |   |           |           |           |
|---|-----------|-----------|-----------|---|-----------|-----------|-----------|
| H | 7.408199  | 2.222859  | -3.460133 | C | -5.676275 | -4.353074 | -1.104142 |
| H | 5.956582  | 1.626726  | -5.394668 | C | -6.472724 | -2.124123 | -0.539074 |
| C | -2.016743 | 2.694249  | 2.331497  | C | -6.666338 | -4.452025 | -2.079655 |
| C | -2.865437 | 1.712704  | 2.857705  | H | -4.980953 | -5.171350 | -0.945833 |
| C | -1.447571 | 3.634634  | 3.205030  | C | -7.453968 | -2.242561 | -1.520003 |
| C | -3.122392 | 1.667569  | 4.231822  | H | -6.391340 | -1.234947 | 0.074398  |
| H | -3.346746 | 0.967991  | 2.232080  | C | -7.559273 | -3.400907 | -2.295911 |
| C | -1.698459 | 3.579704  | 4.574138  | H | -6.736033 | -5.357648 | -2.675442 |
| H | -0.806622 | 4.414286  | 2.807260  | H | -8.148920 | -1.421534 | -1.674003 |
| C | -2.538288 | 2.592140  | 5.094951  | H | -8.328795 | -3.483236 | -3.057292 |
| H | -3.785446 | 0.897698  | 4.615357  | C | -2.550142 | -3.022234 | 3.421781  |
| H | -1.242840 | 4.313199  | 5.233558  | H | -2.328198 | -2.026649 | 3.813811  |
| H | -2.737459 | 2.549676  | 6.161963  | H | -1.638566 | -3.624282 | 3.472300  |
| C | -2.628878 | 3.925498  | 0.222233  | H | -3.299152 | -3.488897 | 4.081472  |
| C | -2.089319 | 5.008516  | -0.479434 | H | -2.182330 | 0.677044  | 0.673794  |
| C | -4.020025 | 3.844097  | 0.376323  | C | -2.406003 | 1.390413  | -1.310823 |
| C | -2.924252 | 5.989535  | -1.019731 | C | -3.596354 | 0.666174  | -1.446943 |
| H | -1.015714 | 5.091732  | -0.599539 | C | -1.855883 | 2.014364  | -2.438477 |
| C | -4.851516 | 4.818295  | -0.171627 | C | -4.229078 | 0.570169  | -2.687495 |
| H | -4.455840 | 3.019935  | 0.931785  | H | -4.021773 | 0.167121  | -0.580617 |
| C | -4.306947 | 5.897480  | -0.871241 | C | -2.487392 | 1.918437  | -3.677773 |
| H | -2.487564 | 6.826420  | -1.557536 | H | -0.928671 | 2.573882  | -2.354682 |
| H | -5.927165 | 4.735649  | -0.046299 | C | -3.675696 | 1.195346  | -3.805075 |
| H | -4.955526 | 6.659666  | -1.293145 | H | -5.143959 | -0.008176 | -2.777208 |
| C | -3.067458 | -2.932939 | 2.030112  | H | -2.048817 | 2.403417  | -4.545170 |
| C | -4.138904 | -2.063483 | 1.483450  | H | -4.161628 | 1.114114  | -4.773173 |
| C | -3.572424 | -4.056778 | 1.123070  | H | 3.380575  | -1.535829 | -1.142735 |
| H | -4.013632 | -4.919540 | 1.640510  | C | 3.442685  | -1.893969 | 0.944083  |
| H | -2.874731 | -4.390921 | 0.349951  | C | 3.494279  | -3.270534 | 0.699496  |
| N | -4.582820 | -3.087246 | 0.644471  | C | 3.354176  | -1.444491 | 2.268139  |
| O | -4.538626 | -0.914902 | 1.635572  | C | 3.474259  | -4.182538 | 1.756166  |
| C | -5.570234 | -3.185312 | -0.330903 | H | 3.529484  | -3.630801 | -0.324807 |

C 3.333792 -2.352696 3.324685  
H 3.302213 -0.380802 2.479688  
C 3.396201 -3.725368 3.071414  
H 3.508847 -5.247953 1.548315  
H 3.266766 -1.989634 4.346268  
H 3.376947 -4.432733 3.895599  
Br 0.849793 -2.134312 -2.523504  
Br -1.029798 -1.983745 0.765408

**K-<sup>2</sup>TS13-Br**

B3LYP/BSI SCF energy: -5154.763112a.u.

M06/BSII SCF energy in solution: -5153.578684a.u.

M06/BSII free energy in solution: -5152.783033a.u.

C -1.157243 2.019029 -0.422541  
N -0.687163 0.990043 0.183148  
O -0.272381 2.935726 -0.847452  
C 1.093820 2.394862 -0.638182  
C 0.787528 1.125220 0.282972  
C -3.601386 1.304826 -0.438697  
N -3.409053 0.146505 0.073469  
O -4.872680 1.627374 -0.752902  
C -5.739299 0.611404 -0.094806  
C -4.710130 -0.565699 0.106877  
Ni -1.763712 -0.484420 1.050010  
C -2.596861 2.401233 -0.730631  
C -2.962934 3.637380 0.141192  
H -2.285927 4.463103 -0.086602  
H -2.886816 3.401511 1.206290  
H -3.987939 3.945559 -0.072016  
C -2.704585 2.771010 -2.235971  
H -3.726597 3.076780 -2.466197

H -2.440314 1.919100 -2.869455  
H -2.024337 3.592093 -2.464544  
C -6.909295 0.292427 -1.009127  
C -7.884464 -0.609559 -0.559052  
C -7.053164 0.869908 -2.274050  
C -8.972608 -0.936604 -1.364425  
H -7.794114 -1.052234 0.428662  
C -8.149593 0.546220 -3.078196  
H -6.310468 1.574664 -2.629077  
C -9.110037 -0.358330 -2.629044  
H -9.715961 -1.640826 -1.002387  
H -8.249025 1.005881 -4.057505  
H -9.960818 -0.609998 -3.255472  
C -6.197928 1.266892 1.217893  
C -5.578962 1.016425 2.451560  
C -7.220480 2.229135 1.162856  
C -5.986777 1.703011 3.599560  
H -4.776207 0.293167 2.553767  
C -7.621199 2.914345 2.307255  
H -7.707886 2.437814 0.216039  
C -7.006304 2.650618 3.533773  
H -5.497568 1.485953 4.544510  
H -8.417504 3.650444 2.241747  
H -7.322227 3.178717 4.429003  
C 1.558172 2.004714 -2.051207  
C 0.973757 0.900960 -2.700676  
C 2.469329 2.790078 -2.768003  
C 1.277446 0.612049 -4.032562  
H 0.273072 0.257235 -2.178715  
C 2.789212 2.490815 -4.095217  
H 2.940635 3.637812 -2.285947  
C 2.187045 1.407586 -4.738001

|   |          |           |           |    |           |           |           |
|---|----------|-----------|-----------|----|-----------|-----------|-----------|
| H | 0.805183 | -0.239812 | -4.513999 | C  | 0.382227  | -4.811097 | -1.949051 |
| H | 3.512702 | 3.105326  | -4.622093 | H  | 0.244812  | -4.188888 | -2.837112 |
| H | 2.424898 | 1.182811  | -5.774203 | H  | -0.580085 | -5.261222 | -1.690058 |
| C | 1.935160 | 3.478082  | 0.023897  | H  | 1.081607  | -5.621117 | -2.204264 |
| C | 1.403131 | 4.745019  | 0.288637  | H  | 1.240626  | 0.244840  | -0.177446 |
| C | 3.257646 | 3.189372  | 0.406120  | C  | 1.232871  | 1.162783  | 1.736098  |
| C | 2.164494 | 5.717535  | 0.942634  | C  | 2.473042  | 0.605624  | 2.080438  |
| H | 0.387525 | 4.974429  | -0.010521 | C  | 0.427717  | 1.720167  | 2.737884  |
| C | 3.994773 | 4.160575  | 1.088476  | C  | 2.888881  | 0.605173  | 3.412813  |
| H | 3.721843 | 2.218560  | 0.183391  | H  | 3.141830  | 0.223029  | 1.310116  |
| C | 3.461259 | 5.424298  | 1.358525  | C  | 0.847631  | 1.714628  | 4.068568  |
| H | 1.732558 | 6.694532  | 1.140299  | H  | -0.540394 | 2.143864  | 2.489066  |
| H | 4.982407 | 3.905964  | 1.469900  | C  | 2.078859  | 1.152756  | 4.409458  |
| H | 4.044787 | 6.164861  | 1.899203  | H  | 3.847838  | 0.162797  | 3.665704  |
| C | 0.928707 | -3.999981 | -0.814089 | H  | 0.206267  | 2.136924  | 4.836816  |
| C | 2.217791 | -3.229786 | -0.869032 | H  | 2.401458  | 1.137495  | 5.447004  |
| C | 1.425741 | -4.591814 | 0.515643  | H  | -4.825394 | -1.005775 | 1.096586  |
| H | 1.647590 | -5.666329 | 0.481637  | C  | -4.728383 | -1.700049 | -0.903721 |
| H | 0.830358 | -4.353519 | 1.401163  | C  | -5.017714 | -2.996329 | -0.464412 |
| N | 2.624551 | -3.739506 | 0.354358  | C  | -4.444307 | -1.493365 | -2.260152 |
| O | 2.724856 | -2.446295 | -1.658547 | C  | -5.038600 | -4.064916 | -1.362775 |
| C | 3.658996 | -3.467166 | 1.263894  | H  | -5.209026 | -3.173340 | 0.590305  |
| C | 3.819350 | -4.307088 | 2.379164  | C  | -4.463839 | -2.557985 | -3.158962 |
| C | 4.497092 | -2.354851 | 1.093938  | H  | -4.208235 | -0.496588 | -2.620363 |
| C | 4.804078 | -4.027850 | 3.325390  | C  | -4.763985 | -3.847866 | -2.712940 |
| H | 3.168383 | -5.166180 | 2.510660  | H  | -5.261332 | -5.065489 | -1.003651 |
| C | 5.462951 | -2.077795 | 2.063417  | H  | -4.244980 | -2.381704 | -4.208381 |
| H | 4.408535 | -1.677834 | 0.251750  | H  | -4.778669 | -4.677390 | -3.414238 |
| C | 5.628273 | -2.908703 | 3.176973  | Br | -2.574528 | -1.635268 | 3.000893  |
| H | 4.912837 | -4.678337 | 4.188810  | Br | -0.627398 | -2.410116 | -0.337315 |
| H | 6.045549 | -1.166215 | 1.940010  | O  | 4.738254  | 0.532582  | -0.244477 |
| H | 6.372870 | -2.676549 | 3.934374  | P  | 6.156113  | 0.308879  | -0.893263 |

O 6.292097 -1.188948 -1.350344  
O 7.305421 0.655858 0.146387  
O 6.256751 1.268400 -2.137717  
K 8.258841 -1.693010 0.039522  
K 6.844385 3.105983 -0.540958  
K 4.126615 -0.472432 -2.744768

**<sup>2</sup>TS13-OA**

B3LYP/BSI SCF energy: -2712.491152a.u.

M06/BSII SCF energy in solution: -2711.268108a.u.

M06/BSII free energy in solution: -2710.473766a.u.

C 1.802573 -1.574588 -0.718865  
N 1.731955 -0.419652 -0.157183  
O 3.028775 -2.096796 -0.867965  
C 3.946968 -1.287966 -0.013571  
C 3.120127 0.044089 0.119020  
C -0.693860 -2.046027 -0.776198  
N -1.063873 -1.025439 -0.085893  
O -1.650509 -2.921361 -1.111545  
C -2.960260 -2.273770 -0.797295  
C -2.504515 -1.213441 0.262140  
Ni 0.073721 0.454058 0.652372  
C 0.685101 -2.434232 -1.282584  
C 0.696131 -2.293714 -2.833425  
H 1.656560 -2.635990 -3.226316  
H 0.536103 -1.257400 -3.139457  
H -0.100809 -2.906801 -3.258973  
C 0.945070 -3.915863 -0.894814  
H 0.166023 -4.547883 -1.321988  
H 0.949729 -4.045500 0.191331  
H 1.914922 -4.231734 -1.279259

C -3.921396 -3.334146 -0.285988  
C -5.242835 -2.954638 -0.009866  
C -3.542465 -4.665581 -0.090736  
C -6.160899 -3.886782 0.467540  
H -5.555817 -1.928379 -0.178627  
C -4.468166 -5.601363 0.378703  
H -2.526732 -4.974486 -0.308676  
C -5.776989 -5.215915 0.662942  
H -7.179223 -3.575516 0.680821  
H -4.160296 -6.633424 0.520769  
H -6.494830 -5.943751 1.029471  
C -3.447993 -1.675872 -2.125426  
C -3.633697 -0.305398 -2.347066  
C -3.690597 -2.570205 -3.183459  
C -4.045485 0.160817 -3.601834  
H -3.464067 0.432641 -1.570708  
C -4.098176 -2.105155 -4.429999  
H -3.564030 -3.636488 -3.021082  
C -4.276974 -0.734344 -4.643178  
H -4.159935 1.230952 -3.745955  
H -4.281781 -2.812353 -5.234129  
H -4.595433 -0.369646 -5.615496  
C 4.065014 -2.076126 1.300327  
C 3.311704 -1.771167 2.443916  
C 4.900869 -3.205133 1.329409  
C 3.405301 -2.569674 3.587825  
H 2.644927 -0.916124 2.477268  
C 4.988772 -4.001229 2.468716  
H 5.490342 -3.457512 0.454057  
C 4.241932 -3.683934 3.605886  
H 2.819086 -2.308099 4.463667  
H 5.645405 -4.866478 2.469797

H 4.315381 -4.299289 4.497896  
C 5.284658 -1.152911 -0.719275  
C 5.531288 -1.715538 -1.975144  
C 6.311645 -0.447421 -0.075481  
C 6.781774 -1.567178 -2.581662  
H 4.750118 -2.273591 -2.478076  
C 7.554740 -0.294802 -0.684631  
H 6.139706 -0.021901 0.909006  
C 7.794725 -0.855151 -1.941979  
H 6.959694 -2.012219 -3.556410  
H 8.337746 0.258849 -0.175105  
H 8.765214 -0.739387 -2.415254  
H 3.152530 0.407267 1.144564  
C 3.494589 1.206330 -0.784807  
C 3.864337 2.424424 -0.201665  
C 3.460885 1.109020 -2.183077  
C 4.198612 3.522769 -0.997273  
H 3.876532 2.516892 0.880840  
C 3.792676 2.204447 -2.978735  
H 3.182679 0.172682 -2.657119  
C 4.162373 3.415312 -2.387484  
H 4.480678 4.460985 -0.528607  
H 3.762396 2.113942 -4.060545  
H 4.417076 4.268892 -3.008609  
H -3.005996 -0.263427 0.108037  
C -2.638125 -1.567197 1.735015  
C -3.412645 -0.740242 2.557444  
C -1.983201 -2.668084 2.306173  
C -3.542300 -1.014567 3.920617  
H -3.893023 0.134738 2.130585  
C -2.111710 -2.942423 3.666310  
H -1.375724 -3.322623 1.688242

C -2.893675 -2.116103 4.477609  
H -4.141355 -0.359457 4.546089  
H -1.602300 -3.801488 4.093578  
H -2.990035 -2.328116 5.538487  
Br -2.470066 3.782782 -2.692018  
C -1.717487 2.449165 0.001907  
Br 0.884060 1.571262 2.591276  
C -0.273160 1.513193 -2.213938  
H 0.652157 0.954587 -2.043327  
H -1.077955 0.822988 -2.469981  
H -0.105383 2.171956 -3.069176  
C -0.634693 2.328554 -1.017649  
C -1.513807 4.527890 1.470505  
C -0.699626 5.648345 1.711571  
C -2.705886 4.355838 2.200706  
C -1.074421 6.582287 2.673826  
H 0.216784 5.781116 1.145931  
C -3.061991 5.300981 3.156747  
H -3.327120 3.492242 2.000385  
C -2.254454 6.415984 3.401742  
H -0.440027 7.445558 2.853062  
H -3.983529 5.166123 3.715951  
H -2.543163 7.147458 4.150351  
N -1.134648 3.602390 0.511366  
C -0.010477 3.603544 -0.445474  
H 0.966936 3.485051 0.032017  
H -0.022577 4.454009 -1.133027  
O -2.702638 1.809811 0.360897

**<sup>2</sup>[Ni<sup>II</sup>]H**

B3LYP/BSI SCF energy: -2169.192185a.u.

M06/BSII SCF energy in solution: -2168.244062a.u.

M06/BSII free energy in solution: -2167.606839a.u.

|   |           |           |           |    |           |           |           |
|---|-----------|-----------|-----------|----|-----------|-----------|-----------|
| C | 1.318891  | -0.208039 | -0.674260 | C  | -4.810064 | -3.505301 | 2.328775  |
| N | 1.410338  | -0.121256 | 0.599175  | H  | -5.512396 | -2.228520 | 3.918419  |
| O | 2.475244  | -0.298286 | -1.375069 | H  | -3.936823 | -4.521336 | 0.638683  |
| C | 3.537631  | -0.572809 | -0.372948 | H  | -5.313734 | -4.391101 | 2.704741  |
| C | 2.843578  | -0.043309 | 0.944850  | C  | 0.061504  | -0.282193 | -1.518967 |
| H | 3.031641  | -0.729241 | 1.770051  | C  | -0.036489 | -1.719501 | -2.110398 |
| C | 3.216131  | 1.352345  | 1.417081  | H  | 0.849160  | -1.929679 | -2.713996 |
| C | 3.976083  | 1.499376  | 2.583082  | H  | -0.098535 | -2.462016 | -1.310636 |
| C | 2.813697  | 2.503320  | 0.727568  | H  | -0.923939 | -1.801085 | -2.744051 |
| C | 4.340222  | 2.765273  | 3.044426  | C  | 0.166618  | 0.749584  | -2.669420 |
| H | 4.274043  | 0.615803  | 3.141272  | H  | -0.692213 | 0.657183  | -3.336177 |
| C | 3.174756  | 3.769430  | 1.185893  | H  | 0.191595  | 1.772814  | -2.283363 |
| H | 2.208593  | 2.412904  | -0.169152 | H  | 1.078525  | 0.568172  | -3.240597 |
| C | 3.941816  | 3.904567  | 2.345162  | Ni | -0.017090 | -0.763271 | 1.927183  |
| H | 4.925753  | 2.859453  | 3.954495  | H  | 0.674516  | -1.375923 | 3.179123  |
| H | 2.853518  | 4.651885  | 0.639598  | C  | -4.647945 | 0.124639  | -1.032483 |
| H | 4.219435  | 4.891524  | 2.704184  | C  | -5.860834 | 0.406139  | -0.388369 |
| C | -1.191547 | -0.028750 | -0.698590 | C  | -4.667226 | -0.673948 | -2.181201 |
| N | -1.374563 | -0.223133 | 0.554977  | C  | -7.060363 | -0.110347 | -0.873360 |
| O | -2.267928 | 0.368942  | -1.421639 | H  | -5.873824 | 1.037664  | 0.493687  |
| C | -3.341601 | 0.695293  | -0.480350 | C  | -5.871420 | -1.184468 | -2.671531 |
| C | -2.799930 | 0.032923  | 0.860848  | H  | -3.739944 | -0.891880 | -2.696828 |
| H | -2.827703 | 0.770133  | 1.663056  | C  | -7.071675 | -0.908287 | -2.019351 |
| C | -3.496776 | -1.220021 | 1.358834  | H  | -7.988503 | 0.115727  | -0.356494 |
| C | -4.267904 | -1.159180 | 2.524452  | H  | -5.865793 | -1.799437 | -3.567109 |
| C | -3.384370 | -2.444179 | 0.687104  | H  | -8.007616 | -1.306584 | -2.400004 |
| C | -4.923677 | -2.292640 | 3.007953  | C  | -3.417426 | 2.228911  | -0.396422 |
| H | -4.345631 | -0.220689 | 3.068165  | C  | -3.119751 | 2.993029  | -1.534464 |
| C | -4.036427 | -3.578013 | 1.167872  | C  | -3.843118 | 2.894513  | 0.760145  |
| H | -2.777981 | -2.514921 | -0.210383 | C  | -3.225536 | 4.382544  | -1.508925 |
|   |           |           |           | H  | -2.800852 | 2.493055  | -2.441973 |
|   |           |           |           | C  | -3.955759 | 4.286671  | 0.784040  |



|                                                    |           |           |           |    |           |           |           |
|----------------------------------------------------|-----------|-----------|-----------|----|-----------|-----------|-----------|
| H                                                  | -4.093471 | 2.339593  | 1.658819  |    |           |           |           |
| C                                                  | -3.643445 | 5.036765  | -0.348322 | C  | -1.460664 | -0.522886 | -1.126026 |
| H                                                  | -2.983305 | 4.954914  | -2.399938 | N  | -1.412601 | 0.403690  | -0.240669 |
| H                                                  | -4.282536 | 4.780574  | 1.694421  | O  | -2.671885 | -1.070407 | -1.391620 |
| H                                                  | -3.725068 | 6.119484  | -0.327921 | C  | -3.669390 | -0.198778 | -0.730142 |
| C                                                  | 4.799086  | 0.171020  | -0.774163 | C  | -2.760083 | 0.526310  | 0.346644  |
| C                                                  | 5.974918  | -0.046945 | -0.040856 | C  | 0.969776  | -0.949227 | -1.144227 |
| C                                                  | 4.824891  | 1.077347  | -1.838439 | N  | 1.346972  | 0.047062  | -0.431944 |
| C                                                  | 7.147064  | 0.634691  | -0.360130 | O  | 1.792931  | -2.029273 | -1.183070 |
| H                                                  | 5.973230  | -0.759638 | 0.778695  | C  | 2.782164  | -1.845620 | -0.116327 |
| C                                                  | 6.003075  | 1.755231  | -2.162184 | C  | 2.666668  | -0.276229 | 0.142112  |
| H                                                  | 3.923927  | 1.248684  | -2.415322 | Ni | 0.206909  | 1.655086  | 0.083978  |
| C                                                  | 7.166007  | 1.539351  | -1.424580 | C  | -0.299784 | -1.016301 | -1.977402 |
| H                                                  | 8.047363  | 0.455997  | 0.220670  | C  | -0.564014 | -2.450403 | -2.477247 |
| H                                                  | 6.007489  | 2.452881  | -2.994993 | H  | -1.474726 | -2.468825 | -3.077634 |
| H                                                  | 8.080912  | 2.067633  | -1.676716 | H  | -0.683228 | -3.151354 | -1.647179 |
| C                                                  | 3.723014  | -2.098278 | -0.388361 | H  | 0.272221  | -2.790329 | -3.091322 |
| C                                                  | 4.502021  | -2.674718 | -1.405192 | C  | -0.158392 | -0.047530 | -3.187336 |
| C                                                  | 3.066500  | -2.948161 | 0.515471  | H  | 0.645480  | -0.391742 | -3.845817 |
| C                                                  | 4.636005  | -4.057570 | -1.509204 | H  | 0.068799  | 0.963852  | -2.840052 |
| H                                                  | 5.010730  | -2.032699 | -2.116858 | H  | -1.090683 | -0.029813 | -3.758930 |
| C                                                  | 3.205912  | -4.335109 | 0.410646  | C  | 4.130845  | -2.340905 | -0.632739 |
| H                                                  | 2.429800  | -2.556366 | 1.303606  | C  | 5.160948  | -2.662026 | 0.261363  |
| C                                                  | 3.990292  | -4.894809 | -0.596514 | C  | 4.374114  | -2.459394 | -2.006909 |
| H                                                  | 5.248482  | -4.480209 | -2.300773 | C  | 6.405521  | -3.082052 | -0.207028 |
| H                                                  | 2.693517  | -4.972812 | 1.125163  | H  | 4.990387  | -2.598242 | 1.330725  |
| H                                                  | 4.098611  | -5.973207 | -0.671390 | C  | 5.616540  | -2.889212 | -2.474416 |
|                                                    |           |           |           | H  | 3.585076  | -2.223866 | -2.710632 |
|                                                    |           |           |           | C  | 6.638688  | -3.199833 | -1.577710 |
| <b><sup>2</sup>TS14</b>                            |           |           |           | H  | 7.190436  | -3.325353 | 0.503380  |
| B3LYP/BSI SCF energy: -2405.032621a.u.             |           |           |           | H  | 5.782963  | -2.980366 | -3.544094 |
| M06/BSII SCF energy in solution: -2403.947505a.u.  |           |           |           | H  | 7.605693  | -3.533812 | -1.942478 |
| M06/BSII free energy in solution: -2403.155597a.u. |           |           |           |    |           |           |           |

|   |           |           |           |   |           |           |           |
|---|-----------|-----------|-----------|---|-----------|-----------|-----------|
| C | 2.296811  | -2.676087 | 1.083871  | H | -7.634245 | -3.198386 | 1.415706  |
| C | 2.562195  | -2.311403 | 2.409962  | C | 0.946364  | 3.405935  | -0.682896 |
| C | 1.611047  | -3.877581 | 0.848162  | H | 0.477698  | 3.689299  | -1.623415 |
| C | 2.142631  | -3.116347 | 3.472279  | H | 2.034165  | 3.445647  | -0.682968 |
| H | 3.099167  | -1.395796 | 2.635864  | C | 0.252393  | 3.675980  | 0.548657  |
| C | 1.185375  | -4.677464 | 1.907410  | H | -0.319045 | 2.412353  | 1.359921  |
| H | 1.410797  | -4.181561 | -0.173066 | H | -0.732334 | 4.137098  | 0.439572  |
| C | 1.448402  | -4.299735 | 3.226191  | C | 1.022289  | 4.251300  | 1.735883  |
| H | 2.356192  | -2.808949 | 4.491779  | H | 1.954702  | 3.686278  | 1.864128  |
| H | 0.651541  | -5.600922 | 1.701196  | H | 0.446621  | 4.114158  | 2.660698  |
| H | 1.119582  | -4.924134 | 4.051843  | C | 1.350671  | 5.741932  | 1.550435  |
| C | -4.174332 | 0.743228  | -1.834559 | H | 1.939590  | 5.870306  | 0.633602  |
| C | -3.618987 | 2.012289  | -2.057138 | H | 0.416239  | 6.301447  | 1.393131  |
| C | -5.158506 | 0.282678  | -2.724598 | C | 2.107167  | 6.350511  | 2.738049  |
| C | -4.051535 | 2.802861  | -3.125188 | H | 3.036943  | 5.787612  | 2.900374  |
| H | -2.835488 | 2.398616  | -1.414703 | H | 1.512722  | 6.221625  | 3.653185  |
| C | -5.587813 | 1.070278  | -3.790758 | C | 2.437439  | 7.834919  | 2.549463  |
| H | -5.593378 | -0.700209 | -2.576908 | H | 3.060354  | 7.991254  | 1.661113  |
| C | -5.038219 | 2.338084  | -3.993010 | H | 2.978790  | 8.240894  | 3.411040  |
| H | -3.610212 | 3.784143  | -3.273866 | H | 1.525889  | 8.429997  | 2.419443  |
| H | -6.354246 | 0.693585  | -4.462188 | C | 3.777522  | 0.591103  | -0.423845 |
| H | -5.375672 | 2.956011  | -4.820199 | C | 3.773369  | 1.033437  | -1.751680 |
| C | -4.774711 | -1.065423 | -0.152085 | C | 4.847317  | 0.953882  | 0.403172  |
| C | -4.673983 | -2.459182 | -0.100752 | C | 4.821381  | 1.811739  | -2.242786 |
| C | -5.923167 | -0.449784 | 0.367114  | H | 2.934488  | 0.792294  | -2.395577 |
| C | -5.701192 | -3.222559 | 0.459549  | C | 5.898690  | 1.730107  | -0.085686 |
| H | -3.794274 | -2.944966 | -0.505552 | H | 4.857173  | 0.630850  | 1.441556  |
| C | -6.943709 | -1.211547 | 0.932064  | C | 5.889090  | 2.159996  | -1.413012 |
| H | -6.022568 | 0.630746  | 0.319636  | H | 4.799374  | 2.154086  | -3.273561 |
| C | -6.836958 | -2.603563 | 0.979542  | H | 6.718473  | 2.004487  | 0.572106  |
| H | -5.609362 | -4.304712 | 0.487048  | H | 6.702386  | 2.769784  | -1.795878 |
| H | -7.824683 | -0.717501 | 1.331649  | C | -2.800098 | -0.031503 | 1.760695  |



|   |           |           |           |   |           |           |           |
|---|-----------|-----------|-----------|---|-----------|-----------|-----------|
| H | -4.471537 | 2.084998  | -0.610517 | C | 2.271123  | -2.659393 | 4.583286  |
| C | -4.527554 | 1.750723  | -4.465027 | H | 0.376941  | -3.687474 | 4.483379  |
| H | -3.970061 | -0.302049 | -4.158551 | H | 4.000501  | -1.371647 | 4.532735  |
| C | -4.836764 | 2.972300  | -3.862172 | H | 2.764400  | -3.441951 | 5.152635  |
| H | -5.055019 | 4.017318  | -1.990148 | C | -1.161287 | 3.687495  | 2.743768  |
| H | -4.550014 | 1.655435  | -5.546765 | H | -1.923128 | 3.835752  | 3.513047  |
| H | -5.094923 | 3.833877  | -4.470429 | H | -1.639371 | 3.779919  | 1.756039  |
| C | -5.040901 | -1.437546 | -1.373382 | H | -0.425620 | 4.488712  | 2.841221  |
| C | -4.918635 | -2.823441 | -1.531773 | H | -3.218808 | 0.815835  | 0.173283  |
| C | -6.305091 | -0.899332 | -1.097904 | C | -3.448162 | -1.100755 | 1.070740  |
| C | -6.036060 | -3.651484 | -1.417648 | C | -4.413804 | -0.638289 | 1.974389  |
| H | -3.950696 | -3.256000 | -1.754606 | C | -2.885141 | -2.366071 | 1.274451  |
| C | -7.418751 | -1.729114 | -0.972893 | C | -4.813809 | -1.422879 | 3.055764  |
| H | -6.426508 | 0.173751  | -0.993377 | H | -4.852856 | 0.346758  | 1.836132  |
| C | -7.289489 | -3.109147 | -1.134844 | C | -3.284849 | -3.153764 | 2.355610  |
| H | -5.923114 | -4.723515 | -1.551206 | H | -2.118755 | -2.733548 | 0.599708  |
| H | -8.389854 | -1.292782 | -0.758315 | C | -4.249983 | -2.685120 | 3.248510  |
| H | -8.158276 | -3.754593 | -1.045893 | H | -5.557088 | -1.044545 | 3.750963  |
| C | -0.498406 | 2.365496  | 2.896618  | H | -2.836340 | -4.132110 | 2.502103  |
| C | 0.784614  | 1.866100  | 2.480040  | H | -4.554870 | -3.295525 | 4.093173  |
| C | -1.037371 | 0.954590  | 3.040410  | H | 2.838300  | -0.843722 | 0.607585  |
| H | -1.892479 | 0.664726  | 2.422986  | C | 3.446458  | 0.571408  | -0.859773 |
| H | -1.203240 | 0.639210  | 4.073061  | C | 4.237255  | 1.226068  | 0.089512  |
| N | 0.287414  | 0.448176  | 2.500695  | C | 3.374735  | 1.094926  | -2.158624 |
| O | 1.894314  | 2.257957  | 2.153210  | C | 4.954363  | 2.374316  | -0.250768 |
| C | 0.979540  | -0.605364 | 3.172444  | H | 4.275415  | 0.852041  | 1.107464  |
| C | 0.287922  | -1.779010 | 3.504023  | C | 4.092744  | 2.238465  | -2.501841 |
| C | 2.330331  | -0.471033 | 3.530876  | H | 2.762402  | 0.607207  | -2.910570 |
| C | 0.931004  | -2.792902 | 4.212285  | C | 4.887116  | 2.880560  | -1.547835 |
| H | -0.756504 | -1.881803 | 3.227722  | H | 5.551884  | 2.876912  | 0.503434  |
| C | 2.963959  | -1.497969 | 4.232493  | H | 4.031323  | 2.630232  | -3.513038 |
| H | 2.848839  | 0.452416  | 3.303559  | H | 5.442577  | 3.774961  | -1.814450 |

|                                                    |           |           |           |    |          |           |           |
|----------------------------------------------------|-----------|-----------|-----------|----|----------|-----------|-----------|
| Br                                                 | 0.225529  | 2.661804  | 5.551631  | N  | 2.054256 | 0.246163  | -0.593789 |
| C                                                  | -0.432492 | 2.406554  | -0.794796 | O  | 4.151817 | -0.554679 | -0.451685 |
| H                                                  | -0.621940 | 2.095824  | -1.833422 | C  | 4.244354 | 0.750880  | 0.240124  |
| H                                                  | -1.399081 | 2.783045  | -0.417150 | C  | 2.852634 | 1.410103  | -0.151961 |
| C                                                  | 0.610307  | 3.527587  | -0.762774 | Ni | 0.059060 | 0.245394  | -0.887089 |
| H                                                  | 1.567866  | 3.153415  | -1.146568 | C  | 2.478325 | -2.128627 | -1.276198 |
| H                                                  | 0.811128  | 3.829416  | 0.271842  | C  | 3.531710 | -3.176182 | -0.852940 |
| C                                                  | 0.210774  | 4.773558  | -1.575273 | H  | 3.248189 | -4.156929 | -1.237685 |
| H                                                  | -0.744506 | 5.163610  | -1.193633 | H  | 3.621205 | -3.238317 | 0.234847  |
| H                                                  | 0.021382  | 4.481520  | -2.619514 | H  | 4.509100 | -2.906004 | -1.256084 |
| C                                                  | 1.262908  | 5.889934  | -1.542557 | C  | 2.395935 | -2.057864 | -2.829235 |
| H                                                  | 1.447858  | 6.181322  | -0.498910 | H  | 3.375831 | -1.798132 | -3.241421 |
| H                                                  | 2.218892  | 5.496753  | -1.917738 | H  | 1.665079 | -1.307710 | -3.141319 |
| C                                                  | 0.873112  | 7.132959  | -2.352376 | H  | 2.097901 | -3.031416 | -3.227408 |
| H                                                  | -0.081570 | 7.525160  | -1.975230 | C  | 5.468462 | 1.490572  | -0.272227 |
| H                                                  | 0.688564  | 6.842740  | -3.396367 | C  | 5.764166 | 2.759428  | 0.248414  |
| C                                                  | 1.930220  | 8.241546  | -2.310577 | C  | 6.314831 | 0.945166  | -1.242219 |
| H                                                  | 2.111192  | 8.576469  | -1.282838 | C  | 6.874828 | 3.469994  | -0.200176 |
| H                                                  | 1.622456  | 9.115093  | -2.895520 | H  | 5.123681 | 3.191245  | 1.011727  |
| H                                                  | 2.887424  | 7.891474  | -2.714469 | C  | 7.430933 | 1.657774  | -1.689519 |
| <b><sup>2</sup>IM8-S</b>                           |           |           |           | H  | 6.102043 | -0.038051 | -1.644782 |
| B3LYP/BSI SCF energy: -2935.517334a.u.             |           |           |           | C  | 7.713969 | 2.921010  | -1.173324 |
| M06/BSII SCF energy in solution: -2934.180346 a.u. |           |           |           | H  | 7.085715 | 4.452934  | 0.210964  |
| M06/BSII free energy in solution: -2933.219554a.u. |           |           |           | H  | 8.079048 | 1.218802  | -2.442783 |
| C                                                  | 1.109019  | -2.528931 | -0.752310 | H  | 8.581029 | 3.474089  | -1.522428 |
| N                                                  | 0.179612  | -1.743178 | -0.353244 | C  | 4.335387 | 0.407135  | 1.736285  |
| O                                                  | 0.835519  | -3.854858 | -0.773435 | C  | 3.182897 | 0.115617  | 2.485368  |
| C                                                  | -0.628120 | -3.976567 | -0.542938 | C  | 5.584852 | 0.269227  | 2.358550  |
| C                                                  | -0.940303 | -2.582775 | 0.127731  | C  | 3.281699 | -0.291111 | 3.816907  |
| C                                                  | 2.847820  | -0.751043 | -0.746452 | H  | 2.196512 | 0.188399  | 2.040310  |
|                                                    |           |           |           | C  | 5.682120 | -0.129105 | 3.692063  |
|                                                    |           |           |           | H  | 6.489459 | 0.476166  | 1.798071  |

|   |           |           |           |   |           |           |           |
|---|-----------|-----------|-----------|---|-----------|-----------|-----------|
| C | 4.530452  | -0.409775 | 4.427813  | H | -1.715634 | 1.217261  | 3.641652  |
| H | 2.375119  | -0.522446 | 4.368618  | C | 0.261042  | 4.405201  | 2.638465  |
| H | 6.661336  | -0.221616 | 4.153186  | H | -1.477415 | 4.934327  | 1.480494  |
| H | 4.605481  | -0.720546 | 5.466006  | C | 0.847260  | 3.469605  | 3.492921  |
| C | -1.253889 | -4.121784 | -1.940535 | H | 0.576144  | 1.590891  | 4.515489  |
| C | -1.653643 | -3.007908 | -2.697146 | H | 0.801693  | 5.305515  | 2.359698  |
| C | -1.348835 | -5.394216 | -2.525599 | H | 1.848158  | 3.631461  | 3.881318  |
| C | -2.147242 | -3.170412 | -3.993767 | C | -5.350541 | 1.771593  | -0.038084 |
| H | -1.576259 | -2.000977 | -2.299641 | H | -5.959795 | 0.915314  | 0.260276  |
| C | -1.839877 | -5.553678 | -3.820476 | H | -4.453588 | 1.406574  | -0.553409 |
| H | -1.040785 | -6.267581 | -1.961050 | H | -5.922546 | 2.389889  | -0.734508 |
| C | -2.245240 | -4.441048 | -4.559579 | H | -1.873045 | -2.180947 | -0.268481 |
| H | -2.454203 | -2.294032 | -4.557118 | C | -1.012851 | -2.514494 | 1.645726  |
| H | -1.908960 | -6.549533 | -4.249082 | C | -2.133172 | -1.939187 | 2.253796  |
| H | -2.634014 | -4.564002 | -5.566450 | C | 0.042047  | -2.956413 | 2.458197  |
| C | -0.890638 | -5.189243 | 0.332335  | C | -2.211336 | -1.815205 | 3.643629  |
| C | 0.131056  | -6.055087 | 0.734151  | H | -2.947966 | -1.560944 | 1.643126  |
| C | -2.207211 | -5.460348 | 0.733005  | C | -0.035289 | -2.842814 | 3.844946  |
| C | -0.156916 | -7.166232 | 1.531752  | H | 0.924039  | -3.401335 | 2.008399  |
| H | 1.150532  | -5.859482 | 0.423140  | C | -1.163666 | -2.272129 | 4.442421  |
| C | -2.492178 | -6.565881 | 1.530778  | H | -3.083528 | -1.343354 | 4.083629  |
| H | -3.013159 | -4.804263 | 0.416927  | H | 0.784953  | -3.202957 | 4.460068  |
| C | -1.466083 | -7.424386 | 1.934297  | H | -1.221765 | -2.183061 | 5.523771  |
| H | 0.647894  | -7.829743 | 1.835613  | H | 2.391001  | 1.825149  | 0.746184  |
| H | -3.516363 | -6.757133 | 1.837394  | C | 2.853903  | 2.499140  | -1.209965 |
| H | -1.688295 | -8.287302 | 2.555277  | C | 2.481305  | 3.800623  | -0.856361 |
| C | -4.927721 | 2.564548  | 1.175687  | C | 3.197001  | 2.233721  | -2.542254 |
| N | -3.039716 | 2.864092  | 2.021804  | C | 2.463651  | 4.821638  | -1.808789 |
| C | -1.740772 | 3.052004  | 2.509086  | H | 2.186663  | 4.011647  | 0.168560  |
| C | -1.158786 | 2.105311  | 3.369515  | C | 3.179292  | 3.250313  | -3.495118 |
| C | -1.027087 | 4.202522  | 2.143551  | H | 3.477118  | 1.227571  | -2.837895 |
| C | 0.129109  | 2.324397  | 3.851096  | C | 2.814650  | 4.549019  | -3.130692 |

H 2.167932 5.825851 -1.518451  
H 3.447724 3.028974 -4.524141  
H 2.798346 5.339975 -3.874961  
Br -6.574258 3.307839 2.123950  
C -1.657377 1.011313 -1.554923  
H -2.503391 0.386098 -1.215596  
H -1.809756 1.990827 -1.065178  
C -1.767448 1.207102 -3.080029  
H -1.611069 0.245958 -3.595305  
H -0.950178 1.855087 -3.429816  
C -3.098578 1.802260 -3.575981  
H -3.262624 2.771236 -3.079900  
H -3.925692 1.152632 -3.250763  
C -3.177448 1.995516 -5.096322  
H -2.352583 2.646368 -5.421926  
H -3.009816 1.028415 -5.594015  
C -4.506797 2.586102 -5.583779  
H -4.674641 3.553587 -5.090364  
H -5.331585 1.936008 -5.260253  
C -4.571405 2.772292 -7.103434  
H -3.778264 3.442961 -7.454122  
H -5.530105 3.199049 -7.417701  
H -4.446714 1.816250 -7.625296  
C -3.811477 3.633591 1.029379  
H -3.341445 3.650091 0.040114  
H -4.075231 4.642940 1.353088  
C -3.991246 1.875605 2.189221  
O -4.026267 0.859042 2.846236

**<sup>2</sup>TS15-R**

B3LYP/BSI SCF energy: -2935.507587a.u.

M06/BSII SCF energy in solution: -2934.176323a.u.

M06/BSII free energy in solution: -2933.216597a.u.

C -1.602636 -0.507039 -1.773534  
N -1.648281 -0.225500 -0.522543  
O -2.780499 -0.592077 -2.423736  
C -3.818992 -0.041712 -1.533406  
C -3.077348 -0.148792 -0.136305  
C 0.908784 -0.831522 -1.924606  
N 1.219848 -0.332576 -0.785163  
O 1.895385 -1.442132 -2.608475  
C 3.008700 -1.649302 -1.657156  
C 2.685099 -0.534350 -0.589716  
Ni -0.031951 0.690125 0.503915  
C -0.409134 -0.768417 -2.673986  
C -0.648948 -2.111446 -3.416055  
H -1.591352 -2.065962 -3.963047  
H -0.685415 -2.951339 -2.716300  
H 0.162936 -2.292698 -4.120531  
C -0.305479 0.387089 -3.713508  
H 0.519917 0.184284 -4.400339  
H -0.130163 1.345410 -3.219756  
H -1.232148 0.451327 -4.286750  
C 4.329475 -1.498861 -2.400273  
C 5.525358 -1.662959 -1.687554  
C 4.387399 -1.242038 -3.773415  
C 6.754271 -1.553666 -2.333403  
H 5.496675 -1.884167 -0.624729  
C 5.621386 -1.141242 -4.421177  
H 3.469975 -1.120976 -4.337646  
C 6.807309 -1.292878 -3.705004  
H 7.671535 -1.676782 -1.765284  
H 5.650473 -0.942846 -5.488821

|   |           |           |           |   |           |           |           |
|---|-----------|-----------|-----------|---|-----------|-----------|-----------|
| H | 7.765752  | -1.212230 | -4.209142 | H | -8.424320 | -0.754030 | -1.071757 |
| C | 2.861801  | -3.097112 | -1.158442 | H | -8.301017 | -3.059585 | -2.002628 |
| C | 2.962472  | -3.478379 | 0.182321  | C | -0.584534 | 1.494241  | 3.107352  |
| C | 2.669247  | -4.095771 | -2.129707 | C | 0.749382  | 1.045877  | 2.772308  |
| C | 2.866201  | -4.827127 | 0.543984  | C | -1.092125 | 0.060729  | 3.112245  |
| H | 3.108857  | -2.751701 | 0.973249  | H | -1.914468 | -0.206307 | 2.445774  |
| C | 2.566351  | -5.435127 | -1.767935 | H | -1.274528 | -0.335152 | 4.114664  |
| H | 2.607535  | -3.816165 | -3.176319 | N | 0.263724  | -0.343000 | 2.586459  |
| C | 2.666204  | -5.806939 | -0.424083 | O | 1.875804  | 1.479215  | 2.576092  |
| H | 2.936809  | -5.093069 | 1.593153  | C | 0.934374  | -1.506115 | 3.048577  |
| H | 2.417111  | -6.189765 | -2.535035 | C | 0.221386  | -2.708777 | 3.162600  |
| H | 2.591029  | -6.852096 | -0.138128 | C | 2.289634  | -1.463542 | 3.415888  |
| C | -4.071066 | 1.401828  | -1.993138 | C | 0.850360  | -3.848340 | 3.660573  |
| C | -4.330362 | 2.454048  | -1.107910 | H | -0.826312 | -2.740736 | 2.880846  |
| C | -4.115024 | 1.661310  | -3.372316 | C | 2.906749  | -2.614347 | 3.907160  |
| C | -4.606011 | 3.738402  | -1.586794 | H | 2.823398  | -0.522636 | 3.363262  |
| H | -4.327555 | 2.295489  | -0.034742 | C | 2.195110  | -3.809812 | 4.037161  |
| C | -4.382991 | 2.941885  | -3.849669 | H | 0.281905  | -4.768639 | 3.763193  |
| H | -3.940898 | 0.850387  | -4.071681 | H | 3.946867  | -2.564619 | 4.217291  |
| C | -4.627529 | 3.988303  | -2.956880 | H | 2.677592  | -4.694504 | 4.442521  |
| H | -4.797103 | 4.541041  | -0.881030 | C | -1.236179 | 2.818785  | 3.271429  |
| H | -4.406341 | 3.121980  | -4.920534 | H | -1.932537 | 2.802175  | 4.113653  |
| H | -4.835566 | 4.987468  | -3.327468 | H | -1.788524 | 3.114001  | 2.367709  |
| C | -5.075205 | -0.894859 | -1.687958 | H | -0.483157 | 3.582401  | 3.476582  |
| C | -5.013540 | -2.193349 | -2.207954 | H | -3.221646 | 0.772366  | 0.427165  |
| C | -6.318049 | -0.387251 | -1.285683 | C | -3.493999 | -1.316103 | 0.745152  |
| C | -6.170196 | -2.965689 | -2.323695 | C | -4.504339 | -1.122697 | 1.696902  |
| H | -4.062587 | -2.599217 | -2.531486 | C | -2.913585 | -2.584078 | 0.626415  |
| C | -7.470715 | -1.164816 | -1.390136 | C | -4.931351 | -2.173187 | 2.508175  |
| H | -6.391135 | 0.624758  | -0.901119 | H | -4.957051 | -0.140729 | 1.809698  |
| C | -7.402084 | -2.456969 | -1.912685 | C | -3.339267 | -3.637344 | 1.438252  |
| H | -6.104680 | -3.968190 | -2.736663 | H | -2.111908 | -2.748399 | -0.085959 |



C -4.349194 -3.435699 2.380197  
H -5.710203 -2.002802 3.245272  
H -2.875456 -4.614270 1.336917  
H -4.674836 -4.253579 3.015852  
H 2.838632 -0.907504 0.421376  
C 3.439484 0.777868 -0.732803  
C 4.199618 1.252781 0.340433  
C 3.391256 1.531438 -1.914690  
C 4.912197 2.448596 0.233316  
H 4.211378 0.703737 1.275862  
C 4.104506 2.722982 -2.025212  
H 2.803915 1.184518 -2.758851  
C 4.870650 3.183637 -0.950662  
H 5.486768 2.808037 1.081396  
H 4.062681 3.292634 -2.949082  
H 5.424751 4.113884 -1.035798  
Br 0.194484 1.318023 5.886674  
C -0.357434 2.535594 -0.184541  
H -0.471239 2.439911 -1.274995  
H -1.338391 2.857997 0.197507  
C 0.711299 3.581508 0.139382  
H 1.686884 3.242591 -0.230711  
H 0.830789 3.680071 1.224652  
C 0.418730 4.971167 -0.458253  
H -0.551872 5.330019 -0.084915  
H 0.307163 4.879790 -1.549347  
C 1.501133 6.012391 -0.144760  
H 1.606581 6.108459 0.945182  
H 2.471143 5.644301 -0.508783  
C 1.224248 7.394824 -0.749321  
H 0.257135 7.764031 -0.380640  
H 1.114650 7.298545 -1.838785

C 2.314858 8.424529 -0.435784  
H 2.424045 8.568344 0.645192  
H 2.088348 9.400025 -0.879681  
H 3.288010 8.100958 -0.823305

## <sup>2</sup>TS15-S

B3LYP/BSI SCF energy: -2935.508392a.u.

M06/BSII SCF energy in solution: -2934.18253a.u.

M06/BSII free energy in solution: -2933.220028a.u.

C -1.373855 -0.055530 -1.861816  
N -1.464059 -0.007027 -0.582492  
O -2.528943 -0.042821 -2.554832  
C -3.597451 0.306275 -1.587716  
C -2.906314 -0.132007 -0.242954  
C 1.086774 -0.545695 -1.889035  
N 1.354350 -0.194531 -0.681747  
O 1.988240 -1.315917 -2.515235  
C 2.943601 -1.806932 -1.490356  
C 2.668266 -0.780992 -0.310376  
Ni 0.068293 0.896067 0.560260  
C -0.127390 -0.173296 -2.727902  
C -0.385574 -1.275350 -3.790060  
H -1.249876 -1.001192 -4.395640  
H -0.574284 -2.246685 -3.325373  
H 0.486027 -1.375344 -4.437292  
C 0.158048 1.169485 -3.458095  
H 0.984676 1.030349 -4.160614  
H 0.418969 1.960128 -2.754545  
H -0.727423 1.476252 -4.019671  
C 4.349701 -1.752876 -2.065580  
C 5.411539 -2.257476 -1.300494

|   |           |           |           |   |           |           |           |
|---|-----------|-----------|-----------|---|-----------|-----------|-----------|
| C | 4.619041  | -1.222521 | -3.330617 | C | -4.852536 | -1.466841 | -2.935907 |
| C | 6.716259  | -2.218059 | -1.786091 | C | -6.067085 | -0.140267 | -1.328739 |
| H | 5.215090  | -2.690771 | -0.324228 | C | -6.028259 | -2.150020 | -3.254168 |
| C | 5.927936  | -1.190230 | -3.819677 | H | -3.929080 | -1.718593 | -3.443079 |
| H | 3.806362  | -0.840572 | -3.937275 | C | -7.236725 | -0.830722 | -1.639671 |
| C | 6.979841  | -1.683327 | -3.049761 | H | -6.096836 | 0.656036  | -0.591545 |
| H | 7.527095  | -2.609468 | -1.178909 | C | -7.222684 | -1.838161 | -2.606540 |
| H | 6.120248  | -0.779311 | -4.806609 | H | -6.005558 | -2.928885 | -4.011093 |
| H | 7.996559  | -1.656530 | -3.430327 | H | -8.161207 | -0.575058 | -1.130338 |
| C | 2.489895  | -3.244282 | -1.194217 | H | -8.135784 | -2.371453 | -2.854067 |
| C | 1.570062  | -3.551038 | -0.181253 | C | -0.175190 | 1.823621  | 2.965479  |
| C | 2.920899  | -4.279536 | -2.041046 | C | -0.987120 | 0.639220  | 2.780064  |
| C | 1.110119  | -4.859431 | -0.009577 | N | 0.245327  | -0.174166 | 2.565476  |
| H | 1.191398  | -2.791115 | 0.492376  | C | 0.450634  | -1.512197 | 2.979294  |
| C | 2.459992  | -5.582973 | -1.870505 | C | -0.609571 | -2.431922 | 2.941854  |
| H | 3.624457  | -4.062818 | -2.837260 | C | 1.717654  | -1.928753 | 3.416482  |
| C | 1.553947  | -5.878854 | -0.849771 | C | -0.392470 | -3.746310 | 3.351005  |
| H | 0.409871  | -5.066475 | 0.792656  | H | -1.591028 | -2.101508 | 2.627725  |
| H | 2.812047  | -6.367480 | -2.534174 | C | 1.920788  | -3.250859 | 3.812245  |
| H | 1.199724  | -6.896239 | -0.710513 | H | 2.530268  | -1.212411 | 3.481578  |
| C | -3.821629 | 1.821010  | -1.707154 | C | 0.869041  | -4.167126 | 3.782449  |
| C | -4.053444 | 2.647969  | -0.602027 | H | -1.226007 | -4.442764 | 3.339130  |
| C | -3.867195 | 2.387060  | -2.991545 | H | 2.902691  | -3.557454 | 4.161324  |
| C | -4.311874 | 4.011170  | -0.776401 | H | 1.026596  | -5.192419 | 4.103205  |
| H | -4.038322 | 2.251086  | 0.407212  | C | -0.477188 | 3.250437  | 3.233001  |
| C | -4.116175 | 3.746389  | -3.163692 | H | -1.559049 | 3.398988  | 3.272304  |
| H | -3.710906 | 1.752937  | -3.858286 | H | -0.058498 | 3.906437  | 2.460382  |
| C | -4.339700 | 4.565601  | -2.053998 | H | -0.063799 | 3.548863  | 4.199934  |
| H | -4.486259 | 4.635360  | 0.094872  | H | -3.129541 | 0.552291  | 0.570756  |
| H | -4.143971 | 4.165339  | -4.165571 | C | -3.238953 | -1.540356 | 0.232622  |
| H | -4.537227 | 5.625169  | -2.186626 | C | -4.110277 | -1.701176 | 1.317314  |
| C | -4.860393 | -0.455870 | -1.968975 | C | -2.722775 | -2.683625 | -0.389669 |

C -4.469184 -2.974348 1.760461  
H -4.483503 -0.825906 1.838302  
C -3.077752 -3.958347 0.052982  
H -2.029177 -2.590459 -1.219125  
C -3.955658 -4.108027 1.127872  
H -5.138613 -3.077765 2.609206  
H -2.664023 -4.832760 -0.441344  
H -4.232103 -5.099795 1.474320  
H 2.543778 -1.334691 0.621487  
C 3.718046 0.289200 -0.069590  
C 4.472760 0.255110 1.109427  
C 3.963058 1.309986 -0.997284  
C 5.453334 1.217546 1.359424  
H 4.293723 -0.532971 1.836432  
C 4.942667 2.270774 -0.751798  
H 3.388003 1.356855 -1.916761  
C 5.689720 2.228355 0.427891  
H 6.025580 1.178007 2.281482  
H 5.120936 3.056167 -1.480315  
H 6.448800 2.980825 0.619657  
Br -0.550341 1.094591 5.908702  
C -0.128941 2.779745 -0.099243  
H -0.547238 2.706308 -1.110639  
H -0.906361 3.254547 0.510597  
C 1.136370 3.640540 -0.114174  
H 1.904251 3.174415 -0.745722  
H 1.580204 3.691452 0.890895  
C 0.905284 5.081037 -0.612396  
H 0.149276 5.563770 0.022829  
H 0.471775 5.046796 -1.622771  
C 2.177822 5.937811 -0.631893  
H 2.603564 5.977692 0.381090

H 2.937609 5.447226 -1.258459  
C 1.953114 7.367632 -1.140829  
H 1.194667 7.857821 -0.515507  
H 1.530055 7.328605 -2.154255  
C 3.229845 8.214618 -1.152531  
H 3.654729 8.304138 -0.146233  
H 3.037313 9.227116 -1.522685  
H 3.997143 7.766656 -1.794901  
C 1.094132 0.983770 3.027194  
H 1.922544 1.227744 2.349333  
H 1.462641 0.847930 4.048485  
O -2.155995 0.313855 2.687824

#### <sup>4</sup>IM9 /B

B3LYP/BSI SCF energy: -2418.533127a.u.

M06/BSII SCF energy in solution: -2417.419289a.u.

M06/BSII free energy in solution: -2416.616414a.u.

C -1.540831 -0.163308 -1.172728  
N -1.462674 0.415160 -0.032930  
O -2.761165 -0.372212 -1.693571  
C -3.710569 0.411843 -0.854450  
C -2.852139 0.616250 0.455029  
C 0.781839 -0.979942 -1.128746  
N 1.244242 -0.314197 -0.124766  
O 1.392572 -2.139225 -1.427023  
C 2.263383 -2.463094 -0.269951  
C 2.482786 -1.018209 0.313518  
Ni 0.307823 1.185520 0.764609  
C -0.368673 -0.583391 -2.038429  
C -0.768470 -1.748528 -2.966775  
H -1.597906 -1.437868 -3.603335

|   |           |           |           |   |           |           |           |
|---|-----------|-----------|-----------|---|-----------|-----------|-----------|
| H | -1.074534 | -2.630728 | -2.399921 | H | -2.566053 | 2.980646  | -0.569031 |
| H | 0.076620  | -2.028614 | -3.598301 | C | -5.064715 | 2.788469  | -3.526816 |
| C | 0.054231  | 0.648961  | -2.890383 | H | -5.395853 | 0.749059  | -2.945338 |
| H | 0.865846  | 0.369900  | -3.569340 | C | -4.381905 | 3.976846  | -3.255885 |
| H | 0.384524  | 1.470846  | -2.251414 | H | -2.949226 | 4.941187  | -1.964058 |
| H | -0.795848 | 0.986224  | -3.489359 | H | -5.763908 | 2.736233  | -4.356676 |
| C | 3.516656  | -3.156046 | -0.780075 | H | -4.547969 | 4.856065  | -3.871996 |
| C | 4.359099  | -3.801541 | 0.136565  | C | -4.983611 | -0.397645 | -0.671469 |
| C | 3.865617  | -3.153409 | -2.134411 | C | -5.135797 | -1.684207 | -1.197024 |
| C | 5.531101  | -4.421702 | -0.292009 | C | -6.046106 | 0.174215  | 0.043650  |
| H | 4.090675  | -3.828643 | 1.188512  | C | -6.327012 | -2.389664 | -1.005083 |
| C | 5.034735  | -3.785079 | -2.563907 | H | -4.325070 | -2.132647 | -1.759171 |
| H | 3.220226  | -2.663112 | -2.853236 | C | -7.229298 | -0.533377 | 0.241104  |
| C | 5.872474  | -4.417635 | -1.646202 | H | -5.947502 | 1.179554  | 0.442558  |
| H | 6.173291  | -4.914776 | 0.431911  | C | -7.374977 | -1.819977 | -0.284204 |
| H | 5.288182  | -3.780155 | -3.620122 | H | -6.431290 | -3.387160 | -1.422754 |
| H | 6.781825  | -4.907231 | -1.982133 | H | -8.039960 | -0.077767 | 0.802218  |
| C | 1.430253  | -3.388812 | 0.628341  | H | -8.299434 | -2.370029 | -0.134284 |
| C | 0.855034  | -2.981712 | 1.838169  | C | 1.924258  | 1.917749  | 1.531937  |
| C | 1.191556  | -4.699872 | 0.180191  | H | 1.649749  | 2.260099  | 2.534831  |
| C | 0.083371  | -3.870402 | 2.593686  | H | 2.663340  | 1.117118  | 1.647883  |
| H | 0.983077  | -1.971457 | 2.209285  | C | 2.531126  | 3.070730  | 0.729534  |
| C | 0.416183  | -5.581464 | 0.927750  | H | 1.781741  | 3.860969  | 0.603775  |
| H | 1.626292  | -5.028926 | -0.758173 | H | 2.803770  | 2.731314  | -0.279616 |
| C | -0.135605 | -5.170682 | 2.144574  | C | 3.783363  | 3.673292  | 1.394366  |
| H | -0.352239 | -3.531562 | 3.528090  | H | 4.531519  | 2.882029  | 1.545335  |
| H | 0.248661  | -6.591419 | 0.564749  | H | 3.513544  | 4.037363  | 2.395882  |
| H | -0.731234 | -5.860730 | 2.735386  | C | 4.415738  | 4.818073  | 0.591636  |
| C | -3.963619 | 1.704812  | -1.645238 | H | 4.694906  | 4.449645  | -0.406634 |
| C | -3.273897 | 2.898602  | -1.387630 | H | 3.664577  | 5.603939  | 0.426214  |
| C | -4.856665 | 1.665605  | -2.729499 | C | 5.649687  | 5.433731  | 1.263354  |
| C | -3.488212 | 4.025214  | -2.187815 | H | 6.400041  | 4.648368  | 1.430483  |

H 5.371445 5.802200 2.260157  
 C 6.276764 6.574865 0.455225  
 H 6.596959 6.229870 -0.535111  
 H 7.153857 6.993869 0.960477  
 H 5.560544 7.390453 0.302032  
 H -2.937273 1.641736 0.806800  
 C -3.154080 -0.292868 1.634545  
 C -3.618326 0.275517 2.826893  
 C -2.981084 -1.681433 1.571936  
 C -3.922887 -0.526503 3.928145  
 H -3.722357 1.354285 2.896790  
 C -3.288809 -2.485374 2.668927  
 H -2.610320 -2.142678 0.661720  
 C -3.763594 -1.910229 3.850245  
 H -4.277770 -0.067666 4.846479  
 H -3.156155 -3.560986 2.599181  
 H -4.003157 -2.537032 4.704776  
 H 2.513048 -1.053096 1.400915  
 C 3.751464 -0.328096 -0.169182  
 C 4.892015 -0.367312 0.643612  
 C 3.836470 0.308045 -1.412112  
 C 6.091766 0.203649 0.221714  
 H 4.839111 -0.843587 1.619258  
 C 5.035466 0.883411 -1.836544  
 H 2.961809 0.376358 -2.049749  
 C 6.167607 0.831045 -1.023227  
 H 6.963261 0.165625 0.868684  
 H 5.080779 1.379153 -2.802007  
 H 7.098807 1.282637 -1.352265  
 Br -0.896492 3.041853 1.724289

<sup>2</sup>TS16-R

B3LYP/BSI SCF energy: -2935.546199a.u.  
 M06/BSII SCF energy in solution: -2934.200745a.u.  
 M06/BSII free energy in solution: -2933.239189a.u.

C 0.380032 -2.015545 -0.764631  
 N 0.799578 -1.175578 0.107173  
 O 1.094623 -3.139642 -0.931612  
 C 2.146689 -3.190387 0.108615  
 C 1.960106 -1.772907 0.816786  
 C -1.887113 -0.947188 -1.201670  
 N -1.855824 -0.089285 -0.250322  
 O -3.028244 -1.021639 -1.916991  
 C -3.952453 0.016569 -1.452517  
 Ni -0.165857 0.520240 0.857624  
 C -0.842742 -1.950276 -1.665240  
 C -1.521199 -3.351447 -1.674981  
 H -0.805705 -4.101380 -2.010759  
 H -1.866055 -3.633840 -0.675674  
 H -2.373823 -3.340647 -2.354991  
 C -0.380222 -1.593873 -3.107642  
 H -1.250926 -1.510224 -3.761897  
 H 0.194849 -0.664850 -3.134480  
 H 0.256840 -2.398534 -3.483679  
 C -4.105785 1.030360 -2.592776  
 C -4.400070 2.378603 -2.350736  
 C -4.023789 0.591975 -3.922387  
 C -4.594415 3.268984 -3.409396  
 H -4.484389 2.749898 -1.334086  
 C -4.208086 1.482626 -4.979106  
 H -3.813591 -0.451654 -4.127414  
 C -4.494098 2.825737 -4.727604  
 H -4.820724 4.310067 -3.198173

|   |           |           |           |   |           |           |           |
|---|-----------|-----------|-----------|---|-----------|-----------|-----------|
| H | -4.131544 | 1.123905  | -6.001476 | H | 2.305301  | -7.736539 | 1.289439  |
| H | -4.639386 | 3.518826  | -5.550860 | H | -0.369101 | -5.222394 | 3.531654  |
| C | -5.294051 | -0.660772 | -1.150588 | H | 0.608752  | -7.472330 | 3.093707  |
| C | -5.396116 | -2.052804 | -1.043608 | C | 0.614303  | 2.442169  | -1.603304 |
| C | -6.449008 | 0.112046  | -0.967984 | C | 1.754053  | 1.796738  | -2.286486 |
| C | -6.622316 | -2.656693 | -0.758371 | C | 1.560997  | 3.546356  | -1.135265 |
| H | -4.518479 | -2.670440 | -1.188074 | H | 1.369192  | 4.538828  | -1.566910 |
| C | -7.670452 | -0.490829 | -0.673933 | H | 1.723116  | 3.633781  | -0.057728 |
| H | -6.401403 | 1.191197  | -1.060773 | N | 2.627619  | 2.804034  | -1.848280 |
| C | -7.763884 | -1.879610 | -0.569605 | O | 1.945547  | 0.821957  | -3.002449 |
| H | -6.679962 | -3.738952 | -0.684472 | C | 3.902543  | 3.202740  | -2.235053 |
| H | -8.551657 | 0.128008  | -0.532077 | C | 4.466698  | 4.365741  | -1.683463 |
| H | -8.717170 | -2.349606 | -0.346471 | C | 4.628219  | 2.456937  | -3.185115 |
| C | 3.491407  | -3.384267 | -0.580464 | C | 5.739670  | 4.773954  | -2.076073 |
| C | 4.642063  | -3.564212 | 0.202784  | H | 3.911373  | 4.938369  | -0.947267 |
| C | 3.618006  | -3.382790 | -1.972559 | C | 5.899553  | 2.881344  | -3.562328 |
| C | 5.889088  | -3.728585 | -0.394396 | H | 4.180467  | 1.566183  | -3.609351 |
| H | 4.560806  | -3.570860 | 1.285065  | C | 6.464681  | 4.037249  | -3.014806 |
| C | 4.869975  | -3.550408 | -2.571369 | H | 6.166559  | 5.673534  | -1.641746 |
| H | 2.738738  | -3.251212 | -2.591409 | H | 6.453411  | 2.302418  | -4.296165 |
| C | 6.008508  | -3.722300 | -1.786712 | H | 7.456608  | 4.358988  | -3.316656 |
| H | 6.768790  | -3.860720 | 0.228712  | C | -0.757830 | 2.624163  | -2.143817 |
| H | 4.948742  | -3.545844 | -3.654817 | H | -1.166049 | 1.690522  | -2.535557 |
| H | 6.981174  | -3.851124 | -2.252682 | H | -1.443451 | 3.021409  | -1.391003 |
| C | 1.756751  | -4.379762 | 1.002546  | H | -0.750238 | 3.345300  | -2.978261 |
| C | 2.284531  | -5.655863 | 0.751727  | C | -0.589958 | 2.371750  | 1.493654  |
| C | 0.783337  | -4.246958 | 2.006326  | H | -1.545942 | 2.225917  | 2.011592  |
| C | 1.875934  | -6.760749 | 1.498509  | H | -0.759405 | 3.079125  | 0.671990  |
| H | 3.023602  | -5.788526 | -0.029864 | C | 0.446961  | 2.933215  | 2.472747  |
| C | 0.376812  | -5.354243 | 2.753211  | H | 0.561755  | 2.238403  | 3.312663  |
| H | 0.325346  | -3.287425 | 2.228613  | H | 1.439919  | 2.996020  | 1.999590  |
| C | 0.923314  | -6.613699 | 2.507177  | C | 0.089287  | 4.326345  | 3.026497  |

H -0.016409 5.036647 2.192122  
H -0.897712 4.273964 3.507551  
C 1.115568 4.869123 4.029622  
H 2.105942 4.909608 3.552035  
H 1.212748 4.160304 4.864055  
C 0.767780 6.256802 4.583946  
H 0.673484 6.966874 3.750351  
H -0.221403 6.217509 5.060388  
C 1.797145 6.783832 5.589265  
H 2.790533 6.866355 5.132833  
H 1.521760 7.774482 5.966980  
H 1.887067 6.112485 6.450971  
Br -0.430856 -0.607989 3.113526  
C 3.163510 -0.858616 0.915873  
C 3.751580 -0.244460 -0.197906  
C 3.724444 -0.648189 2.183470  
C 4.893710 0.541752 -0.043519  
H 3.324804 -0.380938 -1.186606  
C 4.865093 0.141157 2.337662  
H 3.257435 -1.099806 3.054492  
C 5.455561 0.732782 1.221185  
H 5.346171 1.005300 -0.913841  
H 5.285079 0.294669 3.327653  
H 6.345371 1.346032 1.333443  
H 1.620200 -1.933833 1.839365  
C -3.167413 0.598913 -0.186238  
H -2.974598 1.659534 -0.349889  
C -3.856576 0.461351 1.157827  
C -4.496021 1.579456 1.706765  
C -3.903125 -0.752027 1.851593  
C -5.184094 1.486864 2.916777  
H -4.447062 2.535974 1.191127

C -4.588149 -0.847285 3.061589  
H -3.383129 -1.620126 1.462254  
C -5.233965 0.269018 3.595629  
H -5.670074 2.365530 3.330998  
H -4.605206 -1.792955 3.594656  
H -5.762286 0.192646 4.541531

### <sup>2</sup>TS16-S

B3LYP/BSI SCF energy: -2935.542778a.u.

M06/BSII SCF energy in solution: -2934.209605a.u.

M06/BSII free energy in solution: -2933.246007a.u.

C 2.488427 -0.962908 -0.492347  
N 1.942876 0.092379 -0.006992  
O 3.838057 -0.999690 -0.541247  
C 4.306536 0.104135 0.334316  
C 3.062446 1.051711 0.267770  
C 0.369888 -2.325453 -0.773687  
N -0.432088 -1.553278 -0.125054  
O -0.140619 -3.477076 -1.250687  
C -1.612160 -3.378676 -1.127186  
Ni -0.088917 0.330193 0.673556  
C 1.847219 -2.199327 -1.078595  
C 2.558247 -3.458632 -0.503910  
H 3.621238 -3.417013 -0.741330  
H 2.456055 -3.507792 0.583993  
H 2.125602 -4.359219 -0.941021  
C 2.040771 -2.159040 -2.622627  
H 1.600228 -3.051085 -3.071105  
H 1.560466 -1.278868 -3.056444  
H 3.107211 -2.132129 -2.857436  
C -2.115106 -2.891270 -2.493745

|   |           |           |           |   |           |           |           |
|---|-----------|-----------|-----------|---|-----------|-----------|-----------|
| C | -2.761817 | -1.668532 | -2.700047 | C | 4.533335  | -0.537886 | 1.714018  |
| C | -1.880915 | -3.724162 | -3.603060 | C | 5.654701  | -1.367288 | 1.884676  |
| C | -3.169072 | -1.286905 | -3.983882 | C | 3.637144  | -0.392206 | 2.782221  |
| H | -2.960539 | -0.969027 | -1.897300 | C | 5.877802  | -2.029975 | 3.088839  |
| C | -2.282968 | -3.342871 | -4.879544 | H | 6.360033  | -1.487201 | 1.068581  |
| H | -1.384769 | -4.678949 | -3.456985 | C | 3.867355  | -1.054675 | 3.992665  |
| C | -2.933612 | -2.119694 | -5.074319 | H | 2.754064  | 0.232799  | 2.700876  |
| H | -3.658594 | -0.325658 | -4.101989 | C | 4.983604  | -1.873241 | 4.151326  |
| H | -2.094439 | -4.001987 | -5.722345 | H | 6.753585  | -2.663086 | 3.200135  |
| H | -3.251923 | -1.823259 | -6.069812 | H | 3.164368  | -0.919869 | 4.809483  |
| C | -2.165598 | -4.755968 | -0.791156 | H | 5.160321  | -2.382497 | 5.094520  |
| C | -1.351963 | -5.776998 | -0.288331 | C | -0.963047 | 1.922718  | -1.800637 |
| C | -3.534994 | -5.002183 | -0.963022 | C | -2.424212 | 2.097511  | -1.715061 |
| C | -1.897547 | -7.020573 | 0.035784  | N | -2.267660 | 3.410873  | -1.252615 |
| H | -0.291631 | -5.600483 | -0.153126 | C | -3.144384 | 4.449604  | -0.963868 |
| C | -4.080255 | -6.240383 | -0.627645 | C | -4.533170 | 4.274146  | -1.122711 |
| H | -4.174720 | -4.225294 | -1.370438 | C | -2.643412 | 5.685459  | -0.519834 |
| C | -3.262254 | -7.256036 | -0.128822 | C | -5.393626 | 5.329238  | -0.832603 |
| H | -1.251242 | -7.805062 | 0.418965  | H | -4.905849 | 3.317988  | -1.469704 |
| H | -5.143719 | -6.413160 | -0.764889 | C | -3.522172 | 6.728649  | -0.235306 |
| H | -3.685218 | -8.223619 | 0.125100  | H | -1.573777 | 5.819542  | -0.392811 |
| C | 5.598737  | 0.672273  | -0.226724 | C | -4.899816 | 6.560047  | -0.388685 |
| C | 6.203774  | 1.748618  | 0.437969  | H | -6.463682 | 5.187834  | -0.957312 |
| C | 6.218063  | 0.142604  | -1.362747 | H | -3.124644 | 7.678367  | 0.111511  |
| C | 7.393755  | 2.294798  | -0.037087 | H | -5.580313 | 7.376023  | -0.165316 |
| H | 5.744384  | 2.156864  | 1.333650  | C | -0.181873 | 1.156759  | -2.803381 |
| C | 7.416165  | 0.686888  | -1.833674 | H | 0.861142  | 1.045979  | -2.502504 |
| H | 5.765369  | -0.696743 | -1.877775 | H | -0.624920 | 0.170847  | -2.965857 |
| C | 8.005489  | 1.765377  | -1.176506 | H | -0.181531 | 1.679666  | -3.775131 |
| H | 7.845858  | 3.132553  | 0.485694  | C | -1.969990 | 0.491438  | 1.199894  |
| H | 7.886334  | 0.262909  | -2.716520 | H | -2.060059 | -0.367263 | 1.876270  |
| H | 8.935359  | 2.189240  | -1.544191 | H | -2.505319 | 0.268919  | 0.269426  |



C -2.598019 1.719533 1.851766  
 H -2.194875 1.857501 2.859425  
 H -2.342717 2.631105 1.300572  
 C -4.134137 1.606970 1.926901  
 H -4.537625 1.494159 0.910892  
 H -4.407495 0.690143 2.470886  
 C -4.794705 2.815121 2.603895  
 H -4.503736 3.729463 2.069168  
 H -4.402187 2.920884 3.625662  
 C -6.325535 2.732254 2.655453  
 H -6.712891 2.610464 1.634472  
 H -6.624159 1.827158 3.202947  
 C -6.975004 3.960259 3.302214  
 H -6.723555 4.872741 2.749411  
 H -8.067093 3.874841 3.327328  
 H -6.628190 4.094806 4.333447  
 Br 0.596309 2.057453 2.269616  
 C 3.108723 2.159017 -0.775833  
 C 3.331882 1.903783 -2.137057  
 C 2.934702 3.486001 -0.363385  
 C 3.383675 2.947983 -3.059868  
 H 3.483842 0.885562 -2.480728  
 C 2.985283 4.533668 -1.286003  
 H 2.738675 3.694887 0.683585  
 C 3.210240 4.268096 -2.636922  
 H 3.564589 2.731150 -4.108909  
 H 2.848054 5.556120 -0.945586  
 H 3.252875 5.081538 -3.355664  
 H 2.872536 1.517736 1.230508  
 C -1.706863 -2.316734 0.025193  
 H -2.546769 -1.651981 -0.149855  
 C -1.855762 -2.890994 1.428837

C -3.144249 -3.044032 1.958602  
 C -0.760688 -3.285477 2.205074  
 C -3.335318 -3.588743 3.227135  
 H -4.004711 -2.726681 1.375796  
 C -0.948956 -3.826740 3.478374  
 H 0.248845 -3.152584 1.831598  
 C -2.235990 -3.982552 3.992751  
 H -4.341809 -3.694933 3.621159  
 H -0.085954 -4.119619 4.069464  
 H -2.381779 -4.398591 4.985314  
 C -0.786299 3.356614 -1.306449  
 H -0.303426 3.472599 -0.331563  
 H -0.351847 4.057222 -2.032624  
 O -3.431338 1.439421 -1.953508

**<sup>2</sup>IM10-R**

B3LYP/BSI SCF energy: -2935.570518a.u.

M06/BSII SCF energy in solution: -2934.228284a.u.

M06/BSII free energy in solution: -2933.260689a.u.

C 0.683774 -2.001220 -0.412025  
 N 1.030417 -0.924511 0.187219  
 O 1.518404 -3.053271 -0.323017  
 C 2.616116 -2.720238 0.603081  
 C 2.246985 -1.218819 0.998390  
 C -1.713212 -1.357560 -0.999890  
 N -1.787391 -0.285898 -0.303245  
 O -2.836071 -1.747692 -1.643242  
 C -3.856413 -0.713035 -1.481846  
 Ni -0.112598 0.815424 0.507833  
 C -0.568809 -2.333848 -1.207754  
 C -1.079802 -3.730233 -0.738921

|   |           |           |           |   |          |           |           |
|---|-----------|-----------|-----------|---|----------|-----------|-----------|
| H | -0.300896 | -4.475990 | -0.894081 | C | 6.366784 | -2.865487 | -0.097678 |
| H | -1.338035 | -3.722677 | 0.324335  | H | 5.128423 | -2.509434 | 1.619496  |
| H | -1.961750 | -4.008587 | -1.317178 | C | 5.209285 | -3.298053 | -2.167026 |
| C | -0.206344 | -2.400781 | -2.717892 | H | 3.059576 | -3.285076 | -2.062835 |
| H | -1.094554 | -2.657504 | -3.298504 | C | 6.404083 | -3.148357 | -1.465661 |
| H | 0.208021  | -1.450972 | -3.059482 | H | 7.290544 | -2.743804 | 0.460471  |
| H | 0.542460  | -3.182527 | -2.868350 | H | 5.224128 | -3.519341 | -3.230474 |
| C | -4.023860 | -0.018954 | -2.840707 | H | 7.356825 | -3.250513 | -1.977245 |
| C | -4.444100 | 1.313464  | -2.946723 | C | 2.462683 | -3.714863 | 1.768894  |
| C | -3.821808 | -0.750630 | -4.019600 | C | 3.218874 | -4.896114 | 1.808972  |
| C | -4.644532 | 1.903661  | -4.196589 | C | 1.478339 | -3.523652 | 2.752813  |
| H | -4.623069 | 1.907402  | -2.055741 | C | 3.023400 | -5.840581 | 2.817349  |
| C | -4.012593 | -0.159185 | -5.267659 | H | 3.970044 | -5.082212 | 1.050693  |
| H | -3.511976 | -1.787456 | -3.956465 | C | 1.284733 | -4.469010 | 3.761029  |
| C | -4.424348 | 1.171271  | -5.362328 | H | 0.844602 | -2.641653 | 2.753053  |
| H | -4.968001 | 2.938911  | -4.253748 | C | 2.058949 | -5.628726 | 3.802185  |
| H | -3.840823 | -0.741886 | -6.168083 | H | 3.628056 | -6.743093 | 2.828851  |
| H | -4.572640 | 1.631609  | -6.334603 | H | 0.523763 | -4.290440 | 4.515341  |
| C | -5.155841 | -1.408694 | -1.062801 | H | 1.909457 | -6.360908 | 4.590720  |
| C | -5.145189 | -2.718477 | -0.567581 | C | 0.357278 | 1.851899  | -1.208751 |
| C | -6.383422 | -0.739611 | -1.159140 | C | 1.462659 | 1.264417  | -2.092644 |
| C | -6.331777 | -3.343096 | -0.179939 | C | 1.302688 | 3.095054  | -1.087647 |
| H | -4.208704 | -3.256746 | -0.490927 | H | 0.898600 | 4.035966  | -1.480903 |
| C | -7.566987 | -1.360549 | -0.763037 | H | 1.754102 | 3.267759  | -0.107906 |
| H | -6.423182 | 0.269011  | -1.554773 | N | 2.219561 | 2.420635  | -2.018668 |
| C | -7.547484 | -2.667183 | -0.273479 | O | 1.646403 | 0.240453  | -2.733873 |
| H | -6.300998 | -4.361931 | 0.195715  | C | 3.362502 | 2.875768  | -2.679096 |
| H | -8.506617 | -0.821877 | -0.844759 | C | 3.883470 | 4.142536  | -2.371889 |
| H | -8.470483 | -3.153331 | 0.028638  | C | 3.991653 | 2.080218  | -3.654679 |
| C | 3.936839  | -2.881306 | -0.141508 | C | 5.022550 | 4.604692  | -3.029248 |
| C | 5.145260  | -2.733952 | 0.557734  | H | 3.400648 | 4.755772  | -1.617598 |
| C | 3.982786  | -3.166848 | -1.509285 | C | 5.130671 | 2.558378  | -4.298524 |

H 3.577227 1.107127 -3.888497  
C 5.654862 3.817987 -3.993659  
H 5.417498 5.586138 -2.781861  
H 5.611712 1.938416 -5.050170  
H 6.542539 4.181233 -4.502452  
C -0.849674 2.128662 -2.114728  
H -1.280181 1.200720 -2.495469  
H -1.638388 2.690758 -1.608190  
H -0.546821 2.721528 -2.990770  
C -0.971246 2.532664 1.111995  
H -1.859926 2.112860 1.588850  
H -1.262458 3.132202 0.248482  
C -0.151808 3.356455 2.097124  
H 0.108378 2.745637 2.965590  
H 0.793438 3.686666 1.647232  
C -0.917677 4.609710 2.572824  
H -1.197003 5.224709 1.704570  
H -1.859217 4.296340 3.044027  
C -0.112235 5.462815 3.561707  
H 0.831910 5.772255 3.089855  
H 0.169200 4.844671 4.425684  
C -0.861712 6.708019 4.053075  
H -1.147035 7.323973 3.188862  
H -1.802625 6.398741 4.528284  
C -0.047386 7.554973 5.036558  
H 0.884471 7.907048 4.578953  
H -0.607762 8.435422 5.368654  
H 0.222278 6.976688 5.927699  
Br -0.323375 -0.018786 2.924749  
C 3.341086 -0.170877 0.946911  
C 3.975058 0.235580 -0.235474  
C 3.764253 0.384057 2.164469

C 5.018036 1.161337 -0.194741  
H 3.658375 -0.175213 -1.187588  
C 4.806950 1.311250 2.205715  
H 3.266374 0.090149 3.084421  
C 5.439399 1.698281 1.024003  
H 5.498830 1.464328 -1.119149  
H 5.119951 1.728682 3.158581  
H 6.254019 2.416835 1.049449  
H 1.893216 -1.216084 2.028070  
C -3.178241 0.224336 -0.378994  
H -3.126969 1.239501 -0.770737  
C -3.878911 0.285084 0.965608  
C -4.728076 1.366151 1.235505  
C -3.738410 -0.719296 1.928356  
C -5.435066 1.438417 2.435888  
H -4.834461 2.163746 0.503204  
C -4.442147 -0.648815 3.130055  
H -3.053809 -1.542050 1.756719  
C -5.294550 0.426152 3.386352  
H -6.086584 2.285711 2.629685  
H -4.312974 -1.430294 3.872725  
H -5.837925 0.479817 4.325315

#### <sup>2</sup>IM10-S

B3LYP/BSI SCF energy: -2935.578078a.u.

M06/BSII SCF energy in solution: -2934.23585a.u.

M06/BSII free energy in solution: -2933.268863a.u.

C 2.049771 -1.678395 0.098104  
N 1.823857 -0.419228 0.033678  
O 3.331835 -2.074026 0.215285  
C 4.204352 -0.885354 0.254570

|    |           |           |           |   |           |           |           |
|----|-----------|-----------|-----------|---|-----------|-----------|-----------|
| C  | 3.113409  | 0.283958  | 0.277649  | H | -5.139651 | -3.185425 | -1.318191 |
| C  | -0.371686 | -2.484187 | -0.033920 | C | -5.461661 | -5.688491 | 0.958611  |
| N  | -0.960955 | -1.369485 | 0.183837  | H | -3.847232 | -6.489267 | 2.141037  |
| O  | -1.149968 | -3.523753 | -0.397475 | H | -6.844209 | -4.685829 | -0.359358 |
| C  | -2.494392 | -2.994507 | -0.701344 | H | -6.209568 | -6.359045 | 1.371705  |
| Ni | -0.076677 | 0.519385  | 0.475386  | C | 5.084650  | -0.903264 | -0.993309 |
| C  | 1.089100  | -2.856521 | 0.143733  | C | 6.074977  | 0.079006  | -1.158085 |
| C  | 1.221729  | -3.498048 | 1.560794  | C | 4.935692  | -1.874131 | -1.989152 |
| H  | 2.244735  | -3.848464 | 1.710376  | C | 6.885771  | 0.092088  | -2.290355 |
| H  | 0.980662  | -2.764997 | 2.335233  | H | 6.210464  | 0.839292  | -0.395687 |
| H  | 0.541949  | -4.350451 | 1.639124  | C | 5.747371  | -1.859052 | -3.127590 |
| C  | 1.503766  | -3.886143 | -0.938792 | H | 4.190666  | -2.651701 | -1.874702 |
| H  | 0.877083  | -4.775060 | -0.865160 | C | 6.723790  | -0.877379 | -3.283463 |
| H  | 1.391879  | -3.472181 | -1.945383 | H | 7.643831  | 0.862469  | -2.397283 |
| H  | 2.544617  | -4.174986 | -0.787482 | H | 5.615158  | -2.623277 | -3.888272 |
| C  | -2.605954 | -2.962089 | -2.234008 | H | 7.355684  | -0.867185 | -4.166778 |
| C  | -3.152018 | -1.890697 | -2.950500 | C | 5.010809  | -1.011122 | 1.558825  |
| C  | -2.189567 | -4.103150 | -2.941333 | C | 6.339407  | -1.462111 | 1.553090  |
| C  | -3.270959 | -1.960759 | -4.343668 | C | 4.391784  | -0.783912 | 2.798860  |
| H  | -3.465872 | -0.977025 | -2.458257 | C | 7.039943  | -1.644102 | 2.746499  |
| C  | -2.302384 | -4.166381 | -4.327114 | H | 6.837292  | -1.674485 | 0.614865  |
| H  | -1.777322 | -4.945681 | -2.395706 | C | 5.093800  | -0.966064 | 3.990432  |
| C  | -2.847759 | -3.092046 | -5.036120 | H | 3.350453  | -0.481515 | 2.859038  |
| H  | -3.690903 | -1.115011 | -4.880186 | C | 6.422821  | -1.390156 | 3.970794  |
| H  | -1.970904 | -5.056843 | -4.853889 | H | 8.069935  | -1.987887 | 2.713704  |
| H  | -2.939903 | -3.139997 | -6.117393 | H | 4.591441  | -0.777181 | 4.934712  |
| C  | -3.523701 | -3.957481 | -0.115052 | H | 6.968926  | -1.528407 | 4.899658  |
| C  | -3.175401 | -4.898470 | 0.860109  | C | -0.457889 | 1.225827  | -1.416717 |
| C  | -4.855133 | -3.896236 | -0.548899 | C | -1.842982 | 1.761921  | -1.715670 |
| C  | -4.137535 | -5.760610 | 1.389421  | N | -1.387207 | 3.061721  | -1.861720 |
| H  | -2.148850 | -4.964602 | 1.200105  | C | -1.996141 | 4.283305  | -2.162023 |
| C  | -5.817100 | -4.750046 | -0.011939 | C | -3.386862 | 4.359320  | -2.359827 |

|   |           |           |           |    |           |           |           |
|---|-----------|-----------|-----------|----|-----------|-----------|-----------|
| C | -1.212292 | 5.443134  | -2.266273 | Br | 0.730028  | 0.321558  | 2.919576  |
| C | -3.970106 | 5.588861  | -2.654559 | C  | 3.342383  | 1.501521  | -0.596251 |
| H | -3.979599 | 3.455928  | -2.281727 | C  | 3.327066  | 1.458549  | -1.998064 |
| C | -1.815373 | 6.665119  | -2.561720 | C  | 3.594275  | 2.729325  | 0.032235  |
| H | -0.138649 | 5.384143  | -2.116043 | C  | 3.561399  | 2.610331  | -2.747991 |
| C | -3.194749 | 6.747485  | -2.757534 | H  | 3.150116  | 0.518793  | -2.508463 |
| H | -5.044907 | 5.640854  | -2.805725 | C  | 3.830917  | 3.884879  | -0.716420 |
| H | -1.199639 | 7.557051  | -2.638633 | H  | 3.601773  | 2.780096  | 1.117944  |
| H | -3.660283 | 7.701103  | -2.987229 | C  | 3.815452  | 3.827526  | -2.110173 |
| C | -0.011509 | 0.208499  | -2.468687 | H  | 3.551320  | 2.555606  | -3.832849 |
| H | 1.010551  | -0.133080 | -2.309221 | H  | 4.024510  | 4.825402  | -0.208827 |
| H | -0.667428 | -0.664357 | -2.467787 | H  | 4.000606  | 4.722956  | -2.696669 |
| H | -0.066881 | 0.648243  | -3.476199 | H  | 3.037423  | 0.652771  | 1.301889  |
| C | -1.627678 | 1.595750  | 1.196931  | C  | -2.418029 | -1.565955 | -0.011780 |
| H | -1.823086 | 0.975107  | 2.070796  | H  | -2.761286 | -0.793974 | -0.700161 |
| H | -2.462121 | 1.536224  | 0.502209  | C  | -3.199863 | -1.410887 | 1.282057  |
| C | -1.275954 | 3.020138  | 1.586075  | C  | -4.478903 | -0.842400 | 1.230958  |
| H | -0.413103 | 3.021749  | 2.261223  | C  | -2.690735 | -1.823143 | 2.518221  |
| H | -1.010441 | 3.617566  | 0.706430  | C  | -5.242260 | -0.703277 | 2.389996  |
| C | -2.460668 | 3.719088  | 2.290525  | H  | -4.872249 | -0.492962 | 0.279891  |
| H | -3.336586 | 3.702599  | 1.627509  | C  | -3.450494 | -1.678348 | 3.679796  |
| H | -2.736038 | 3.144752  | 3.185070  | H  | -1.685333 | -2.224132 | 2.584946  |
| C | -2.149600 | 5.168376  | 2.686866  | C  | -4.729360 | -1.122612 | 3.618806  |
| H | -1.880024 | 5.740046  | 1.787187  | H  | -6.231264 | -0.257365 | 2.334088  |
| H | -1.263494 | 5.184593  | 3.337498  | H  | -3.036310 | -1.991661 | 4.633621  |
| C | -3.313187 | 5.868840  | 3.400523  | H  | -5.318296 | -1.007464 | 4.524277  |
| H | -4.200163 | 5.846510  | 2.752732  | C  | 0.024212  | 2.696789  | -1.646076 |
| H | -3.580221 | 5.298560  | 4.300700  | H  | 0.485116  | 3.208210  | -0.795707 |
| C | -3.000760 | 7.317935  | 3.788144  | H  | 0.645369  | 2.843440  | -2.535947 |
| H | -2.765868 | 7.922044  | 2.904132  | O  | -2.968158 | 1.291127  | -1.842999 |
| H | -3.848082 | 7.789632  | 4.297323  |    |           |           |           |
| H | -2.137374 | 7.370322  | 4.461552  |    |           |           |           |

<sup>2</sup>TS17-R

|                                                    |           |           |           |           |           |           |           |
|----------------------------------------------------|-----------|-----------|-----------|-----------|-----------|-----------|-----------|
| B3LYP/BSI SCF energy: -2935.54974a.u.              | H         | -3.439314 | -0.684749 | -6.369339 |           |           |           |
| M06/BSII SCF energy in solution: -2934.220763a.u.  | H         | -4.345511 | 1.633852  | -6.360240 |           |           |           |
| M06/BSII free energy in solution: -2933.254866a.u. | C         | -4.807946 | -1.913730 | -1.372757 |           |           |           |
|                                                    | C         | -4.663315 | -3.184296 | -0.799314 |           |           |           |
| C                                                  | 1.023220  | -1.889858 | -0.686176 | C         | -6.100265 | -1.427812 | -1.610066 |
| N                                                  | 1.283452  | -0.813721 | -0.034474 | C         | -5.783333 | -3.947561 | -0.470853 |
| O                                                  | 1.863565  | -2.933673 | -0.508582 | H         | -3.671924 | -3.581552 | -0.618371 |
| C                                                  | 2.656735  | -2.612480 | 0.699901  | C         | -7.220150 | -2.188438 | -1.272262 |
| C                                                  | 2.584670  | -1.049386 | 0.663061  | H         | -6.239720 | -0.457247 | -2.073180 |
| C                                                  | -1.358929 | -1.431024 | -1.349522 | C         | -7.066994 | -3.452320 | -0.702742 |
| N                                                  | -1.538838 | -0.396838 | -0.613007 | H         | -5.649226 | -4.932538 | -0.033021 |
| O                                                  | -2.455034 | -1.979843 | -1.920483 | H         | -8.213182 | -1.792808 | -1.465187 |
| C                                                  | -3.578487 | -1.067171 | -1.702952 | H         | -7.938660 | -4.047432 | -0.446596 |
| Ni                                                 | 0.026637  | 0.852769  | 0.365845  | C         | 4.043396  | -3.216981 | 0.560678  |
| C                                                  | -0.079689 | -2.167600 | -1.694371 | C         | 4.912477  | -3.171879 | 1.660284  |
| C                                                  | -0.372316 | -3.690157 | -1.740218 | C         | 4.480280  | -3.817298 | -0.624108 |
| H                                                  | 0.528819  | -4.224684 | -2.040049 | C         | 6.195973  | -3.706078 | 1.570725  |
| H                                                  | -0.678625 | -4.072277 | -0.762360 | H         | 4.579397  | -2.724169 | 2.592162  |
| H                                                  | -1.163097 | -3.894271 | -2.461862 | C         | 5.763975  | -4.361946 | -0.708826 |
| C                                                  | 0.398820  | -1.691460 | -3.098538 | H         | 3.815067  | -3.860902 | -1.478303 |
| H                                                  | -0.380981 | -1.897006 | -3.836853 | C         | 6.626626  | -4.305831 | 0.384761  |
| H                                                  | 0.624734  | -0.624174 | -3.092292 | H         | 6.858259  | -3.658344 | 2.430296  |
| H                                                  | 1.293659  | -2.254093 | -3.380924 | H         | 6.087155  | -4.828984 | -1.634978 |
| C                                                  | -3.767362 | -0.267211 | -3.000290 | H         | 7.625349  | -4.727397 | 0.316804  |
| C                                                  | -4.288701 | 1.033287  | -3.008517 | C         | 1.887237  | -3.251404 | 1.869682  |
| C                                                  | -3.477706 | -0.876684 | -4.229665 | C         | 1.795020  | -4.653926 | 1.900808  |
| C                                                  | -4.498476 | 1.713241  | -4.211236 | C         | 1.238282  | -2.513693 | 2.867754  |
| H                                                  | -4.547421 | 1.532092  | -2.079492 | C         | 1.076309  | -5.302519 | 2.900954  |
| C                                                  | -3.679194 | -0.196179 | -5.429412 | H         | 2.297656  | -5.237035 | 1.135127  |
| H                                                  | -3.090448 | -1.889163 | -4.241693 | C         | 0.523625  | -3.169381 | 3.877944  |
| C                                                  | -4.189357 | 1.103299  | -5.425771 | H         | 1.271030  | -1.429050 | 2.885799  |
| H                                                  | -4.900511 | 2.721969  | -4.192450 | C         | 0.438160  | -4.559588 | 3.898994  |

|   |           |           |           |    |           |           |           |
|---|-----------|-----------|-----------|----|-----------|-----------|-----------|
| H | 1.020977  | -6.387566 | 2.907355  | H  | -3.438994 | 3.596001  | 2.178759  |
| H | 0.039298  | -2.577123 | 4.649137  | H  | -2.460257 | 2.813192  | 3.412220  |
| H | -0.114184 | -5.063896 | 4.687091  | C  | -2.466833 | 4.971926  | 3.537357  |
| C | -0.103882 | 2.707088  | -0.669522 | H  | -2.491641 | 5.830956  | 2.850803  |
| C | 1.020500  | 2.213219  | -1.630953 | H  | -1.513636 | 5.042562  | 4.079293  |
| C | 0.949845  | 3.754283  | -0.200486 | C  | -3.626047 | 5.090349  | 4.535095  |
| H | 0.688010  | 4.796257  | -0.420388 | H  | -4.579660 | 5.015433  | 3.993969  |
| H | 1.296319  | 3.643190  | 0.827464  | H  | -3.598767 | 4.233579  | 5.221798  |
| N | 1.886223  | 3.190147  | -1.186948 | C  | -3.597906 | 6.392440  | 5.342128  |
| O | 1.101182  | 1.424855  | -2.557711 | H  | -3.659137 | 7.267914  | 4.685229  |
| C | 3.074113  | 3.723411  | -1.702167 | H  | -4.434816 | 6.446511  | 6.046415  |
| C | 3.703939  | 4.777496  | -1.022860 | H  | -2.670758 | 6.479017  | 5.919961  |
| C | 3.619435  | 3.240154  | -2.903742 | Br | 1.358790  | 1.423940  | 2.619901  |
| C | 4.866711  | 5.343028  | -1.543756 | C  | 3.743883  | -0.356170 | -0.034105 |
| H | 3.288181  | 5.143378  | -0.089403 | C  | 3.974689  | -0.465787 | -1.411489 |
| C | 4.781073  | 3.818448  | -3.408968 | C  | 4.646720  | 0.378896  | 0.744119  |
| H | 3.126975  | 2.423291  | -3.415880 | C  | 5.098803  | 0.121465  | -1.990358 |
| C | 5.411683  | 4.870086  | -2.738594 | H  | 3.276250  | -1.007470 | -2.040330 |
| H | 5.347524  | 6.157272  | -1.008861 | C  | 5.770772  | 0.969647  | 0.165092  |
| H | 5.196151  | 3.443376  | -4.340651 | H  | 4.455112  | 0.501411  | 1.805886  |
| H | 6.315908  | 5.315237  | -3.142884 | C  | 6.004065  | 0.835850  | -1.203233 |
| C | -1.214798 | 3.269660  | -1.563385 | H  | 5.265210  | 0.025150  | -3.059592 |
| H | -1.759800 | 2.457918  | -2.053344 | H  | 6.457822  | 1.539989  | 0.783613  |
| H | -1.927158 | 3.893530  | -1.016727 | H  | 6.874346  | 1.300016  | -1.657838 |
| H | -0.779133 | 3.888246  | -2.358926 | H  | 2.513825  | -0.632940 | 1.663457  |
| C | -1.371240 | 2.274701  | 0.938517  | C  | -3.002681 | -0.182788 | -0.517701 |
| H | -1.389065 | 1.424225  | 1.643307  | H  | -3.215085 | 0.862167  | -0.734075 |
| H | -2.267769 | 2.232379  | 0.326965  | C  | -3.528022 | -0.490075 | 0.876780  |
| C | -1.307042 | 3.563649  | 1.741019  | C  | -4.685265 | 0.159001  | 1.327272  |
| H | -0.374505 | 3.593140  | 2.309735  | C  | -2.894372 | -1.402943 | 1.727451  |
| H | -1.327758 | 4.440168  | 1.080278  | C  | -5.205672 | -0.105562 | 2.593206  |
| C | -2.487769 | 3.669660  | 2.726179  | H  | -5.184593 | 0.879109  | 0.683213  |

C -3.410489 -1.665189 2.997982  
H -1.980158 -1.894504 1.413249  
C -4.568088 -1.020489 3.433868  
H -6.103041 0.408229 2.925614  
H -2.896958 -2.369164 3.646108  
H -4.966814 -1.221807 4.423846

**<sup>2</sup>TS17-S**

B3LYP/BSI SCF energy: -2935.550673a.u.

M06/BSII SCF energy in solution: -2934.225606a.u.

M06/BSII free energy in solution: -2933.261196a.u.

C -1.183963 -2.260817 0.519003  
N -1.397936 -1.095234 0.028443  
O -2.214856 -3.135051 0.512640  
C -3.237429 -2.576494 -0.402266  
C -2.827520 -1.054848 -0.392606  
C 1.317502 -2.025845 0.930368  
N 1.475287 -0.885114 0.369882  
O 2.428219 -2.641447 1.397612  
C 3.522204 -1.658674 1.356829  
Ni -0.033689 0.512084 -0.378956  
C 0.065394 -2.851010 1.146919  
C 0.314089 -4.256028 0.525216  
H -0.548620 -4.896346 0.708267  
H 0.461122 -4.185237 -0.556470  
H 1.200823 -4.706176 0.973236  
C -0.182076 -3.000245 2.675574  
H 0.675532 -3.485894 3.144415  
H -0.330549 -2.026386 3.149763  
H -1.069668 -3.614143 2.843091  
C 3.644135 -1.078056 2.774789

C 3.956463 0.263343 3.028428  
C 3.495934 -1.946596 3.868029  
C 4.094358 0.730225 4.339433  
H 4.100360 0.968618 2.216781  
C 3.629851 -1.481499 5.174284  
H 3.275272 -2.993112 3.687597  
C 3.927068 -0.137982 5.415921  
H 4.325908 1.777250 4.509368  
H 3.505571 -2.170465 6.004872  
H 4.029315 0.226387 6.433775  
C 4.792283 -2.392964 0.936808  
C 4.723670 -3.547588 0.146002  
C 6.051742 -1.906114 1.310193  
C 5.887789 -4.198955 -0.260646  
H 3.757838 -3.941277 -0.147160  
C 7.215874 -2.553036 0.894026  
H 6.127745 -1.024680 1.938045  
C 7.138851 -3.703405 0.109002  
H 5.814320 -5.095817 -0.868978  
H 8.182940 -2.159764 1.193819  
H 8.044728 -4.211220 -0.208890  
C -4.618107 -2.879391 0.158204  
C -5.744854 -2.521695 -0.596489  
C -4.802717 -3.508241 1.393062  
C -7.027975 -2.777288 -0.118675  
H -5.615429 -2.049178 -1.565819  
C -6.090630 -3.772025 1.867499  
H -3.939427 -3.797046 1.980996  
C -7.206233 -3.405672 1.116586  
H -7.889617 -2.490194 -0.714312  
H -6.217159 -4.266402 2.826611  
H -8.206742 -3.610127 1.486436



|   |           |           |           |    |           |           |           |
|---|-----------|-----------|-----------|----|-----------|-----------|-----------|
| C | -3.005907 | -3.287048 | -1.745954 | C  | 1.058599  | 3.366628  | -1.355288 |
| C | -3.430821 | -4.620997 | -1.872609 | H  | 0.074974  | 3.328709  | -1.831989 |
| C | -2.317112 | -2.697512 | -2.814921 | H  | 1.090860  | 4.248224  | -0.708820 |
| C | -3.184746 | -5.343184 | -3.037338 | C  | 2.123078  | 3.529609  | -2.456850 |
| H | -3.963108 | -5.092977 | -1.052950 | H  | 3.126669  | 3.504438  | -2.007416 |
| C | -2.077013 | -3.424595 | -3.985916 | H  | 2.062935  | 2.672592  | -3.140150 |
| H | -1.957713 | -1.674012 | -2.769133 | C  | 1.959101  | 4.828436  | -3.257416 |
| C | -2.508149 | -4.744120 | -4.103363 | H  | 2.007938  | 5.688435  | -2.573853 |
| H | -3.526368 | -6.371591 | -3.114875 | H  | 0.956013  | 4.850329  | -3.705569 |
| H | -1.551601 | -2.943013 | -4.805489 | C  | 3.010384  | 4.999540  | -4.360962 |
| H | -2.322723 | -5.302768 | -5.016535 | H  | 4.013553  | 4.971946  | -3.912883 |
| C | -0.120831 | 2.077266  | 1.030931  | H  | 2.959105  | 4.140585  | -5.043743 |
| C | 0.322128  | 3.495999  | 1.446567  | C  | 2.844214  | 6.296805  | -5.159370 |
| N | -0.936493 | 4.015873  | 1.228507  | H  | 2.925870  | 7.175604  | -4.509119 |
| C | -1.504428 | 5.282025  | 1.395391  | H  | 3.606531  | 6.389515  | -5.940540 |
| C | -0.730455 | 6.354372  | 1.873703  | H  | 1.862955  | 6.338254  | -5.645887 |
| C | -2.857999 | 5.480068  | 1.082505  | Br | -1.187296 | 0.978567  | -2.671333 |
| C | -1.320057 | 7.606352  | 2.029405  | C  | -3.646525 | -0.139583 | 0.501958  |
| H | 0.312551  | 6.185902  | 2.113919  | C  | -3.628827 | -0.243430 | 1.899514  |
| C | -3.429298 | 6.741346  | 1.245078  | C  | -4.456284 | 0.837688  | -0.089628 |
| H | -3.454091 | 4.649841  | 0.716731  | C  | -4.405922 | 0.606174  | 2.686765  |
| C | -2.667316 | 7.810836  | 1.718133  | H  | -3.007586 | -0.993770 | 2.378988  |
| H | -0.717449 | 8.431882  | 2.398288  | C  | -5.239137 | 1.686978  | 0.695530  |
| H | -4.477397 | 6.886182  | 0.997910  | H  | -4.458292 | 0.943699  | -1.170685 |
| H | -3.116406 | 8.791611  | 1.842265  | C  | -5.215430 | 1.574173  | 2.086465  |
| C | -0.010705 | 1.195371  | 2.287918  | H  | -4.381901 | 0.511527  | 3.768720  |
| H | -0.551678 | 0.253616  | 2.195217  | H  | -5.862421 | 2.438317  | 0.218925  |
| H | 1.037029  | 0.982035  | 2.513055  | H  | -5.820265 | 2.235802  | 2.699778  |
| H | -0.422106 | 1.736305  | 3.152951  | H  | -2.856681 | -0.638620 | -1.397804 |
| C | 1.299339  | 2.097194  | -0.546585 | C  | 2.933927  | -0.626476 | 0.310492  |
| H | 1.588815  | 1.287844  | -1.240291 | H  | 3.114541  | 0.385589  | 0.665418  |
| H | 2.088035  | 2.220196  | 0.195023  | C  | 3.471646  | -0.718022 | -1.110813 |

C 4.655093 -0.037116 -1.428777  
C 2.827807 -1.454224 -2.111428  
C 5.193267 -0.104336 -2.712271  
H 5.160451 0.549287 -0.665606  
C 3.362362 -1.516575 -3.400215  
H 1.888826 -1.953485 -1.898825  
C 4.547162 -0.846713 -3.703376  
H 6.110439 0.430560 -2.940910  
H 2.842611 -2.081153 -4.168582  
H 4.959248 -0.891983 -4.707174  
C -1.511515 2.738805 0.764667  
H -1.826670 2.758418 -0.281462  
H -2.322634 2.368752 1.398252  
O 1.344580 3.988590 1.886549

**B**

B3LYP/BSI SCF energy: -2418.533127a.u.

M06/BSII SCF energy in solution: -2417.419289a.u.

M06/BSII free energy in solution: -2416.616414a.u.

C -1.540831 -0.163308 -1.172728  
N -1.462674 0.415160 -0.032930  
O -2.761165 -0.372212 -1.693571  
C -3.710569 0.411843 -0.854450  
C -2.852139 0.616250 0.455029  
C 0.781839 -0.979942 -1.128746  
N 1.244242 -0.314197 -0.124766  
O 1.392572 -2.139225 -1.427023  
C 2.263383 -2.463094 -0.269951  
C 2.482786 -1.018209 0.313518  
Ni 0.307823 1.185520 0.764609  
C -0.368673 -0.583391 -2.038429

C -0.768470 -1.748528 -2.966775  
H -1.597906 -1.437868 -3.603335  
H -1.074534 -2.630728 -2.399921  
H 0.076620 -2.028614 -3.598301  
C 0.054231 0.648961 -2.890383  
H 0.865846 0.369900 -3.569340  
H 0.384524 1.470846 -2.251414  
H -0.795848 0.986224 -3.489359  
C 3.516656 -3.156046 -0.780075  
C 4.359099 -3.801541 0.136565  
C 3.865617 -3.153409 -2.134411  
C 5.531101 -4.421702 -0.292009  
H 4.090675 -3.828643 1.188512  
C 5.034735 -3.785079 -2.563907  
H 3.220226 -2.663112 -2.853236  
C 5.872474 -4.417635 -1.646202  
H 6.173291 -4.914776 0.431911  
H 5.288182 -3.780155 -3.620122  
H 6.781825 -4.907231 -1.982133  
C 1.430253 -3.388812 0.628341  
C 0.855034 -2.981712 1.838169  
C 1.191556 -4.699872 0.180191  
C 0.083371 -3.870402 2.593686  
H 0.983077 -1.971457 2.209285  
C 0.416183 -5.581464 0.927750  
H 1.626292 -5.028926 -0.758173  
C -0.135605 -5.170682 2.144574  
H -0.352239 -3.531562 3.528090  
H 0.248661 -6.591419 0.564749  
H -0.731234 -5.860730 2.735386  
C -3.963619 1.704812 -1.645238  
C -3.273897 2.898602 -1.387630

|   |           |           |           |    |           |           |           |
|---|-----------|-----------|-----------|----|-----------|-----------|-----------|
| C | -4.856665 | 1.665605  | -2.729499 | C  | 5.649687  | 5.433731  | 1.263354  |
| C | -3.488212 | 4.025214  | -2.187815 | H  | 6.400041  | 4.648368  | 1.430483  |
| H | -2.566053 | 2.980646  | -0.569031 | H  | 5.371445  | 5.802200  | 2.260157  |
| C | -5.064715 | 2.788469  | -3.526816 | C  | 6.276764  | 6.574865  | 0.455225  |
| H | -5.395853 | 0.749059  | -2.945338 | H  | 6.596959  | 6.229870  | -0.535111 |
| C | -4.381905 | 3.976846  | -3.255885 | H  | 7.153857  | 6.993869  | 0.960477  |
| H | -2.949226 | 4.941187  | -1.964058 | H  | 5.560544  | 7.390453  | 0.302032  |
| H | -5.763908 | 2.736233  | -4.356676 | H  | -2.937273 | 1.641736  | 0.806800  |
| H | -4.547969 | 4.856065  | -3.871996 | C  | -3.154080 | -0.292868 | 1.634545  |
| C | -4.983611 | -0.397645 | -0.671469 | C  | -3.618326 | 0.275517  | 2.826893  |
| C | -5.135797 | -1.684207 | -1.197024 | C  | -2.981084 | -1.681433 | 1.571936  |
| C | -6.046106 | 0.174215  | 0.043650  | C  | -3.922887 | -0.526503 | 3.928145  |
| C | -6.327012 | -2.389664 | -1.005083 | H  | -3.722357 | 1.354285  | 2.896790  |
| H | -4.325070 | -2.132647 | -1.759171 | C  | -3.288809 | -2.485374 | 2.668927  |
| C | -7.229298 | -0.533377 | 0.241104  | H  | -2.610320 | -2.142678 | 0.661720  |
| H | -5.947502 | 1.179554  | 0.442558  | C  | -3.763594 | -1.910229 | 3.850245  |
| C | -7.374977 | -1.819977 | -0.284204 | H  | -4.277770 | -0.067666 | 4.846479  |
| H | -6.431290 | -3.387160 | -1.422754 | H  | -3.156155 | -3.560986 | 2.599181  |
| H | -8.039960 | -0.077767 | 0.802218  | H  | -4.003157 | -2.537032 | 4.704776  |
| H | -8.299434 | -2.370029 | -0.134284 | H  | 2.513048  | -1.053096 | 1.400915  |
| C | 1.924258  | 1.917749  | 1.531937  | C  | 3.751464  | -0.328096 | -0.169182 |
| H | 1.649749  | 2.260099  | 2.534831  | C  | 4.892015  | -0.367312 | 0.643612  |
| H | 2.663340  | 1.117118  | 1.647883  | C  | 3.836470  | 0.308045  | -1.412112 |
| C | 2.531126  | 3.070730  | 0.729534  | C  | 6.091766  | 0.203649  | 0.221714  |
| H | 1.781741  | 3.860969  | 0.603775  | H  | 4.839111  | -0.843587 | 1.619258  |
| H | 2.803770  | 2.731314  | -0.279616 | C  | 5.035466  | 0.883411  | -1.836544 |
| C | 3.783363  | 3.673292  | 1.394366  | H  | 2.961809  | 0.376358  | -2.049749 |
| H | 4.531519  | 2.882029  | 1.545335  | C  | 6.167607  | 0.831045  | -1.023227 |
| H | 3.513544  | 4.037363  | 2.395882  | H  | 6.963261  | 0.165625  | 0.868684  |
| C | 4.415738  | 4.818073  | 0.591636  | H  | 5.080779  | 1.379153  | -2.802007 |
| H | 4.694906  | 4.449645  | -0.406634 | H  | 7.098807  | 1.282637  | -1.352265 |
| H | 3.664577  | 5.603939  | 0.426214  | Br | -0.896492 | 3.041853  | 1.724289  |

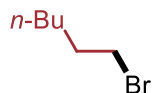

B3LYP/BSI SCF energy: -249.875786a.u.

M06/BSII SCF energy in solution: -249.69958a.u.

M06/BSII free energy in solution: -249.555544a.u.

|    |           |           |           |
|----|-----------|-----------|-----------|
| C  | -0.043382 | -0.157970 | 0.000011  |
| H  | 0.011685  | -0.808644 | 0.880068  |
| H  | 0.011669  | -0.808752 | -0.879969 |
| C  | -1.379011 | 0.607024  | -0.000051 |
| H  | -1.424989 | 1.265116  | -0.878855 |
| H  | -1.425085 | 1.265105  | 0.878752  |
| C  | -2.597457 | -0.326168 | -0.000105 |
| H  | -2.549556 | -0.985380 | -0.878222 |
| H  | -2.549403 | -0.985683 | 0.877778  |
| C  | -3.936645 | 0.421923  | 0.000120  |
| H  | -3.982586 | 1.081432  | -0.877180 |
| H  | -3.982486 | 1.081088  | 0.877684  |
| C  | -5.148636 | -0.515054 | 0.000008  |
| H  | -5.148636 | -1.162984 | -0.883899 |
| H  | -6.088197 | 0.046837  | 0.000115  |
| H  | -5.148590 | -1.163259 | 0.883710  |
| C  | 1.133325  | 0.798683  | -0.000056 |
| H  | 1.176596  | 1.422527  | 0.891919  |
| H  | 1.176602  | 1.422386  | -0.892127 |
| Br | 2.907252  | -0.189726 | 0.000019  |

### <sup>1</sup>TS18

B3LYP/BSI SCF energy: -2418.505177a.u.

M06/BSII SCF energy in solution: -2417.385676a.u.

M06/BSII free energy in solution: -2416.595956a.u.

|    |           |           |           |
|----|-----------|-----------|-----------|
| C  | -1.845992 | -1.188378 | 0.469756  |
| N  | -1.674191 | -0.052125 | -0.095338 |
| O  | -3.120882 | -1.553020 | 0.739026  |
| C  | -3.987305 | -0.603255 | -0.009007 |
| C  | -2.997403 | 0.605407  | -0.209359 |
| C  | 0.620681  | -1.737808 | 0.641376  |
| N  | 1.048544  | -0.745832 | -0.055101 |
| O  | 1.554834  | -2.512784 | 1.235853  |
| C  | 2.849650  | -1.807701 | 1.115044  |
| C  | 2.531280  | -0.782437 | -0.048865 |
| Ni | -0.032829 | 0.558709  | -1.065165 |
| C  | -0.804231 | -2.218596 | 0.858723  |
| C  | -1.000665 | -2.581396 | 2.354813  |
| H  | -2.016851 | -2.946251 | 2.513270  |
| H  | -0.835486 | -1.710505 | 2.995943  |
| H  | -0.292022 | -3.357741 | 2.645783  |
| C  | -1.022601 | -3.483406 | -0.022140 |
| H  | -0.310011 | -4.261337 | 0.262555  |
| H  | -0.888673 | -3.246743 | -1.081138 |
| H  | -2.037187 | -3.859993 | 0.122567  |
| C  | 3.933335  | -2.823130 | 0.791977  |
| C  | 5.258422  | -2.382792 | 0.657403  |
| C  | 3.653198  | -4.182902 | 0.628282  |
| C  | 6.277293  | -3.282420 | 0.353355  |
| H  | 5.494353  | -1.331674 | 0.795276  |
| C  | 4.677162  | -5.085524 | 0.328068  |
| H  | 2.635107  | -4.536494 | 0.739315  |
| C  | 5.990037  | -4.639842 | 0.187075  |
| H  | 7.296786  | -2.923269 | 0.247615  |
| H  | 4.442678  | -6.139193 | 0.206104  |

|   |           |           |           |   |           |          |           |
|---|-----------|-----------|-----------|---|-----------|----------|-----------|
| H | 6.784826  | -5.341656 | -0.047958 | H | -8.070058 | 1.558827 | 0.604888  |
| C | 3.066650  | -1.125994 | 2.476129  | H | -8.419792 | 0.576579 | 2.865686  |
| C | 2.547580  | 0.148635  | 2.754757  | C | 1.178110  | 3.043183 | 0.383835  |
| C | 3.706730  | -1.824860 | 3.510957  | H | 0.306300  | 3.279729 | -0.215593 |
| C | 2.683922  | 0.710835  | 4.025748  | H | 1.014346  | 2.863460 | 1.443718  |
| H | 2.022888  | 0.716687  | 1.993902  | C | 2.539272  | 3.397294 | -0.118988 |
| C | 3.841721  | -1.262563 | 4.779740  | H | 2.616119  | 3.135766 | -1.182678 |
| H | 4.105457  | -2.815332 | 3.321567  | H | 3.310647  | 2.821140 | 0.414275  |
| C | 3.333988  | 0.010727  | 5.041629  | C | 2.875520  | 4.903430 | 0.035584  |
| H | 2.280555  | 1.701225  | 4.216265  | H | 2.784603  | 5.186157 | 1.093352  |
| H | 4.346699  | -1.821186 | 5.562600  | H | 2.122558  | 5.489768 | -0.506485 |
| H | 3.443804  | 0.452535  | 6.027806  | C | 4.276267  | 5.264990 | -0.474517 |
| C | -4.340560 | -1.322529 | -1.321409 | H | 5.026389  | 4.669171 | 0.066423  |
| C | -3.641585 | -1.105515 | -2.519005 | H | 4.363211  | 4.976325 | -1.531675 |
| C | -5.345144 | -2.304036 | -1.300198 | C | 4.613652  | 6.754282 | -0.327616 |
| C | -3.954376 | -1.843197 | -3.664727 | H | 4.519536  | 7.043607 | 0.728144  |
| H | -2.846865 | -0.369870 | -2.590179 | H | 3.867148  | 7.348205 | -0.871930 |
| C | -5.651812 | -3.040476 | -2.442146 | C | 6.016048  | 7.110600 | -0.831767 |
| H | -5.893253 | -2.486817 | -0.381723 | H | 6.787081  | 6.556582 | -0.283671 |
| C | -4.958165 | -2.809573 | -3.632465 | H | 6.226446  | 8.178662 | -0.712067 |
| H | -3.405436 | -1.651320 | -4.581890 | H | 6.128623  | 6.867025 | -1.894439 |
| H | -6.436632 | -3.790668 | -2.403232 | H | -3.091864 | 1.007246 | -1.217458 |
| H | -5.200929 | -3.377176 | -4.526334 | C | -3.092078 | 1.774899 | 0.756729  |
| C | -5.218981 | -0.295779 | 0.824206  | C | -3.348709 | 3.054438 | 0.251607  |
| C | -5.422406 | -0.846915 | 2.092891  | C | -2.895396 | 1.620460 | 2.136004  |
| C | -6.189361 | 0.567790  | 0.295163  | C | -3.421689 | 4.157032 | 1.105519  |
| C | -6.572205 | -0.534138 | 2.823366  | H | -3.471161 | 3.190918 | -0.819278 |
| H | -4.683018 | -1.521526 | 2.508240  | C | -2.968723 | 2.719250 | 2.990339  |
| C | -7.331307 | 0.883935  | 1.027217  | H | -2.689039 | 0.637405 | 2.548260  |
| H | -6.052275 | 0.989726  | -0.696317 | C | -3.233896 | 3.991768 | 2.477399  |
| C | -7.527631 | 0.332889  | 2.296229  | H | -3.616414 | 5.143490 | 0.694827  |
| H | -6.717153 | -0.972495 | 3.806795  | H | -2.820006 | 2.582560 | 4.057893  |

|    |           |           |           |
|----|-----------|-----------|-----------|
| H  | -3.288553 | 4.847815  | 3.143940  |
| H  | 2.896828  | 0.205344  | 0.233478  |
| C  | 3.068603  | -1.086542 | -1.436023 |
| C  | 4.025216  | -0.236041 | -2.001050 |
| C  | 2.616397  | -2.183942 | -2.180772 |
| C  | 4.530016  | -0.478609 | -3.279840 |
| H  | 4.368897  | 0.630936  | -1.442539 |
| C  | 3.118336  | -2.428397 | -3.457263 |
| H  | 1.865641  | -2.848746 | -1.765269 |
| C  | 4.077912  | -1.576774 | -4.010389 |
| H  | 5.266252  | 0.196425  | -3.706131 |
| H  | 2.756267  | -3.281288 | -4.024026 |
| H  | 4.462943  | -1.764830 | -5.008336 |
| Br | -0.555481 | 1.951223  | -2.925476 |

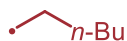

B3LYP/BSI SCF energy: -236.426557a.u.

M06/BSII SCF energy in solution: -236.272528a.u.

M06/BSII free energy in solution: -236.132027a.u.

|   |           |           |           |
|---|-----------|-----------|-----------|
| C | -3.276117 | -0.184447 | 0.000058  |
| H | -3.718950 | -0.534864 | 0.927230  |
| H | -3.718983 | -0.534990 | -0.927058 |
| C | -1.972599 | 0.540901  | -0.000029 |
| H | -1.906258 | 1.195234  | 0.880368  |
| H | -1.906314 | 1.195170  | -0.880483 |
| C | -0.736651 | -0.396520 | -0.000053 |
| H | -0.786203 | -1.054222 | -0.877996 |
| H | -0.786222 | -1.054242 | 0.877869  |
| C | 0.594685  | 0.365146  | -0.000012 |
| H | 0.635718  | 1.026108  | -0.877837 |
| H | 0.635689  | 1.026095  | 0.877823  |

|   |          |           |           |
|---|----------|-----------|-----------|
| C | 1.823994 | -0.552653 | 0.000007  |
| H | 1.782325 | -1.212635 | -0.877179 |
| H | 1.782301 | -1.212646 | 0.877183  |
| C | 3.150787 | 0.213696  | 0.000027  |
| H | 3.237388 | 0.856247  | -0.883718 |
| H | 4.007547 | -0.468222 | 0.000029  |
| H | 3.237369 | 0.856228  | 0.883787  |

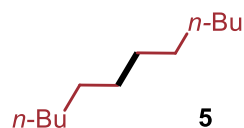

B3LYP/BSI SCF energy: -472.995274a.u.

M06/BSII SCF energy in solution: -472.693751a.u.

M06/BSII free energy in solution: -472.37841a.u.

|   |           |          |           |
|---|-----------|----------|-----------|
| C | 0.000173  | 0.767024 | 0.000000  |
| H | 0.554567  | 1.129557 | 0.877640  |
| H | 0.554567  | 1.129557 | -0.877640 |
| C | -1.405366 | 1.381293 | 0.000000  |
| H | -1.959716 | 1.018690 | 0.877630  |
| H | -1.959716 | 1.018690 | -0.877630 |
| C | -1.405366 | 2.915338 | 0.000000  |
| H | -0.851031 | 3.277995 | -0.877661 |
| H | -0.851031 | 3.277995 | 0.877661  |
| C | -2.810831 | 3.529452 | 0.000000  |
| H | -3.365769 | 3.167441 | -0.877664 |
| H | -3.365769 | 3.167441 | 0.877664  |
| C | -2.811783 | 5.063500 | 0.000000  |
| H | -2.257690 | 5.425045 | -0.877181 |
| H | -2.257690 | 5.425045 | 0.877181  |
| C | -4.219363 | 5.668344 | 0.000000  |
| H | -4.786282 | 5.353214 | -0.883689 |

H -4.186003 6.762936 0.000000  
H -4.786282 5.353214 0.883689  
C -0.000173 -0.767024 0.000000  
H -0.554567 -1.129557 0.877640  
H -0.554567 -1.129557 -0.877640  
C 1.405366 -1.381293 0.000000  
H 1.959716 -1.018690 0.877630  
H 1.959716 -1.018690 -0.877630  
C 1.405366 -2.915338 0.000000  
H 0.851031 -3.277995 -0.877661  
H 0.851031 -3.277995 0.877661  
C 2.810831 -3.529452 0.000000  
H 3.365769 -3.167441 -0.877664  
H 3.365769 -3.167441 0.877664  
C 2.811783 -5.063500 0.000000  
H 2.257690 -5.425045 -0.877181  
H 2.257690 -5.425045 0.877181  
C 4.219363 -5.668344 0.000000  
H 4.786282 -5.353214 -0.883689  
H 4.186003 -6.762936 0.000000  
H 4.786282 -5.353214 0.883689

**<sup>3</sup>LNi<sup>II</sup>Cl<sub>2</sub>**

B3LYP/BSI SCF energy: -1665.537666a.u.

M06/BSII SCF energy in solution: -1665.266492a.u.

M06/BSII free energy in solution: -1665.097161a.u.

C -0.743161 1.578127 -0.000067  
C -2.664553 0.225907 -0.000422  
C -3.483361 1.361757 -0.000352  
C -2.901909 2.625110 -0.000097  
C -1.514287 2.742328 0.000047

C 0.743158 1.578129 0.000070  
C 2.664551 0.225911 0.000425  
C 3.483358 1.361761 0.000357  
C 2.901905 2.625114 0.000103  
C 1.514282 2.742330 -0.000042  
H -4.561084 1.242427 -0.000491  
H -3.523293 3.515388 -0.000019  
H -1.048936 3.719947 0.000262  
H 4.561081 1.242433 0.000496  
H 3.523288 3.515393 0.000026  
H 1.048930 3.719949 -0.000256  
C 3.216067 -1.170336 0.000730  
H 2.861966 -1.714337 0.883383  
H 2.862352 -1.714547 -0.881947  
H 4.307996 -1.163399 0.000983  
C -3.216066 -1.170341 -0.000729  
H -2.861969 -1.714337 -0.883386  
H -2.862346 -1.714554 0.881944  
H -4.307996 -1.163405 -0.000977  
N 1.325704 0.359415 0.000269  
N -1.325706 0.359413 -0.000266  
Ni 0.000001 -1.190432 -0.000001  
Cl 0.001198 -1.994857 -2.088766  
Cl -0.001193 -1.994875 2.088758

**[Si]H**

B3LYP/BSI SCF energy: -753.57108a.u.

M06/BSII SCF energy in solution: -753.392347a.u.

M06/BSII free energy in solution: -753.215797a.u.

Si 0.000061 -0.000084 0.448361  
H 0.000049 -0.000175 1.936726

O -1.273053 -0.875168 -0.121041  
O 1.394561 -0.664971 -0.121013  
O -0.121318 1.540077 -0.120910  
C -1.470409 -2.265196 0.147756  
H -0.688764 -2.847802 -0.356319  
H -1.384081 -2.459306 1.227418  
C -2.846596 -2.676201 -0.350052  
H -2.935894 -2.487281 -1.423794  
H -3.016039 -3.742936 -0.169226  
H -3.627908 -2.108364 0.163918  
C -1.226217 2.406011 0.148725  
H -2.122160 2.019677 -0.353795  
H -1.436010 2.429129 1.228655  
C -0.895120 3.802988 -0.350724  
H -0.688450 3.785003 -1.424759  
H -1.734115 4.483047 -0.169236  
H -0.012041 4.196371 0.161604  
C 2.696914 -0.141037 0.148638  
H 2.810419 0.827970 -0.353987  
H 2.821738 0.029267 1.228552  
C 3.741196 -1.126371 -0.350568  
H 3.622346 -1.296583 -1.424576  
H 4.749636 -0.739777 -0.169116  
H 3.640302 -2.087730 0.161945

**LIF**

B3LYP/BSI SCF energy: -107.416714a.u.  
M06/BSII SCF energy in solution: -107.468704a.u.  
M06/BSII free energy in solution: -107.485726a.u.

F 0.000000 0.000000 0.387959  
Li 0.000000 0.000000 -1.163878

**2a**

B3LYP/BSI SCF energy: -761.209091a.u.  
M06/BSII SCF energy in solution: -761.002738a.u.  
M06/BSII free energy in solution: -760.87066a.u.

C -2.278847 1.844061 0.606077  
H -1.693137 2.702570 0.915347  
H -3.356850 1.944078 0.623643  
C -1.688212 0.702661 0.227948  
C -2.566717 -0.476462 -0.129706  
C -0.220108 0.519815 0.123588  
C 0.404278 -0.709814 0.379059  
C 0.602163 1.605959 -0.237127  
C 1.789539 -0.856547 0.297836  
H -0.192020 -1.569443 0.660351  
C 1.979348 1.475362 -0.317887  
H 0.148083 2.560913 -0.482824  
C 2.587802 0.239382 -0.048802  
H 2.229699 -1.823813 0.508871  
H 2.608261 2.311569 -0.605111  
O 3.944781 0.209280 -0.161504  
C 4.612594 -1.021917 0.070435  
H 5.674045 -0.822010 -0.082818  
H 4.457482 -1.379532 1.096301  
H 4.285761 -1.797811 -0.633521  
F -2.488566 -1.459429 0.808026  
F -3.870217 -0.145131 -0.229811  
F -2.202396 -1.032748 -1.304518

**<sup>1</sup>TS1-A**

B3LYP/BSI SCF energy: -2526.568348a.u.



M06/BSII SCF energy in solution: -2526.126315a.u.

M06/BSII free energy in solution: -2525.74973a.u.

C 3.285849 1.325157 -0.017931  
C 1.532819 2.835151 0.295143  
C 2.418102 3.916523 0.187891  
C 3.767670 3.678359 -0.037484  
C 4.213284 2.365493 -0.141777  
C 3.690650 -0.104076 -0.105908  
C 2.973638 -2.334665 -0.129477  
C 4.293987 -2.779433 -0.260386  
C 5.327981 -1.852755 -0.308365  
C 5.027216 -0.497834 -0.229018  
H 2.036993 4.927869 0.278673  
H 4.467368 4.503483 -0.131395  
H 5.260701 2.163204 -0.323860  
H 4.492676 -3.843782 -0.320232  
H 6.359010 -2.179469 -0.404534  
H 5.823356 0.234447 -0.255614  
C 1.826188 -3.299745 -0.068833  
H 1.299648 -3.189905 0.884802  
H 1.118884 -3.077646 -0.874195  
H 2.177754 -4.329656 -0.165008  
C 0.068080 3.062316 0.529336  
H -0.522856 2.636741 -0.286466  
H -0.257147 2.564070 1.446646  
H -0.147768 4.130366 0.613019  
N 2.698202 -1.017293 -0.054664  
N 1.973572 1.567111 0.187827  
Ni 0.794804 -0.277475 0.123170  
Si -2.636228 0.335520 0.259075  
H -0.751423 0.206977 0.334023

O -2.462425 -1.316875 0.612484  
O -4.300771 0.511014 0.208621  
O -2.235786 1.200034 -1.071464  
C -5.181160 0.223156 1.288911  
H -5.020330 0.945460 2.100674  
H -4.975740 -0.776744 1.699669  
C -6.619293 0.296825 0.797487  
H -7.316698 0.093326 1.617089  
H -6.836116 1.291719 0.397150  
H -6.795273 -0.435055 0.002995  
C -3.110811 1.712157 -2.090722  
H -4.047631 2.057027 -1.643481  
H -2.587488 2.574621 -2.517211  
C -3.368714 0.666460 -3.164606  
H -3.953344 -0.166601 -2.760332  
H -3.936384 1.105582 -3.992967  
H -2.422180 0.276355 -3.547788  
C -3.249030 -2.388110 0.055898  
H -3.695429 -2.935809 0.894916  
H -4.067772 -1.960657 -0.532352  
C -2.382038 -3.304647 -0.792564  
H -1.889692 -2.742158 -1.590539  
H -1.605637 -3.776367 -0.182232  
H -2.997327 -4.095869 -1.235642  
Cl 0.407156 -0.722210 -2.089113  
Cl 0.900690 -0.885984 2.523541  
Li -1.221006 -0.741797 2.032356  
F -2.324989 0.923453 1.795690

**<sup>3</sup>TS1-A**

B3LYP/BSI SCF energy: -2526.586206a.u.

M06/BSII SCF energy in solution: -2526.14201a.u.

M06/BSII free energy in solution: -2525.767971a.u.

C 3.320400 1.330342 0.067509  
C 1.510262 2.814090 0.147104  
C 2.387109 3.906088 0.195650  
C 3.758287 3.690253 0.188196  
C 4.234807 2.386351 0.118634  
C 3.762113 -0.086229 -0.038685  
C 3.077869 -2.319495 -0.172588  
C 4.409125 -2.744921 -0.252649  
C 5.430868 -1.803189 -0.222388  
C 5.109677 -0.454274 -0.113517  
H 1.979819 4.910135 0.237599  
H 4.450766 4.525650 0.229108  
H 5.300423 2.199956 0.102138  
H 4.626791 -3.804041 -0.336440  
H 6.469554 -2.113759 -0.283403  
H 5.896987 0.287870 -0.091526  
C 1.934229 -3.290907 -0.190732  
H 1.375262 -3.216879 0.748530  
H 1.253912 -3.040809 -1.011398  
H 2.290988 -4.316348 -0.311702  
C 0.025978 3.031666 0.144327  
H -0.449168 2.488512 -0.675797  
H -0.424061 2.653608 1.066731  
H -0.200356 4.097324 0.057421  
N 2.783638 -1.010468 -0.070359  
N 1.984493 1.551653 0.095782  
Ni 0.836709 -0.208107 0.041601  
Si -2.771179 0.342241 0.293587  
H -0.744696 0.255525 0.335326  
O -2.509693 -1.268452 0.725152

O -4.433411 0.475137 0.270203  
O -2.381057 1.105071 -1.093566  
C -5.282636 0.192167 1.379382  
H -5.125386 0.942990 2.165424  
H -5.035126 -0.788265 1.811824  
C -6.731646 0.208423 0.916983  
H -7.404850 0.007170 1.757015  
H -6.987555 1.184444 0.494039  
H -6.900895 -0.551114 0.147469  
C -3.264593 1.559545 -2.134229  
H -4.221980 1.870015 -1.705714  
H -2.775819 2.437289 -2.570276  
C -3.458068 0.482980 -3.190811  
H -4.008309 -0.370460 -2.780358  
H -4.034783 0.880889 -4.033607  
H -2.489303 0.131837 -3.555579  
C -3.213376 -2.407616 0.190553  
H -3.624660 -2.961415 1.042702  
H -4.056895 -2.054677 -0.412641  
C -2.279668 -3.284400 -0.628728  
H -1.827818 -2.717156 -1.447212  
H -1.473122 -3.678840 -0.002903  
H -2.835356 -4.132394 -1.044670  
Cl 0.457319 -0.673514 -2.199585  
Cl 0.960875 -0.928438 2.508032  
Li -1.129694 -0.593147 1.983234  
F -2.393776 1.041514 1.753690

**<sup>3</sup>TS1-B**

B3LYP/BSI SCF energy: -2426.671085a.u.

M06/BSII SCF energy in solution: -2426.202335a.u.

M06/BSII free energy in solution: -2425.878024a.u.

C -3.577013 0.848302 -0.705396  
 C -2.462360 2.864855 -0.286134  
 C -3.467033 3.579394 -0.951664  
 C -4.550029 2.899933 -1.493305  
 C -4.611151 1.516008 -1.369232  
 C -3.597692 -0.631112 -0.519331  
 C -2.737883 -2.457188 0.655915  
 C -3.664127 -3.314732 0.047759  
 C -4.546724 -2.806218 -0.896625  
 C -4.523279 -1.444708 -1.181959  
 H -3.388244 4.658088 -1.029317  
 H -5.343408 3.439381 -2.001839  
 H -5.460338 0.974426 -1.764870  
 H -3.676278 -4.365733 0.315876  
 H -5.255809 -3.458011 -1.398077  
 H -5.208877 -1.032443 -1.910863  
 C -1.764701 -2.981361 1.675359  
 H -0.809544 -3.217591 1.196334  
 H -1.581637 -2.237549 2.453666  
 H -2.147404 -3.895751 2.135859  
 C -1.283191 3.572302 0.316240  
 H -1.223369 3.351377 1.386759  
 H -0.352118 3.223062 -0.141291  
 H -1.362818 4.651568 0.168304  
 N -2.699719 -1.147388 0.347066  
 N -2.534294 1.521322 -0.171994  
 Ni -1.085255 0.355045 0.882296  
 C 0.734505 -0.513968 1.202285  
 H 1.181834 0.131719 1.956691  
 H 0.599293 -1.517524 1.607479  
 C 1.537105 -0.538094 -0.043191

C 1.325237 -1.841952 -0.835164  
 C 2.998150 -0.150204 0.004438  
 C 3.727050 0.219334 -1.135483  
 C 3.695058 -0.239790 1.223072  
 C 5.088627 0.505414 -1.072069  
 H 3.220269 0.307598 -2.088639  
 C 5.053672 0.035350 1.300105  
 H 3.170523 -0.543700 2.120978  
 C 5.763216 0.413932 0.153176  
 H 5.607889 0.801979 -1.975533  
 H 5.586927 -0.036767 2.242157  
 O 7.088766 0.671093 0.329521  
 C 7.857593 1.056907 -0.799838  
 H 8.874962 1.204829 -0.434632  
 H 7.861197 0.277612 -1.572490  
 H 7.491578 1.994429 -1.237328  
 F 1.879426 -2.865244 -0.143026  
 F 0.015791 -2.147803 -0.995823  
 F 1.881405 -1.841417 -2.058047  
 Cl 0.646119 0.820463 -1.296729  
 Cl -1.436078 1.267608 2.969855

**<sup>3</sup>TS1-C**

B3LYP/BSI SCF energy: -2419.054739a.u.

M06/BSII SCF energy in solution: -2418.618544a.u.

M06/BSII free energy in solution: -2418.245688a.u.

C -2.986110 0.839682 -0.556986  
 C -1.751298 2.635596 0.324353  
 C -2.632265 3.548936 -0.268209  
 C -3.706327 3.080957 -1.014570  
 C -3.889698 1.708494 -1.167364

C -3.067776 -0.637838 -0.672153  
C -2.075286 -2.678164 -0.056390  
C -3.045497 -3.385972 -0.774156  
C -4.041224 -2.689114 -1.449586  
C -4.059379 -1.298155 -1.399139  
H -2.458763 4.611681 -0.142767  
H -4.395780 3.777246 -1.481766  
H -4.716412 1.331347 -1.755540  
H -3.007856 -4.469250 -0.795395  
H -4.800387 -3.223577 -2.012117  
H -4.829060 -0.743508 -1.920062  
C -0.973077 -3.368270 0.694383  
H -0.001055 -3.117457 0.256404  
H -0.960196 -3.043277 1.740043  
H -1.097685 -4.452537 0.663624  
C -0.543086 3.067756 1.099473  
H -0.521336 2.582152 2.080953  
H 0.362142 2.777199 0.550354  
H -0.535186 4.150377 1.242149  
N -2.105753 -1.332849 -0.023805  
N -1.955619 1.314118 0.177681  
Ni -0.805212 -0.141417 0.963975  
Si 1.977480 0.045948 -0.494570  
H 0.746406 -0.578317 0.297656  
O 2.912274 -0.321136 0.906787  
O 2.705264 -0.945824 -1.623348  
O 2.257603 1.696587 -0.450543  
C 3.988640 -1.558480 -1.530231  
H 3.847165 -2.640851 -1.398154  
H 4.540053 -1.189901 -0.657658  
C 4.771232 -1.293479 -2.810560  
H 5.740109 -1.805442 -2.780879

H 4.213820 -1.651530 -3.680961  
H 4.948154 -0.221398 -2.939754  
C 3.269219 2.370817 0.301808  
H 2.920851 3.405441 0.418564  
H 3.366414 1.925819 1.296298  
C 4.612419 2.360203 -0.417327  
H 4.512171 2.768573 -1.427644  
H 5.344692 2.964200 0.131223  
H 5.002337 1.340522 -0.491698  
C 2.827339 -1.517268 1.645114  
H 1.771730 -1.795845 1.811491  
H 3.293769 -2.351387 1.095622  
C 3.515853 -1.342883 2.993841  
H 4.567781 -1.073138 2.856093  
H 3.031022 -0.548862 3.569828  
H 3.469675 -2.270730 3.574837  
Cl -1.229429 -0.181278 3.136787  
Cl 0.326665 0.445751 -2.052210

#### <sup>4</sup>IM1-A

B3LYP/BSI SCF energy: -2526.604169a.u.

M06/BSII SCF energy in solution: -2526.162861a.u.

M06/BSII free energy in solution: -2525.791218a.u.

C -3.924951 1.394273 0.202240  
C -2.016464 2.743453 -0.061633  
C -2.831795 3.882704 -0.120171  
C -4.208282 3.768947 0.024318  
C -4.768957 2.502964 0.168419  
C -4.416343 -0.003355 0.175840  
C -3.776950 -2.205944 -0.297841  
C -5.123961 -2.601750 -0.291184

C -6.118815 -1.678670 0.002716  
C -5.767146 -0.347599 0.216291  
H -2.368264 4.849210 -0.283217  
H -4.842186 4.649785 -0.005865  
H -5.843285 2.381128 0.226624  
H -5.371191 -3.632226 -0.522259  
H -7.161299 -1.980926 0.031994  
H -6.529491 0.400284 0.396369  
C -2.692311 -3.173628 -0.671626  
H -1.913405 -2.668520 -1.249513  
H -2.212082 -3.583501 0.220882  
H -3.112481 -3.995356 -1.258010  
C -0.534337 2.850473 -0.261299  
H 0.003180 2.679220 0.676235  
H -0.191731 2.087284 -0.967943  
H -0.275535 3.844009 -0.636658  
N -3.444007 -0.932201 -0.005895  
N -2.571107 1.525497 0.143634  
Ni -1.680389 -0.103508 0.594437  
Si 3.678255 0.394646 0.146032  
H -0.560448 0.631504 1.128500  
O 2.680556 -0.841293 0.620766  
O 4.431238 0.200306 -1.282379  
O 4.797661 0.569887 1.319795  
C 3.833842 0.355162 -2.594788  
H 3.871209 1.419316 -2.856388  
H 2.783881 0.043822 -2.572340  
C 4.627279 -0.471684 -3.589608  
H 4.215683 -0.337609 -4.595236  
H 5.679600 -0.170330 -3.601076  
H 4.574037 -1.535051 -3.337686  
C 6.019829 1.315855 1.203551

H 6.450611 1.164085 0.207179  
H 5.794106 2.383840 1.317267  
C 6.981345 0.857973 2.286666  
H 7.217649 -0.203730 2.168786  
H 7.914161 1.428702 2.230312  
H 6.543874 1.005901 3.278276  
C 3.142682 -2.039504 1.303423  
H 3.946718 -1.755367 1.988146  
H 2.289187 -2.386256 1.891044  
C 3.596111 -3.098510 0.311566  
H 2.785479 -3.357122 -0.376176  
H 4.450855 -2.751924 -0.277530  
H 3.894269 -4.004801 0.849941  
Cl -0.677669 -1.846528 1.569211  
Cl 0.193517 -0.484409 -2.028318  
Li 0.808779 -0.770704 0.072217  
F 2.670217 1.646070 0.061881

**<sup>3</sup>IM1-A**

B3LYP/BSI SCF energy: -2526.60516a.u.

M06/BSII SCF energy in solution: -2526.158808a.u.

M06/BSII free energy in solution: -2525.791667a.u.

C -3.772275 0.950215 -0.867271  
C -2.572525 2.878400 -0.296796  
C -3.439886 3.665983 -1.065114  
C -4.479101 3.063847 -1.763375  
C -4.659641 1.689313 -1.655441  
C -3.942623 -0.509324 -0.631445  
C -3.091070 -2.403130 0.444250  
C -4.157727 -3.177088 -0.029593  
C -5.128907 -2.586926 -0.829639

C -5.026161 -1.234121 -1.137807  
H -3.290553 4.739552 -1.102053  
H -5.153746 3.658646 -2.371898  
H -5.479103 1.207059 -2.172418  
H -4.211781 -4.228244 0.232045  
H -5.962293 -3.171439 -1.207847  
H -5.781451 -0.759303 -1.750784  
C -2.003478 -2.990274 1.295237  
H -1.052172 -2.941929 0.753580  
H -1.898434 -2.405732 2.215119  
H -2.217723 -4.032402 1.544198  
C -1.464436 3.507621 0.498883  
H -1.474205 3.128488 1.524097  
H -0.488240 3.245438 0.081317  
H -1.570958 4.595349 0.505281  
N -3.005028 -1.096186 0.137510  
N -2.730968 1.540713 -0.237739  
Ni -1.418217 0.191523 0.696458  
Si 3.938321 0.210133 -0.331987  
H -0.061450 1.039709 0.909900  
O 2.884978 -0.341324 0.805976  
O 4.611835 -0.902152 -1.306066  
O 5.077989 1.129384 0.363629  
C 3.884545 -1.689918 -2.282807  
H 3.797309 -1.095004 -3.198610  
H 2.871580 -1.899320 -1.920918  
C 4.647890 -2.975763 -2.538391  
H 4.130744 -3.570451 -3.298153  
H 5.660381 -2.762875 -2.894135  
H 4.720654 -3.571932 -1.624030  
C 6.285259 1.623140 -0.250677  
H 6.642395 0.899961 -0.992222

H 6.046730 2.558815 -0.769952  
C 7.327601 1.856987 0.827864  
H 7.574518 0.920831 1.336861  
H 8.242740 2.261568 0.383384  
H 6.959799 2.569312 1.571797  
C 3.193925 -0.729018 2.171207  
H 4.032677 -1.433959 2.150274  
H 3.510988 0.167995 2.712223  
C 1.967495 -1.355524 2.805541  
H 1.125013 -0.657582 2.825381  
H 1.665851 -2.253562 2.258293  
H 2.198350 -1.642518 3.836870  
Cl -2.031114 0.250515 2.944583  
Cl -0.150395 -1.020653 -1.283350  
Li 1.181965 0.285454 -0.067128  
F 2.857328 1.073284 -1.200513

**<sup>1</sup>LNi<sup>II</sup>ClH**

B3LYP/BSI SCF energy: -1205.847476a.u.

M06/BSII SCF energy in solution: -1205.576353a.u.

M06/BSII free energy in solution: -1205.395089a.u.

C -0.334790 1.486663 -0.116879  
C -2.455742 0.694656 0.460796  
C -3.011909 1.949013 0.166458  
C -2.205226 2.971725 -0.314856  
C -0.837428 2.748063 -0.441848  
C 1.113554 1.177513 -0.105616  
C 2.728552 -0.487088 0.256348  
C 3.744493 0.470953 0.162804  
C 3.432491 1.800940 -0.092401  
C 2.095753 2.162947 -0.213747

H -4.074454 2.103675 0.319333  
H -2.629300 3.938717 -0.567946  
H -0.183111 3.536763 -0.791776  
H 4.774234 0.158475 0.296146  
H 4.215407 2.548672 -0.171739  
H 1.820746 3.198782 -0.366430  
C 3.072172 -1.919436 0.551404  
H 2.413111 -2.327467 1.320824  
H 2.935895 -2.541502 -0.338440  
H 4.110875 -1.997935 0.883475  
C -3.310462 -0.403462 1.018234  
H -3.426917 -1.206098 0.284376  
H -2.828079 -0.857881 1.887842  
H -4.289613 -0.015979 1.309838  
N 1.429415 -0.132168 0.093429  
N -1.138266 0.464940 0.270314  
Ni -0.068947 -1.302092 -0.114257  
Cl -1.641661 -2.703047 -0.639101  
H 0.773182 -2.372163 -0.531983

**<sup>3</sup>LNi<sup>II</sup>ClH**

B3LYP/BSI SCF energy: -1205.858244a.u.

M06/BSII SCF energy in solution: -1205.580644a.u.

M06/BSII free energy in solution: -1205.404303a.u.

C -0.742577 1.415569 0.064049  
C -2.664983 0.092937 -0.180736  
C -3.482864 1.208473 0.030374  
C -2.899786 2.451081 0.259905  
C -1.512648 2.562665 0.277391  
C 0.742541 1.415583 0.064050  
C 2.664972 0.092990 -0.180755

C 3.482832 1.208538 0.030375  
C 2.899731 2.451131 0.259928  
C 1.512591 2.562689 0.277414  
H -4.560960 1.091736 0.014150  
H -3.519539 3.327052 0.425425  
H -1.045434 3.523070 0.456037  
H 4.560931 1.091821 0.014149  
H 3.519468 3.327110 0.425466  
H 1.045359 3.523081 0.456081  
C 3.220443 -1.277637 -0.439823  
H 2.837885 -1.988902 0.299968  
H 2.895476 -1.633637 -1.424092  
H 4.312130 -1.275867 -0.406438  
C -3.220428 -1.277705 -0.439783  
H -2.895462 -1.633709 -1.424051  
H -2.837849 -1.988954 0.300012  
H -4.312114 -1.275958 -0.406388  
N 1.324409 0.217179 -0.161745  
N -1.324422 0.217151 -0.161727  
Ni 0.000007 -1.324416 -0.511033  
Cl 0.000063 -2.832602 1.163419  
H -0.000016 -1.327149 -2.069559

**[Si]F-LiCl**

B3LYP/BSI SCF energy: -1320.722383a.u.

M06/BSII SCF energy in solution: -1320.559462a.u.

M06/BSII free energy in solution: -1320.388965a.u.

Cl -3.600969 0.068510 -0.928495  
Si 0.675996 -0.080634 -0.367760  
O 0.608810 1.349705 0.387500  
O -0.403412 -1.227124 0.134931

O 2.181640 -0.671564 -0.379848  
C -0.647191 -1.627292 1.511282  
H -0.776544 -0.724118 2.116917  
H 0.238928 -2.164039 1.866222  
C -1.887656 -2.497944 1.559274  
H -2.087064 -2.797403 2.593211  
H -2.755528 -1.950005 1.178956  
H -1.747055 -3.405667 0.963630  
C 3.406872 0.076944 -0.537144  
H 3.589089 0.210195 -1.609731  
H 3.292288 1.066357 -0.081283  
C 4.540656 -0.695597 0.111404  
H 4.638756 -1.687662 -0.338145  
H 5.484729 -0.158326 -0.024858  
H 4.363188 -0.816800 1.183859  
C -0.496037 2.297031 0.323533  
H -0.342178 2.924110 -0.560938  
H -1.445149 1.762364 0.200888  
C -0.495157 3.131288 1.589721  
H -0.659003 2.503690 2.470747  
H 0.455933 3.658279 1.710895  
H -1.299922 3.871545 1.542561  
F 0.040384 0.054612 -1.874599  
Li -1.728875 -0.844849 -1.299189

**<sup>1</sup>TS2-A**

B3LYP/BSI SCF energy: -2066.89789a.u.

M06/BSII SCF energy in solution: -2066.448405a.u.

M06/BSII free energy in solution: -2066.068224a.u.

C 3.157798 1.342509 -0.293273  
C 1.549418 2.791892 0.554927

C 2.262073 3.903373 0.086017  
C 3.449888 3.703522 -0.611998  
C 3.911685 2.405901 -0.808278  
C 3.588055 -0.073261 -0.441804  
C 2.959012 -2.330560 -0.398862  
C 4.261614 -2.722364 -0.723943  
C 5.247843 -1.756461 -0.892232  
C 4.909093 -0.415742 -0.748896  
H 1.883066 4.904181 0.266265  
H 4.009978 4.548821 -1.001100  
H 4.822785 2.228609 -1.367249  
H 4.487670 -3.777569 -0.832531  
H 6.268448 -2.043052 -1.127458  
H 5.663749 0.354128 -0.851444  
C 1.866207 -3.337352 -0.183253  
H 1.588016 -3.363673 0.875672  
H 0.970480 -3.047652 -0.742631  
H 2.185682 -4.336206 -0.491976  
C 0.252959 2.938340 1.304040  
H -0.564840 2.486764 0.732273  
H 0.319028 2.415094 2.263906  
H 0.017874 3.989094 1.493344  
N 2.642618 -1.024602 -0.261105  
N 1.996759 1.541759 0.353752  
Ni 0.801207 -0.483837 0.250261  
Si -2.625156 -0.213328 0.111057  
H -0.766804 -0.246904 0.468620  
O -4.300169 -0.250997 -0.024180  
O -2.282218 -1.711222 -0.495508  
C -5.166825 0.702462 0.576690  
H -4.836979 1.725821 0.342837  
H -5.136323 0.596500 1.670317



C -6.585240 0.482406 0.070842  
H -7.275135 1.196235 0.533811  
H -6.633566 0.609061 -1.015347  
H -6.923315 -0.530536 0.309657  
C -3.260980 -2.651785 -0.967191  
H -3.958543 -2.900728 -0.159699  
H -3.850129 -2.204792 -1.775646  
C -2.532216 -3.893037 -1.456041  
H -1.953380 -4.346856 -0.645668  
H -3.250352 -4.633708 -1.824931  
H -1.844603 -3.641208 -2.269016  
Cl 1.162969 -1.060546 2.626473  
Li -0.906113 -0.547991 2.271583  
H 0.464080 -0.385597 -1.176611  
F -2.584784 -0.096313 1.809217  
O -2.218805 1.241808 -0.574357  
C -2.746878 1.707699 -1.821008  
H -2.147169 1.281138 -2.635469  
H -3.781150 1.365083 -1.948876  
C -2.676734 3.226469 -1.859485  
H -1.643246 3.566541 -1.744030  
H -3.057701 3.600047 -2.816174  
H -3.275036 3.664597 -1.054376

**<sup>3</sup>TS2-A**

B3LYP/BSI SCF energy: -2066.905646a.u.

M06/BSII SCF energy in solution: -2066.44924a.u.

M06/BSII free energy in solution: -2066.071552a.u.

C 3.315886 1.246860 0.299880  
C 1.486738 2.682246 0.547928  
C 2.324680 3.702561 1.013001

C 3.690041 3.471023 1.131166  
C 4.196257 2.230429 0.762683  
C 3.790732 -0.089006 -0.141209  
C 3.149085 -2.225692 -0.845876  
C 4.486426 -2.610116 -0.982799  
C 5.492315 -1.691983 -0.694801  
C 5.146316 -0.413714 -0.269570  
H 1.895745 4.662424 1.279241  
H 4.353369 4.247084 1.500904  
H 5.256492 2.029197 0.846856  
H 4.724546 -3.616650 -1.309729  
H 6.537068 -1.967793 -0.801549  
H 5.919179 0.313112 -0.053809  
C 2.009635 -3.162628 -1.124116  
H 1.445057 -3.337683 -0.201654  
H 1.325262 -2.711484 -1.851908  
H 2.364713 -4.120563 -1.511233  
C 0.012227 2.912197 0.388746  
H -0.292364 2.696303 -0.638974  
H -0.567666 2.248427 1.033953  
H -0.244682 3.947757 0.624135  
N 2.829738 -0.983915 -0.439692  
N 1.982871 1.472456 0.215938  
Ni 0.876722 -0.233402 -0.365655  
Si -2.906986 0.025483 0.030317  
H -0.864742 -0.014085 -0.186231  
O -4.534375 -0.007871 0.382018  
O -2.537758 -1.597713 0.305901  
C -5.425500 1.093781 0.244881  
H -5.312806 1.545331 -0.748624  
H -5.180545 1.864530 0.990878  
C -6.852884 0.608657 0.450455

H -7.558109 1.442366 0.364087  
H -7.114070 -0.144300 -0.299666  
H -6.968803 0.158921 1.441414  
C -3.535895 -2.629400 0.500572  
H -4.164679 -2.369219 1.357531  
H -4.182152 -2.665253 -0.381627  
C -2.826167 -3.955608 0.709496  
H -2.176601 -3.922637 1.590526  
H -3.561194 -4.753949 0.857953  
H -2.210965 -4.208483 -0.159094  
Cl 0.932777 -1.332719 2.055002  
Li -1.103879 -0.910909 1.491397  
H 0.844388 -0.071405 -1.935124  
F -2.345171 0.766309 1.417854  
O -2.939907 0.834482 -1.389120  
C -2.049256 0.979301 -2.499675  
H -1.016663 0.814734 -2.182288  
H -2.298513 0.200276 -3.231987  
C -2.240266 2.356745 -3.115837  
H -1.986005 3.145189 -2.399809  
H -1.591713 2.465824 -3.991606  
H -3.277174 2.507788 -3.432262

**<sup>1</sup>LNi<sup>II</sup>H<sub>2</sub>**

B3LYP/BSI SCF energy: -746.188992a.u.

M06/BSII SCF energy in solution: -745.910085a.u.

M06/BSII free energy in solution: -745.721484a.u.

C -0.740747 1.047394 -0.033983  
C -2.665086 -0.275852 0.124988  
C -3.468702 0.870547 0.095424  
C -2.885299 2.127415 -0.018085

C -1.499291 2.219743 -0.076609  
C 0.740747 1.047393 -0.033986  
C 2.665087 -0.275853 0.124991  
C 3.468702 0.870546 0.095416  
C 2.885300 2.127412 -0.018106  
C 1.499293 2.219741 -0.076628  
H -4.545882 0.762743 0.161622  
H -3.498658 3.022721 -0.049768  
H -1.020915 3.188350 -0.149916  
H 4.545883 0.762741 0.161615  
H 3.498660 3.022718 -0.049800  
H 1.020917 3.188347 -0.149946  
C 3.289830 -1.635987 0.256799  
H 2.830927 -2.192280 1.077537  
H 3.115367 -2.227334 -0.645914  
H 4.365353 -1.547605 0.432954  
C -3.289828 -1.635989 0.256776  
H -3.115379 -2.227317 -0.645953  
H -2.830915 -2.192299 1.077495  
H -4.365349 -1.547609 0.432946  
N 1.317016 -0.181791 0.041905  
N -1.317016 -0.181790 0.041900  
Ni -0.000001 -1.649807 -0.193893  
H -0.885906 -2.756274 -0.496244  
H 0.885900 -2.756280 -0.496234

**<sup>3</sup>LNi<sup>II</sup>H<sub>2</sub>**

B3LYP/BSI SCF energy: -746.169593a.u.

M06/BSII SCF energy in solution: -745.885539a.u.

M06/BSII free energy in solution: -745.701998a.u.

C -0.740205 -1.077062 0.000098

C -2.662830 0.263478 0.000441  
C -3.480678 -0.869251 0.000476  
C -2.897572 -2.134878 0.000306  
C -1.511645 -2.245010 0.000112  
C 0.740205 -1.077062 -0.000100  
C 2.662830 0.263478 -0.000441  
C 3.480678 -0.869251 -0.000478  
C 2.897572 -2.134878 -0.000310  
C 1.511645 -2.245010 -0.000116  
H -4.559001 -0.751090 0.000627  
H -3.517126 -3.026498 0.000317  
H -1.042684 -3.221305 -0.000041  
H 4.559001 -0.751089 -0.000628  
H 3.517126 -3.026498 -0.000323  
H 1.042684 -3.221305 0.000035  
C 3.213942 1.659389 -0.000593  
H 2.855503 2.203314 -0.881964  
H 2.855686 2.203424 0.880784  
H 4.306306 1.659325 -0.000709  
C -3.213942 1.659389 0.000596  
H -2.855504 2.203312 0.881968  
H -2.855685 2.203426 -0.880780  
H -4.306306 1.659325 0.000711  
N 1.320863 0.143890 -0.000253  
N -1.320863 0.143890 0.000253  
Ni 0.000000 1.732848 0.000002  
H 0.000416 2.085736 1.558806  
H -0.000416 2.085743 -1.558801

**<sup>1</sup>TS3-A**

B3LYP/BSI SCF energy: -1507.381884a.u.

M06/BSII SCF energy in solution: -1506.9118a.u.

M06/BSII free energy in solution: -1506.571113a.u.

C -2.552854 1.802936 -0.270525  
C -0.784301 2.997576 0.686404  
C -1.366998 4.208704 0.300754  
C -2.576455 4.209422 -0.384031  
C -3.175222 2.988631 -0.672690  
C -3.192615 0.492313 -0.573484  
C -3.744913 -1.621036 0.188107  
C -4.424048 -1.907478 -1.005230  
C -4.461233 -0.947190 -2.011737  
C -3.842001 0.281890 -1.797358  
H -0.862979 5.137280 0.545848  
H -3.047186 5.141828 -0.680684  
H -4.130435 2.941535 -1.182276  
H -4.907819 -2.870290 -1.136702  
H -4.966121 -1.151762 -2.951478  
H -3.841283 1.048173 -2.564832  
C -3.660154 -2.623413 1.309599  
H -2.668558 -3.086224 1.320318  
H -3.800626 -2.125053 2.271960  
H -4.406709 -3.414628 1.199660  
C 0.525842 2.971227 1.418386  
H 0.414920 2.426054 2.361352  
H 1.284905 2.439951 0.834109  
H 0.881964 3.985136 1.619220  
N -3.134787 -0.442897 0.384735  
N -1.378010 1.810961 0.406427  
Ni -0.489703 0.166380 0.964802  
C 0.429547 -1.289272 1.887327  
H 1.074124 -0.929384 2.680109  
H -0.278105 -2.057830 2.181169

|                                                    |           |           |           |    |           |           |           |
|----------------------------------------------------|-----------|-----------|-----------|----|-----------|-----------|-----------|
| C                                                  | 0.893962  | -1.231442 | 0.540616  | C  | -2.551831 | 3.210003  | -0.975712 |
| C                                                  | 0.509472  | -2.395478 | -0.355294 | C  | -3.212878 | 0.834422  | -0.376788 |
| C                                                  | 2.281861  | -0.705825 | 0.253867  | C  | -3.631188 | -1.346821 | 0.356639  |
| C                                                  | 2.572188  | 0.092477  | -0.858319 | C  | -4.883522 | -1.338804 | -0.270123 |
| C                                                  | 3.352318  | -1.071880 | 1.089061  | C  | -5.289540 | -0.215843 | -0.980711 |
| C                                                  | 3.870468  | 0.528389  | -1.131205 | C  | -4.450693 | 0.892513  | -1.024992 |
| H                                                  | 1.765735  | 0.390158  | -1.520408 | H  | 0.112213  | 4.932031  | 0.230638  |
| C                                                  | 4.649051  | -0.644180 | 0.835271  | H  | -1.850171 | 5.219924  | -1.294956 |
| H                                                  | 3.164937  | -1.711741 | 1.945616  | H  | -3.411792 | 3.322709  | -1.624049 |
| C                                                  | 4.919209  | 0.161653  | -0.279298 | H  | -5.524009 | -2.210437 | -0.188255 |
| H                                                  | 4.047872  | 1.150354  | -2.000828 | H  | -6.255173 | -0.193455 | -1.476706 |
| H                                                  | 5.472205  | -0.928299 | 1.482835  | H  | -4.766716 | 1.791175  | -1.539378 |
| O                                                  | 6.222281  | 0.534285  | -0.444077 | C  | -3.171887 | -2.534771 | 1.151436  |
| C                                                  | 6.553128  | 1.335299  | -1.566436 | H  | -2.448401 | -3.118864 | 0.576991  |
| H                                                  | 7.629604  | 1.504926  | -1.509894 | H  | -2.674438 | -2.200295 | 2.066525  |
| H                                                  | 6.317261  | 0.828218  | -2.511028 | H  | -4.015601 | -3.181874 | 1.404178  |
| H                                                  | 6.034671  | 2.302815  | -1.541909 | C  | 0.813636  | 2.631972  | 1.572391  |
| F                                                  | 1.330509  | -3.450880 | -0.126269 | H  | 0.494543  | 2.087693  | 2.466568  |
| F                                                  | -0.754542 | -2.834891 | -0.135580 | H  | 1.559920  | 2.012098  | 1.062386  |
| F                                                  | 0.603192  | -2.115762 | -1.673425 | H  | 1.290592  | 3.570512  | 1.866058  |
| H                                                  | -0.092674 | -0.128433 | -0.445063 | N  | -2.806887 | -0.282172 | 0.275125  |
| H                                                  | -0.832634 | 0.411712  | 2.397689  | N  | -1.212567 | 1.853250  | 0.473840  |
|                                                    |           |           |           | Ni | -0.887452 | -0.134700 | 1.137076  |
| <b><sup>3</sup>TS3-A</b>                           |           |           |           | C  | 0.503951  | -2.285202 | 1.443385  |
| B3LYP/BSI SCF energy: -1507.349478a.u.             |           |           |           | H  | 0.967559  | -2.000072 | 2.376965  |
| M06/BSII SCF energy in solution: -1506.870951a.u.  |           |           |           | H  | -0.262469 | -3.046364 | 1.475480  |
| M06/BSII free energy in solution: -1506.535325a.u. |           |           |           | C  | 0.876410  | -1.676194 | 0.243837  |
|                                                    |           |           |           | C  | 0.516407  | -2.454404 | -1.019229 |
| C                                                  | -2.300632 | 2.004592  | -0.309592 | C  | 2.223568  | -0.988217 | 0.158918  |
| C                                                  | -0.364053 | 2.879439  | 0.672200  | C  | 2.483573  | 0.052092  | -0.741395 |
| C                                                  | -0.578600 | 4.114848  | 0.051610  | C  | 3.287697  | -1.432744 | 0.963041  |
| C                                                  | -1.674607 | 4.273908  | -0.791650 | C  | 3.745787  | 0.642218  | -0.838643 |

H 1.681248 0.413652 -1.375080  
C 4.546311 -0.850290 0.886850  
H 3.122310 -2.259134 1.645557  
C 4.787237 0.192782 -0.017355  
H 3.901605 1.444090 -1.550891  
H 5.363815 -1.195628 1.511405  
O 6.055853 0.697557 -0.022381  
C 6.362624 1.732903 -0.940961  
H 7.416312 1.971320 -0.786841  
H 6.214178 1.411405 -1.980023  
H 5.760282 2.632304 -0.756481  
F 1.368018 -3.489889 -1.192854  
F -0.734035 -2.981672 -0.961942  
F 0.570197 -1.717956 -2.150417  
H -0.043247 -0.425770 -0.241948  
H -1.158789 -0.108198 2.698000

#### <sup>1</sup>IM2-A

B3LYP/BSI SCF energy: -1507.425572a.u.

M06/BSII SCF energy in solution: -1506.953547a.u.

M06/BSII free energy in solution: -1506.607084a.u.

C 2.615243 0.994719 0.480628  
C 2.704900 2.034242 -1.615871  
C 3.231559 3.191338 -1.030703  
C 3.414637 3.254509 0.346487  
C 3.114306 2.134709 1.114574  
C 2.379289 -0.285390 1.188726  
C 1.822035 -2.539361 0.926141  
C 2.168233 -2.795146 2.259926  
C 2.594844 -1.754548 3.076027  
C 2.726528 -0.483013 2.527976

H 3.489924 4.033119 -1.664164  
H 3.803486 4.154188 0.813314  
H 3.270014 2.151291 2.186073  
H 2.103613 -3.809869 2.638052  
H 2.854263 -1.935485 4.114719  
H 3.110822 0.331747 3.128563  
C 1.411864 -3.675206 0.028582  
H 0.326884 -3.812107 0.017882  
H 1.732212 -3.487965 -0.997386  
H 1.862395 -4.607516 0.380318  
C 2.506372 1.956604 -3.103040  
H 2.833938 0.987495 -3.485732  
H 1.444806 2.046245 -3.352267  
H 3.060984 2.754170 -3.605267  
N 1.877498 -1.287736 0.420034  
N 2.370423 0.963315 -0.857400  
Ni 1.069380 -0.452225 -1.289993  
C -0.537888 -1.498529 -1.550863  
H -1.114025 -1.183739 -2.423801  
H -0.248448 -2.538094 -1.741935  
C -1.459487 -1.438596 -0.311323  
C -2.570176 -2.485217 -0.388189  
C -2.048357 -0.060319 -0.041227  
C -1.907272 0.540814 1.210651  
C -2.758059 0.646693 -1.026793  
C -2.432713 1.807597 1.489284  
H -1.373885 0.012423 1.997660  
C -3.291183 1.902347 -0.769147  
H -2.897616 0.205179 -2.007568  
C -3.130577 2.494660 0.492119  
H -2.296531 2.235440 2.475808  
H -3.840383 2.447286 -1.530396

O -3.690961 3.734509 0.643882  
C -3.572406 4.368490 1.904052  
H -4.085927 5.327279 1.811618  
H -4.047450 3.782226 2.702054  
H -2.522668 4.548125 2.173437  
F -3.363790 -2.340342 -1.472785  
F -2.053957 -3.746916 -0.449188  
F -3.377265 -2.463170 0.700210  
H -0.899340 -1.731034 0.585621  
H 0.547480 0.232275 -2.438559

**<sup>1</sup>TS4-A**

B3LYP/BSI SCF energy: -1507.404713a.u.

M06/BSII SCF energy in solution: -1506.931353a.u.

M06/BSII free energy in solution: -1506.587178a.u.

C -3.409732 1.629411 0.085003  
C -1.455069 2.752824 -0.517124  
C -2.071378 3.988085 -0.299062  
C -3.388803 4.032643 0.152748  
C -4.071854 2.835100 0.335627  
C -4.072957 0.315577 0.197014  
C -3.746214 -2.001046 0.286000  
C -5.126372 -2.210498 0.266412  
C -5.997520 -1.122039 0.218930  
C -5.462321 0.159779 0.176686  
H -1.517196 4.901866 -0.488514  
H -3.876889 4.982688 0.347413  
H -5.098112 2.834932 0.684265  
H -5.508923 -3.225421 0.292191  
H -7.072424 -1.273085 0.199521  
H -6.110531 1.024768 0.098958

C -2.783238 -3.152105 0.345639  
H -2.091510 -3.127280 -0.500662  
H -2.167492 -3.078660 1.248671  
H -3.313883 -4.108201 0.345020  
C -0.042300 2.679742 -1.025931  
H 0.665837 2.471027 -0.214960  
H 0.050679 1.873628 -1.758292  
H 0.255146 3.622453 -1.492831  
N -3.226181 -0.746770 0.271445  
N -2.099843 1.582863 -0.291507  
Ni -1.348302 -0.240809 0.331940  
C 0.639972 -0.321425 0.838739  
H 0.628493 0.757513 1.037370  
H 1.104259 -0.753022 1.733887  
C 1.565903 -0.626957 -0.363369  
C 1.394696 -2.061601 -0.857280  
C 3.024425 -0.308041 -0.061014  
C 3.674076 0.726219 -0.737220  
C 3.749813 -1.002468 0.923919  
C 4.997123 1.079382 -0.453076  
H 3.142248 1.276437 -1.509914  
C 5.065125 -0.669451 1.215844  
H 3.283262 -1.823294 1.459279  
C 5.700003 0.377965 0.531120  
H 5.460528 1.889950 -1.003247  
H 5.626980 -1.208737 1.971692  
O 6.992337 0.629897 0.895782  
C 7.682103 1.674911 0.231476  
H 8.681374 1.704148 0.669010  
H 7.766689 1.485152 -0.846647  
H 7.193345 2.646130 0.385034  
F 1.504403 -2.972596 0.141916

F 0.178530 -2.255541 -1.430051  
F 2.312292 -2.385598 -1.793432  
H 1.258568 -0.016863 -1.218107  
H -0.414417 -1.137721 1.028343

**2b**

B3LYP/BSI SCF energy: -762.446037a.u.  
M06/BSII SCF energy in solution: -762.239307a.u.  
M06/BSII free energy in solution: -762.084971a.u.

C -2.160945 0.118903 -1.978714  
H -2.077204 1.208596 -1.961115  
H -3.208860 -0.141224 -2.150244  
C -1.649645 -0.496615 -0.663153  
C -2.539169 -0.069836 0.500391  
C -0.178850 -0.211960 -0.401670  
C 0.739253 -1.261585 -0.340462  
C 0.310073 1.097296 -0.248057  
C 2.104092 -1.037804 -0.136467  
H 0.390154 -2.285073 -0.454469  
C 1.660936 1.338517 -0.040987  
H -0.375832 1.937257 -0.277113  
C 2.570996 0.271674 0.015054  
H 2.781166 -1.882679 -0.096659  
H 2.039326 2.348000 0.082634  
O 3.875508 0.615247 0.218863  
C 4.839146 -0.423126 0.293543  
H 5.798878 0.067437 0.462979  
H 4.632689 -1.108511 1.125758  
H 4.888737 -0.998663 -0.640009  
F -2.577635 1.276646 0.655988  
F -3.817377 -0.476428 0.306262

F -2.127505 -0.598235 1.670197  
H -1.779306 -1.583761 -0.715444  
H -1.566485 -0.253990 -2.816116

**<sup>1</sup>LNi<sup>0</sup>**

B3LYP/BSI SCF energy: -744.979533a.u.  
M06/BSII SCF energy in solution: -744.705227a.u.  
M06/BSII free energy in solution: -744.534652a.u.

C -0.719655 0.991086 -0.000041  
C -2.706569 -0.332375 0.000096  
C -3.506564 0.794999 0.000002  
C -2.889404 2.071510 -0.000171  
C -1.516805 2.163545 -0.000207  
C 0.719656 0.991085 0.000042  
C 2.706569 -0.332376 -0.000071  
C 3.506565 0.794998 0.000017  
C 2.889405 2.071509 0.000168  
C 1.516806 2.163544 0.000194  
H -4.586019 0.694223 0.000059  
H -3.497404 2.971166 -0.000347  
H -1.040681 3.137267 -0.000443  
H 4.586019 0.694221 -0.000028  
H 3.497405 2.971165 0.000333  
H 1.040682 3.137266 0.000411  
C 3.283314 -1.723305 -0.000131  
H 2.951111 -2.279804 0.885621  
H 2.951098 -2.279743 -0.885920  
H 4.375644 -1.705578 -0.000139  
C -3.283313 -1.723304 0.000176  
H -2.951097 -2.279821 -0.885561  
H -2.951109 -2.279724 0.885979

H -4.375643 -1.705578 0.000168  
N 1.352585 -0.249778 -0.000037  
N -1.352584 -0.249777 0.000050  
Ni -0.000002 -1.612988 -0.000024

**1c'**

B3LYP/BSI SCF energy: -518.248831a.u.  
M06/BSII SCF energy in solution: -518.012053a.u.  
M06/BSII free energy in solution: -517.852849a.u.

C 2.493539 -0.544160 -0.316352  
C 1.232566 0.175272 -0.196782  
N 0.113139 -0.649149 -0.151886  
C -1.242938 -0.299142 -0.045123  
C -1.695298 1.029351 0.037608  
C -2.179882 -1.348084 -0.021967  
C -3.063490 1.279652 0.140934  
H -0.974892 1.834252 0.019431  
C -3.540813 -1.079105 0.081530  
H -1.834699 -2.378162 -0.085767  
C -3.993813 0.239574 0.164041  
H -3.402420 2.310003 0.204164  
H -4.247751 -1.903738 0.097569  
H -5.055530 0.451453 0.244975  
C 3.793233 0.176173 -0.380758  
H 4.252114 0.003738 -1.367781  
H 3.594436 1.248841 -0.304267  
O 1.171716 1.408153 -0.141151  
C 4.792370 -0.272849 0.704536  
H 5.000324 -1.346488 0.638748  
H 5.742118 0.259676 0.593995  
H 4.402293 -0.066277 1.705680

H 2.492941 -1.633044 -0.354290  
H 0.292526 -1.641525 -0.206042

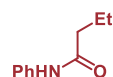

B3LYP/BSI SCF energy: -518.904666a.u.  
M06/BSII SCF energy in solution: -518.667159a.u.  
M06/BSII free energy in solution: -518.492941a.u.

C 1.283818 0.061880 -0.452167  
N 0.162500 -0.709580 -0.236529  
O 1.273152 1.284861 -0.501948  
C -1.181441 -0.307495 -0.076371  
C -2.137135 -1.319620 0.109840  
C -1.591956 1.034779 -0.095269  
C -3.482084 -1.000181 0.273624  
H -1.822043 -2.361140 0.125436  
C -2.944038 1.337028 0.070039  
H -0.855099 1.812123 -0.237495  
C -3.895622 0.333222 0.254550  
H -4.206217 -1.797244 0.416027  
H -3.252411 2.378699 0.053531  
H -4.944005 0.584847 0.382200  
C 3.818794 0.003068 -0.203456  
H 3.818681 0.988348 -0.679938  
H 4.702006 -0.533770 -0.569350  
H 0.312783 -1.707882 -0.208807  
C 3.901486 0.166904 1.317176  
H 4.816494 0.693888 1.605609  
H 3.052879 0.745510 1.694818  
H 3.904490 -0.805080 1.825055  
C 2.565039 -0.748434 -0.667923



H 2.633721 -0.951965 -1.745471

H 2.494840 -1.725065 -0.170585

**1d**

B3LYP/BSI SCF energy: -558.218984a.u.

M06/BSII SCF energy in solution: -557.958025a.u.

M06/BSII free energy in solution: -557.757245a.u.

C 1.057325 0.180021 0.407730

N -0.053401 -0.631602 0.313455

O 1.011764 1.403653 0.362071

C -1.407541 -0.278271 0.127247

C -2.341042 -1.325397 0.058283

C -1.849426 1.049172 0.011276

C -3.694185 -1.055063 -0.124595

H -2.002121 -2.355567 0.148298

C -3.209303 1.302106 -0.171972

H -1.129983 1.853361 0.067001

C -4.138539 0.263412 -0.241571

H -4.400652 -1.878638 -0.175543

H -3.541766 2.332650 -0.260817

H -5.193454 0.476711 -0.384330

C 2.974898 -0.849078 -0.883072

H 2.246016 -1.427836 -1.465533

H 3.850467 -1.498920 -0.757153

C 2.381666 -0.586566 0.529460

H 2.174834 -1.570630 0.974057

C 3.345768 0.169164 1.451437

H 4.326526 -0.317371 1.464396

H 3.465394 1.201719 1.117966

H 2.965983 0.196826 2.477436

H 0.119949 -1.624287 0.380570

C 3.373615 0.403362 -1.671772

H 3.722115 0.125757 -2.671793

H 2.532166 1.092692 -1.780587

H 4.184792 0.948344 -1.179433

**1d'**

B3LYP/BSI SCF energy: -557.568719a.u.

M06/BSII SCF energy in solution: -557.309686a.u.

M06/BSII free energy in solution: -557.123727a.u.

C 1.085032 -0.758081 -0.080969

N 0.121525 0.238126 -0.190347

O 0.795535 -1.940503 0.138602

C -1.277027 0.131915 -0.087986

C -2.022028 1.315537 -0.239544

C -1.952172 -1.076644 0.154951

C -3.410253 1.296399 -0.150693

H -1.505550 2.254839 -0.428030

C -3.344554 -1.076943 0.240560

H -1.380589 -1.985562 0.271937

C -4.083878 0.097003 0.090583

H -3.965122 2.222596 -0.270926

H -3.855288 -2.017393 0.428553

H -5.167211 0.079399 0.160114

C 3.543606 -1.355682 -0.086689

H 3.110479 -2.319571 0.180532

H 4.116846 -1.469869 -1.018633

H 4.270461 -1.060113 0.683644

C 2.477211 -0.322209 -0.243127

C 2.891674 1.103048 -0.494568

H 3.865172 1.099530 -0.999023

H 2.204799 1.601514 -1.192945

H 0.456389 1.173138 -0.363577  
C 3.009957 1.946159 0.797040  
H 3.344417 2.962521 0.565680  
H 2.051854 2.012562 1.322229  
H 3.732988 1.500530 1.486706

**<sup>1</sup>IM4<sup>1c</sup>-R**

B3LYP/BSI SCF energy: -2700.356321a.u.

M06/BSII SCF energy in solution: -2699.148904a.u.

M06/BSII free energy in solution: -2698.327217a.u.

C 1.518533 -0.906995 -1.164047  
N 1.595193 -0.486593 0.044368  
O 2.676894 -1.120254 -1.815703  
C 3.749737 -1.086186 -0.785132  
C 3.036461 -0.259074 0.345191  
H 3.248840 -0.685399 1.322839  
C 3.335347 1.229948 0.419585  
C 3.866361 1.756290 1.603944  
C 3.084489 2.097851 -0.652600  
C 4.160668 3.117427 1.710179  
H 4.031082 1.097898 2.451683  
C 3.382257 3.456272 -0.550872  
H 2.667993 1.713200 -1.578291  
C 3.925199 3.969907 0.630736  
H 4.571133 3.508609 2.636513  
H 3.192133 4.113625 -1.394321  
H 4.160482 5.027633 0.708022  
C -1.010335 -0.986404 -1.235602  
N -1.250351 -0.462487 -0.082007  
O -2.072189 -1.394543 -1.949263  
C -3.270188 -0.776915 -1.327253

C -2.723812 -0.562046 0.137594  
H -3.073527 0.381618 0.556631  
C -3.070398 -1.677383 1.115861  
C -4.265730 -1.582597 1.842637  
C -2.257668 -2.800260 1.305042  
C -4.645961 -2.591076 2.725631  
H -4.898376 -0.708283 1.718407  
C -2.632209 -3.807892 2.196954  
H -1.315071 -2.887918 0.775416  
C -3.828433 -3.708926 2.906233  
H -5.574745 -2.498286 3.281048  
H -1.981666 -4.665717 2.340404  
H -4.117619 -4.490972 3.602264  
Ni 0.091785 -0.046885 1.388154  
C 0.289362 -1.201235 -1.985879  
C 0.357328 -2.678392 -2.464653  
H 1.277256 -2.834501 -3.029738  
H 0.354674 -3.368133 -1.615690  
H -0.499460 -2.900237 -3.102010  
C 0.288119 -0.249058 -3.218004  
H -0.590796 -0.447059 -3.833288  
H 0.260572 0.797992 -2.903454  
H 1.188251 -0.418598 -3.812052  
C -3.510512 0.498639 -2.146691  
C -3.804090 0.331667 -3.513147  
C -3.402306 1.795179 -1.634928  
C -3.980257 1.432014 -4.345787  
H -3.897092 -0.670972 -3.919617  
C -3.582723 2.900864 -2.475920  
H -3.182422 1.977937 -0.588597  
C -3.869319 2.726110 -3.826875  
H -4.208231 1.281197 -5.397304

H -3.484289 3.898241 -2.058310  
H -4.007338 3.587849 -4.473901  
C -4.434694 -1.747246 -1.452298  
C -5.743374 -1.266003 -1.307416  
C -4.236958 -3.113286 -1.681233  
C -6.830594 -2.135510 -1.379559  
H -5.911789 -0.205559 -1.146372  
C -5.327460 -3.980703 -1.765711  
H -3.230625 -3.498083 -1.796882  
C -6.626701 -3.496890 -1.612376  
H -7.837705 -1.745962 -1.262480  
H -5.157502 -5.037558 -1.950517  
H -7.473766 -4.173624 -1.676899  
C 4.987567 -0.437318 -1.379712  
C 6.128848 -0.309613 -0.574577  
C 5.034358 0.019223 -2.700225  
C 7.287019 0.278536 -1.077001  
H 6.112045 -0.677573 0.447284  
C 6.200077 0.602175 -3.205056  
H 4.161991 -0.083987 -3.334839  
C 7.327036 0.737432 -2.396293  
H 8.160455 0.374938 -0.438814  
H 6.222385 0.949318 -4.234170  
H 8.231569 1.192335 -2.789154  
C 3.997508 -2.557254 -0.414624  
C 4.748978 -3.351904 -1.296490  
C 3.434328 -3.161327 0.719228  
C 4.940379 -4.709268 -1.050189  
H 5.190612 -2.900840 -2.179132  
C 3.633179 -4.523298 0.966079  
H 2.837588 -2.596317 1.428149  
C 4.384523 -5.300713 0.086934

H 5.528789 -5.303507 -1.743528  
H 3.195699 -4.967843 1.855205  
H 4.539325 -6.357507 0.285047  
C -1.566989 2.279532 1.813509  
N -0.718192 3.305482 1.414665  
O -2.770293 2.287163 1.506536  
C -1.017911 4.500425 0.736723  
C 0.063052 5.287410 0.300647  
C -2.328798 4.959725 0.513985  
C -0.157539 6.498430 -0.349422  
H 1.078400 4.939624 0.472745  
C -2.531316 6.175604 -0.140825  
H -3.161526 4.365610 0.861466  
C -1.457880 6.952246 -0.580048  
H 0.693667 7.089456 -0.676708  
H -3.549773 6.521459 -0.297896  
H -1.630472 7.896884 -1.086862  
C -1.860618 0.562137 3.632095  
H -2.789901 0.264532 3.141470  
H -1.395620 -0.346579 4.022761  
Br 1.419536 -0.894291 3.293503  
C -0.920992 1.202295 2.607974  
H -0.035558 1.598864 3.119796  
C -2.199099 1.500547 4.803419  
H -2.864679 1.007584 5.521497  
H -1.293198 1.800762 5.342751  
H -2.702109 2.408067 4.451577  
H 0.249215 3.196314 1.686749

<sup>1</sup>IM4<sup>1c</sup>-S

B3LYP/BSI SCF energy: -2700.363449a.u.

M06/BSII SCF energy in solution: -2699.152511a.u.

M06/BSII free energy in solution: -2698.333009a.u.

|    |           |           |           |   |           |           |           |
|----|-----------|-----------|-----------|---|-----------|-----------|-----------|
| C  | 0.367690  | -1.974771 | 0.122547  | H | -9.098231 | -0.665442 | 1.475651  |
| N  | 0.855924  | -0.787750 | 0.136385  | C | -4.161349 | -0.585190 | -2.181068 |
| O  | 1.253155  | -2.989027 | 0.108410  | C | -3.254686 | 0.115905  | -2.991011 |
| C  | 2.586664  | -2.408503 | 0.394138  | C | -5.085026 | -1.444972 | -2.797791 |
| C  | 2.336331  | -0.899508 | 0.028258  | C | -3.283934 | -0.034012 | -4.380574 |
| C  | -2.075947 | -1.312294 | -0.042131 | H | -2.516837 | 0.788544  | -2.566749 |
| N  | -1.878025 | -0.046192 | -0.003867 | C | -5.109610 | -1.595114 | -4.182496 |
| O  | -3.344317 | -1.725900 | -0.228510 | H | -5.792838 | -1.995693 | -2.187151 |
| C  | -4.121027 | -0.524629 | -0.645777 | C | -4.208976 | -0.886370 | -4.980923 |
| C  | -3.201500 | 0.623416  | -0.087206 | H | -2.578496 | 0.525728  | -4.987533 |
| Ni | -0.077799 | 0.985309  | 0.075918  | H | -5.836143 | -2.262170 | -4.637704 |
| C  | -1.077015 | -2.439267 | 0.131655  | H | -4.231528 | -0.996403 | -6.061350 |
| C  | -1.276282 | -3.470036 | -1.012534 | C | 2.846938  | -2.668216 | 1.887550  |
| H  | -0.593986 | -4.310023 | -0.876177 | C | 3.277055  | -1.686958 | 2.788853  |
| H  | -1.086638 | -3.015922 | -1.989532 | C | 2.674512  | -3.984164 | 2.350846  |
| H  | -2.303680 | -3.835367 | -1.000864 | C | 3.521130  | -2.021846 | 4.126642  |
| C  | -1.355060 | -3.117746 | 1.505170  | H | 3.414216  | -0.653057 | 2.488874  |
| H  | -2.375091 | -3.508059 | 1.523130  | C | 2.910304  | -4.310068 | 3.682920  |
| H  | -1.231879 | -2.405124 | 2.325186  | H | 2.358512  | -4.755876 | 1.655664  |
| H  | -0.655833 | -3.942527 | 1.654940  | C | 3.338167  | -3.325751 | 4.578904  |
| C  | -5.508821 | -0.597153 | -0.033721 | H | 3.850718  | -1.246385 | 4.811783  |
| C  | -6.415761 | 0.437824  | -0.304509 | H | 2.768999  | -5.332911 | 4.020708  |
| C  | -5.915706 | -1.660412 | 0.777664  | H | 3.527909  | -3.577321 | 5.618440  |
| C  | -7.697550 | 0.415811  | 0.239753  | C | 3.624708  | -3.128792 | -0.455934 |
| H  | -6.118366 | 1.261128  | -0.947541 | C | 3.273335  | -4.085944 | -1.412667 |
| C  | -7.204769 | -1.684282 | 1.317356  | C | 4.980073  | -2.825543 | -0.263676 |
| H  | -5.226926 | -2.470995 | 0.984822  | C | 4.260071  | -4.726657 | -2.166431 |
| C  | -8.097528 | -0.646973 | 1.054125  | H | 2.229955  | -4.334005 | -1.567804 |
| H  | -8.385859 | 1.227951  | 0.025046  | C | 5.961357  | -3.457881 | -1.023409 |
| H  | -7.507162 | -2.518474 | 1.944060  | H | 5.268976  | -2.097825 | 0.488714  |
|    |           |           |           | C | 5.605064  | -4.413866 | -1.977741 |
|    |           |           |           | H | 3.971362  | -5.471311 | -2.902894 |

H 7.006177 -3.207075 -0.865428  
H 6.370866 -4.911109 -2.565805  
C 2.158494 2.266947 1.411072  
N 2.340301 3.379377 0.608873  
O 3.120842 1.606593 1.847452  
C 3.536335 3.937622 0.130204  
C 3.444330 4.836436 -0.948527  
C 4.797637 3.672926 0.693793  
C 4.584925 5.450891 -1.456467  
H 2.471617 5.040273 -1.389077  
C 5.931347 4.294844 0.168894  
H 4.871372 2.985001 1.523926  
C 5.840089 5.183418 -0.903674  
H 4.490271 6.140224 -2.291068  
H 6.899652 4.081499 0.614337  
H 6.730260 5.662310 -1.300704  
C 0.507508 1.076916 2.929374  
H 1.114384 0.167634 2.882111  
H -0.542567 0.758845 2.949909  
H 2.773660 -0.243387 0.776956  
C 2.807319 -0.419140 -1.335050  
C 3.814214 0.551387 -1.395054  
C 2.253119 -0.897900 -2.530430  
C 4.266586 1.030348 -2.626226  
H 4.223365 0.953539 -0.473318  
C 2.706062 -0.422813 -3.759824  
H 1.463866 -1.643781 -2.506718  
C 3.715509 0.542304 -3.810613  
H 5.035787 1.796197 -2.651924  
H 2.268548 -0.802508 -4.678828  
H 4.061441 0.917364 -4.769585  
H -3.126813 1.436138 -0.807755

C -3.568156 1.235510 1.255039  
C -3.822403 2.609794 1.328020  
C -3.632993 0.472900 2.429781  
C -4.147833 3.210453 2.546029  
H -3.743421 3.215564 0.429941  
C -3.957323 1.070579 3.646549  
H -3.438152 -0.594632 2.396670  
C -4.217318 2.442147 3.707785  
H -4.337601 4.279112 2.584858  
H -4.007064 0.466080 4.547703  
H -4.466994 2.907354 4.657004  
Br -0.689878 2.962827 -1.250450  
C 0.824317 1.818549 4.241301  
H 0.214251 2.723733 4.338525  
H 0.622731 1.183987 5.112412  
H 1.877631 2.112254 4.271270  
H 1.495281 3.716933 0.157905  
C 0.739947 1.924823 1.683102  
H 0.112195 2.821152 1.685294

**<sup>1</sup>TS11<sup>1c</sup>-R**

B3LYP/BSI SCF energy: -2700.337946a.u.

M06/BSII SCF energy in solution: -2699.129349a.u.

M06/BSII free energy in solution: -5893.833697a.u.

C 1.671002 -0.943174 -1.169753  
N 1.683522 -0.417257 -0.001834  
O 2.868211 -1.151072 -1.761150  
C 3.893633 -0.974704 -0.698618  
C 3.091295 -0.106565 0.344294  
H 3.274320 -0.463107 1.356820  
C 3.325467 1.395059 0.341803

|    |           |           |           |   |           |           |           |
|----|-----------|-----------|-----------|---|-----------|-----------|-----------|
| C  | 3.820712  | 2.007910  | 1.499304  | H | -0.206110 | -3.243308 | -2.910196 |
| C  | 3.043277  | 2.192121  | -0.775914 | C | 0.512222  | -0.602471 | -3.338969 |
| C  | 4.045944  | 3.385721  | 1.536682  | H | -0.311284 | -0.927288 | -3.975890 |
| H  | 4.015189  | 1.403590  | 2.380879  | H | 0.408240  | 0.472783  | -3.166638 |
| C  | 3.269796  | 3.567474  | -0.742768 | H | 1.458122  | -0.787729 | -3.851548 |
| H  | 2.652819  | 1.738494  | -1.681498 | C | -3.350720 | 0.433186  | -2.279564 |
| C  | 3.775406  | 4.168808  | 0.413742  | C | -3.518744 | 0.322527  | -3.672439 |
| H  | 4.429993  | 3.844261  | 2.443388  | C | -3.388005 | 1.704161  | -1.697682 |
| H  | 3.053334  | 4.169888  | -1.620360 | C | -3.709154 | 1.450549  | -4.463122 |
| H  | 3.955677  | 5.239880  | 0.437712  | H | -3.501082 | -0.660651 | -4.132742 |
| C  | -0.859124 | -1.139847 | -1.327608 | C | -3.581613 | 2.838388  | -2.496852 |
| N  | -1.142067 | -0.694766 | -0.153592 | H | -3.278077 | 1.851922  | -0.628443 |
| O  | -1.899959 | -1.460242 | -2.122064 | C | -3.740020 | 2.718597  | -3.874313 |
| C  | -3.112882 | -0.874575 | -1.509301 | H | -3.836755 | 1.341374  | -5.536528 |
| C  | -2.622093 | -0.697671 | -0.014526 | H | -3.593147 | 3.815687  | -2.025298 |
| H  | -2.931811 | 0.272585  | 0.373133  | H | -3.887901 | 3.603047  | -4.487569 |
| C  | -3.095354 | -1.753406 | 0.973728  | C | -4.268165 | -1.847090 | -1.703516 |
| C  | -4.278173 | -1.522235 | 1.689095  | C | -5.584696 | -1.383016 | -1.575614 |
| C  | -2.401086 | -2.949656 | 1.187540  | C | -4.052480 | -3.201234 | -1.981313 |
| C  | -4.764383 | -2.471333 | 2.587306  | C | -6.661473 | -2.257632 | -1.712057 |
| H  | -4.813901 | -0.587575 | 1.547159  | H | -5.767543 | -0.331186 | -1.378287 |
| C  | -2.881603 | -3.896802 | 2.093918  | C | -5.132199 | -4.073776 | -2.129661 |
| H  | -1.470633 | -3.138349 | 0.662266  | H | -3.039977 | -3.571845 | -2.089693 |
| C  | -4.066008 | -3.662786 | 2.792889  | C | -6.439369 | -3.607126 | -1.992612 |
| H  | -5.682051 | -2.274839 | 3.134258  | H | -7.674899 | -1.881038 | -1.607529 |
| H  | -2.324696 | -4.815118 | 2.256109  | H | -4.947566 | -5.120809 | -2.352714 |
| H  | -4.437825 | -4.399251 | 3.499397  | H | -7.278268 | -4.287431 | -2.107136 |
| Ni | 0.167931  | -0.441498 | 1.314860  | C | 5.114340  | -0.297568 | -1.297523 |
| C  | 0.483375  | -1.386371 | -1.995959 | C | 6.225578  | -0.065550 | -0.473691 |
| C  | 0.617110  | -2.910645 | -2.274950 | C | 5.172077  | 0.093747  | -2.638411 |
| H  | 1.563459  | -3.109327 | -2.780721 | C | 7.363907  | 0.558296  | -0.978573 |
| H  | 0.599084  | -3.482108 | -1.342611 | H | 6.201203  | -0.380799 | 0.565483  |

C 6.317962 0.712941 -3.145456  
H 4.323297 -0.089289 -3.286782  
C 7.414750 0.950269 -2.318856  
H 8.213734 0.734694 -0.325678  
H 6.348663 1.008032 -4.190533  
H 8.303966 1.432959 -2.713656  
C 4.208162 -2.394153 -0.198801  
C 5.071559 -3.199621 -0.959850  
C 3.599401 -2.951232 0.936135  
C 5.329104 -4.518819 -0.593995  
H 5.548980 -2.786676 -1.842461  
C 3.863163 -4.274344 1.303096  
H 2.916760 -2.379086 1.556072  
C 4.727014 -5.061381 0.543740  
H 6.004635 -5.120938 -1.195080  
H 3.387386 -4.680106 2.191049  
H 4.932644 -6.087463 0.835212  
C -1.983602 2.414242 2.085696  
N -1.082449 3.362915 1.613158  
O -3.150477 2.331126 1.659245  
C -1.321965 4.465606 0.778947  
C -0.206159 5.153305 0.268941  
C -2.613535 4.939355 0.484663  
C -0.376369 6.288814 -0.517673  
H 0.794457 4.789865 0.489564  
C -2.764346 6.080494 -0.303881  
H -3.472485 4.412227 0.875617  
C -1.656973 6.762221 -0.812127  
H 0.498762 6.805720 -0.901770  
H -3.767168 6.442520 -0.515087  
H -1.788904 7.649039 -1.424514  
C -2.339313 0.678049 3.941926

H -3.274064 0.507747 3.403140  
H -1.845309 -0.288603 4.091669  
Br 1.228160 -0.734356 3.449918  
C -1.453275 1.557606 3.129598  
H -0.430299 1.700283 3.464795  
C -2.644752 1.291242 5.328636  
H -3.278624 0.613212 5.909657  
H -1.724455 1.461518 5.896575  
H -3.168532 2.247537 5.230452  
H -0.126034 3.249318 1.920595

**<sup>1</sup>TS11<sup>1c</sup>-S**

B3LYP/BSI SCF energy: -2700.345284a.u.

M06/BSII SCF energy in solution: -2699.135386a.u.

M06/BSII free energy in solution: -2698.320622a.u.

C -0.184942 2.021633 -0.058788  
N -0.708493 0.857284 -0.184910  
O -1.026597 3.041285 0.211036  
C -2.348676 2.465914 0.521583  
C -2.179118 0.986633 -0.023657  
C 2.233911 1.287834 -0.247085  
N 1.983290 0.031634 -0.202595  
O 3.534576 1.648018 -0.330757  
C 4.288456 0.407556 -0.653575  
C 3.278076 -0.689795 -0.149584  
Ni 0.225118 -0.845931 -0.536201  
C 1.261359 2.450678 -0.242624  
C 1.374931 3.183060 -1.611702  
H 0.710418 4.050154 -1.624071  
H 1.104204 2.516273 -2.434839  
H 2.401748 3.521705 -1.763355

|   |           |           |           |   |           |           |           |
|---|-----------|-----------|-----------|---|-----------|-----------|-----------|
| C | 1.661127  | 3.420072  | 0.901843  | H | -1.580566 | 4.484970  | 2.136326  |
| H | 2.696041  | 3.739555  | 0.768213  | C | -2.910092 | 2.869623  | 4.815365  |
| H | 1.564327  | 2.937786  | 1.878951  | H | -3.876354 | 0.943526  | 4.724740  |
| H | 1.013519  | 4.297516  | 0.888113  | H | -1.900499 | 4.761510  | 4.568194  |
| C | 5.621692  | 0.434040  | 0.072688  | H | -3.058862 | 2.991637  | 5.884418  |
| C | 6.513406  | -0.630985 | -0.121697 | C | -3.410827 | 3.311109  | -0.178932 |
| C | 5.991332  | 1.480920  | 0.922236  | C | -3.069701 | 4.307219  | -1.099736 |
| C | 7.743468  | -0.653029 | 0.531293  | C | -4.765524 | 3.088590  | 0.105021  |
| H | 6.245558  | -1.442957 | -0.791691 | C | -4.062471 | 5.063366  | -1.727231 |
| C | 7.228931  | 1.460657  | 1.571295  | H | -2.026744 | 4.497558  | -1.322307 |
| H | 5.313192  | 2.312362  | 1.073975  | C | -5.755019 | 3.836300  | -0.529609 |
| C | 8.106726  | 0.394837  | 1.381358  | H | -5.049692 | 2.332852  | 0.830204  |
| H | 8.420206  | -1.487662 | 0.373434  | C | -5.407801 | 4.829365  | -1.448140 |
| H | 7.503199  | 2.282934  | 2.226097  | H | -3.778383 | 5.836493  | -2.435689 |
| H | 9.067349  | 0.379468  | 1.887752  | H | -6.799426 | 3.645533  | -0.300627 |
| C | 4.458665  | 0.422321  | -2.181285 | H | -6.179613 | 5.416075  | -1.937701 |
| C | 3.590995  | -0.258905 | -3.048867 | C | -2.664406 | -2.420693 | 1.682122  |
| C | 5.469955  | 1.221241  | -2.739437 | N | -2.775897 | -3.276444 | 0.598441  |
| C | 3.743403  | -0.151868 | -4.434141 | O | -3.624655 | -1.769167 | 2.139017  |
| H | 2.784544  | -0.878113 | -2.671209 | C | -3.929494 | -3.655120 | -0.103803 |
| C | 5.618151  | 1.329435  | -4.120438 | C | -3.749304 | -4.345952 | -1.316863 |
| H | 6.149288  | 1.757769  | -2.085187 | C | -5.234089 | -3.412656 | 0.363778  |
| C | 4.755637  | 0.639087  | -4.974919 | C | -4.849444 | -4.783246 | -2.046995 |
| H | 3.064693  | -0.695081 | -5.085034 | H | -2.741693 | -4.523711 | -1.683130 |
| H | 6.411446  | 1.949349  | -4.528368 | C | -6.325258 | -3.858541 | -0.383140 |
| H | 4.874186  | 0.715981  | -6.051889 | H | -5.372577 | -2.878216 | 1.292938  |
| C | -2.521840 | 2.548340  | 2.046163  | C | -6.147499 | -4.542824 | -1.587056 |
| C | -3.176421 | 1.559654  | 2.791221  | H | -4.689843 | -5.313170 | -2.981847 |
| C | -2.074546 | 3.704794  | 2.705467  | H | -7.328506 | -3.668676 | -0.010688 |
| C | -3.368449 | 1.724957  | 4.167198  | H | -7.005583 | -4.885784 | -2.157551 |
| H | -3.537018 | 0.641801  | 2.337913  | C | -1.008797 | -1.568909 | 3.463017  |
| C | -2.259106 | 3.861259  | 4.076929  | H | -1.911674 | -1.054048 | 3.800544  |



H -0.269149 -0.795318 3.203281  
H -2.476052 0.269311 0.739281  
C -2.909448 0.625599 -1.304303  
C -4.020437 -0.221693 -1.232180  
C -2.500160 1.107026 -2.554932  
C -4.717285 -0.579358 -2.387956  
H -4.329774 -0.621585 -0.270691  
C -3.196897 0.753390 -3.709227  
H -1.631628 1.754281 -2.630960  
C -4.307769 -0.090157 -3.628221  
H -5.563312 -1.255668 -2.313726  
H -2.869332 1.131732 -4.673503  
H -4.843815 -0.371373 -4.530241  
H 3.240645 -1.518582 -0.855844  
C 3.499169 -1.280219 1.233654  
C 3.708545 -2.657777 1.361360  
C 3.466095 -0.491636 2.392258  
C 3.893863 -3.237304 2.618391  
H 3.705124 -3.283866 0.473644  
C 3.651129 -1.067276 3.647942  
H 3.300469 0.578639 2.316355  
C 3.867559 -2.443127 3.764751  
H 4.050355 -4.309044 2.698824  
H 3.626976 -0.442492 4.536253  
H 4.010924 -2.891171 4.743841  
Br 0.358849 -3.134776 -1.208178  
C -0.417265 -2.430508 4.598252  
H 0.504429 -2.926766 4.277678  
H -0.179367 -1.807329 5.466734  
H -1.126064 -3.201050 4.917215  
H -1.895818 -3.566153 0.177311  
C -1.325786 -2.362879 2.245437

H -0.535689 -2.946433 1.779885

**<sup>1</sup>TS8<sup>1c</sup>-R**

B3LYP/BSI SCF energy: -5896.186681a.u.

M06/BSII SCF energy in solution: -5894.866513a.u.

M06/BSII free energy in solution: -5893.833697a.u.

C -1.543997 2.586853 -0.504415  
N -0.788434 1.959136 0.315128  
O -1.228647 3.878542 -0.774780  
C 0.103123 4.120072 -0.185742  
C 0.152606 2.961950 0.878908  
H 1.143597 2.521884 0.931689  
C -0.291382 3.346118 2.290576  
C 0.572871 3.167211 3.375601  
C -1.571800 3.862485 2.541280  
C 0.176938 3.498181 4.673948  
H 1.556293 2.743471 3.214349  
C -1.970132 4.195863 3.833738  
H -2.264688 4.016967 1.722163  
C -1.095589 4.014800 4.908132  
H 0.864032 3.339659 5.500041  
H -2.965305 4.597794 4.002819  
H -1.407345 4.270653 5.916764  
C -3.237667 0.715324 -0.794174  
N -2.542482 -0.267612 -0.354511  
O -4.551359 0.482728 -1.015248  
C -4.893942 -0.842097 -0.506208  
C -3.450115 -1.419041 -0.135069  
H -3.434128 -1.619744 0.936550  
C -3.044644 -2.696180 -0.845870  
C -3.225313 -3.919313 -0.184994

|    |           |           |           |   |           |           |           |
|----|-----------|-----------|-----------|---|-----------|-----------|-----------|
| C  | -2.568940 | -2.703367 | -2.162564 | H | 0.371220  | -2.525373 | -0.323789 |
| C  | -2.971136 | -5.129175 | -0.832679 | H | 1.235479  | -2.735406 | -1.833351 |
| H  | -3.578540 | -3.928780 | 0.843920  | C | 1.039195  | -4.545350 | -0.639791 |
| C  | -2.308689 | -3.912134 | -2.809333 | H | 1.074117  | -4.843843 | 0.411652  |
| H  | -2.371754 | -1.767766 | -2.673093 | H | 0.079742  | -4.846836 | -1.069720 |
| C  | -2.519868 | -5.127385 | -2.153719 | H | 1.823930  | -5.118629 | -1.155159 |
| H  | -3.125345 | -6.067401 | -0.307166 | O | 3.401444  | 0.702598  | 0.515736  |
| H  | -1.940884 | -3.900741 | -3.831283 | C | 3.320619  | 1.150709  | 1.857846  |
| H  | -2.327235 | -6.065981 | -2.665906 | H | 2.914741  | 2.173879  | 1.840090  |
| C  | -2.856096 | 2.150511  | -1.129923 | H | 2.629789  | 0.536694  | 2.447748  |
| C  | -2.836417 | 2.338206  | -2.671212 | C | 4.669906  | 1.231980  | 2.582823  |
| H  | -2.605307 | 3.380430  | -2.901283 | H | 5.350568  | 1.937952  | 2.083596  |
| H  | -2.084905 | 1.693889  | -3.129298 | H | 4.525789  | 1.607204  | 3.603071  |
| H  | -3.823528 | 2.102539  | -3.077660 | H | 5.135659  | 0.246412  | 2.647097  |
| C  | -3.952305 | 3.089109  | -0.534548 | C | -5.648269 | -1.583665 | -1.613827 |
| H  | -4.912716 | 2.880334  | -1.005629 | C | -6.408905 | -2.722592 | -1.316713 |
| H  | -4.058247 | 2.948213  | 0.544678  | C | -5.585672 | -1.146782 | -2.942717 |
| H  | -3.682470 | 4.127567  | -0.730903 | C | -7.080352 | -3.412885 | -2.324623 |
| Ni | -0.444561 | -0.269600 | 0.115764  | H | -6.488966 | -3.070094 | -0.292472 |
| Br | -0.099706 | -0.039253 | -2.512301 | C | -6.265641 | -1.833586 | -3.950165 |
| Si | 2.981529  | -0.971316 | 0.037425  | H | -5.010159 | -0.263411 | -3.190999 |
| H  | 1.423851  | -0.567384 | 0.282900  | C | -7.013596 | -2.970383 | -3.646705 |
| O  | 4.234221  | -1.484503 | 1.094592  | H | -7.663231 | -4.294098 | -2.072528 |
| O  | 2.430102  | -2.650706 | -0.132136 | H | -6.207664 | -1.474923 | -4.973897 |
| C  | 4.658488  | -2.803253 | 1.398981  | H | -7.542439 | -3.504652 | -4.430618 |
| H  | 5.115248  | -3.261849 | 0.508751  | C | -5.792047 | -0.631416 | 0.721403  |
| H  | 3.811606  | -3.420396 | 1.709496  | C | -6.683997 | 0.450841  | 0.738243  |
| C  | 5.703211  | -2.750369 | 2.508818  | C | -5.802915 | -1.520155 | 1.803657  |
| H  | 6.039217  | -3.760777 | 2.767737  | C | -7.545379 | 0.649154  | 1.815744  |
| H  | 6.583399  | -2.173263 | 2.198606  | H | -6.699549 | 1.140240  | -0.098086 |
| H  | 5.286299  | -2.289034 | 3.409076  | C | -6.672251 | -1.327063 | 2.880364  |
| C  | 1.242513  | -3.035680 | -0.773050 | H | -5.137309 | -2.376936 | 1.821481  |

C -7.543305 -0.239278 2.893043  
H -8.222363 1.498691 1.811454  
H -6.659214 -2.027530 3.710165  
H -8.214209 -0.084752 3.732848  
C 0.143073 5.535001 0.381310  
C 1.317943 5.977521 1.006013  
C -0.936248 6.416945 0.271313  
C 1.403627 7.267306 1.524173  
H 2.172101 5.310791 1.081182  
C -0.846341 7.713656 0.784576  
H -1.846851 6.090916 -0.217345  
C 0.320138 8.142843 1.414881  
H 2.319669 7.590770 2.010023  
H -1.693873 8.386726 0.688988  
H 0.388538 9.150351 1.814709  
C 1.127508 4.014641 -1.330440  
C 0.909392 4.824214 -2.459190  
C 2.277247 3.218867 -1.287713  
C 1.817976 4.847055 -3.512897  
H 0.023320 5.449836 -2.502458  
C 3.206414 3.256793 -2.338470  
H 2.484338 2.529717 -0.475601  
C 2.980120 4.069227 -3.450730  
H 1.630371 5.485155 -4.372319  
H 4.085086 2.614560 -2.294089  
H 3.707920 4.105464 -4.258099  
O 4.244044 -1.601266 -3.767494  
P 4.827558 -0.891425 -2.532230  
O 5.787731 -1.757376 -1.691875  
O 5.256011 0.571586 -2.726197  
O 3.428820 -0.746295 -1.557410  
K 2.646490 0.566435 -3.902205

K 6.095029 0.356672 -0.137623  
K 4.101305 -3.729930 -2.153267  
C 0.304587 -1.549013 2.748076  
N 0.438416 -2.935645 2.743546  
C 1.320938 -3.755434 3.461338  
C 2.323991 -3.261712 4.314888  
C 1.164803 -5.148683 3.331633  
C 3.145421 -4.156417 5.001270  
H 2.435070 -2.192759 4.423983  
C 1.996275 -6.027313 4.020753  
H 0.378576 -5.540725 2.689812  
C 2.997912 -5.537668 4.861714  
H 3.914229 -3.759446 5.659009  
H 1.854139 -7.098280 3.903082  
H 3.645721 -6.220451 5.403237  
C -1.665832 -0.033091 2.802441  
H -2.424104 0.449102 2.177567  
H -0.993539 0.759287 3.138656  
C -0.859552 -1.036375 1.963296  
O 1.067327 -0.829446 3.398589  
H -0.236769 -3.430346 2.179623  
H -1.500014 -1.888035 1.690320  
C -2.349043 -0.656345 4.031950  
H -1.610743 -1.070248 4.726711  
H -2.935784 0.092113 4.577010  
H -3.032290 -1.466767 3.746700

<sup>1</sup>TS8<sup>1c</sup>-S

B3LYP/BSI SCF energy: -5896.201179a.u.

M06/BSII SCF energy in solution: -5894.880736a.u.

M06/BSII free energy in solution: -5893.845776a.u.

|   |           |           |           |    |           |           |           |
|---|-----------|-----------|-----------|----|-----------|-----------|-----------|
| C | -0.322871 | -2.974865 | -0.507803 | H  | 3.348899  | 1.264973  | -4.669380 |
| N | -0.638352 | -2.196704 | 0.449043  | H  | 4.556033  | 3.324524  | -3.965137 |
| O | -1.304238 | -3.741990 | -1.056948 | C  | 1.058255  | -3.318706 | -1.036867 |
| C | -2.570983 | -3.391792 | -0.414076 | C  | 1.028443  | -3.534715 | -2.574848 |
| C | -2.070705 | -2.382175 | 0.728633  | H  | 0.327246  | -4.335662 | -2.815644 |
| H | -2.560783 | -1.414138 | 0.595951  | H  | 0.716310  | -2.620630 | -3.082961 |
| C | -2.320790 | -2.845585 | 2.159392  | H  | 2.022519  | -3.826457 | -2.920973 |
| C | -3.602087 | -2.720115 | 2.713956  | C  | 1.453160  | -4.661295 | -0.349266 |
| C | -1.309969 | -3.415435 | 2.941474  | H  | 2.408442  | -5.015607 | -0.737116 |
| C | -3.868593 | -3.154122 | 4.011957  | H  | 1.542506  | -4.541531 | 0.734051  |
| H | -4.403907 | -2.285631 | 2.122569  | H  | 0.689634  | -5.412079 | -0.563163 |
| C | -1.570792 | -3.843412 | 4.244994  | Ni | 0.547972  | 0.187378  | 0.053222  |
| H | -0.310950 | -3.508518 | 2.531050  | Br | -0.255655 | -0.067667 | -2.414703 |
| C | -2.850458 | -3.716528 | 4.784939  | Si | -1.828733 | 2.489905  | 0.445488  |
| H | -4.870395 | -3.051695 | 4.420009  | H  | -0.680152 | 1.329824  | 0.262803  |
| H | -0.769723 | -4.275866 | 4.837955  | O  | -2.353863 | 3.587808  | 1.664216  |
| H | -3.053914 | -4.050843 | 5.798209  | O  | -0.543308 | 3.615316  | -0.028745 |
| C | 2.139356  | -2.289160 | -0.732480 | C  | -2.147806 | 4.986302  | 1.774004  |
| N | 2.092200  | -1.063202 | -0.353886 | H  | -2.772723 | 5.500053  | 1.027569  |
| O | 3.372074  | -2.792711 | -0.968888 | H  | -1.101185 | 5.243017  | 1.582559  |
| C | 4.364103  | -1.842404 | -0.451706 | C  | -2.547489 | 5.446138  | 3.172072  |
| C | 3.487481  | -0.535357 | -0.320048 | H  | -2.396445 | 6.525946  | 3.282146  |
| H | 3.636529  | -0.084375 | 0.657328  | H  | -3.604994 | 5.234323  | 3.370879  |
| C | 3.729904  | 0.546141  | -1.361814 | H  | -1.950684 | 4.934179  | 3.933461  |
| C | 4.389986  | 1.718275  | -0.967878 | C  | 0.317563  | 3.325858  | -1.124757 |
| C | 3.354140  | 0.398439  | -2.703183 | H  | 0.996867  | 2.499285  | -0.871761 |
| C | 4.687010  | 2.715284  | -1.899287 | H  | -0.264197 | 2.972614  | -1.987566 |
| H | 4.655261  | 1.853508  | 0.076207  | C  | 1.158504  | 4.543023  | -1.501331 |
| C | 3.648790  | 1.394419  | -3.633366 | H  | 1.745199  | 4.899530  | -0.651877 |
| H | 2.808859  | -0.482019 | -3.022740 | H  | 1.849148  | 4.275378  | -2.306766 |
| C | 4.321890  | 2.552875  | -3.236534 | H  | 0.550649  | 5.389560  | -1.855077 |
| H | 5.197965  | 3.617639  | -1.575472 | O  | -2.734870 | 1.252180  | 1.314342  |

|   |           |           |           |   |           |           |           |
|---|-----------|-----------|-----------|---|-----------|-----------|-----------|
| C | -2.411990 | 0.888665  | 2.650585  | C | -5.139897 | -6.070349 | 0.611983  |
| H | -1.877879 | -0.069882 | 2.653288  | H | -5.248611 | -4.090857 | -0.201864 |
| H | -1.757132 | 1.633993  | 3.119952  | C | -2.929939 | -6.945716 | 0.987779  |
| C | -3.670850 | 0.758571  | 3.508859  | H | -1.301849 | -5.645143 | 0.487608  |
| H | -4.417296 | 0.128707  | 3.011511  | C | -4.314810 | -7.110293 | 1.037360  |
| H | -3.439135 | 0.289122  | 4.470489  | H | -6.219997 | -6.183128 | 0.640281  |
| H | -4.111660 | 1.740137  | 3.726540  | H | -2.273063 | -7.746981 | 1.314447  |
| C | 5.523439  | -1.769123 | -1.442336 | H | -4.744521 | -8.039171 | 1.401043  |
| C | 6.681618  | -1.061948 | -1.090130 | C | -3.471563 | -2.737447 | -1.466901 |
| C | 5.469416  | -2.396402 | -2.691042 | C | -3.421597 | -3.194383 | -2.793033 |
| C | 7.754559  | -0.972456 | -1.974068 | C | -4.430163 | -1.772377 | -1.130451 |
| H | 6.747786  | -0.585843 | -0.116762 | C | -4.313314 | -2.708824 | -3.749928 |
| C | 6.550391  | -2.314992 | -3.572322 | H | -2.679085 | -3.933767 | -3.070597 |
| H | 4.584193  | -2.953425 | -2.973605 | C | -5.336158 | -1.290487 | -2.082985 |
| C | 7.694369  | -1.600943 | -3.220136 | H | -4.481864 | -1.370870 | -0.124269 |
| H | 8.641652  | -0.415940 | -1.685577 | C | -5.283865 | -1.763568 | -3.396730 |
| H | 6.492828  | -2.812412 | -4.536539 | H | -4.257554 | -3.077756 | -4.770483 |
| H | 8.533653  | -1.536574 | -3.906622 | H | -6.036441 | -0.509918 | -1.802196 |
| C | 4.863682  | -2.420536 | 0.884788  | H | -5.988227 | -1.395634 | -4.138173 |
| C | 5.214801  | -3.781025 | 0.912341  | O | -3.826604 | 3.417977  | -2.990076 |
| C | 5.041802  | -1.656674 | 2.044181  | P | -4.217625 | 3.152053  | -1.528218 |
| C | 5.715502  | -4.367542 | 2.070917  | O | -4.400227 | 4.415416  | -0.663715 |
| H | 5.097069  | -4.378570 | 0.014050  | O | -5.210280 | 2.016816  | -1.264419 |
| C | 5.553470  | -2.248718 | 3.205250  | O | -2.714359 | 2.505913  | -0.955868 |
| H | 4.768299  | -0.607913 | 2.081975  | K | -3.213993 | 0.775281  | -3.055630 |
| C | 5.889182  | -3.599739 | 3.226137  | K | -5.100840 | 2.767141  | 1.315443  |
| H | 5.977409  | -5.422026 | 2.070840  | K | -2.205717 | 5.271221  | -1.918663 |
| H | 5.677904  | -1.640317 | 4.096362  | C | 2.279752  | 1.632796  | 2.030639  |
| H | 6.283191  | -4.053535 | 4.131118  | N | 1.942563  | 2.971011  | 1.889886  |
| C | -3.197927 | -4.702770 | 0.083909  | C | 2.743914  | 4.106299  | 2.104250  |
| C | -4.586928 | -4.879922 | 0.136700  | C | 4.103638  | 4.059390  | 2.465506  |
| C | -2.378676 | -5.754293 | 0.518643  | C | 2.124857  | 5.365325  | 1.975853  |

C 4.805368 5.246659 2.677539  
 H 4.582822 3.099459 2.583896  
 C 2.841086 6.539865 2.188341  
 H 1.073395 5.410329 1.708761  
 C 4.191674 6.492077 2.539599  
 H 5.854060 5.189024 2.957745  
 H 2.336199 7.496890 2.084301  
 H 4.751763 7.407105 2.707364  
 C 1.408242 -0.604953 2.774923  
 H 2.333577 -1.081724 2.441076  
 H 0.603385 -1.316542 2.576734  
 C 1.147977 0.663019 1.953947  
 O 3.457810 1.291720 2.238138  
 H 0.992928 3.166862 1.585977  
 H 0.251078 1.155762 2.334116  
 C 1.501984 -0.352134 4.289580  
 H 0.579889 0.101088 4.673549  
 H 1.661711 -1.288990 4.836744

**<sup>4</sup>IM6<sup>1c-S</sup>**

B3LYP/BSI SCF energy: -2923.386146a.u.

M06/BSII SCF energy in solution: -2922.065426a.u.

M06/BSII free energy in solution: -2921.076505a.u.

C -0.524187 -2.097389 -0.846351  
 N -0.966271 -0.900744 -0.721641  
 O -1.326199 -3.108532 -0.465980  
 C -2.668432 -2.516161 -0.248704  
 C -2.290393 -0.997895 -0.049472  
 C 1.881473 -1.624075 -0.712312  
 N 1.800056 -0.369548 -0.446028  
 O 3.036964 -2.250625 -0.397123

C 3.768790 -1.337754 0.494193  
 C 3.142141 0.039265 0.046445  
 Ni 0.108643 0.861375 -0.861566  
 C 0.834754 -2.493356 -1.392401  
 C 1.114308 -3.990031 -1.146649  
 H 0.341079 -4.589156 -1.629593  
 H 1.119980 -4.232765 -0.081893  
 H 2.085452 -4.259193 -1.565369  
 C 0.859778 -2.206559 -2.920465  
 H 1.837305 -2.476352 -3.332061  
 H 0.656420 -1.154568 -3.124516  
 H 0.097961 -2.813023 -3.418328  
 C 5.261560 -1.517505 0.242013  
 C 6.194525 -1.111077 1.205323  
 C 5.728807 -2.066874 -0.958689  
 C 7.562991 -1.239119 0.968033  
 H 5.854528 -0.704259 2.151965  
 C 7.097656 -2.204134 -1.190138  
 H 5.019760 -2.393634 -1.709468  
 C 8.020511 -1.787958 -0.230402  
 H 8.270411 -0.917426 1.726870  
 H 7.441015 -2.637732 -2.125019  
 H 9.085909 -1.894638 -0.412361  
 C 3.387156 -1.731525 1.931340  
 C 3.259985 -0.798339 2.967138  
 C 3.218177 -3.092053 2.233833  
 C 2.956858 -1.211348 4.268255  
 H 3.397532 0.261682 2.781366  
 C 2.909082 -3.503630 3.528637  
 H 3.330189 -3.828104 1.445355  
 C 2.774921 -2.563429 4.553103  
 H 2.861775 -0.468634 5.054939

|   |           |           |           |   |           |           |           |
|---|-----------|-----------|-----------|---|-----------|-----------|-----------|
| H | 2.778102  | -4.561270 | 3.738741  | H | -2.709672 | 5.091193  | 1.054630  |
| H | 2.535513  | -2.883181 | 5.562916  | C | -6.228217 | 3.586991  | 0.524634  |
| C | -3.449765 | -2.830313 | -1.535144 | H | -5.279801 | 2.245914  | -0.883904 |
| C | -3.892677 | -1.859784 | -2.441332 | C | -6.064007 | 4.644134  | 1.420574  |
| C | -3.687944 | -4.185866 | -1.825279 | H | -4.634036 | 6.007755  | 2.291141  |
| C | -4.564932 | -2.244936 | -3.608198 | H | -7.215674 | 3.161039  | 0.365996  |
| H | -3.730932 | -0.800765 | -2.269909 | H | -6.913794 | 5.044969  | 1.964966  |
| C | -4.349408 | -4.563589 | -2.989512 | C | -1.173850 | 1.112038  | -3.382913 |
| H | -3.353705 | -4.946674 | -1.126370 | H | -1.639054 | 0.128282  | -3.264223 |
| C | -4.794645 | -3.589150 | -3.888195 | H | -0.133402 | 0.935733  | -3.686763 |
| H | -4.905186 | -1.476925 | -4.296855 | C | 1.122954  | 2.464901  | -0.448962 |
| H | -4.523919 | -5.616505 | -3.193000 | H | 1.703015  | 2.126908  | 0.424354  |
| H | -5.317388 | -3.879652 | -4.795257 | H | 1.842263  | 2.621142  | -1.265444 |
| C | -3.310313 | -3.184398 | 0.957595  | C | 0.519938  | 3.817643  | -0.056006 |
| C | -2.604639 | -4.054848 | 1.793704  | H | -0.230307 | 3.681985  | 0.738152  |
| C | -4.656356 | -2.912557 | 1.240983  | H | 0.006412  | 4.281746  | -0.911597 |
| C | -3.233093 | -4.641977 | 2.894917  | C | 1.564239  | 4.830891  | 0.451056  |
| H | -1.566208 | -4.278438 | 1.579252  | H | 2.337338  | 4.961970  | -0.319435 |
| C | -5.278398 | -3.490008 | 2.345566  | H | 2.077695  | 4.407035  | 1.326443  |
| H | -5.220256 | -2.252657 | 0.588302  | C | 0.977384  | 6.198838  | 0.822949  |
| C | -4.568803 | -4.360078 | 3.176995  | H | 0.470765  | 6.628359  | -0.053730 |
| H | -2.672764 | -5.320829 | 3.531813  | H | 0.197958  | 6.065183  | 1.588080  |
| H | -6.320530 | -3.265022 | 2.553227  | C | 2.019630  | 7.198915  | 1.340228  |
| H | -5.055786 | -4.815604 | 4.034394  | H | 2.800785  | 7.331594  | 0.578974  |
| C | -1.171875 | 1.858457  | -2.037984 | H | 2.523215  | 6.772688  | 2.218907  |
| C | -2.544576 | 2.041768  | -1.491553 | C | 1.425415  | 8.563436  | 1.704260  |
| N | -2.718173 | 3.148347  | -0.674614 | H | 0.943725  | 9.029472  | 0.836930  |
| O | -3.499463 | 1.281189  | -1.733884 | H | 2.194561  | 9.253545  | 2.067345  |
| C | -3.861662 | 3.596861  | 0.002735  | H | 0.666602  | 8.468870  | 2.489715  |
| C | -3.699360 | 4.666143  | 0.904429  | H | -2.995139 | -0.359692 | -0.575781 |
| C | -5.148888 | 3.059952  | -0.186078 | C | -2.198181 | -0.497535 | 1.384952  |
| C | -4.787403 | 5.181697  | 1.601875  | C | -3.178503 | 0.381443  | 1.860193  |





|   |           |           |           |   |           |           |           |
|---|-----------|-----------|-----------|---|-----------|-----------|-----------|
| C | 3.441017  | -2.354060 | 1.122765  | H | -2.708313 | -3.885695 | 5.365186  |
| C | 3.805849  | -1.644387 | 2.274186  | C | -0.896291 | 2.392648  | -1.763092 |
| C | 3.056659  | -3.696599 | 1.262648  | N | -2.289761 | 2.621722  | -1.544509 |
| C | 3.770824  | -2.252205 | 3.532278  | O | -0.502617 | 1.827719  | -2.825745 |
| H | 4.130288  | -0.610726 | 2.207844  | C | -3.383247 | 2.282464  | -2.328576 |
| C | 3.016392  | -4.301971 | 2.517517  | C | -4.670241 | 2.627431  | -1.853012 |
| H | 2.786836  | -4.264497 | 0.379421  | C | -3.287066 | 1.635637  | -3.580965 |
| C | 3.370985  | -3.581158 | 3.659883  | C | -5.810596 | 2.345058  | -2.597394 |
| H | 4.055396  | -1.679870 | 4.410479  | H | -4.762640 | 3.140066  | -0.897611 |
| H | 2.712217  | -5.341569 | 2.601555  | C | -4.442715 | 1.366505  | -4.313767 |
| H | 3.339779  | -4.052382 | 4.637890  | H | -2.305703 | 1.381443  | -3.954732 |
| C | -4.403389 | -2.131632 | -0.360026 | C | -5.711499 | 1.711644  | -3.839439 |
| C | -4.742128 | -1.458032 | -1.544887 | H | -6.783523 | 2.629414  | -2.204937 |
| C | -5.256189 | -3.152419 | 0.085765  | H | -4.342600 | 0.880447  | -5.281400 |
| C | -5.911725 | -1.769748 | -2.237602 | H | -6.600507 | 1.502745  | -4.426920 |
| H | -4.099645 | -0.687523 | -1.958100 | C | 1.077723  | 3.974218  | -1.697813 |
| C | -6.426367 | -3.465085 | -0.607682 | H | 1.674339  | 3.243022  | -2.248696 |
| H | -5.009133 | -3.711557 | 0.980062  | H | 1.757402  | 4.496476  | -1.013537 |
| C | -6.763278 | -2.770519 | -1.768705 | C | 1.041754  | 2.570968  | 0.614145  |
| H | -6.149836 | -1.216973 | -3.140651 | H | 0.959474  | 1.602700  | 1.165359  |
| H | -7.071491 | -4.256536 | -0.236591 | H | 2.062828  | 2.661657  | 0.234356  |
| H | -7.676581 | -3.009917 | -2.306090 | C | 0.747565  | 3.658589  | 1.651723  |
| C | -2.972339 | -2.443121 | 1.747764  | H | -0.294971 | 3.569625  | 1.984698  |
| C | -1.930272 | -3.307801 | 2.098626  | H | 0.853079  | 4.656972  | 1.204925  |
| C | -3.923974 | -2.111392 | 2.726108  | C | 1.669563  | 3.574230  | 2.878833  |
| C | -1.833676 | -3.822136 | 3.394764  | H | 2.717394  | 3.634421  | 2.550350  |
| H | -1.195219 | -3.589980 | 1.355334  | H | 1.553392  | 2.588583  | 3.352214  |
| C | -3.830797 | -2.627621 | 4.016396  | C | 1.400797  | 4.669656  | 3.918969  |
| H | -4.740516 | -1.441962 | 2.477429  | H | 1.514076  | 5.655568  | 3.445706  |
| C | -2.781794 | -3.485017 | 4.358240  | H | 0.352616  | 4.609609  | 4.245589  |
| H | -1.013107 | -4.488999 | 3.643948  | C | 2.317674  | 4.591538  | 5.146470  |
| H | -4.577796 | -2.356233 | 4.756745  | H | 3.364902  | 4.650036  | 4.819257  |

H 2.203810 3.606897 5.620989  
C 2.043490 5.690033 6.178721  
H 2.183506 6.686013 5.743173  
H 2.713047 5.607477 7.041376  
H 1.013815 5.636146 6.550810  
H -3.265784 0.214910 -0.425798  
C -2.681485 0.494567 1.574328  
C -3.779094 1.333730 1.802715  
C -1.672539 0.422114 2.543936  
C -3.875111 2.081727 2.979396  
H -4.563377 1.400189 1.052338  
C -1.765251 1.169072 3.717616  
H -0.816428 -0.222914 2.377855  
C -2.866496 2.001050 3.939855  
H -4.733888 2.727323 3.140925  
H -0.976783 1.101114 4.461879  
H -2.935614 2.582422 4.854969  
H 3.150221 0.208041 0.688868  
C 3.787503 0.695027 -1.277737  
C 4.964758 1.326702 -0.854770  
C 3.333646 0.917138 -2.582939  
C 5.686792 2.146192 -1.721373  
H 5.322988 1.173146 0.160520  
C 4.054801 1.739585 -3.451383  
H 2.396553 0.480975 -2.909978  
C 5.233936 2.352307 -3.026203  
H 6.597965 2.626889 -1.376650  
H 3.684212 1.909005 -4.458255  
H 5.791439 2.994091 -3.702428  
H -2.513727 3.050272 -0.657807  
C -0.000148 3.230943 -0.903675  
H -0.603738 3.923413 -0.316535

C 0.474987 4.988916 -2.679875  
H -0.152244 4.486245 -3.420923  
H -0.138861 5.734466 -2.159841  
H 1.265798 5.526896 -3.214429

**<sup>1</sup>TS10<sup>1c</sup>-R**

B3LYP/BSI SCF energy: -2923.32119a.u.

M06/BSII SCF energy in solution: -2922.016993a.u.

M06/BSII free energy in solution: -2921.028496a.u.

C 0.559248 -0.433225 -1.649936  
N 1.111193 -0.042317 -0.560043  
O 1.186362 -1.415539 -2.351495  
C 2.217852 -1.972186 -1.475439  
C 2.378584 -0.786299 -0.421516  
C -1.833477 -0.045324 -1.191516  
N -1.707650 0.142266 0.068754  
O -3.060829 -0.334740 -1.670960  
C -4.019947 -0.224319 -0.553401  
C -3.028245 -0.061205 0.693253  
Ni -0.021594 0.780908 1.072689  
C -0.739064 0.089594 -2.243988  
C -1.116419 -0.687472 -3.521747  
H -0.324830 -0.582823 -4.266654  
H -1.259587 -1.752343 -3.325303  
H -2.043074 -0.285379 -3.933280  
C -0.590025 1.599281 -2.579797  
H -1.517353 1.965300 -3.029607  
H -0.387185 2.185165 -1.684448  
H 0.222022 1.742195 -3.299348  
C -4.837664 1.044990 -0.837196  
C -6.084817 0.969049 -1.475068

|   |           |           |           |   |           |           |           |
|---|-----------|-----------|-----------|---|-----------|-----------|-----------|
| C | -4.302349 | 2.313979  | -0.558223 | C | 0.690644  | -3.999124 | -1.549399 |
| C | -6.793921 | 2.125806  | -1.800691 | C | 2.037600  | -3.700478 | 0.423441  |
| H | -6.509229 | 0.001740  | -1.718374 | C | 0.167459  | -5.176328 | -1.015462 |
| C | -5.015017 | 3.468295  | -0.887029 | H | 0.375217  | -3.663196 | -2.530586 |
| H | -3.326250 | 2.431812  | -0.095907 | C | 1.520899  | -4.884366 | 0.956033  |
| C | -6.263820 | 3.381380  | -1.503273 | H | 2.770972  | -3.148570 | 1.003197  |
| H | -7.761213 | 2.041431  | -2.288267 | C | 0.580575  | -5.625150 | 0.240941  |
| H | -4.583343 | 4.437948  | -0.656205 | H | -0.560230 | -5.746664 | -1.585660 |
| H | -6.816817 | 4.282707  | -1.752978 | H | 1.855042  | -5.221981 | 1.932791  |
| C | -4.866987 | -1.488962 | -0.527057 | H | 0.177699  | -6.544979 | 0.654814  |
| C | -5.891504 | -1.613869 | 0.424270  | C | -0.112173 | 2.258462  | 2.509763  |
| C | -4.657213 | -2.538439 | -1.427262 | C | -0.288276 | 2.876392  | 1.121071  |
| C | -6.676279 | -2.763103 | 0.479534  | N | 0.890099  | 3.476660  | 0.614811  |
| H | -6.079391 | -0.804560 | 1.122895  | O | -1.403058 | 3.176428  | 0.635369  |
| C | -5.447156 | -3.690266 | -1.373644 | C | 1.051177  | 4.409043  | -0.412416 |
| H | -3.880188 | -2.450065 | -2.176859 | C | 2.367854  | 4.795086  | -0.741767 |
| C | -6.456738 | -3.809094 | -0.420473 | C | -0.017362 | 5.005591  | -1.112305 |
| H | -7.461404 | -2.840994 | 1.226144  | C | 2.609710  | 5.735451  | -1.738476 |
| H | -5.270634 | -4.493173 | -2.084095 | H | 3.202210  | 4.351047  | -0.204480 |
| H | -7.070093 | -4.704593 | -0.378790 | C | 0.245652  | 5.944355  | -2.109629 |
| C | 3.439280  | -2.285342 | -2.337599 | H | -1.028299 | 4.721705  | -0.859137 |
| C | 4.349789  | -3.284597 | -1.969385 | C | 1.549975  | 6.318818  | -2.437299 |
| C | 3.685401  | -1.553765 | -3.508029 | H | 3.635074  | 6.016999  | -1.965113 |
| C | 5.482446  | -3.538375 | -2.744068 | H | -0.593112 | 6.392163  | -2.636844 |
| H | 4.172450  | -3.881292 | -1.081407 | H | 1.737710  | 7.052331  | -3.215529 |
| C | 4.813238  | -1.813509 | -4.285695 | C | -1.400602 | 2.301859  | 3.338850  |
| H | 2.985862  | -0.785611 | -3.814954 | H | -2.230713 | 1.945954  | 2.726074  |
| C | 5.719117  | -2.805001 | -3.906375 | H | -1.314168 | 1.617315  | 4.191260  |
| H | 6.174291  | -4.318784 | -2.440074 | C | 0.896699  | 0.747494  | 2.842748  |
| H | 4.981848  | -1.238296 | -5.191638 | H | 0.745474  | -0.262318 | 2.355192  |
| H | 6.597032  | -3.006770 | -4.513222 | H | 0.461370  | 0.611478  | 3.837317  |
| C | 1.626581  | -3.237681 | -0.833725 | C | 2.393231  | 1.049354  | 2.998068  |

H 2.864720 1.184751 2.017117  
H 2.519382 1.997329 3.541636  
C 3.151262 -0.044641 3.769289  
H 2.649853 -0.219160 4.732035  
H 3.083749 -0.994161 3.218677  
C 4.626711 0.294858 4.018827  
H 4.689245 1.228078 4.596809  
H 5.119569 0.498968 3.058045  
C 5.393901 -0.807730 4.760376  
H 4.898464 -1.010971 5.719559  
H 5.331775 -1.742008 4.184910  
C 6.864943 -0.458923 5.009013  
H 6.958947 0.457648 5.602540  
H 7.382270 -1.258768 5.549198  
H 7.398572 -0.295096 4.065644  
C -2.985595 -1.185676 1.712867  
C -3.608936 -1.016096 2.954685  
C -2.324642 -2.392992 1.451284  
C -3.586111 -2.031859 3.912394  
H -4.111388 -0.077834 3.177286  
C -2.296838 -3.408115 2.406527  
H -1.820776 -2.539617 0.501231  
C -2.929098 -3.232014 3.639970  
H -4.074074 -1.880777 4.871273  
H -1.773997 -4.334154 2.185846  
H -2.905297 -4.022929 4.384431  
H -3.296497 0.853930 1.222669  
H 2.413857 -1.208275 0.583509  
C 3.599420 0.102683 -0.596110  
C 4.819006 -0.295084 -0.029653  
C 3.553844 1.298872 -1.320311  
C 5.970844 0.472295 -0.198264

H 4.870002 -1.217609 0.543327  
C 4.706382 2.070767 -1.488545  
H 2.612005 1.641967 -1.734063  
C 5.917944 1.659314 -0.932721  
H 6.907147 0.144888 0.244664  
H 4.647336 2.997860 -2.050848  
H 6.813176 2.260090 -1.065038  
H 1.751777 3.132336 1.014223  
H 0.648759 2.864199 3.014503  
C -1.725968 3.714393 3.846309  
H -0.907490 4.119073 4.454106  
H -1.896314 4.392017 3.005110  
H -2.628756 3.711323 4.467253

**<sup>1</sup>TS12<sup>1c</sup>-R**

B3LYP/BSI SCF energy: -2923.343703a.u.

M06/BSII SCF energy in solution: -2922.020693a.u.

M06/BSII free energy in solution: -2921.036404a.u.

C -1.508546 -1.916708 0.693977  
N -1.587174 -0.929012 -0.115542  
O -2.581371 -2.157308 1.484617  
C -3.680865 -1.325441 0.966650  
C -2.867358 -0.245271 0.132976  
H -3.350363 -0.072777 -0.827309  
C -2.657035 1.107738 0.797414  
C -3.591324 2.129252 0.578717  
C -1.559581 1.366861 1.626822  
C -3.444728 3.374950 1.188455  
H -4.440976 1.949826 -0.074575  
C -1.406092 2.614897 2.234069  
H -0.807010 0.602027 1.784412

|    |           |           |           |   |           |           |          |
|----|-----------|-----------|-----------|---|-----------|-----------|----------|
| C  | -2.350859 | 3.620759  | 2.021339  | C | 2.654114  | -0.999631 | 3.435288 |
| H  | -4.181750 | 4.152684  | 1.009564  | C | 3.155641  | 0.855828  | 1.976758 |
| H  | -0.541576 | 2.799135  | 2.865002  | C | 2.566100  | -0.131670 | 4.520817 |
| H  | -2.235802 | 4.589420  | 2.499967  | H | 2.503129  | -2.063484 | 3.582444 |
| C  | 0.949263  | -2.182932 | 0.505458  | C | 3.072541  | 1.725554  | 3.070511 |
| N  | 1.146314  | -1.304398 | -0.408750 | H | 3.394611  | 1.277222  | 1.004713 |
| O  | 2.017463  | -2.549568 | 1.248991  | C | 2.773358  | 1.238193  | 4.341196 |
| C  | 3.060303  | -1.538143 | 1.002607  | H | 2.341866  | -0.526675 | 5.507919 |
| C  | 2.591469  | -0.972380 | -0.402951 | H | 3.242899  | 2.785931  | 2.915333 |
| H  | 2.699843  | 0.110872  | -0.424811 | H | 2.708040  | 1.917840  | 5.186174 |
| C  | 3.315239  | -1.531179 | -1.617660 | C | 4.416476  | -2.233447 | 1.025193 |
| C  | 4.379489  | -0.798975 | -2.160889 | C | 5.586451  | -1.476695 | 1.175921 |
| C  | 2.974445  | -2.759864 | -2.195392 | C | 4.525370  | -3.621155 | 0.876977 |
| C  | 5.097700  | -1.293131 | -3.250432 | C | 6.836766  | -2.093504 | 1.168043 |
| H  | 4.623378  | 0.173189  | -1.742113 | H | 5.521931  | -0.401876 | 1.310366 |
| C  | 3.688737  | -3.251445 | -3.288957 | C | 5.777290  | -4.238335 | 0.880213 |
| H  | 2.137655  | -3.329303 | -1.804534 | H | 3.628854  | -4.219403 | 0.767249 |
| C  | 4.755355  | -2.522035 | -3.816967 | C | 6.937745  | -3.477989 | 1.022370 |
| H  | 5.917698  | -0.711567 | -3.662232 | H | 7.732200  | -1.489624 | 1.283718 |
| H  | 3.407984  | -4.203440 | -3.730839 | H | 5.842164  | -5.317238 | 0.770396 |
| H  | 5.309572  | -2.904857 | -4.669269 | H | 7.911524  | -3.959183 | 1.023378 |
| Ni | -0.289942 | -0.677534 | -1.724758 | C | -4.473511 | -0.791779 | 2.155550 |
| C  | -0.357263 | -2.900228 | 0.814583  | C | -5.778363 | -0.314212 | 1.972830 |
| C  | -0.581258 | -4.018968 | -0.245698 | C | -3.911861 | -0.743424 | 3.437142 |
| H  | -1.536212 | -4.518619 | -0.059853 | C | -6.500510 | 0.209405  | 3.044618 |
| H  | -0.594435 | -3.594713 | -1.253142 | H | -6.240662 | -0.364119 | 0.992264 |
| H  | 0.219392  | -4.761579 | -0.175256 | C | -4.639681 | -0.228681 | 4.510970 |
| C  | -0.319523 | -3.518575 | 2.228082  | H | -2.907415 | -1.117187 | 3.595355 |
| H  | 0.487896  | -4.250023 | 2.289777  | C | -5.934827 | 0.252450  | 4.319727 |
| H  | -0.148508 | -2.759253 | 2.995261  | H | -7.510562 | 0.574650  | 2.882416 |
| H  | -1.266496 | -4.017437 | 2.438280  | H | -4.189823 | -0.205873 | 5.499521 |
| C  | 2.937537  | -0.517067 | 2.146408  | H | -6.500076 | 0.652480  | 5.156455 |

C -4.542830 -2.247913 0.089273  
C -4.766752 -3.564388 0.523763  
C -5.164509 -1.821219 -1.089996  
C -5.570709 -4.432808 -0.211014  
H -4.303519 -3.904925 1.443493  
C -5.976555 -2.690849 -1.824437  
H -5.028648 -0.809723 -1.457436  
C -6.179293 -3.999223 -1.391368  
H -5.725824 -5.448660 0.141268  
H -6.442674 -2.339179 -2.740082  
H -6.805732 -4.675394 -1.965638  
C 1.489756 2.468715 -2.548538  
C 2.298889 2.878947 -1.421967  
N 1.666730 3.777943 -0.564224  
O 3.464865 2.486797 -1.229003  
C 2.204196 4.500119 0.509864  
C 1.307255 5.197185 1.340842  
C 3.585130 4.592512 0.763965  
C 1.776575 5.965556 2.401916  
H 0.239026 5.123725 1.152454  
C 4.037526 5.368855 1.831551  
H 4.275760 4.055441 0.129625  
C 3.147020 6.056995 2.658068  
H 1.066539 6.495634 3.030737  
H 5.106685 5.434700 2.014196  
H 3.513488 6.656876 3.485462  
C 2.029198 1.667380 -3.681915  
H 2.991416 1.236942 -3.398018  
H 1.325910 0.845881 -3.855243  
C -0.996629 -0.551045 -3.579971  
H -1.746472 -1.358790 -3.656180  
H -0.162850 -0.893112 -4.222154

C -1.595940 0.713820 -4.220370  
H -0.829866 1.499237 -4.304468  
H -1.917571 0.517363 -5.259336  
C -2.796543 1.305807 -3.470772  
H -3.564617 0.524453 -3.353171  
H -2.479062 1.582119 -2.455293  
C -3.425449 2.522824 -4.161713  
H -3.746261 2.241120 -5.175081  
H -2.657560 3.299312 -4.296510  
C -4.617280 3.125159 -3.406013  
H -5.387512 2.351940 -3.271057  
H -4.295200 3.412433 -2.395230  
C -5.235437 4.338540 -4.108471  
H -5.597376 4.073953 -5.108656  
H -6.082701 4.744451 -3.545020  
H -4.500110 5.142625 -4.228394  
C 2.184428 2.494337 -4.977085  
H 2.531632 1.854130 -5.794514  
H 1.232162 2.940618 -5.282748  
H 2.910792 3.302731 -4.844342  
H 0.684265 3.934500 -0.740079  
H 0.465052 2.828433 -2.618698

**<sup>1</sup>TS12<sup>1c-5</sup>**

B3LYP/BSI SCF energy: -2923.334701a.u.

M06/BSII SCF energy in solution: -2922.02508a.u.

M06/BSII free energy in solution: -2921.045457a.u.

C 0.963633 -1.134339 -1.456604  
N 1.256630 -0.622460 -0.318163  
O 1.993058 -1.512936 -2.249512  
C 3.193980 -1.525531 -1.379323

|    |           |           |           |   |           |           |           |
|----|-----------|-----------|-----------|---|-----------|-----------|-----------|
| C  | 2.733185  | -0.512496 | -0.258212 | C | -0.509390 | -2.967006 | -2.266004 |
| H  | 3.069542  | -0.859869 | 0.717667  | H | 0.310775  | -3.313720 | -2.896527 |
| C  | 3.206230  | 0.924751  | -0.418862 | H | -0.453133 | -3.493273 | -1.308852 |
| C  | 4.428286  | 1.300694  | 0.156469  | H | -1.458921 | -3.206532 | -2.748855 |
| C  | 2.475104  | 1.883263  | -1.127600 | C | -0.482600 | -0.712051 | -3.436741 |
| C  | 4.914922  | 2.598854  | 0.012490  | H | -1.432015 | -0.949285 | -3.918914 |
| H  | 5.001995  | 0.572539  | 0.722679  | H | -0.411207 | 0.373626  | -3.323325 |
| C  | 2.955692  | 3.187072  | -1.267206 | H | 0.334825  | -1.048997 | -4.076581 |
| H  | 1.511424  | 1.628265  | -1.553424 | C | -4.203171 | 0.716991  | -1.632117 |
| C  | 4.178743  | 3.546520  | -0.701444 | C | -4.259491 | 0.740798  | -3.034491 |
| H  | 5.863438  | 2.871561  | 0.466349  | C | -4.595322 | 1.863866  | -0.930258 |
| H  | 2.362717  | 3.919870  | -1.805260 | C | -4.671006 | 1.886200  | -3.713035 |
| H  | 4.550702  | 4.561785  | -0.804956 | H | -3.979225 | -0.145428 | -3.592927 |
| C  | -1.553009 | -0.984937 | -1.190802 | C | -5.013837 | 3.010676  | -1.610523 |
| N  | -1.555081 | -0.491723 | -0.003580 | H | -4.585333 | 1.884130  | 0.154784  |
| O  | -2.755042 | -1.207234 | -1.768730 | C | -5.048090 | 3.028310  | -3.003112 |
| C  | -3.785304 | -0.584717 | -0.930352 | H | -4.700113 | 1.884870  | -4.798912 |
| C  | -2.972656 | -0.336151 | 0.414426  | H | -5.302822 | 3.891047  | -1.044736 |
| H  | -3.114430 | 0.700940  | 0.719345  | H | -5.364649 | 3.922681  | -3.531081 |
| C  | -3.322126 | -1.212376 | 1.604025  | C | -4.958548 | -1.558851 | -0.828102 |
| C  | -4.201201 | -0.719034 | 2.575649  | C | -6.223039 | -1.102027 | -0.433380 |
| C  | -2.802850 | -2.503662 | 1.756315  | C | -4.792313 | -2.921358 | -1.104897 |
| C  | -4.563052 | -1.499742 | 3.674178  | C | -7.292348 | -1.988131 | -0.308877 |
| H  | -4.603004 | 0.286775  | 2.477770  | H | -6.380821 | -0.047464 | -0.233899 |
| C  | -3.160087 | -3.284659 | 2.855213  | C | -5.865822 | -3.805696 | -0.990014 |
| H  | -2.098760 | -2.893406 | 1.028716  | H | -3.824171 | -3.291150 | -1.420239 |
| C  | -4.041967 | -2.786181 | 3.816068  | C | -7.119150 | -3.344290 | -0.588811 |
| H  | -5.243048 | -1.099435 | 4.420420  | H | -8.264212 | -1.613842 | -0.000607 |
| H  | -2.742293 | -4.281162 | 2.964311  | H | -5.718373 | -4.857907 | -1.216123 |
| H  | -4.314902 | -3.394099 | 4.673667  | H | -7.954006 | -4.033070 | -0.499088 |
| Ni | 0.033108  | -0.487198 | 1.338270  | C | 4.394827  | -1.081249 | -2.196174 |
| C  | -0.393016 | -1.428009 | -2.060011 | C | 5.687623  | -1.346318 | -1.721863 |

|   |           |           |           |   |           |           |           |
|---|-----------|-----------|-----------|---|-----------|-----------|-----------|
| C | 4.246390  | -0.370377 | -3.391889 | H | -1.012512 | 3.819943  | -3.924369 |
| C | 6.806631  | -0.905350 | -2.426757 | H | -0.137636 | 6.141461  | -3.642880 |
| H | 5.819468  | -1.907166 | -0.801518 | C | -1.121154 | 2.233017  | 4.244650  |
| C | 5.367814  | 0.062776  | -4.101425 | H | -0.985579 | 1.239542  | 4.685532  |
| H | 3.252631  | -0.158321 | -3.767632 | H | -0.248822 | 2.842131  | 4.502106  |
| C | 6.650759  | -0.200701 | -3.621876 | C | 0.656139  | -1.078389 | 3.132118  |
| H | 7.800398  | -1.118055 | -2.043394 | H | 1.041887  | -2.104655 | 2.984148  |
| H | 5.234745  | 0.609574  | -5.030529 | H | -0.305533 | -1.221247 | 3.656211  |
| H | 7.522173  | 0.138346  | -4.174436 | C | 1.607949  | -0.336230 | 4.084876  |
| C | 3.313651  | -2.978626 | -0.893631 | H | 1.209966  | 0.658425  | 4.321586  |
| C | 3.770575  | -3.948548 | -1.802554 | H | 1.670767  | -0.866141 | 5.052876  |
| C | 2.900129  | -3.399397 | 0.377796  | C | 3.040231  | -0.159258 | 3.566982  |
| C | 3.828956  | -5.293771 | -1.447167 | H | 3.437171  | -1.139005 | 3.254074  |
| H | 4.087075  | -3.641625 | -2.794219 | H | 3.020372  | 0.474149  | 2.670344  |
| C | 2.964006  | -4.750059 | 0.735309  | C | 3.994627  | 0.452933  | 4.601425  |
| H | 2.511495  | -2.695380 | 1.104846  | H | 4.010673  | -0.182004 | 5.499538  |
| C | 3.429223  | -5.700145 | -0.171322 | H | 3.597903  | 1.425509  | 4.926541  |
| H | 4.190777  | -6.024395 | -2.165099 | C | 5.430339  | 0.642052  | 4.095385  |
| H | 2.645333  | -5.050648 | 1.729179  | H | 5.823840  | -0.325985 | 3.752838  |
| H | 3.480582  | -6.747930 | 0.110629  | H | 5.417592  | 1.296343  | 3.213145  |
| C | -1.204679 | 2.109495  | 2.760783  | C | 6.374341  | 1.229051  | 5.150149  |
| C | -0.787639 | 3.212346  | 1.915725  | H | 6.434378  | 0.580194  | 6.031753  |
| N | -0.939638 | 2.984302  | 0.542623  | H | 7.390392  | 1.353902  | 4.759796  |
| C | -0.709824 | 3.859941  | -0.523703 | H | 6.025339  | 2.211291  | 5.488948  |
| C | -0.229515 | 5.173837  | -0.365039 | O | -0.377670 | 4.286492  | 2.374285  |
| C | -0.991641 | 3.391893  | -1.822760 | C | -2.378295 | 2.893575  | 4.856836  |
| C | -0.032167 | 5.975024  | -1.489516 | H | -3.281783 | 2.316572  | 4.629246  |
| H | -0.015908 | 5.534324  | 0.630880  | H | -2.286894 | 2.959233  | 5.946706  |
| C | -0.783002 | 4.203944  | -2.933911 | H | -2.505542 | 3.905189  | 4.461334  |
| H | -1.400999 | 2.392836  | -1.950815 | H | -1.773984 | 1.289044  | 2.338407  |
| C | -0.297675 | 5.504856  | -2.777817 | H | -1.107465 | 2.020260  | 0.284756  |
| H | 0.340546  | 6.986506  | -1.350107 |   |           |           |           |



**<sup>2</sup>TS16<sup>1c</sup>-R**

B3LYP/BSI SCF energy: -2936.785026a.u.

M06/BSII SCF energy in solution: -2935.434977a.u.

M06/BSII free energy in solution: -2934.451481a.u.

C 0.515366 -1.849883 -0.881141

N 0.879470 -1.100688 0.094376

O 1.224123 -2.968811 -1.096265

C 2.136907 -3.165317 0.054284

C 2.012156 -1.760645 0.794562

C -1.751265 -0.806554 -1.303124

N -1.798692 -0.112753 -0.226772

O -2.866834 -0.836453 -2.058248

C -3.882542 0.025444 -1.444332

Ni -0.167752 0.522369 0.943218

C -0.622520 -1.653626 -1.871107

C -1.216908 -3.042133 -2.238914

H -0.435759 -3.675419 -2.658240

H -1.626389 -3.548292 -1.359744

H -2.009365 -2.917029 -2.977431

C -0.051819 -0.988238 -3.157039

H -0.864006 -0.801696 -3.864232

H 0.469077 -0.050320 -2.948993

H 0.657505 -1.676292 -3.625266

C -4.130081 1.196233 -2.402329

C -4.547959 2.451040 -1.940645

C -4.012689 0.996146 -3.785194

C -4.834853 3.483064 -2.837368

H -4.658206 2.637805 -0.876882

C -4.289009 2.029030 -4.679924

H -3.702134 0.027168 -4.159506

C -4.702853 3.277480 -4.210295

H -5.157126 4.448005 -2.457215

H -4.184141 1.855798 -5.747048

H -4.921595 4.080512 -4.907808

C -5.159086 -0.809017 -1.282242

C -5.151244 -2.195813 -1.471262

C -6.367107 -0.185969 -0.938918

C -6.321644 -2.942003 -1.315703

H -4.232435 -2.697225 -1.748238

C -7.532103 -0.932298 -0.775096

H -6.405075 0.888958 -0.802434

C -7.515744 -2.315411 -0.964348

H -6.294012 -4.016725 -1.471691

H -8.455667 -0.429144 -0.504076

H -8.425353 -2.896060 -0.842263

C 3.523804 -3.487012 -0.484415

C 4.551015 -3.797582 0.419443

C 3.806936 -3.487949 -1.853310

C 5.834274 -4.086863 -0.037326

H 4.344935 -3.810984 1.485121

C 5.094051 -3.783962 -2.311133

H 3.020981 -3.260708 -2.563651

C 6.111743 -4.081148 -1.406906

H 6.618437 -4.318282 0.677614

H 5.295656 -3.781091 -3.378594

H 7.112300 -4.308728 -1.762948

C 1.527258 -4.337812 0.840922

C 1.883838 -5.655287 0.510567

C 0.532437 -4.138580 1.811019

C 1.282030 -6.741202 1.144653

H 2.640452 -5.833671 -0.245314

C -0.066565 -5.228755 2.446832

H 0.206300 -3.142570 2.095607

|   |           |           |           |    |           |           |           |
|---|-----------|-----------|-----------|----|-----------|-----------|-----------|
| C | 0.306188  | -6.532125 | 2.120563  | C  | 0.185911  | 6.413245  | 4.564803  |
| H | 1.579686  | -7.750946 | 0.876159  | H  | -0.183859 | 7.074218  | 3.768463  |
| H | -0.824235 | -5.047165 | 3.203586  | H  | -0.687146 | 6.171229  | 5.186163  |
| H | -0.158133 | -7.377267 | 2.620962  | C  | 1.221255  | 7.162110  | 5.410300  |
| C | 1.857330  | 2.441318  | -1.898285 | H  | 2.092554  | 7.447939  | 4.809358  |
| O | 1.921772  | 1.735937  | -2.916570 | H  | 0.802407  | 8.076929  | 5.843259  |
| C | 4.264376  | 3.195434  | -1.865474 | H  | 1.582460  | 6.538702  | 6.236303  |
| C | 5.185392  | 3.955793  | -1.121790 | Br | -0.273106 | -0.595941 | 3.201722  |
| C | 4.673063  | 2.620270  | -3.081983 | C  | 3.257198  | -0.901281 | 0.876823  |
| C | 6.487109  | 4.135158  | -1.578290 | C  | 3.859238  | -0.323235 | -0.248577 |
| H | 4.875317  | 4.401138  | -0.179123 | C  | 3.853491  | -0.722866 | 2.132647  |
| C | 5.982501  | 2.811619  | -3.524539 | C  | 5.056107  | 0.381351  | -0.121811 |
| H | 3.964766  | 2.037013  | -3.652426 | H  | 3.400741  | -0.423508 | -1.227846 |
| C | 6.897540  | 3.562562  | -2.784833 | C  | 5.043801  | -0.005531 | 2.262092  |
| H | 7.182163  | 4.725093  | -0.987545 | H  | 3.376255  | -1.144366 | 3.013212  |
| H | 6.286948  | 2.362715  | -4.466110 | C  | 5.652600  | 0.539169  | 1.131613  |
| H | 7.913415  | 3.701439  | -3.141751 | H  | 5.521165  | 0.810463  | -1.002363 |
| C | -0.658591 | 2.755398  | -2.021462 | H  | 5.490844  | 0.124935  | 3.243568  |
| H | -0.697450 | 1.875276  | -2.669150 | H  | 6.583494  | 1.091680  | 1.222923  |
| H | -1.524987 | 2.722581  | -1.356493 | H  | 1.681164  | -1.924566 | 1.819181  |
| C | -0.787592 | 2.303340  | 1.629769  | C  | -3.157640 | 0.458113  | -0.086823 |
| H | -1.627482 | 2.012859  | 2.271754  | H  | -3.047126 | 1.542909  | -0.074948 |
| H | -1.183885 | 2.936694  | 0.824345  | C  | -3.833480 | 0.049584  | 1.208129  |
| C | 0.246254  | 3.069897  | 2.459545  | C  | -4.538898 | 1.010921  | 1.940630  |
| H | 0.623458  | 2.418502  | 3.257548  | C  | -3.789138 | -1.265040 | 1.684442  |
| H | 1.123941  | 3.333154  | 1.845787  | C  | -5.203568 | 0.665835  | 3.117989  |
| C | -0.300809 | 4.363745  | 3.093107  | H  | -4.558313 | 2.042671  | 1.597193  |
| H | -0.679778 | 5.025174  | 2.299198  | C  | -4.450576 | -1.612683 | 2.860592  |
| H | -1.168353 | 4.110969  | 3.718587  | H  | -3.221676 | -2.017100 | 1.146652  |
| C | 0.730310  | 5.123013  | 3.938171  | C  | -5.162683 | -0.650055 | 3.578841  |
| H | 1.604782  | 5.366299  | 3.315817  | H  | -5.741234 | 1.425722  | 3.677611  |
| H | 1.101520  | 4.462452  | 4.734574  | H  | -4.401492 | -2.635293 | 3.222502  |

H -5.672470 -0.922586 4.498314  
N 2.967163 3.068138 -1.346564  
H 2.797601 3.580940 -0.492733  
C -0.763924 4.014147 -2.915843  
H -0.729799 4.930330 -2.316673  
H 0.059488 4.044226 -3.635444  
H -1.707213 4.004945 -3.470779  
C 0.602158 2.746781 -1.217094  
H 0.639311 3.364735 -0.326149

**<sup>2</sup>TS16<sup>1c-5</sup>**

B3LYP/BSI SCF energy: -2936.784093a.u.

M06/BSII SCF energy in solution: -2935.442474a.u.

M06/BSII free energy in solution: -2934.454547a.u.

C 2.400080 1.231799 0.151969  
N 1.969938 0.038065 -0.045666  
O 3.719260 1.456110 -0.027709  
C 4.239558 0.265424 -0.745104  
C 3.187982 -0.801169 -0.295348  
C 0.154425 2.334817 0.534262  
N -0.585403 1.402134 0.040704  
O -0.468474 3.435690 0.993766  
C -1.914246 3.124052 1.049944  
Ni -0.047053 -0.537393 -0.504524  
C 1.658729 2.455250 0.637817  
C 2.092966 3.688345 -0.205861  
H 3.167907 3.838897 -0.104872  
H 1.870327 3.541369 -1.266447  
H 1.571003 4.579036 0.146549  
C 2.047061 2.690759 2.126679  
H 1.569193 3.601573 2.490630

H 1.724665 1.856092 2.753655  
H 3.130669 2.800465 2.209162  
C -2.203297 2.695798 2.494967  
C -2.642046 1.420274 2.862522  
C -1.993780 3.651604 3.506024  
C -2.874384 1.105899 4.206936  
H -2.792567 0.628720 2.138469  
C -2.222834 3.339289 4.842236  
H -1.657239 4.648002 3.235735  
C -2.669670 2.062014 5.197607  
H -3.187691 0.096644 4.451989  
H -2.057143 4.093032 5.606868  
H -2.850412 1.817399 6.240444  
C -2.692908 4.380552 0.683157  
C -2.092853 5.454858 0.017350  
C -4.056671 4.456389 0.999626  
C -2.841470 6.582903 -0.323617  
H -1.039120 5.412155 -0.230791  
C -4.805802 5.577833 0.647286  
H -4.531514 3.639395 1.534093  
C -4.199724 6.647781 -0.013934  
H -2.358413 7.411436 -0.833689  
H -5.861616 5.618210 0.898798  
H -4.780721 7.525650 -0.281071  
C 5.669826 0.003847 -0.305337  
C 6.366435 -1.062721 -0.891778  
C 6.319124 0.795856 0.646388  
C 7.679592 -1.340334 -0.519773  
H 5.881102 -1.673718 -1.647481  
C 7.639796 0.521309 1.011948  
H 5.794407 1.629050 1.099077  
C 8.322630 -0.547723 0.434514

|   |           |           |           |    |           |           |           |
|---|-----------|-----------|-----------|----|-----------|-----------|-----------|
| H | 8.202906  | -2.173702 | -0.979321 | H  | -2.433502 | -0.885113 | -0.049697 |
| H | 8.131800  | 1.147612  | 1.750762  | C  | -2.410026 | -2.049312 | -1.874245 |
| H | 9.348172  | -0.761475 | 0.720997  | H  | -1.899214 | -2.044672 | -2.844515 |
| C | 4.170894  | 0.620864  | -2.239728 | H  | -2.182134 | -3.015842 | -1.419434 |
| C | 5.081219  | 1.569712  | -2.735322 | C  | -3.932260 | -1.963829 | -2.106183 |
| C | 3.210164  | 0.093606  | -3.113799 | H  | -4.447134 | -1.993935 | -1.135164 |
| C | 5.036773  | 1.978009  | -4.065646 | H  | -4.181976 | -0.992390 | -2.558207 |
| H | 5.834310  | 1.983931  | -2.072142 | C  | -4.472838 | -3.091643 | -2.995352 |
| C | 3.171325  | 0.501199  | -4.451642 | H  | -4.217420 | -4.059393 | -2.542514 |
| H | 2.480942  | -0.636762 | -2.780333 | H  | -3.961860 | -3.064142 | -3.968947 |
| C | 4.080365  | 1.441366  | -4.931998 | C  | -5.989122 | -3.025520 | -3.218644 |
| H | 5.753439  | 2.709611  | -4.428041 | H  | -6.497487 | -3.057568 | -2.245299 |
| H | 2.423346  | 0.073265  | -5.112618 | H  | -6.248931 | -2.055454 | -3.665559 |
| H | 4.049045  | 1.752037  | -5.972441 | C  | -6.520611 | -4.154726 | -4.107715 |
| C | -1.539382 | -2.411178 | 2.058949  | H  | -6.306684 | -5.135880 | -3.668482 |
| N | -1.695723 | -3.529770 | 1.256578  | H  | -7.604803 | -4.082446 | -4.247766 |
| C | -2.819365 | -4.352941 | 1.095277  | H  | -6.054881 | -4.130479 | -5.099918 |
| C | -4.021984 | -4.177334 | 1.803665  | Br | 0.715572  | -2.673596 | -1.465393 |
| C | -2.710007 | -5.422169 | 0.185435  | C  | 3.555991  | -1.624526 | 0.931005  |
| C | -5.080133 | -5.061097 | 1.590238  | C  | 3.798107  | -1.043132 | 2.183658  |
| H | -4.105451 | -3.356671 | 2.501247  | C  | 3.683511  | -3.013398 | 0.802151  |
| C | -3.777996 | -6.290707 | -0.017252 | C  | 4.161421  | -1.828956 | 3.276955  |
| H | -1.781475 | -5.564032 | -0.362082 | H  | 3.717568  | 0.031641  | 2.309700  |
| C | -4.973742 | -6.117694 | 0.684802  | C  | 4.045931  | -3.802844 | 1.895379  |
| H | -6.003636 | -4.914658 | 2.144340  | H  | 3.478840  | -3.479007 | -0.156631 |
| H | -3.671762 | -7.107808 | -0.725410 | C  | 4.286150  | -3.213138 | 3.136334  |
| H | -5.807048 | -6.796006 | 0.527823  | H  | 4.349617  | -1.359765 | 4.238414  |
| C | 0.214854  | -0.907337 | 3.134254  | H  | 4.135274  | -4.878645 | 1.775060  |
| H | 1.134594  | -0.397825 | 2.832151  | H  | 4.567748  | -3.825161 | 3.988401  |
| H | -0.567799 | -0.157558 | 3.270676  | H  | 2.965728  | -1.495252 | -1.099631 |
| C | -1.906766 | -0.893195 | -1.015020 | C  | -1.970639 | 1.964675  | -0.007524 |
| H | -2.136798 | 0.032918  | -1.547774 | H  | -2.679662 | 1.204699  | 0.307171  |

C -2.352047 2.406845 -1.416703  
C -3.702108 2.366507 -1.792877  
C -1.412453 2.867263 -2.345025  
C -4.104409 2.785928 -3.059460  
H -4.443615 1.994311 -1.091243  
C -1.812205 3.283950 -3.616566  
H -0.358539 2.882773 -2.090792  
C -3.158668 3.247567 -3.977503  
H -5.154827 2.742794 -3.331898  
H -1.066450 3.631619 -4.325823  
H -3.468574 3.567447 -4.968011  
O -2.458215 -1.927364 2.742215  
C -0.183425 -1.872859 2.066718  
H 0.597166 -2.422247 1.549850  
C 0.454291 -1.608762 4.492175  
H 1.247484 -2.358809 4.415791  
H 0.748899 -0.877290 5.253384  
H -0.461335 -2.102263 4.828971  
H -0.922485 -3.716861 0.626168
